# Supplementary material for: Design, synthesis, bio-evaluation, and in silico studies of some N-substituted 6-(chloro/nitro)-1H-benzimidazole derivatives as antimicrobial and anticancer agents
Source: Royal Society of Chemistry journal article supplement (doi:10.1039/d2ra03491c), 2022-01-01
Supplement: d2ra03491c1.pdf [file d2ra03491c1.pdf]

## THE SUPPORTING INFORMATION

**Table S1** *In silico* ADMET profile of the most active compounds, ciprofloxacin, fluconazole, and paclitaxel

| Parameter           | 1d                   | 2d                   | 3s                    | 4b                   | 4k                   | Cipro                | Flu                  | PTX                  |
|---------------------|----------------------|----------------------|-----------------------|----------------------|----------------------|----------------------|----------------------|----------------------|
| <b>Absorption</b>   |                      |                      |                       |                      |                      |                      |                      |                      |
| Caco-2 permeability | -4.893               | -4.820               | -4.685                | -4.655               | -4.721               | -5.269               | -4.950               | -5.461               |
| MDCK permeability   | 9.0x10 <sup>-6</sup> | 8.6x10 <sup>-5</sup> | 11.0x10 <sup>-5</sup> | 8.8x10 <sup>-5</sup> | 2.8x10 <sup>-5</sup> | 3.0x10 <sup>-6</sup> | 2.8x10 <sup>-5</sup> | 5.4x10 <sup>-5</sup> |
| Pgp-inhibitor       | --                   | ---                  | +++                   | +++                  | +++                  | ---                  | ---                  | +++                  |
| Pgp-substrate       | ---                  | ---                  | ++                    | ---                  | ---                  | +++                  | ---                  | +++                  |
| HIA                 | +++                  | +++                  | +++                   | +++                  | +++                  | +++                  | +++                  | +++                  |
| F <sub>20%</sub>    | +++                  | +++                  | +                     | +++                  | +++                  | +++                  | +++                  | ---                  |
| F <sub>30%</sub>    | ---                  | +++                  | +++                   | ++                   | +++                  | +++                  | +++                  | ---                  |
| <b>Distribution</b> |                      |                      |                       |                      |                      |                      |                      |                      |
| PPB (%)             | 99.953               | 100.185              | 99.428                | 100.069              | 98.764               | 37.456               | 61.763               | 94.571               |
| VD (L/kg)           | 1.485                | 0.460                | 1.171                 | 0.324                | 0.385                | 2.324                | 0.835                | 0.907                |
| BBB penetration     | ---                  | -                    | ++                    | +                    | --                   | ---                  | +++                  | --                   |
| Fu (%)              | 1.174                | 0.672                | 1.322                 | 0.638                | 1.170                | 78.856               | 51.002               | 6.779                |
| Log Kp (cm/s)       | -4.54                | -4.86                | -4.64                 | -4.92                | -5.03                | -9.090               | -7.920               |                      |
| <b>Metabolism</b>   |                      |                      |                       |                      |                      |                      |                      |                      |
| CYP1A2 inhibitor    | +++                  | +++                  | +++                   | +++                  | ++                   | --                   | -                    | ---                  |
| CYP1A2 substrate    | --                   | --                   | -                     | --                   | --                   | --                   | -                    | ---                  |
| CYP2C19 inhibitor   | ++                   | +++                  | ++                    | +++                  | ++                   | ---                  | +                    | ---                  |
| CYP2C19 substrate   | ---                  | ---                  | ---                   | ---                  | ---                  | --                   | ---                  | ---                  |
| CYP2C9 inhibitor    | +                    | ++                   | ++                    | +++                  | ++                   | ---                  | --                   | ++                   |

|                         |       |       |       |       |       |       |       |       |
|-------------------------|-------|-------|-------|-------|-------|-------|-------|-------|
| CYP2C9 substrate        | ++    | ++    | +     | ++    | ++    | ---   | +     | ---   |
| CYP2D6 inhibitor        | ++    | ++    | +++   | ++    | ++    | ---   | -     | ---   |
| CYP2D6 substrate        | -     | -     | ++    | ++    | ++    | --    | --    | ---   |
| CYP3A4 inhibitor        | --    | +     | +     | ++    | +     | ---   | -     | ++    |
| CYP3A4 substrate        | -     | --    | --    | --    | -     | --    | --    | +     |
| <b>Excretion</b>        |       |       |       |       |       |       |       |       |
| CL (mL/min/kg)          | 4.885 | 3.983 | 7.914 | 4.476 | 6.550 | 3.214 | 5.960 | 3.416 |
| T <sub>1/2</sub>        | 0.125 | 0.170 | 0.082 | 0.066 | 0.056 | 0.056 | 0.228 | 0.028 |
| <b>Toxicity</b>         |       |       |       |       |       |       |       |       |
| hERG blockers           | --    | -     | ++    | --    | +++   | --    | ---   | --    |
| H-HT                    | --    | --    | ---   | ---   | ---   | +++   | +++   | +++   |
| DILI                    | ++    | ++    | -     | -     | +     | +++   | +++   | +++   |
| AMES toxicity           | -     | +++   | +++   | +++   | +++   | --    | ++    | ---   |
| Rat oral acute toxicity | --    | --    | --    | ---   | ---   | --    | +++   | -     |
| FDAMDD                  | ++    | ++    | ++    | ++    | ++    | ++    | ++    | ++    |
| Skin sensitization      | --    | -     | ---   | -     | -     | +     | +++   | ---   |
| Carcinogenicity         | -     | +     | ++    | +     | ++    | -     | +++   | ---   |
| Eye corrosion           | ---   | ---   | ---   | ---   | ---   | ---   | ---   | ---   |
| Eye irritation          | +++   | +++   | +++   | +++   | +++   | ---   | --    | ---   |
| Respiratory toxicity    | --    | +++   | ++    | ++    | ++    | ++    | ++    | +++   |
| <b>Tox21 Pathway</b>    |       |       |       |       |       |       |       |       |
| NR-AR                   | +     | +     | --    | -     | -     | ++    | ---   | --    |
| NR-AR-LBD               | ---   | +     | --    | ++    | +     | ---   | ---   | +++   |
| NR-AhR                  | ++    | +++   | +     | +++   | ++    | --    | +     | ---   |

|               |     |     |     |     |     |     |     |     |
|---------------|-----|-----|-----|-----|-----|-----|-----|-----|
| NR-Aromatase  | ++  | ++  | ++  | +   | ++  | --- | +++ | ++  |
| NR-ER         | ++  | ++  | ++  | ++  | ++  | -   | --- | +   |
| NR-ER-LBD     | -   | -   | -   | +   | +   | --- | --- | +   |
| NR-PPAR-gamma | --- | --- | --- | --- | --- | --- | --- | +++ |
| SR-ARE        | ++  | +++ | +++ | +++ | +++ | -   | --  | ++  |
| SR-ATAD5      | +++ | ++  | +   | +   | -   | --- | --- | +++ |
| SR-HSE        | +   | -   | --- | -   | --  | --- | --- | -   |
| SR-MMP        | ++  | ++  | ++  | ++  | +++ | --- | --  | +++ |
| SR-p53        | ++  | +++ | ++  | +++ | +++ | --- | --- | +++ |

#### Toxicophore Rules

|                                   |          |          |          |          |          |          |         |          |
|-----------------------------------|----------|----------|----------|----------|----------|----------|---------|----------|
| Acute Toxicity Rule               | 0 alert  | 1 alert  | 0 alert | 0 alert  |
| Genotoxic Carcinogenicity Rule    | 0 alerts | 5 alert  | 4 alert  | 5 alerts | 9 alerts | 1 alert  | 0 alert | 1 alert  |
| NonGenotoxic Carcinogenicity Rule | 1 alert  | 0 alert  | 1 alert  | 0 alert  | 1 alert  | 1 alert  | 0 alert | 0 alert  |
| Skin Sensitization Rule           | 1 alert  | 0 alert  | 0 alert | 6 alerts |
| Aquatic Toxicity Rule             | 1 alert  | 1 alert | 2 alerts |
| NonBiodegradable Rule             | 1 alert  | 3 alert  | 2 alert  | 3 alerts | 3 alerts | 2 alerts | 1 alert | 2 alerts |
| SureChEMBL Rule                   | 0 alert  | 0 alert | 0 alert  |
| FAF-Drugs4 Rule                   | 2 alerts | 4 alerts | 2 alerts | 5 alerts | 4 alerts | 1 alert  | 1 alert | 1 alert  |

---

**Cipro** - ciprofloxacin, **Flu** - fluconazole, **PTX** - paclitaxel, **Caco-2 permeability** (optimal: higher than -5.15 Log unit), **MDCK permeability** (low permeability:  $<2 \times 10^{-6}$  cm/s, medium permeability:  $2-20 \times 10^{-6}$  cm/s, high passive permeability:  $> 20 \times 10^{-6}$  cm/s), **Pgp** - P-glycoprotein, **HIA** - human intestinal absorption (-:  $<30\%$ , +:  $\geq 30\%$ ), **F** - bioavailability (-:  $<$ percent value, +:  $\geq$ percent value), **PPB** - plasma protein binding (optimal:  $<90\%$ ), **VD** - volume distribution (optimal: 0.04-20 L/kg), **BBB** - blood-brain barrier, **Fu** - the fraction unbound in plasmas (low:  $<5\%$ , middle: 5-20%, high:  $>20\%$ ), **Log Kp** (skin permeation), **CL** - clearance (low:  $<5$  mL/min/kg, moderate: 5-15 mL/min/kg, high:  $>15$  mL/min/kg), **T<sub>1/2</sub>** (category 1: long half-life ( $>3$  h), category 0: short half-life ( $<3$  h)), **H-HT** - human hepatotoxicity, **DILI** - drug-induced liver injury, **FDAMDD** - maximum

*recommended daily dose, **AR** - androgen receptor, **AR-LBD** - androgen receptor ligand-binding domain, **AhR** - aryl hydrocarbon receptor, **ER** - estrogen receptor, **ER-LBD** - estrogen receptor ligand-binding domain, **PPAR-gamma** - peroxisome proliferator-activated receptor gamma, **ARE** - antioxidant response element, **ATAD5** - ATPase family AAA domain-containing protein 5, **HSE** - heat shock factor response element, **MMP** - mitochondrial membrane potential.*

*The output value is the probability of being inhibitor/substrate/active/positive/high-toxicity/sensitizer/carcinogens/corrosives/irritants (category 1) or non-inhibitor/non-substrate/inactive/negative/low-toxicity/non-sensitizer/non-carcinogens/noncorrosives/nonirritants (category 0). For the classification endpoints, the prediction probability values are transformed into six symbols: 0-0.1(---), 0.1-0.3(--), 0.3-0.5(-), 0.5-0.7(+), 0.7-0.9(++), and 0.9-1.0(+++).*

# 1H NMR SPECTRA

Compound 3a

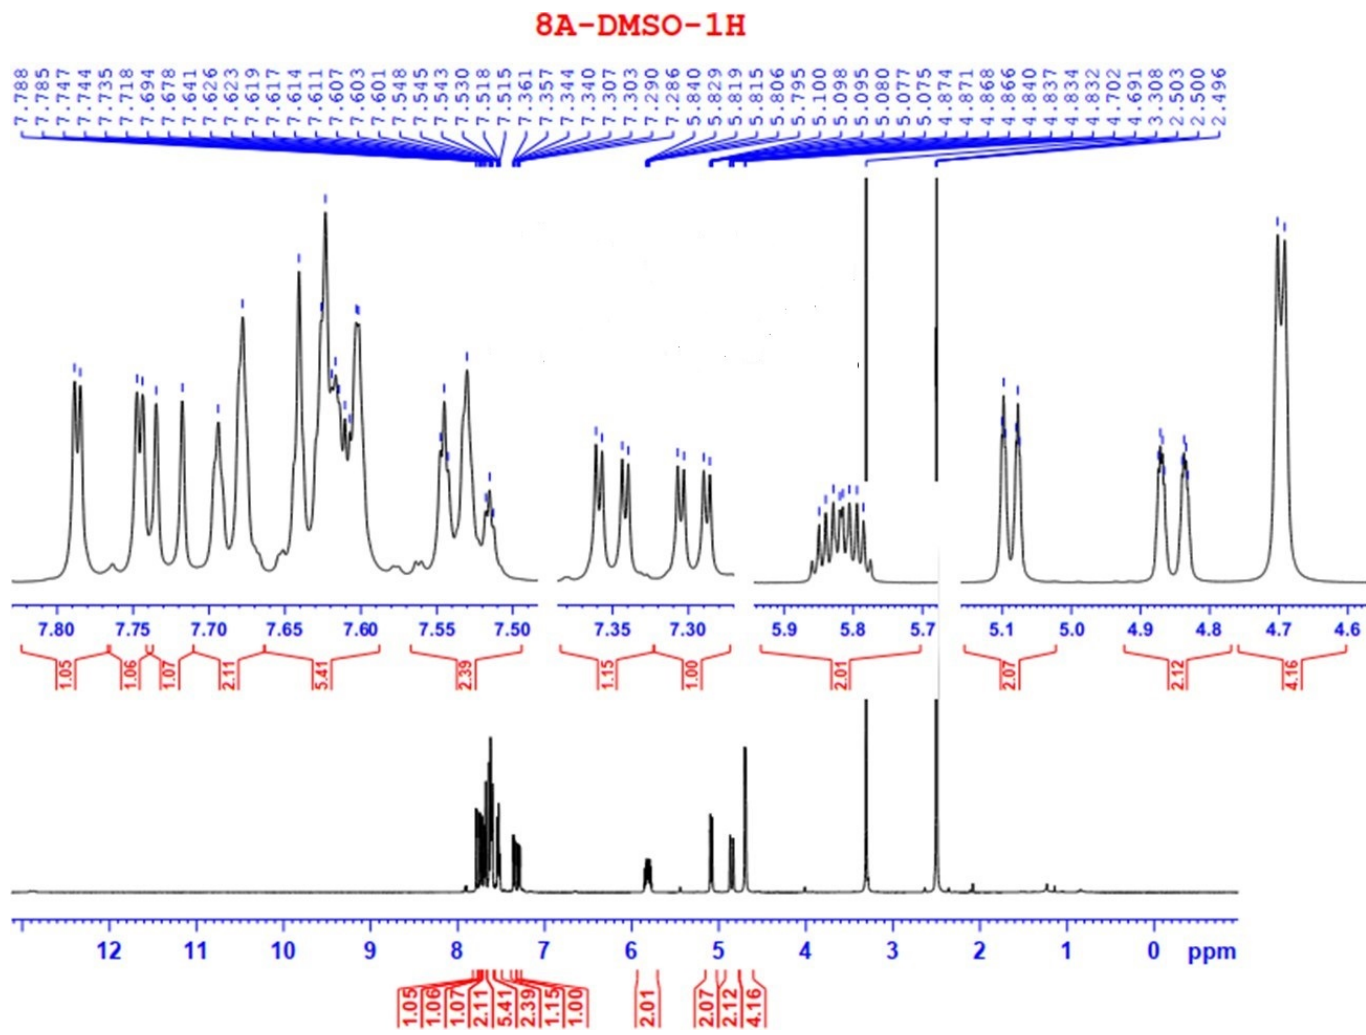



Compound 3c

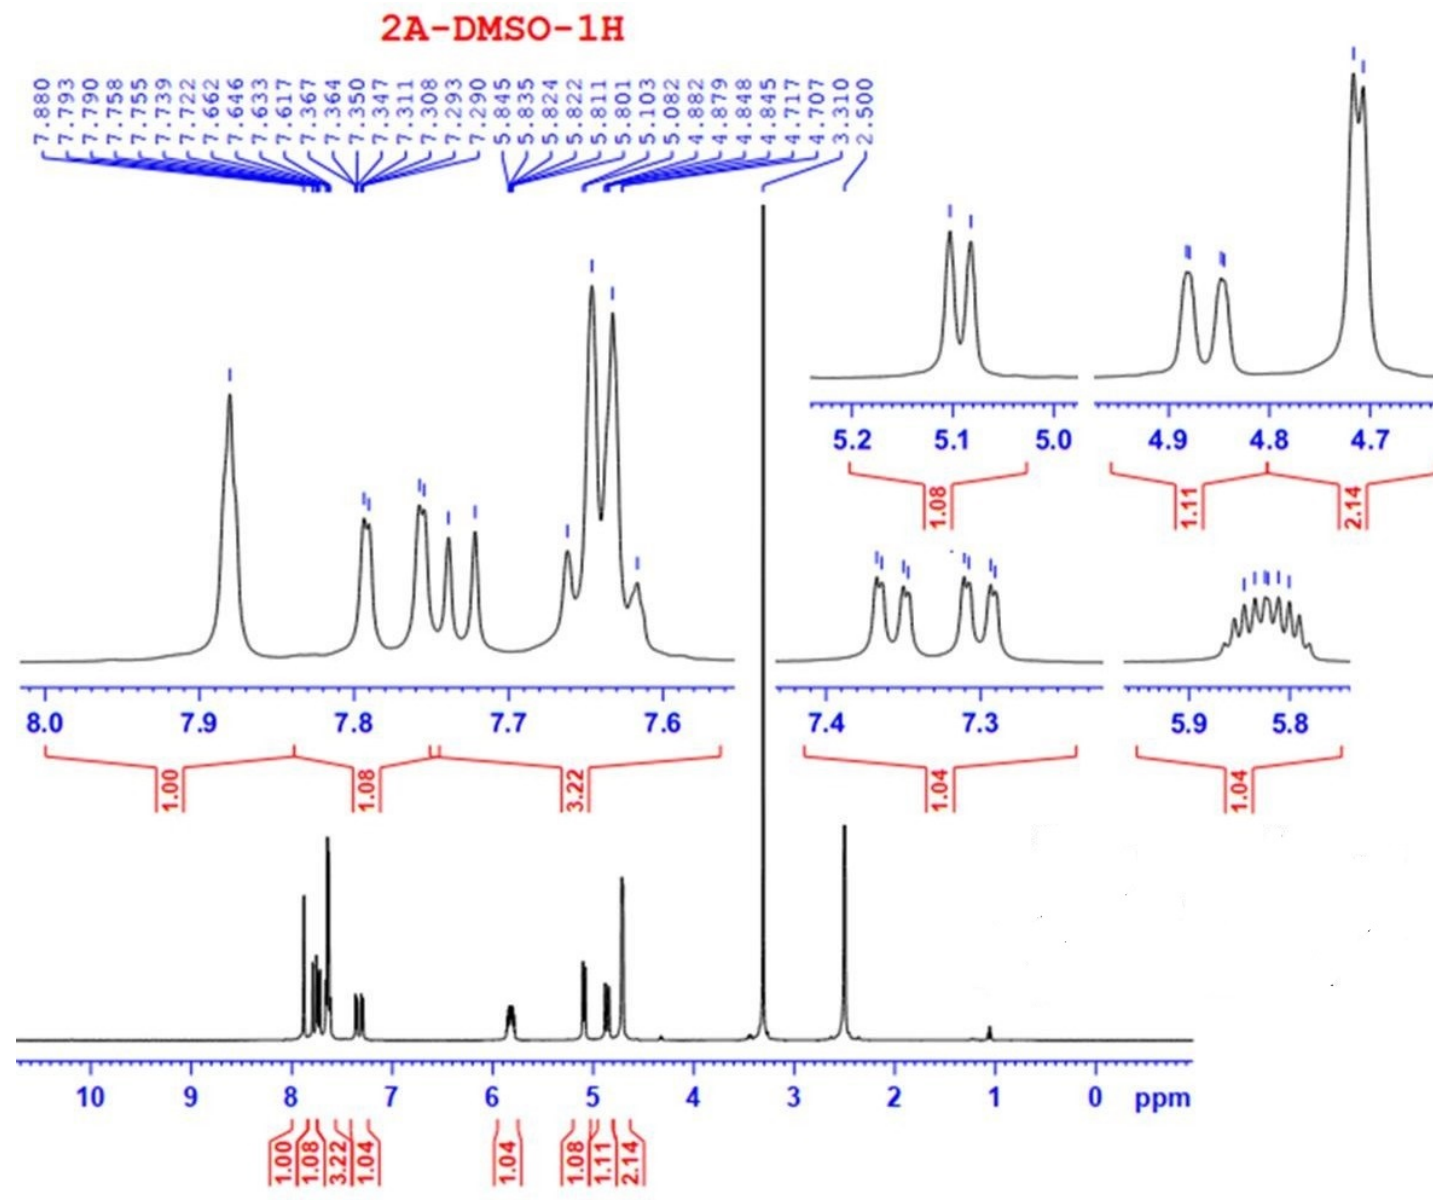

# Compound 3d

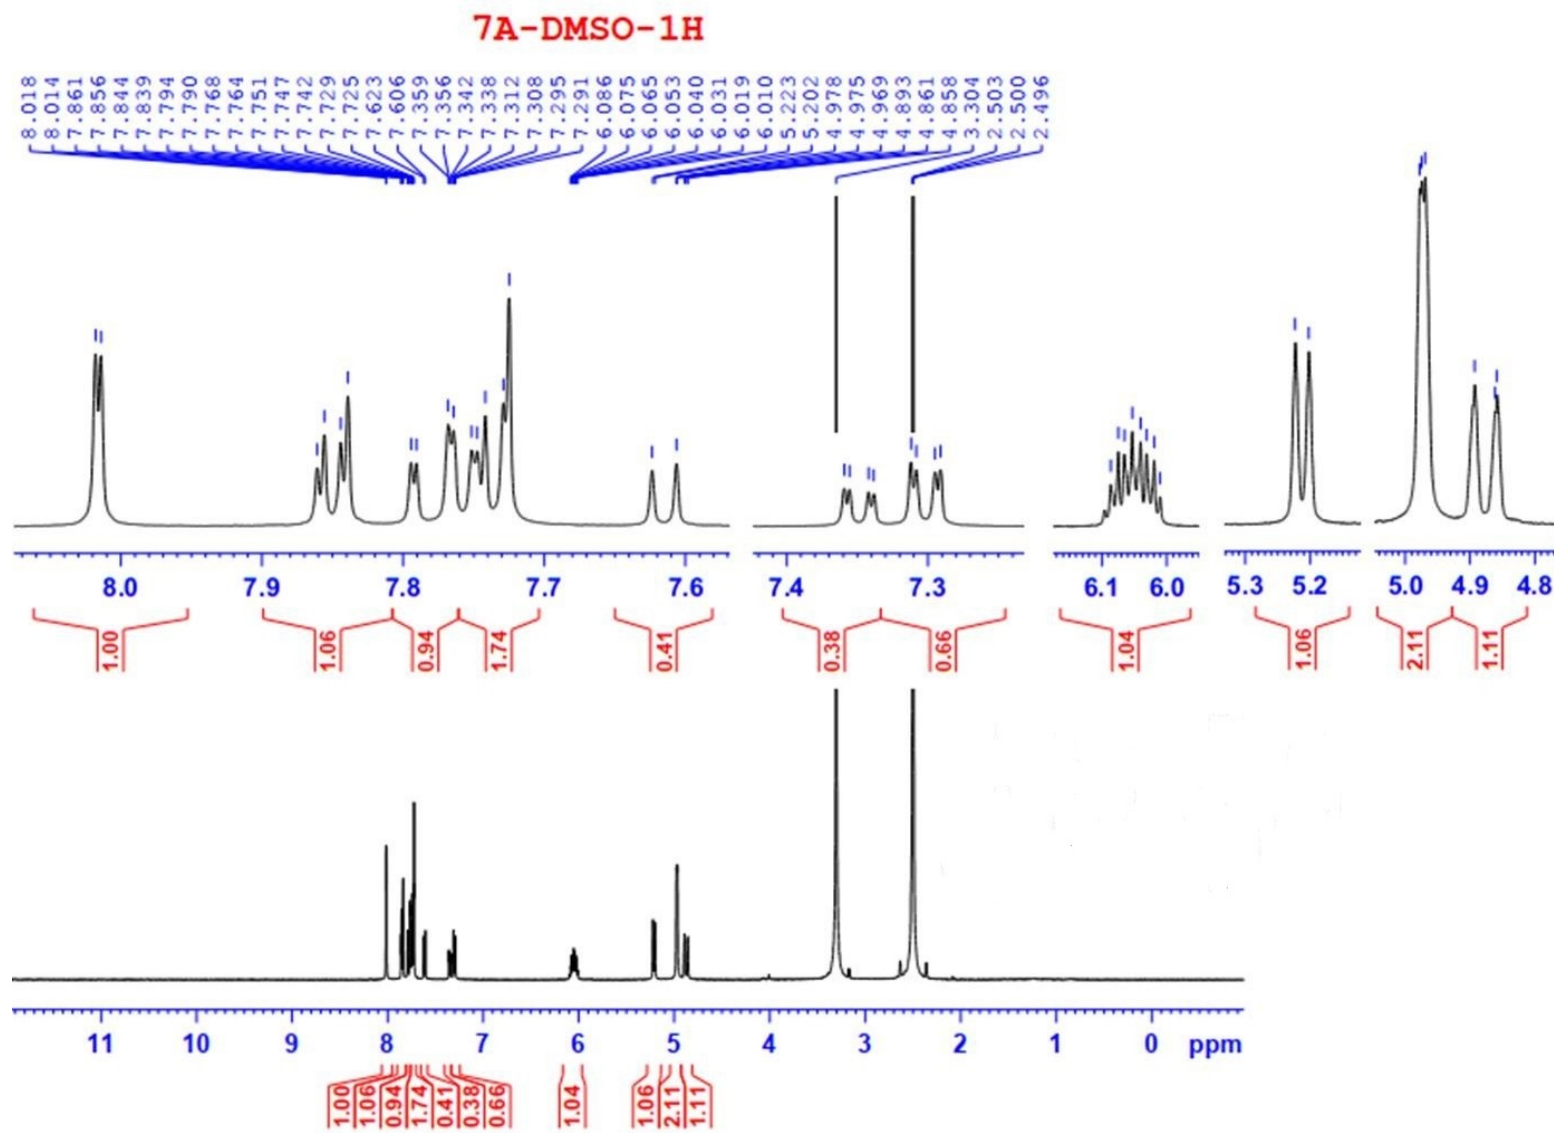



# Compound 3e

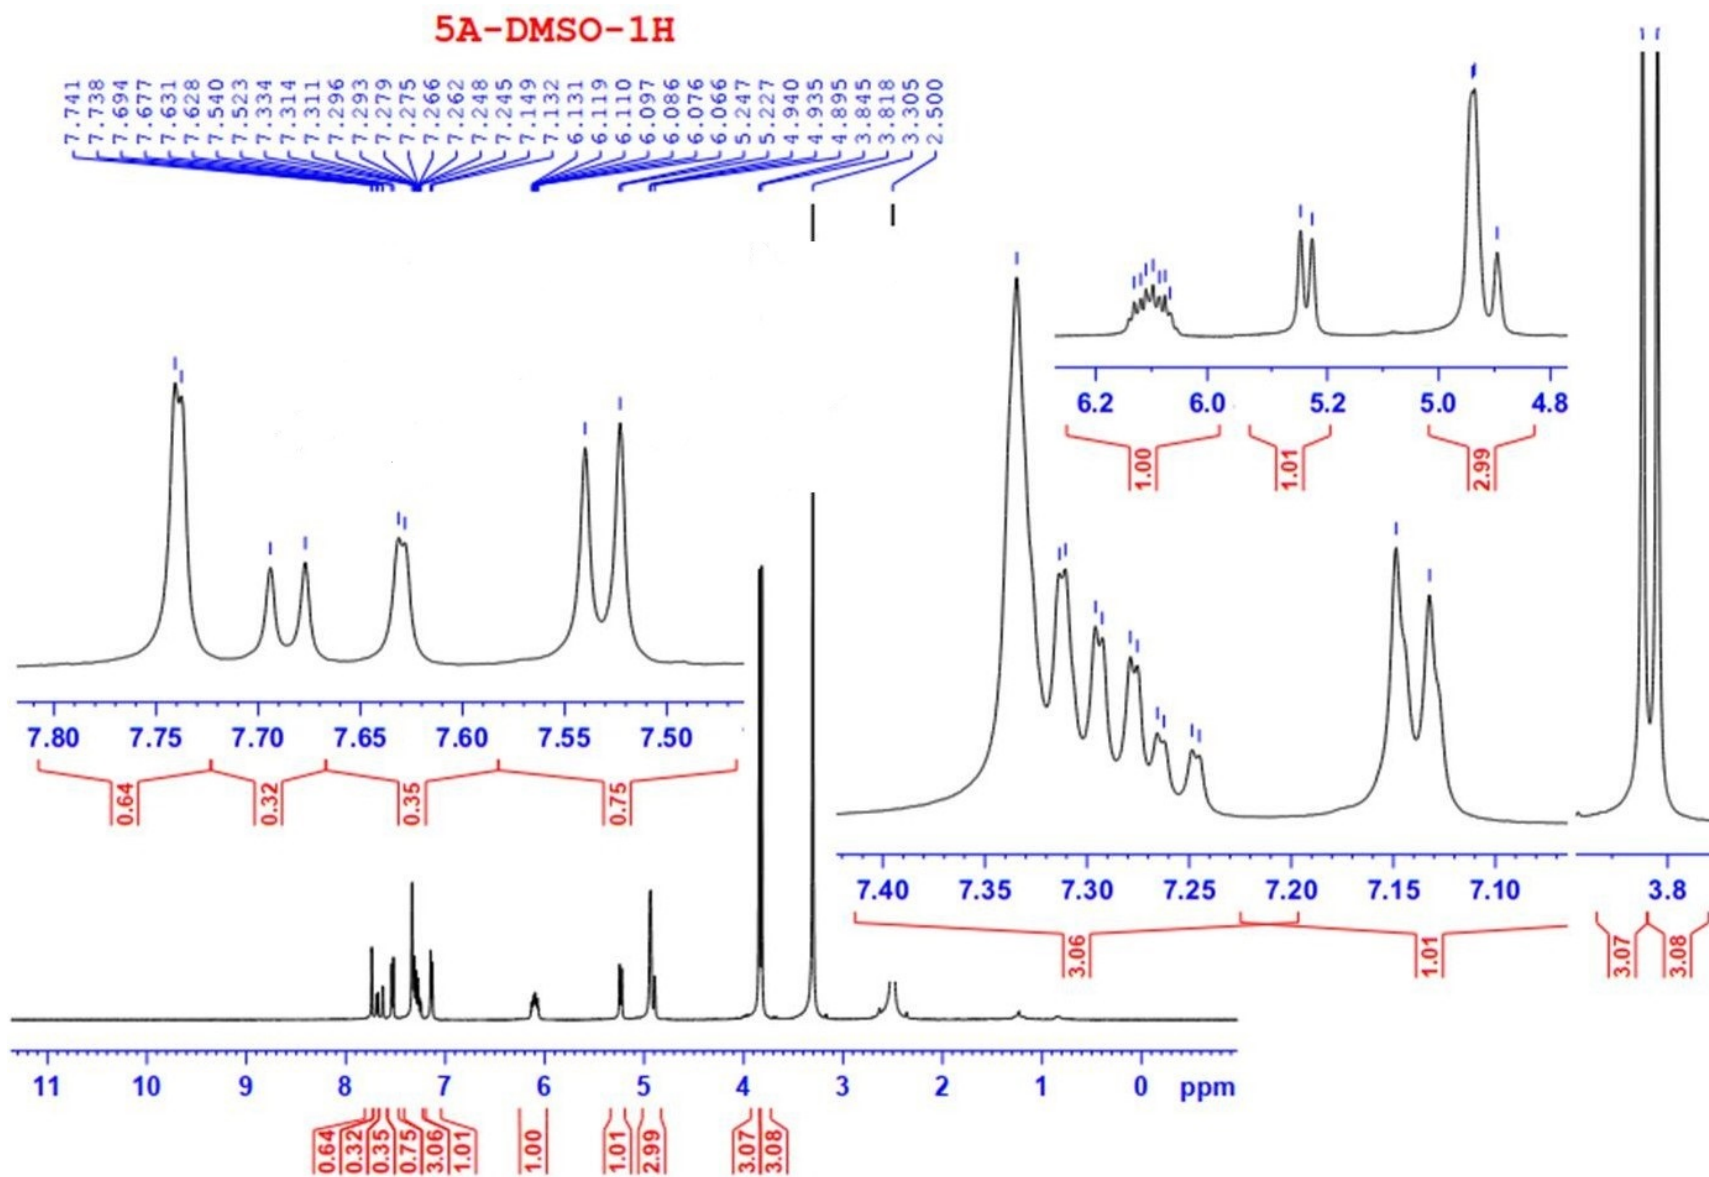

# Compound 3f

## 4A-DMSO-1H

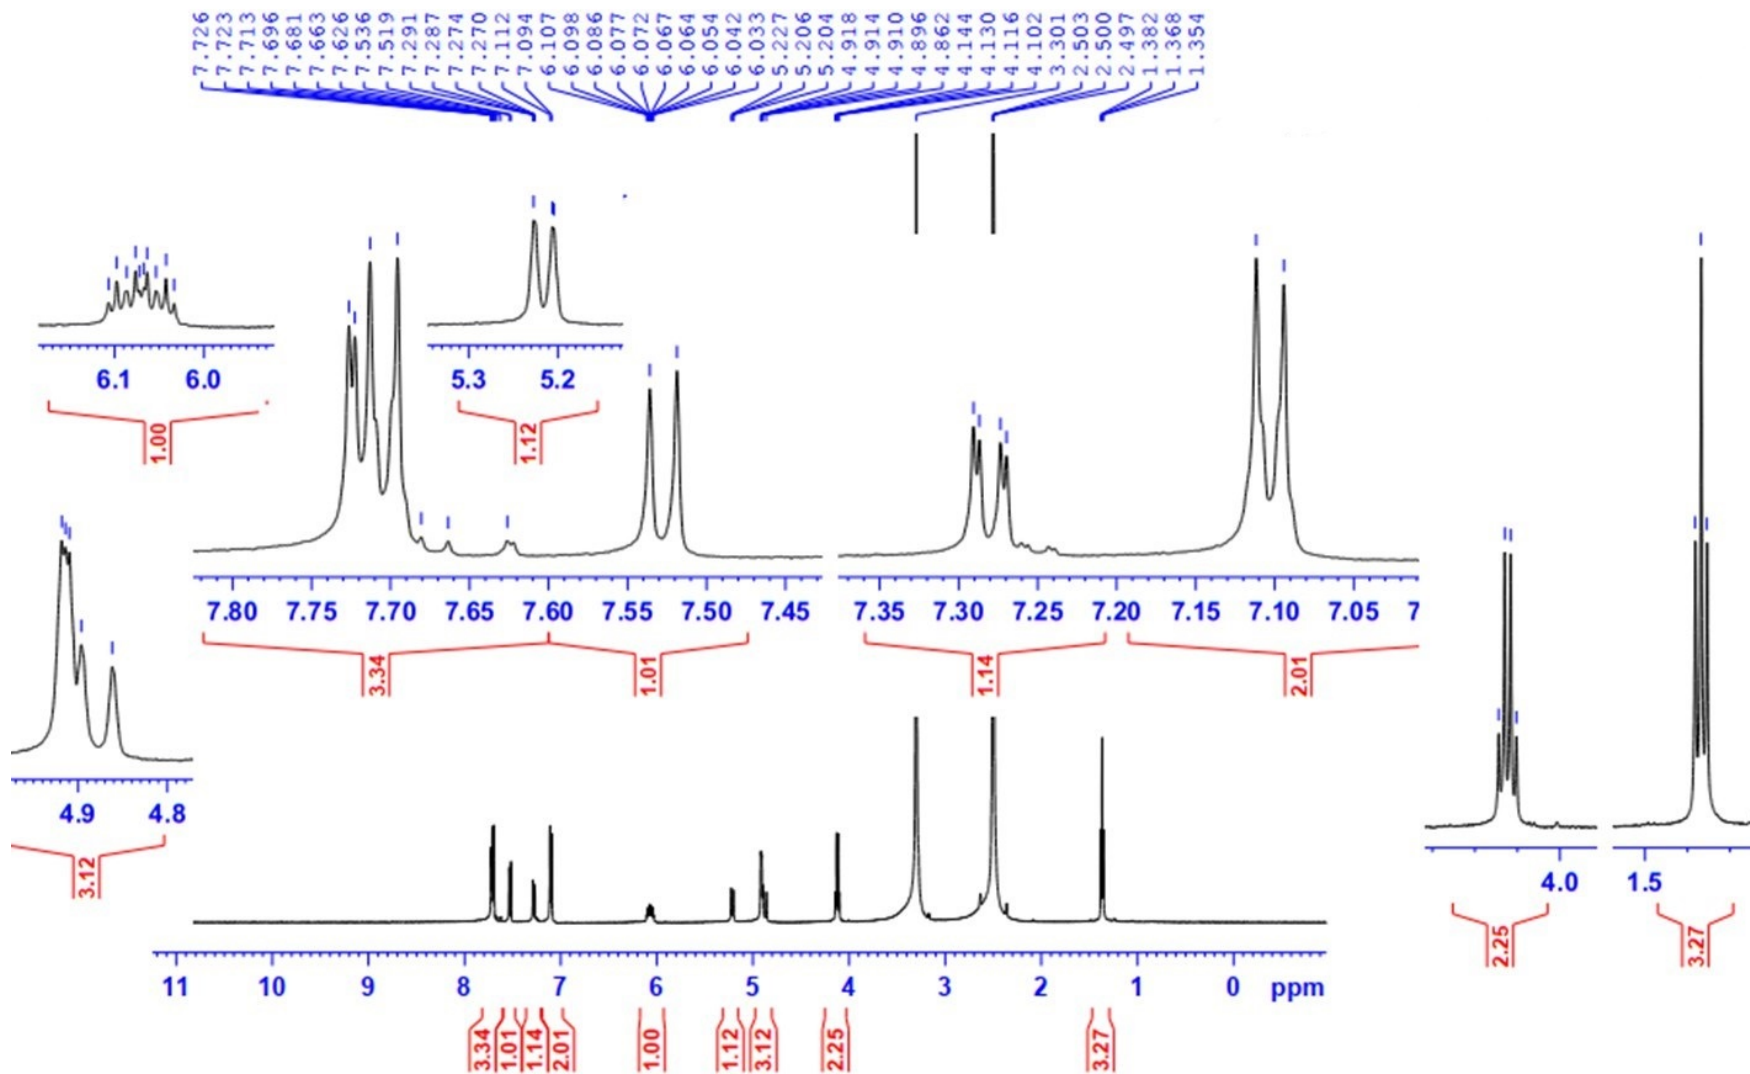

Compound 3g

1A-DMSO-1H

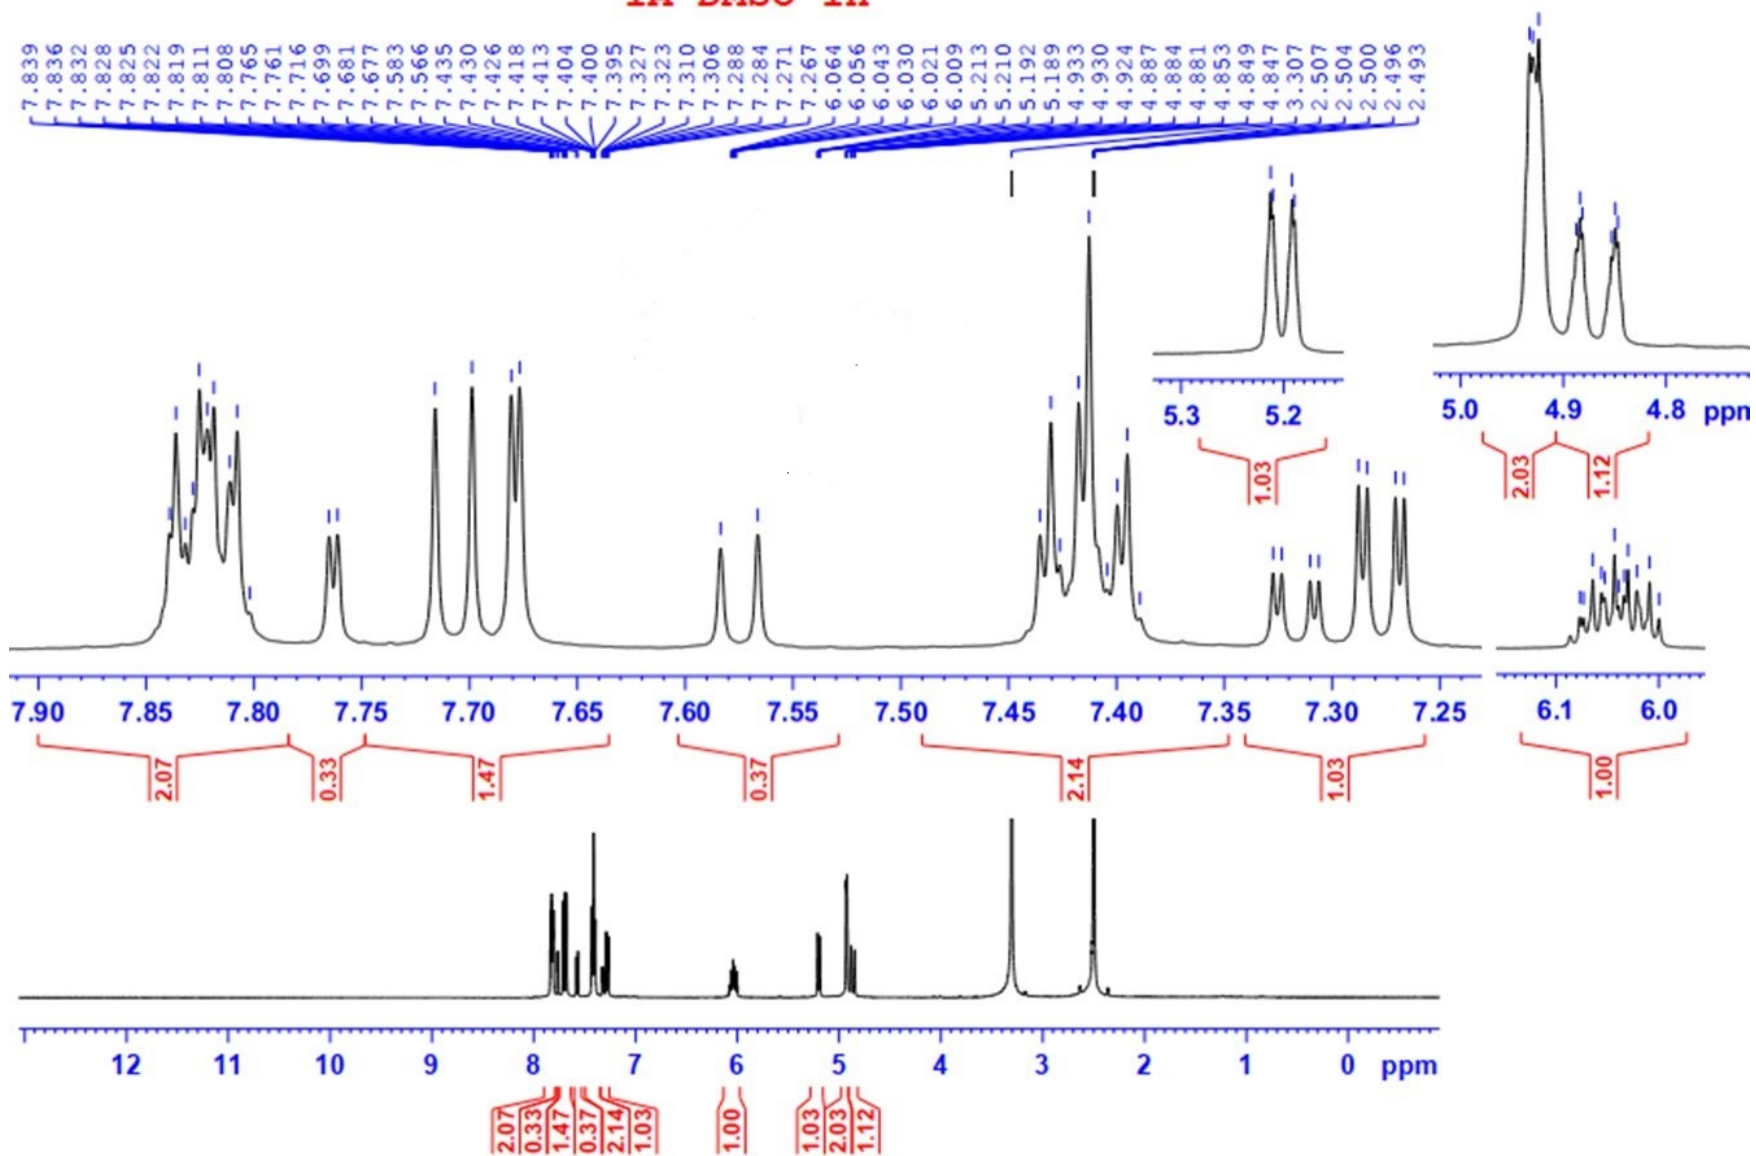

# Compound 3h

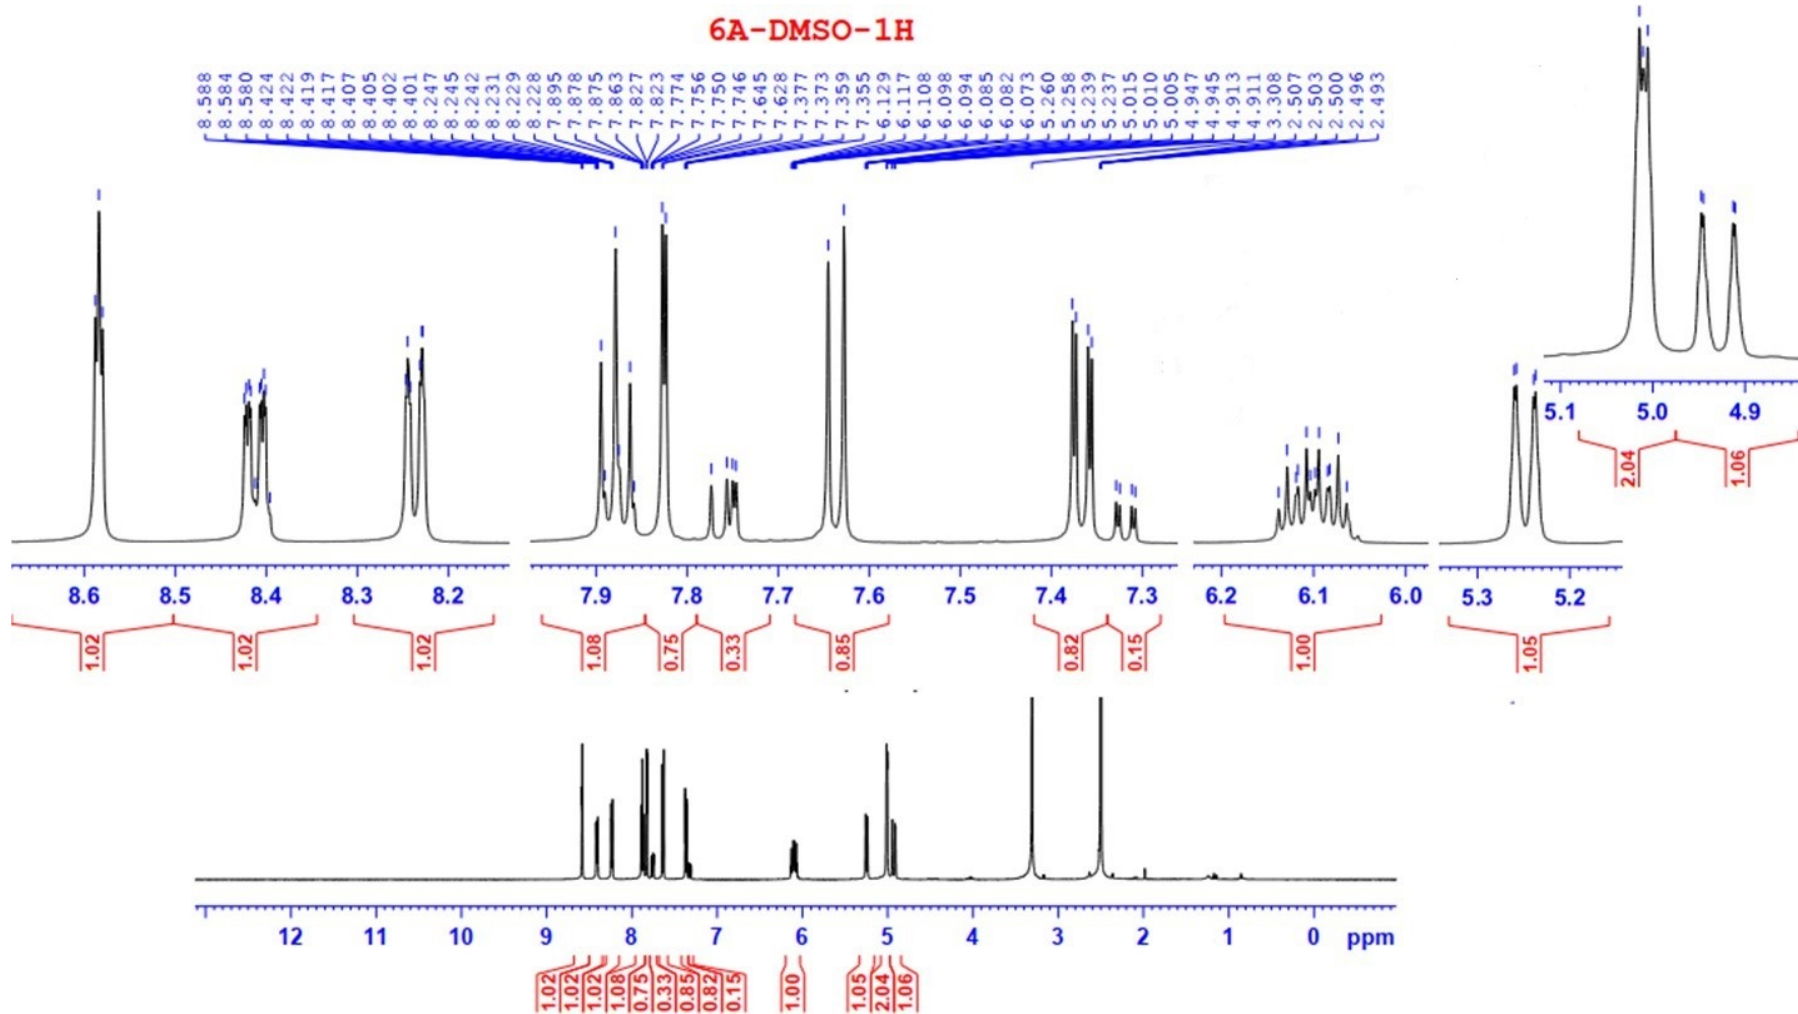

# Compound 3i

## 9A-DMSO-1H

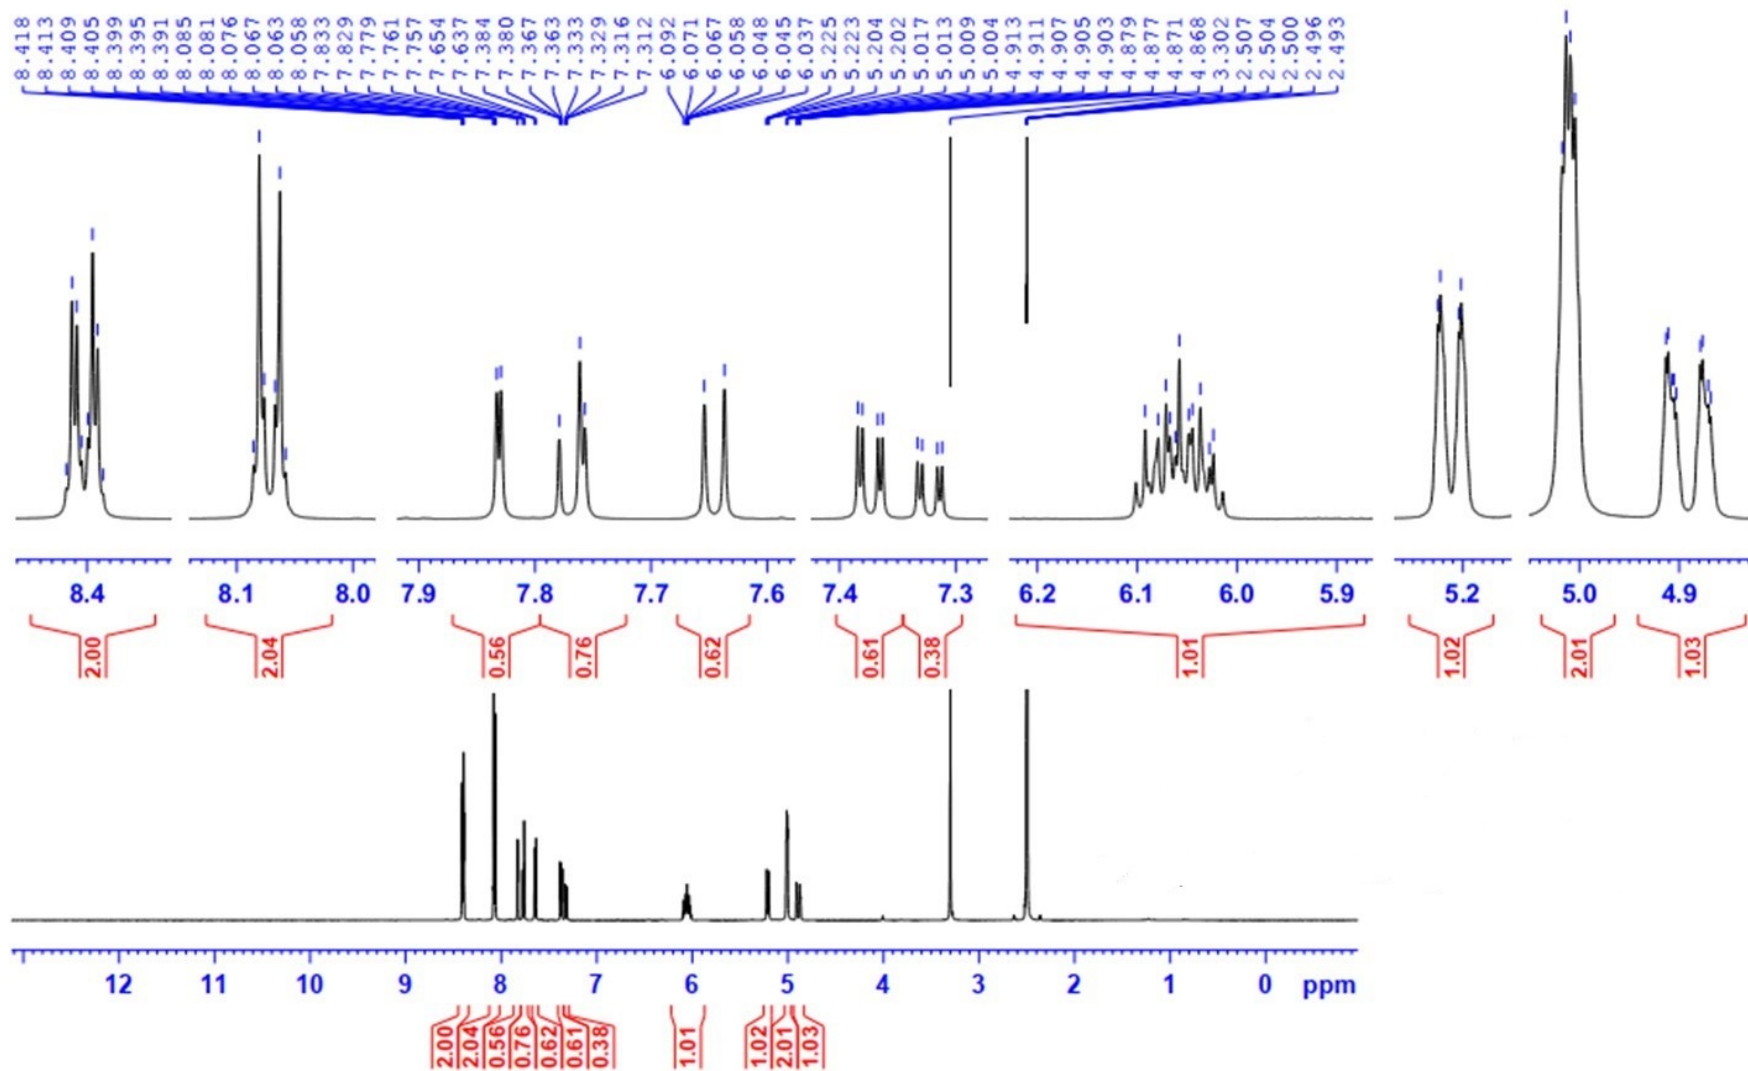

# Compound 3j

## 8B-DMSO-1H

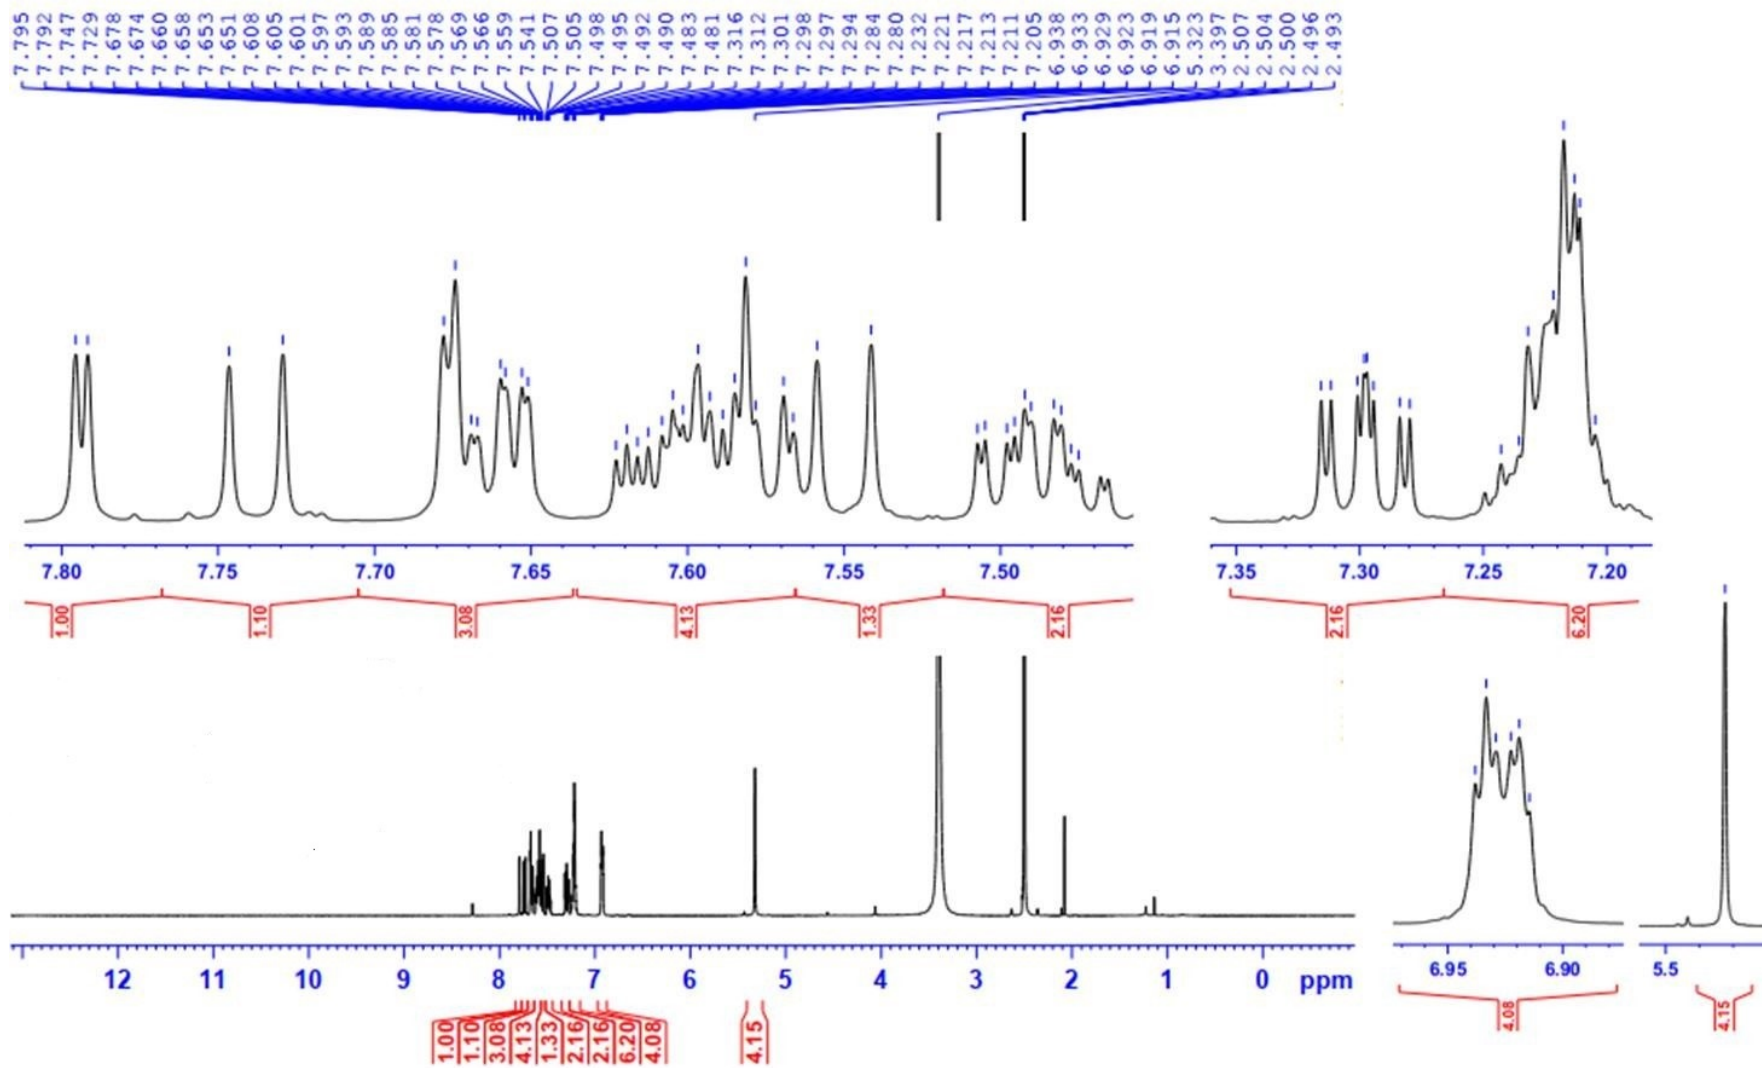

# Compound 3k

3B-DMSO-1H

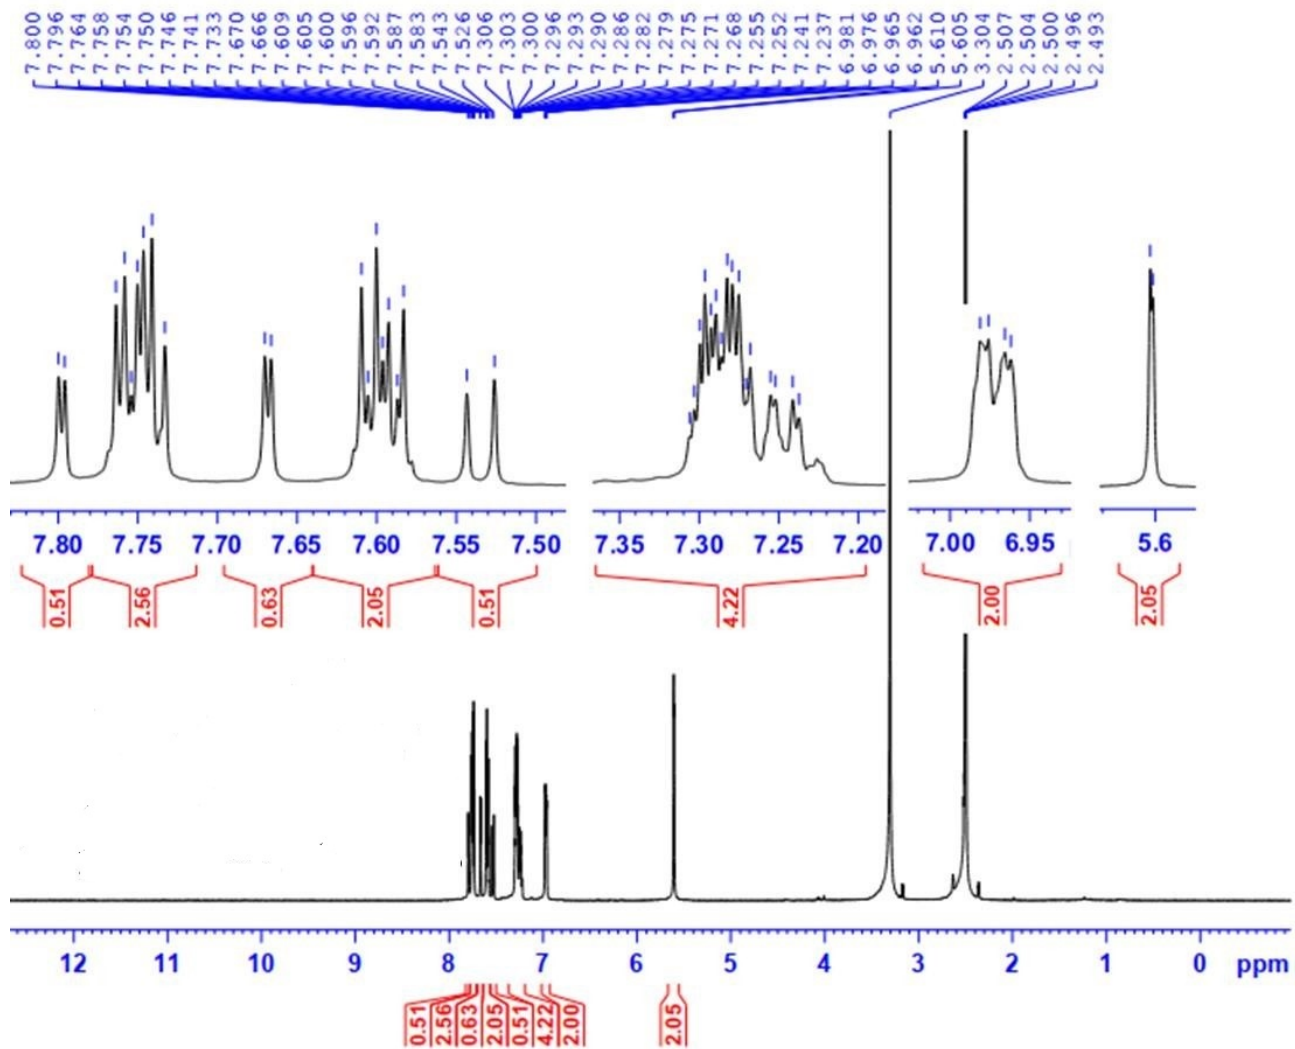

Compound 3l

2B-DMSO-1H

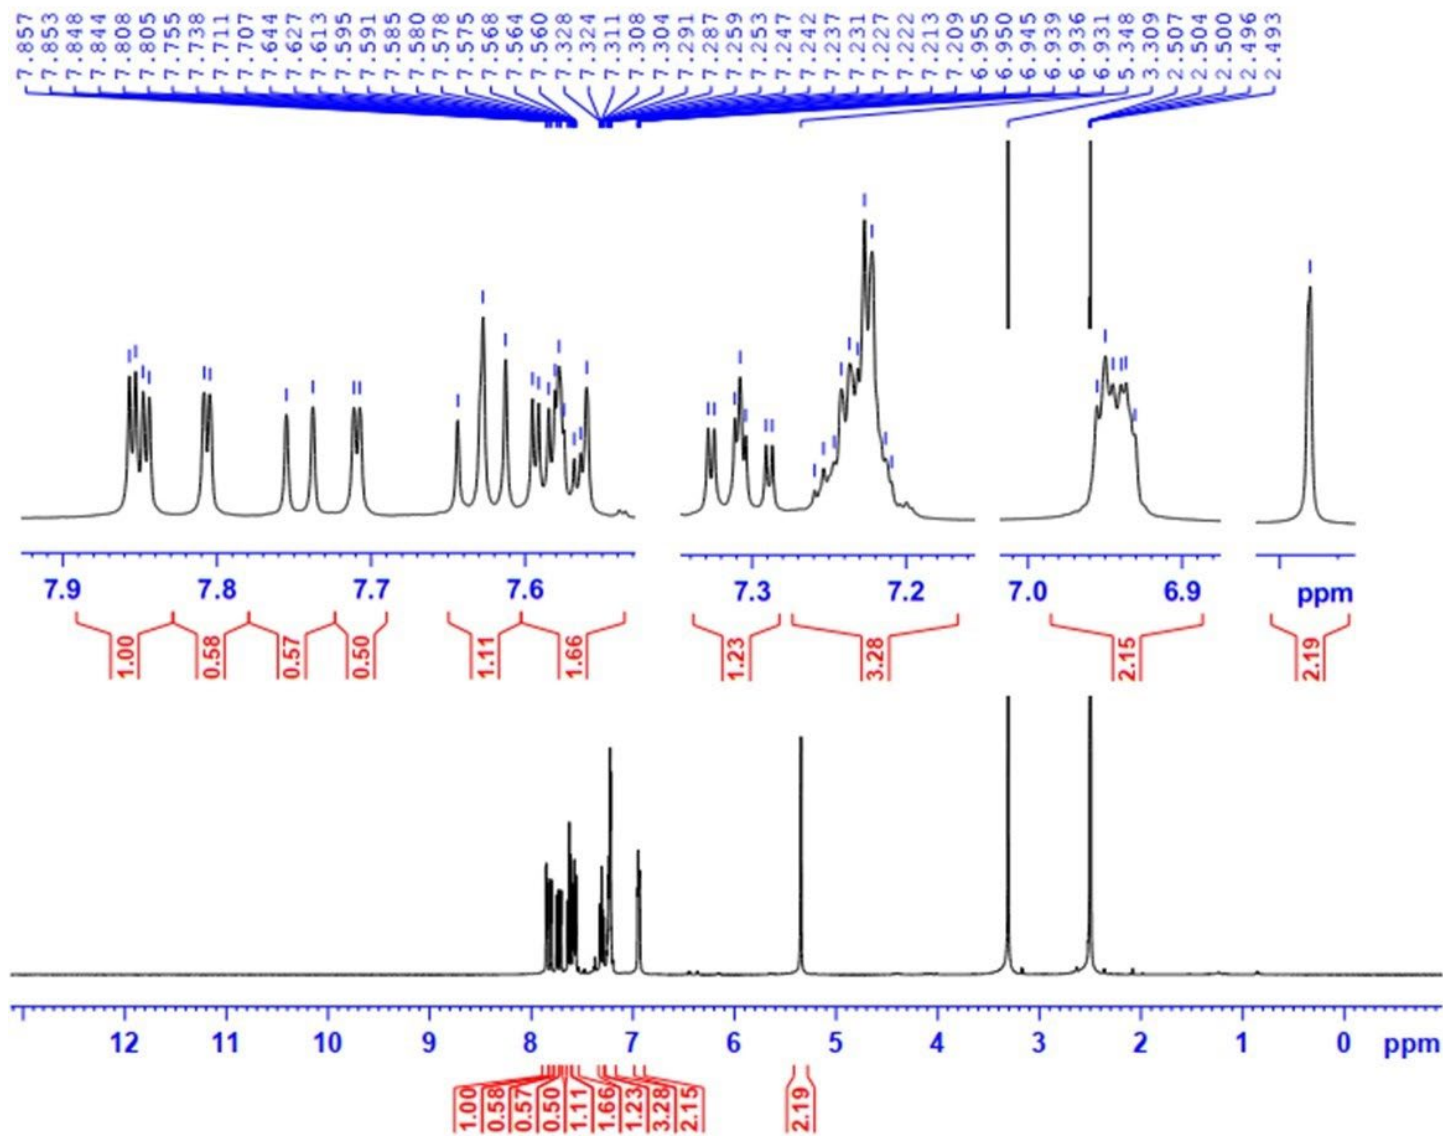



# Compound 3m

7B-DMSO-1H

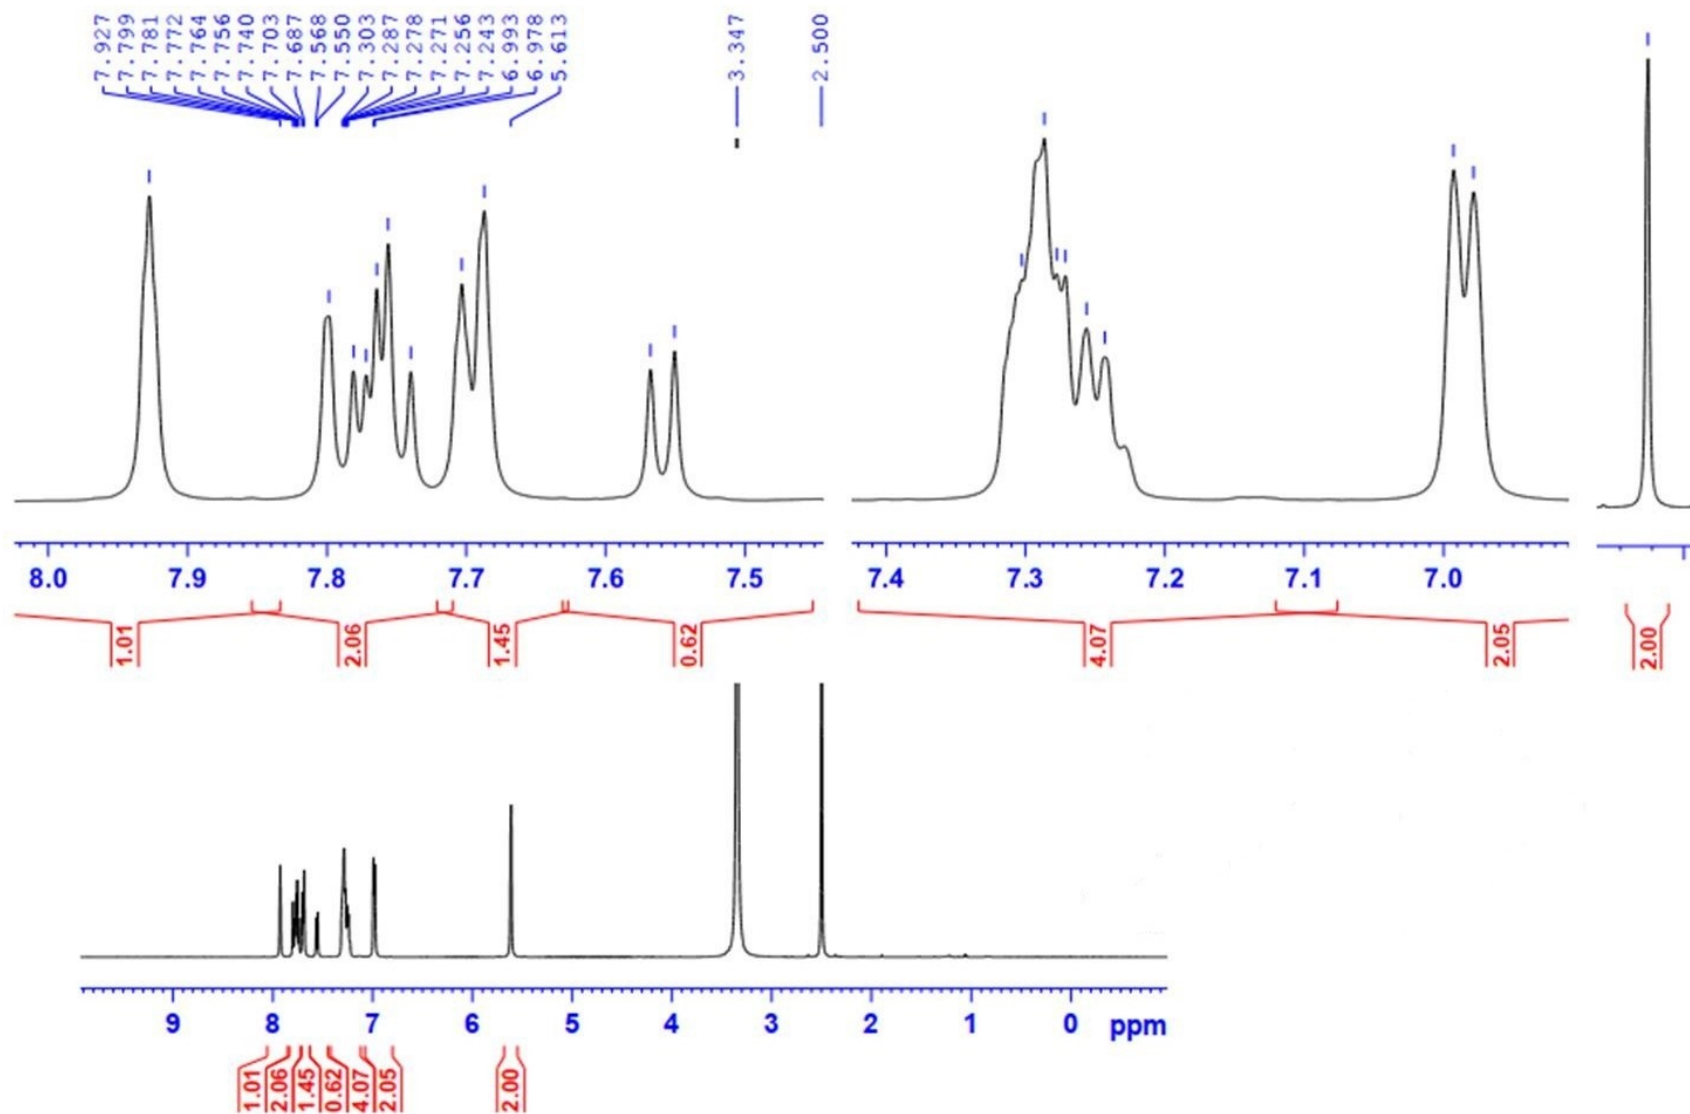

# Compound 3n

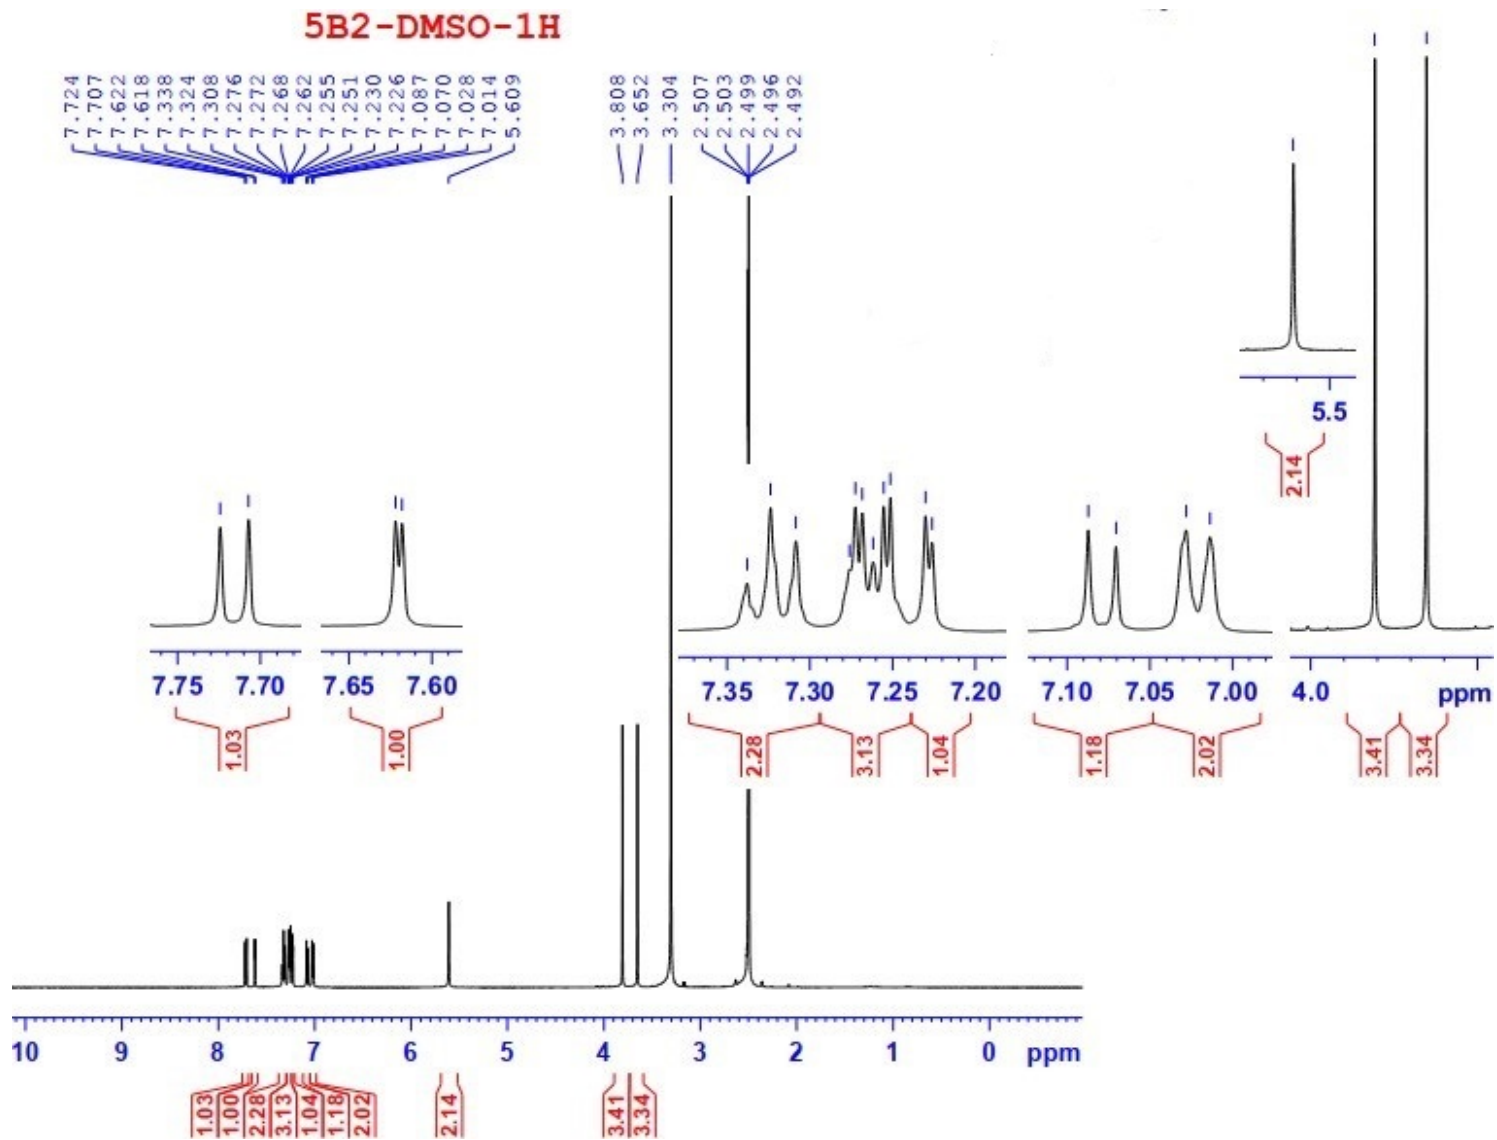



Compound 3p

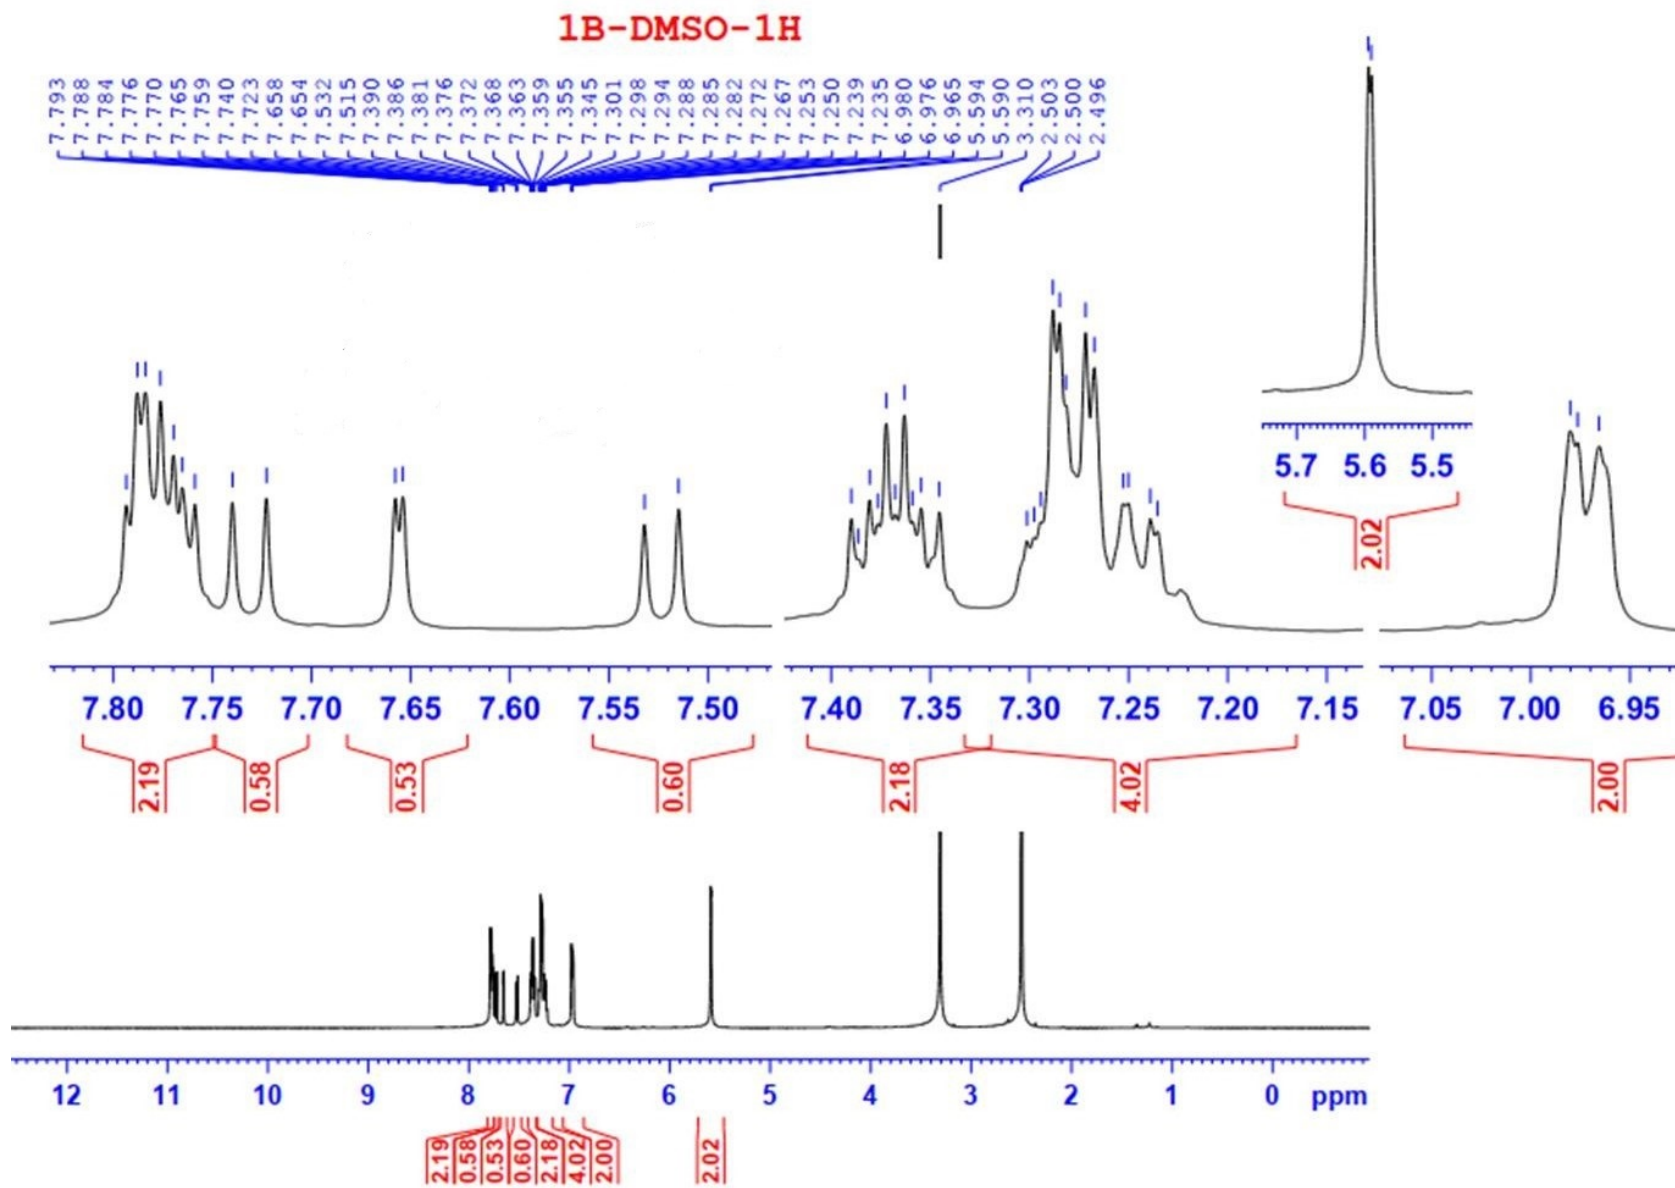

# Compound 3q

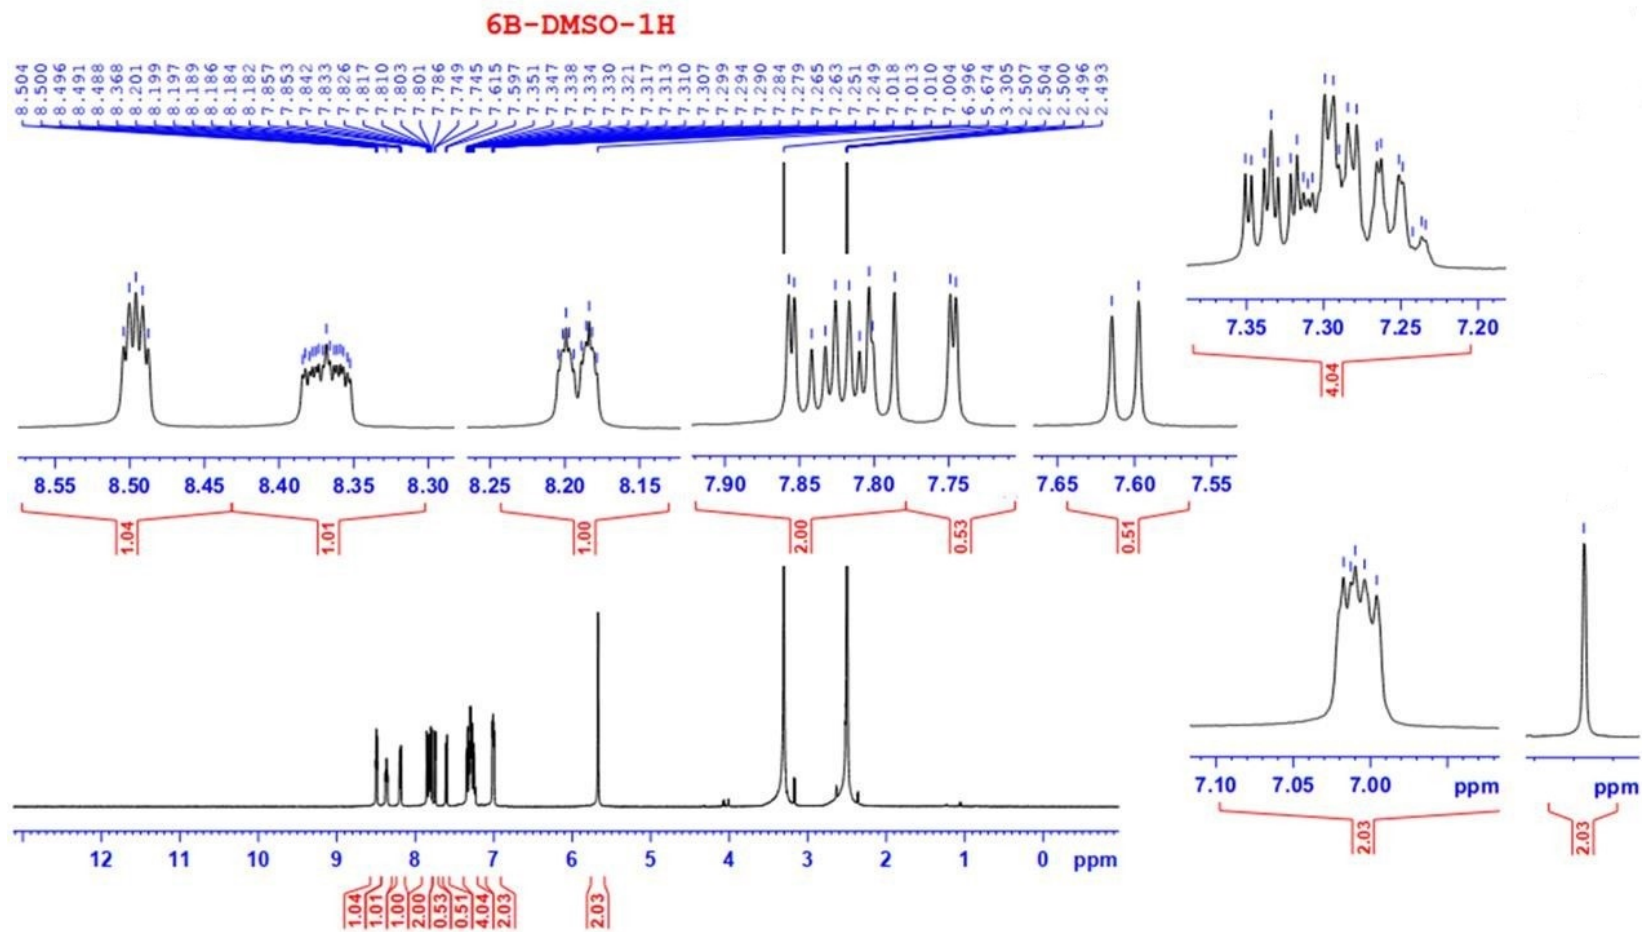

# Compound 3r

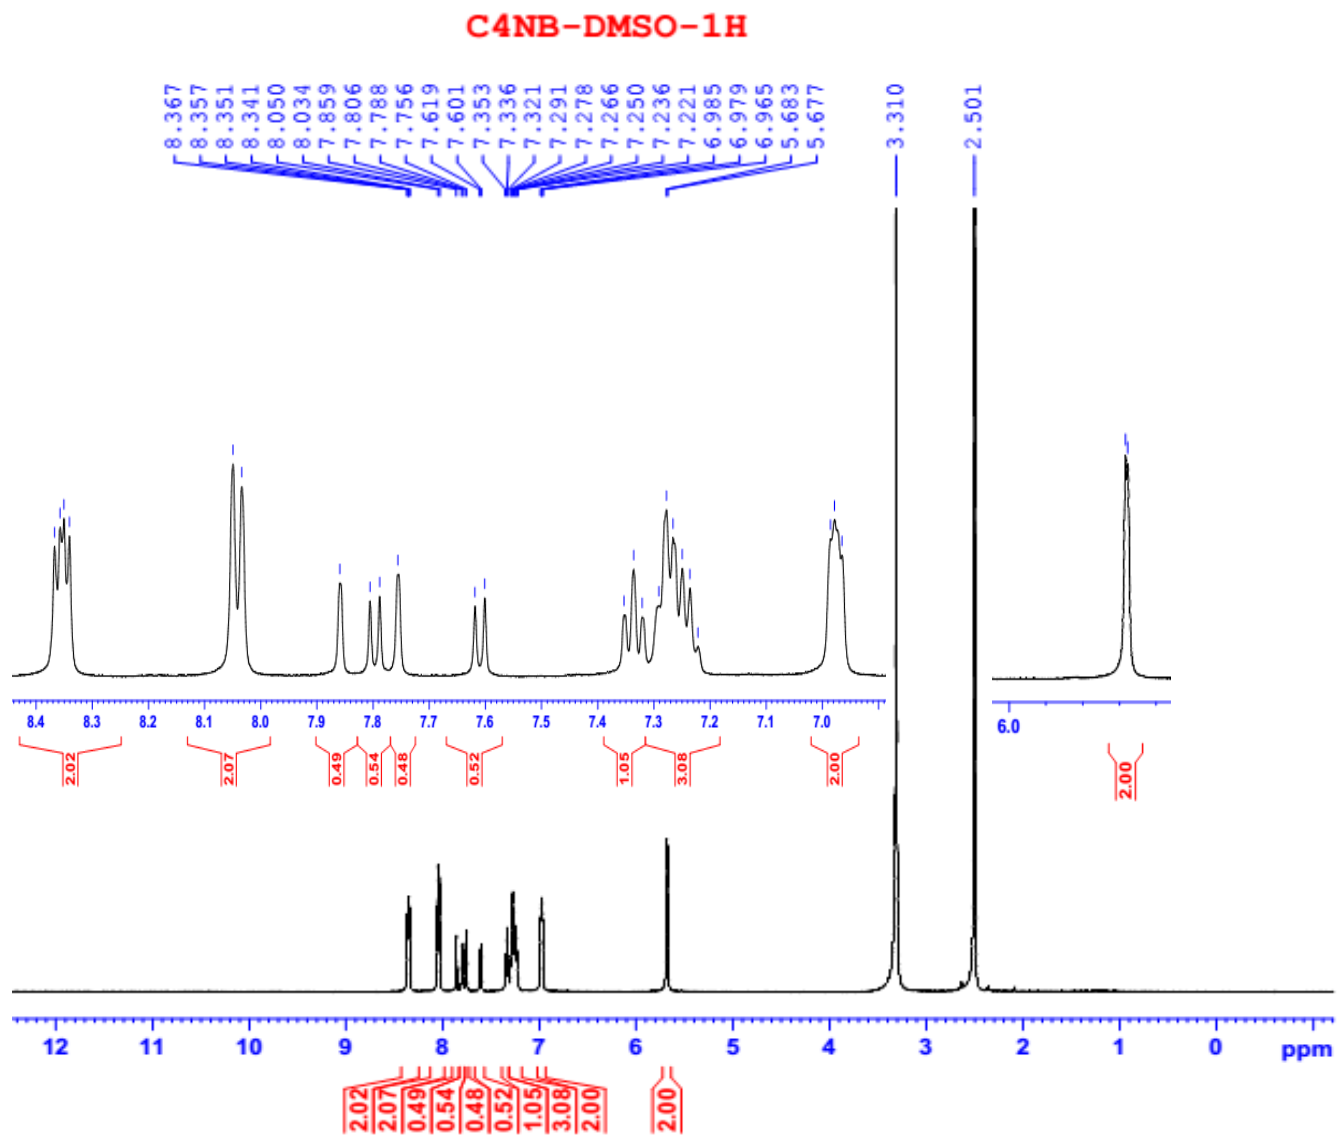

Compound 3s

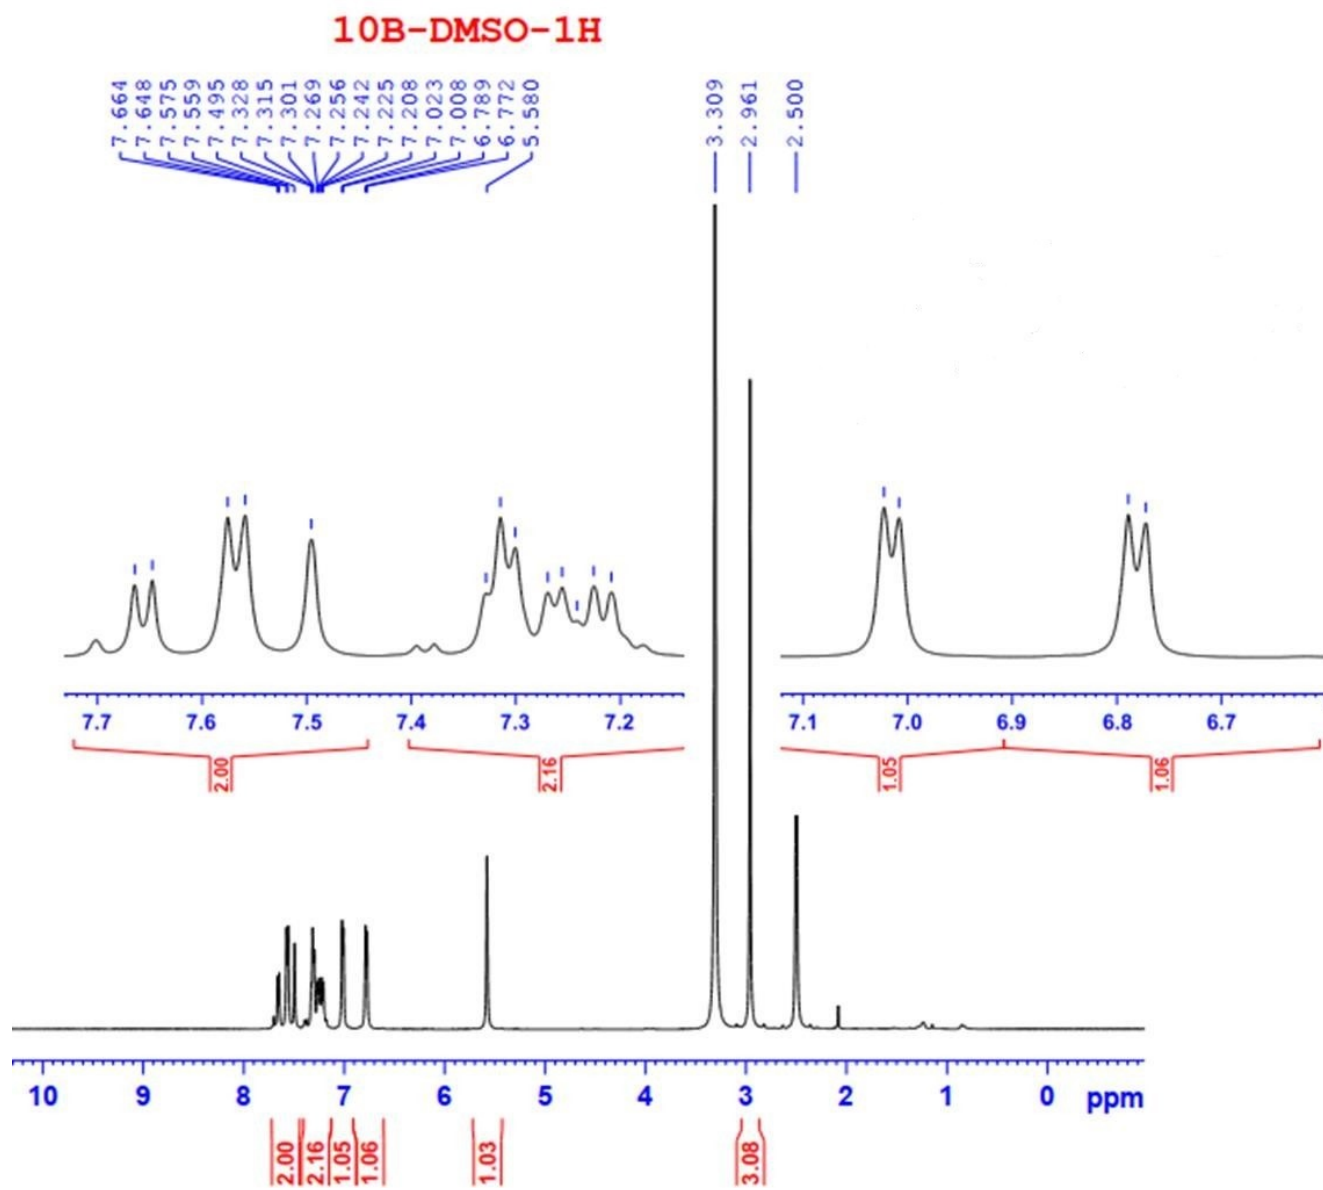

# Compound 3t

3C-DMSO-1H

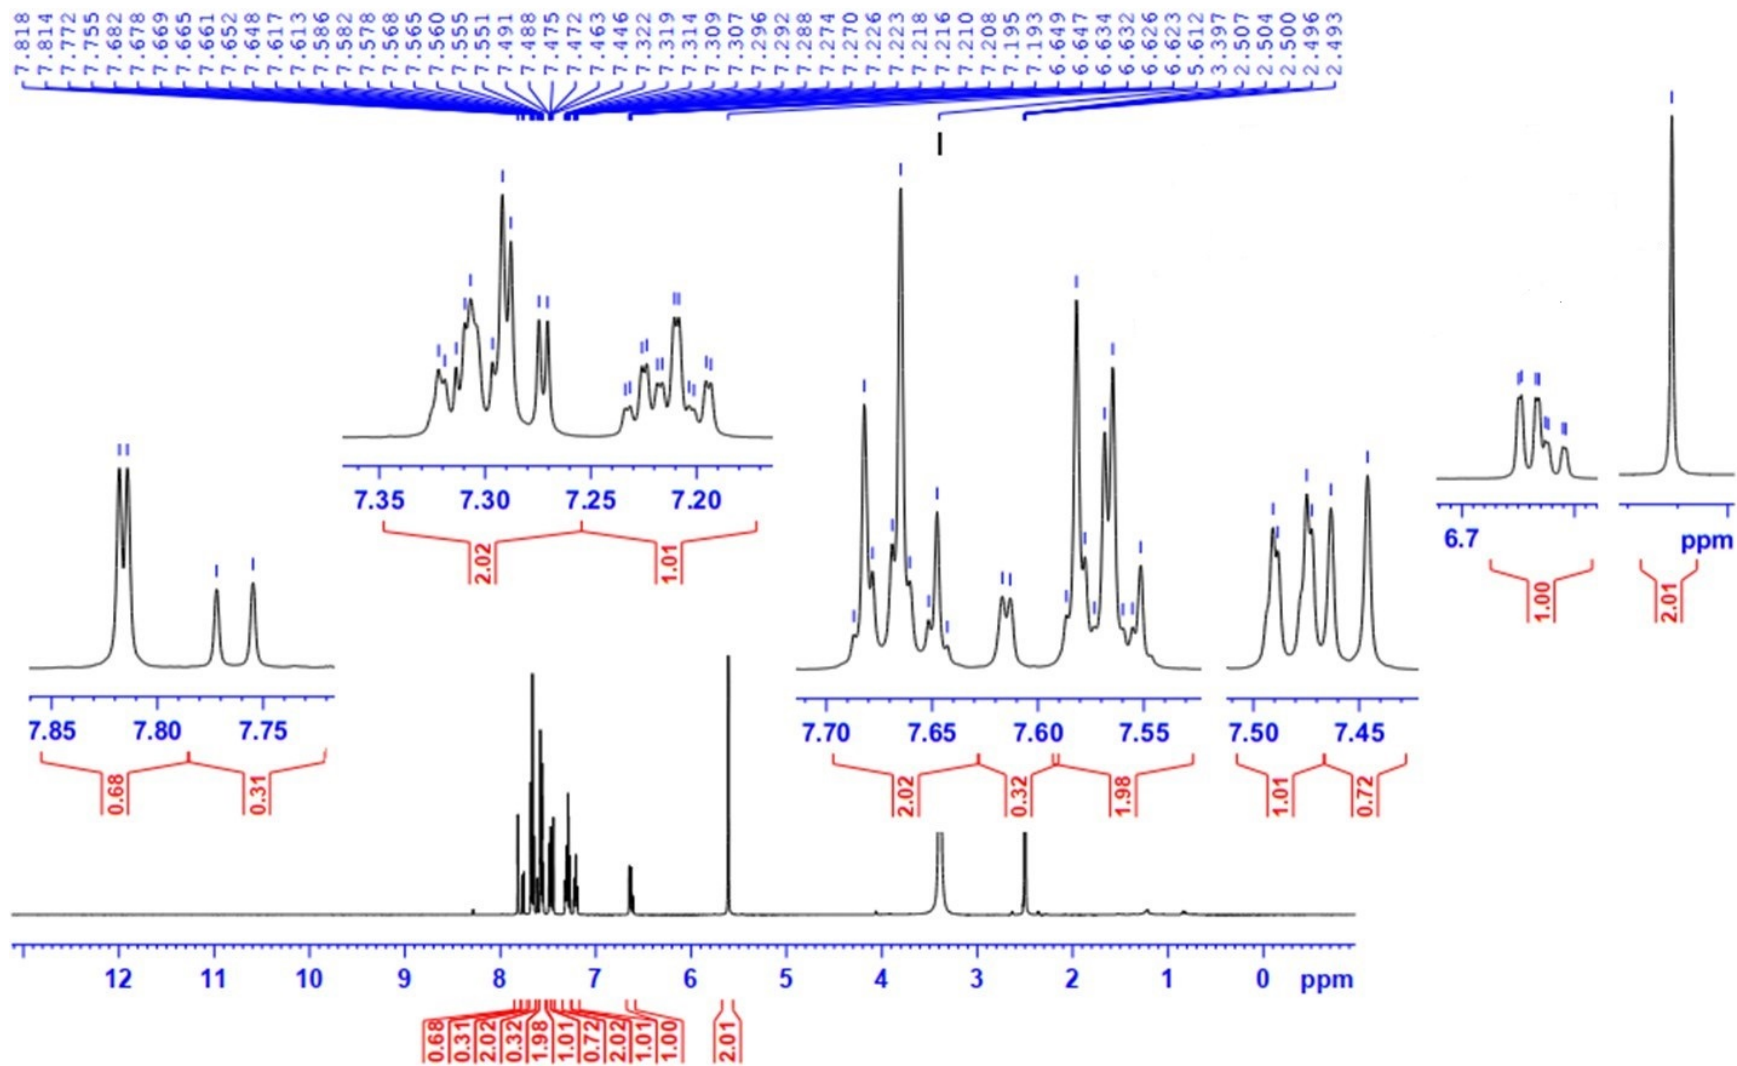



# Compound 3u

3D1-DMSO-1H

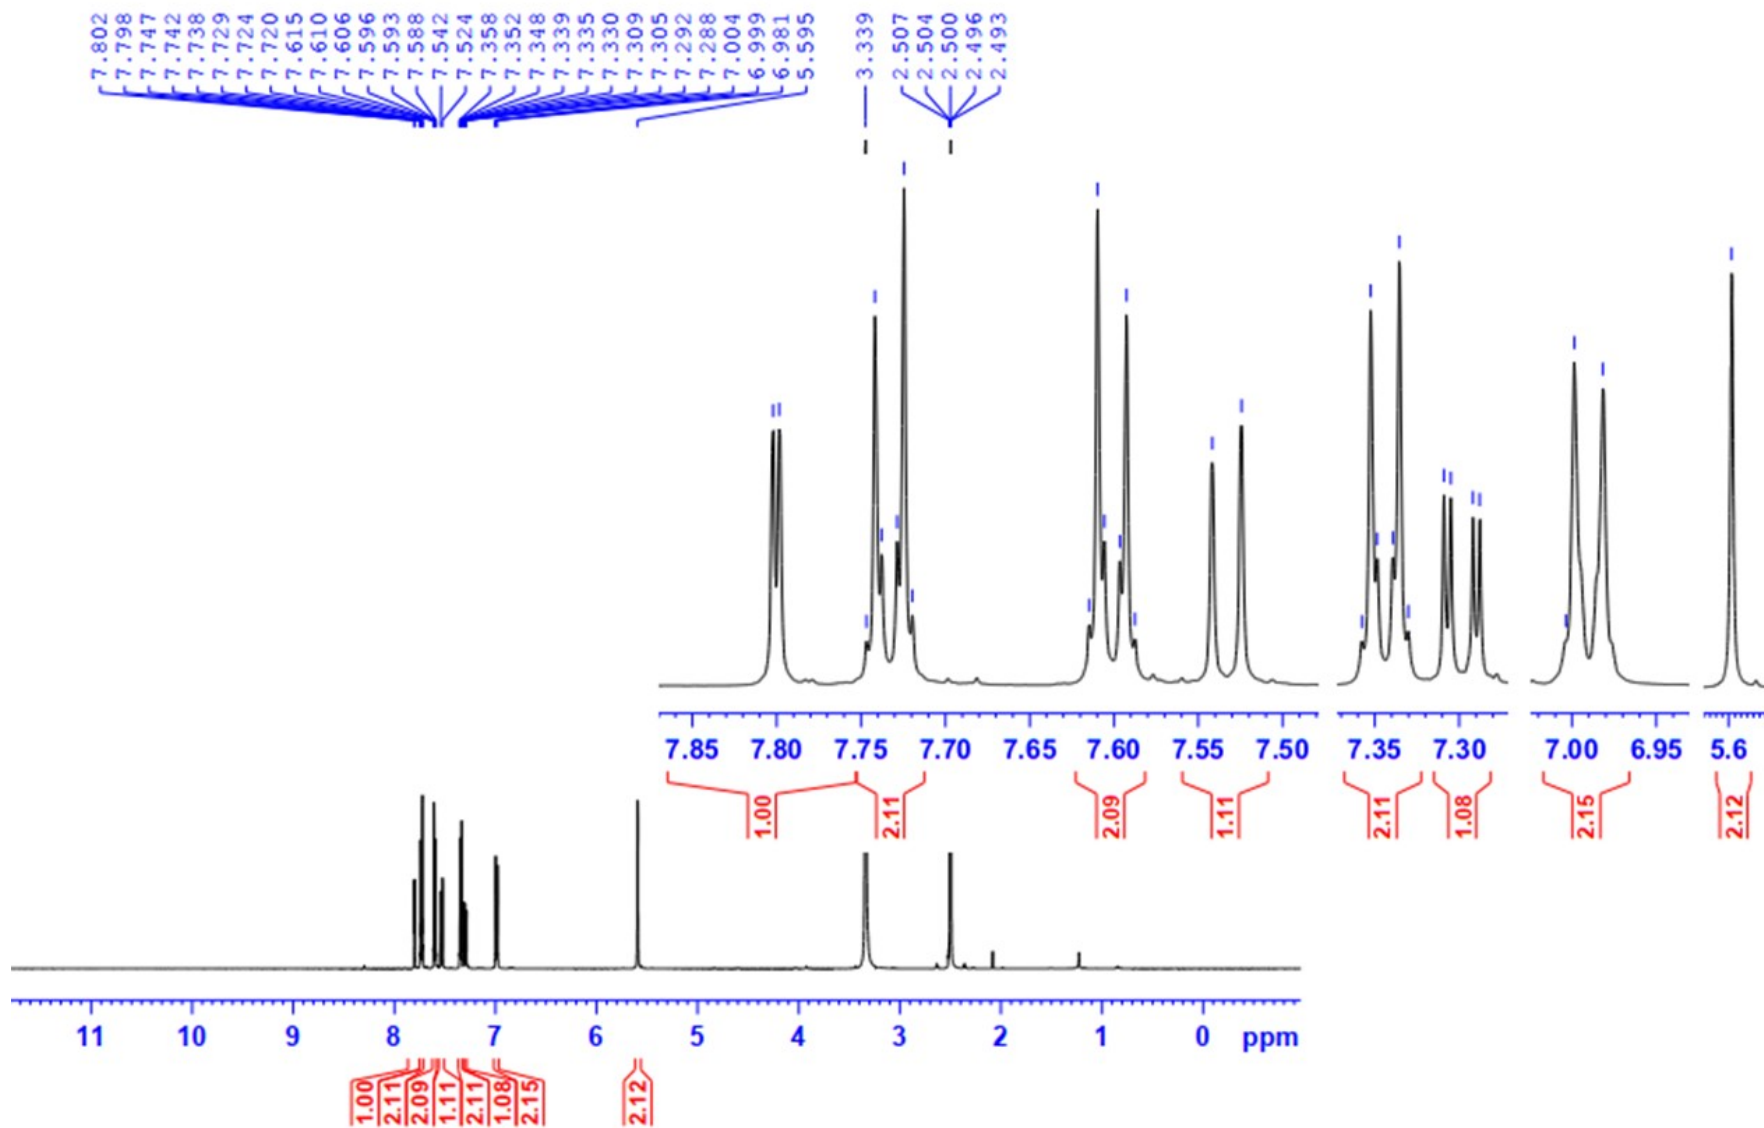

# Compound 3v

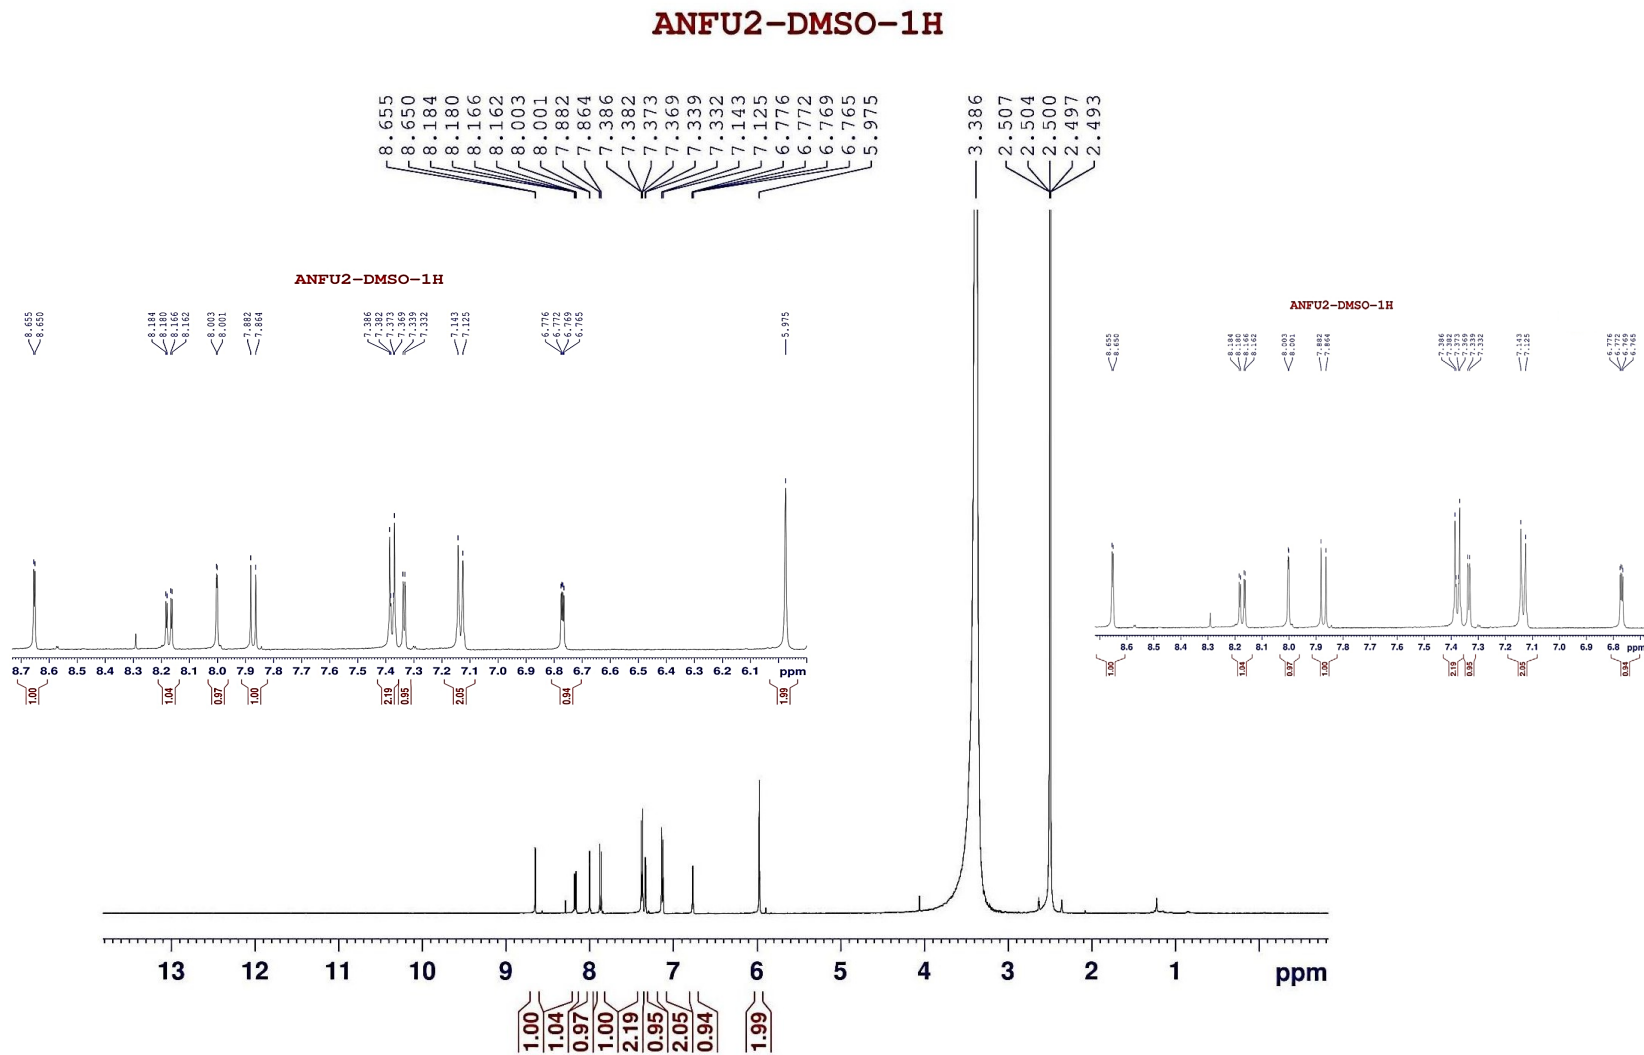

# Compound 3w

5B1-DMSO-1H

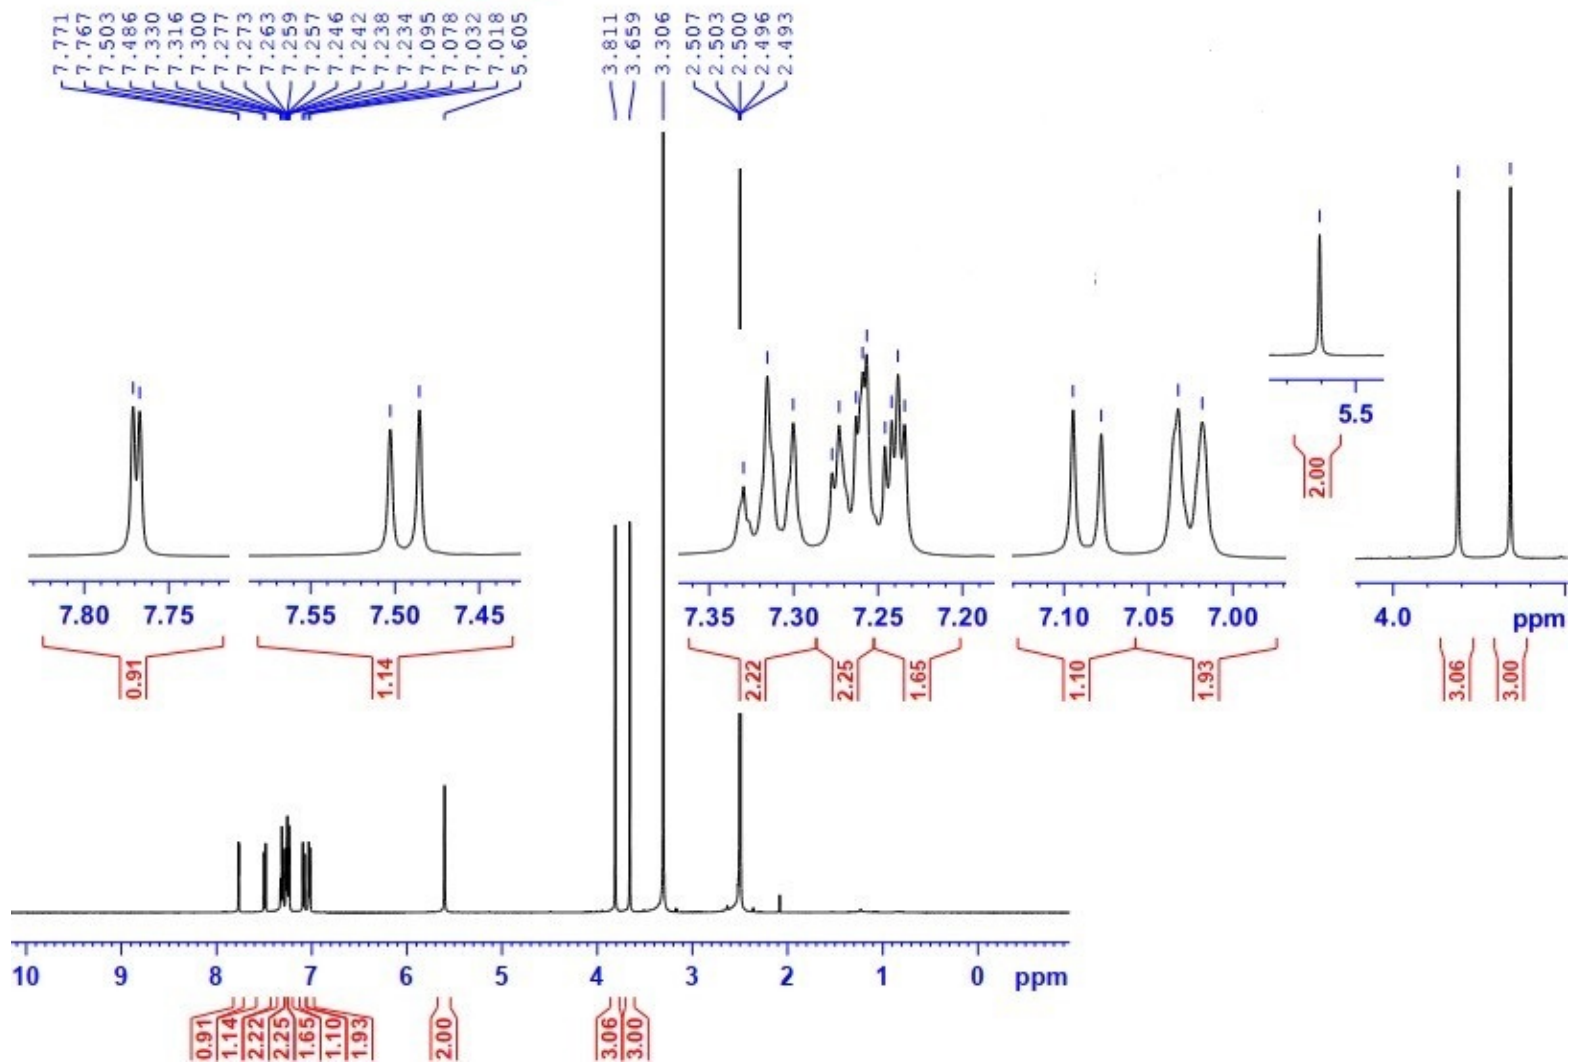

# Compound 3x

## ADME2-DMSO-1H

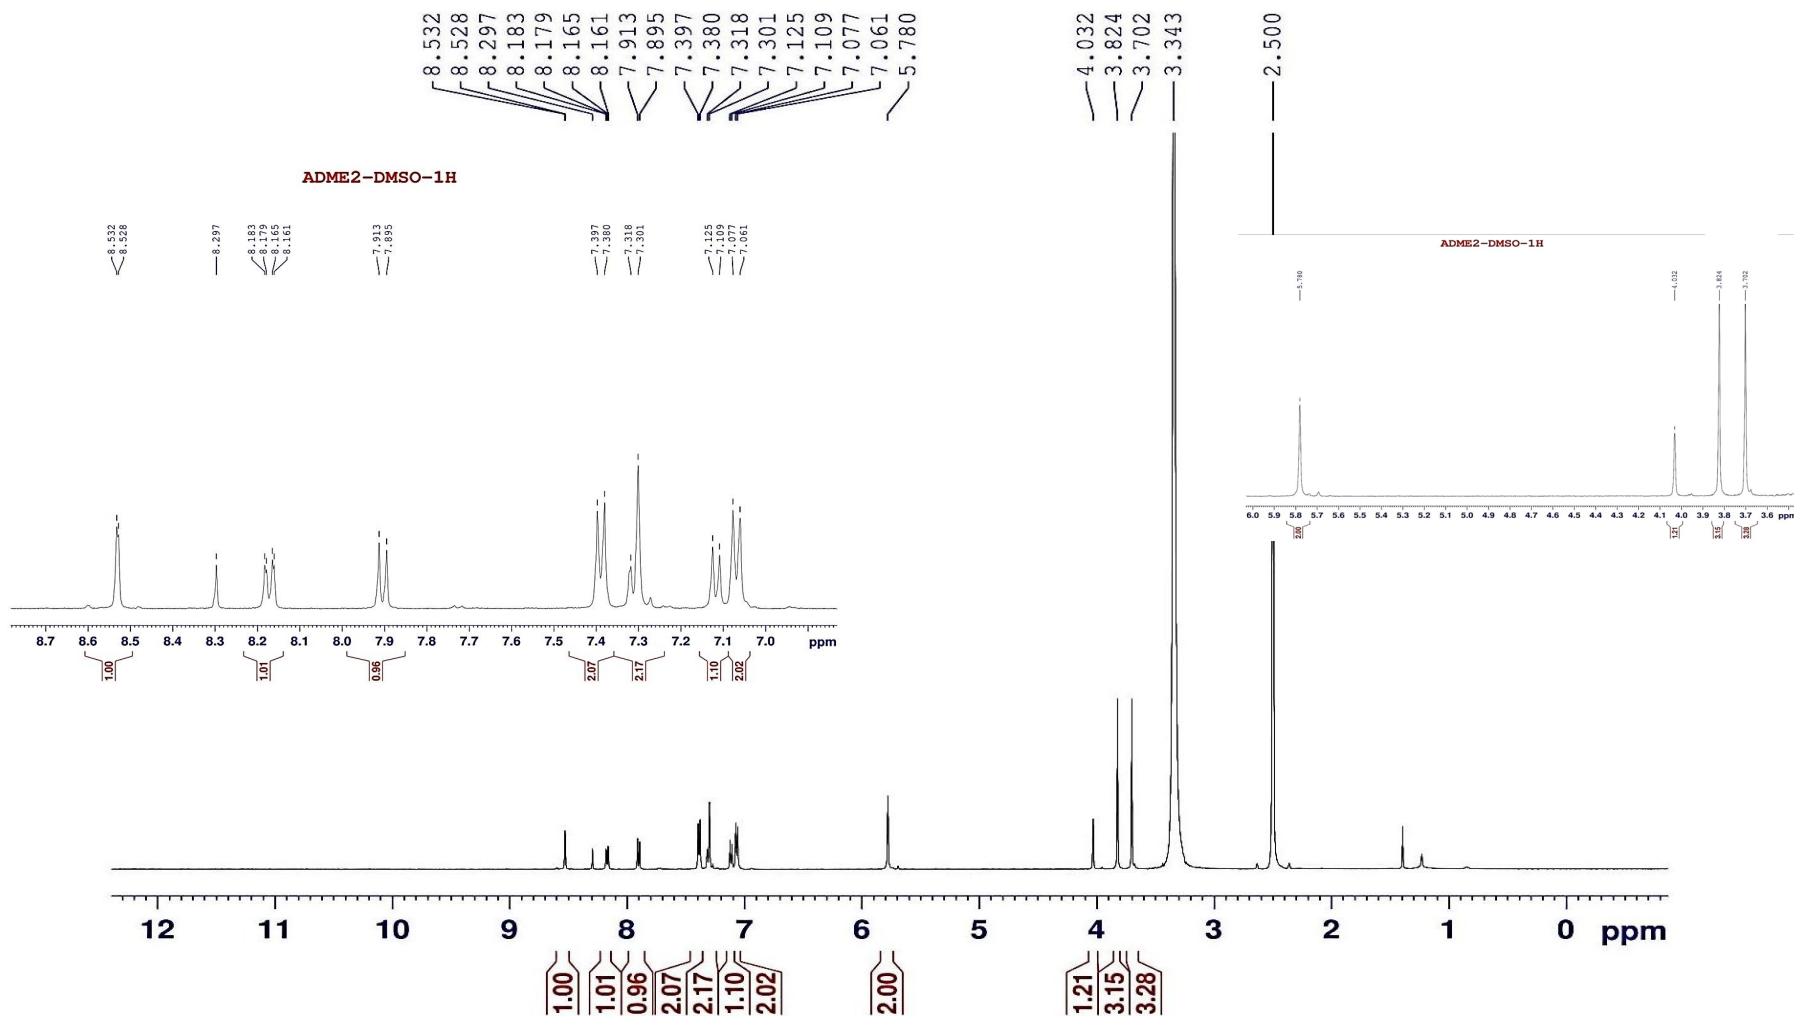

Compound 4a

24C-DMSO-1H

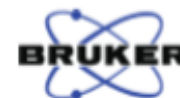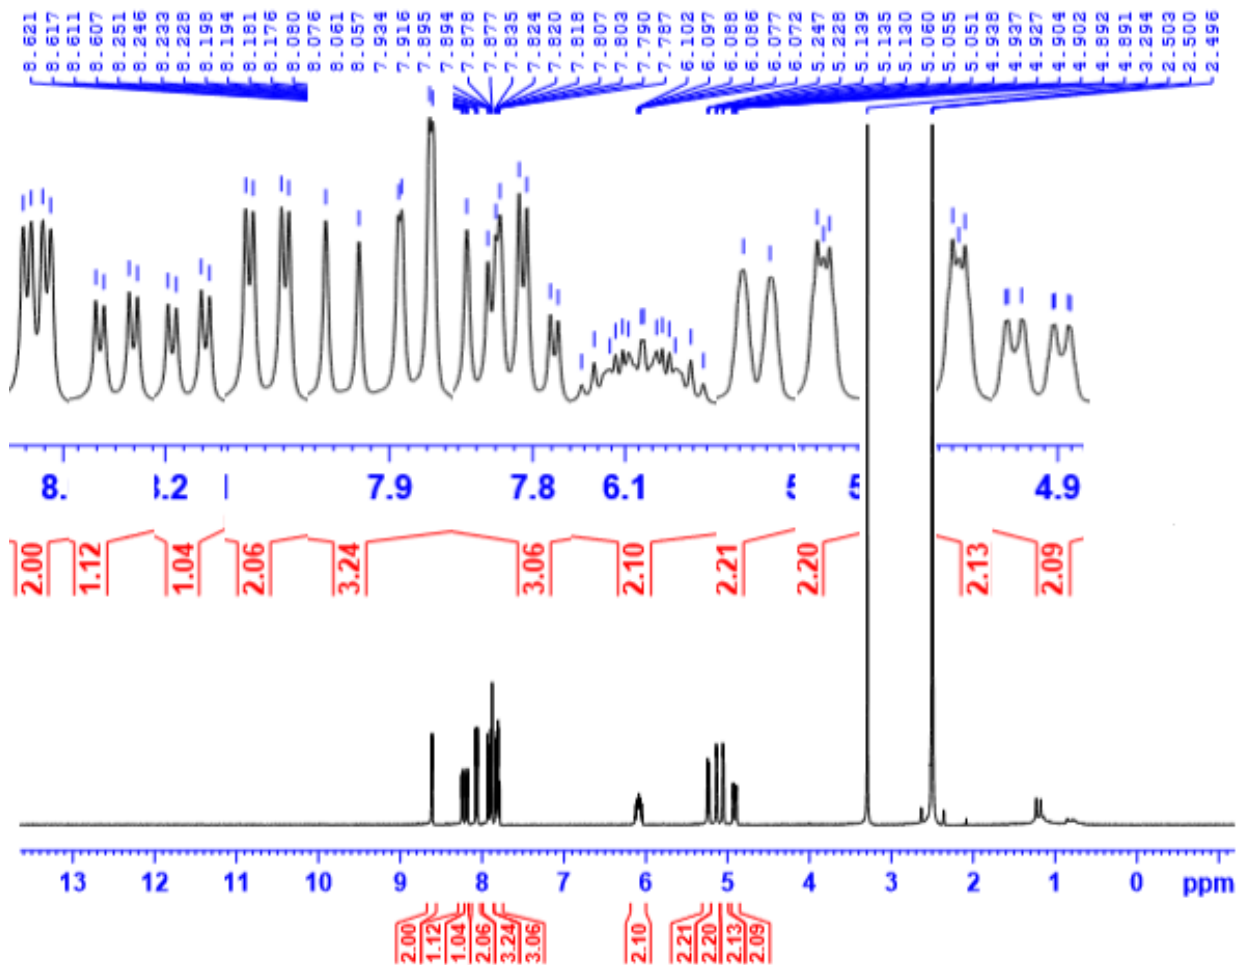

```

Current Data Parameters
NAME      1137_24C
EXPNO     1
PROCNO    1

F2 - Acquisition Parameters
Date_     20180627
Time      11.19
INSTRUM   spect
PROBHD    5 mm PABBO BB/
PULPROG   zg30
TD         65536
SOLVENT   DMSO
NS         16
DS         2
SWH        10000.000 Hz
FIDRES     0.152588 Hz
AQ         3.2767999 sec
RG         175.34
DW         50.000 usec
DE         6.50 usec
TE         304.0 K
D1         1.00000000 sec
TD0        1

----- CHANNEL f1 -----
SFO1      500.2030889 MHz
NUC1       1H
P1         10.00 usec
PLW1      22.00000000 W

F2 - Processing parameters
SI         65536
SF         500.2000053 MHz
WDW        EM
SSB        0
LB         0.30 Hz
GB         0
PC         1.00
    
```

# Compound 4b

D34C-DMSO-1H

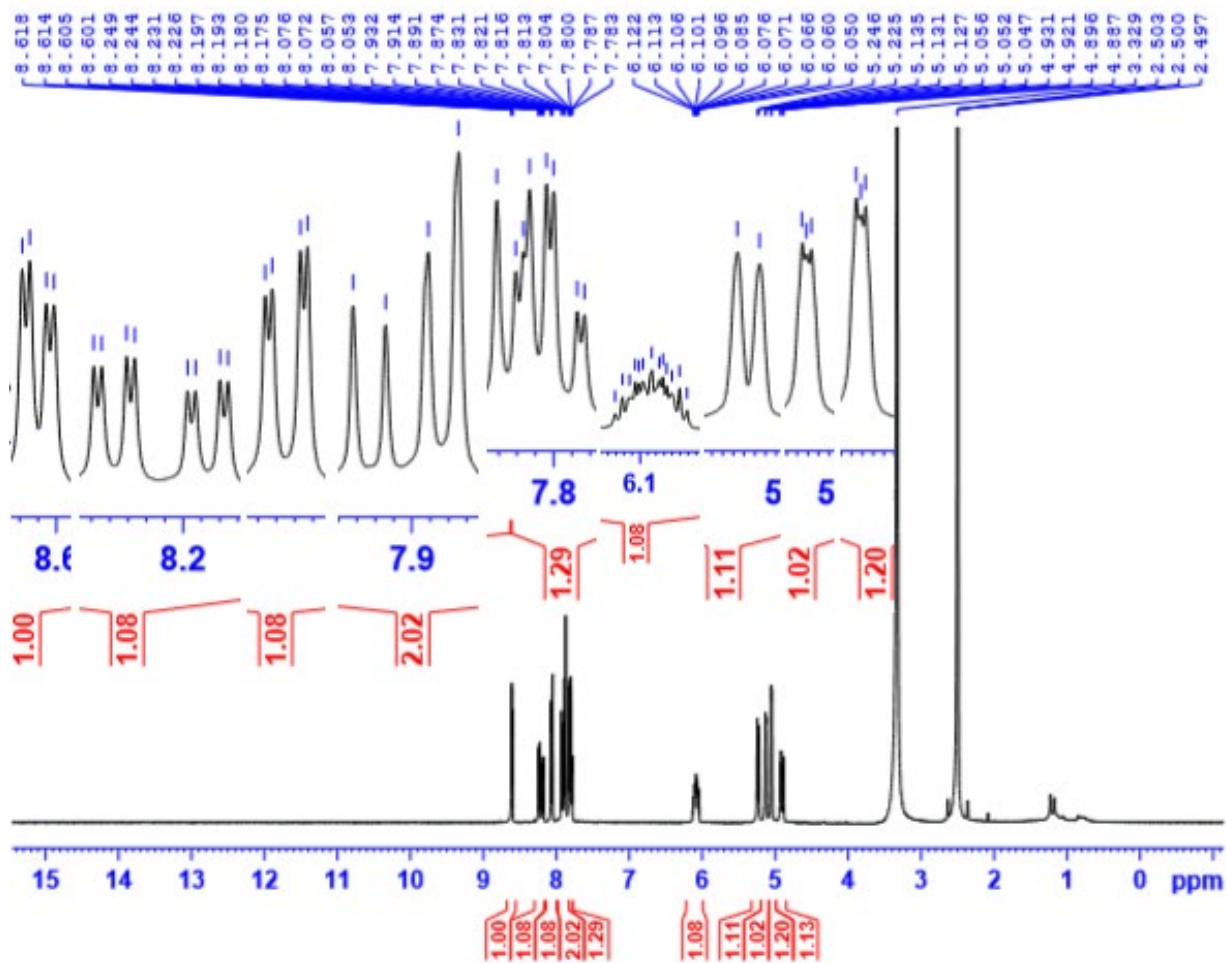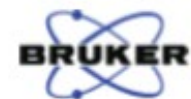

Current Data Parameters  
 NAME 113T\_D34C  
 EXNO 1  
 PROCNO 1

F2 - Acquisition Parameters  
 Date\_ 20180711  
 Time\_ 11.44  
 INSTRUM spect  
 PROCBD 5 mm PABBO BB/  
 PULPROG zg30  
 TD 65536  
 SOLVENT DMSO  
 NS 16  
 DS 2  
 SWH 10000.000 Hz  
 FIDRES 0.152588 Hz  
 AQ 3.2767999 sec  
 RG 111.89  
 DW 50.000 usec  
 DE 6.50 usec  
 TE 303.2 K  
 DL 1.00000000 sec  
 TDO 1

----- CHANNEL f1 -----  
 SFO1 500.2030889 MHz  
 NUC1 1H  
 P1 10.00 usec  
 PLW1 22.00000000 W

F2 - Processing parameters  
 SI 65536  
 SF 500.2000059 MHz  
 MDW EM  
 SSB 0  
 LB 0.30 Hz  
 GB 0  
 PC 1.00

Compound 4c

34DM-DMSO-1H

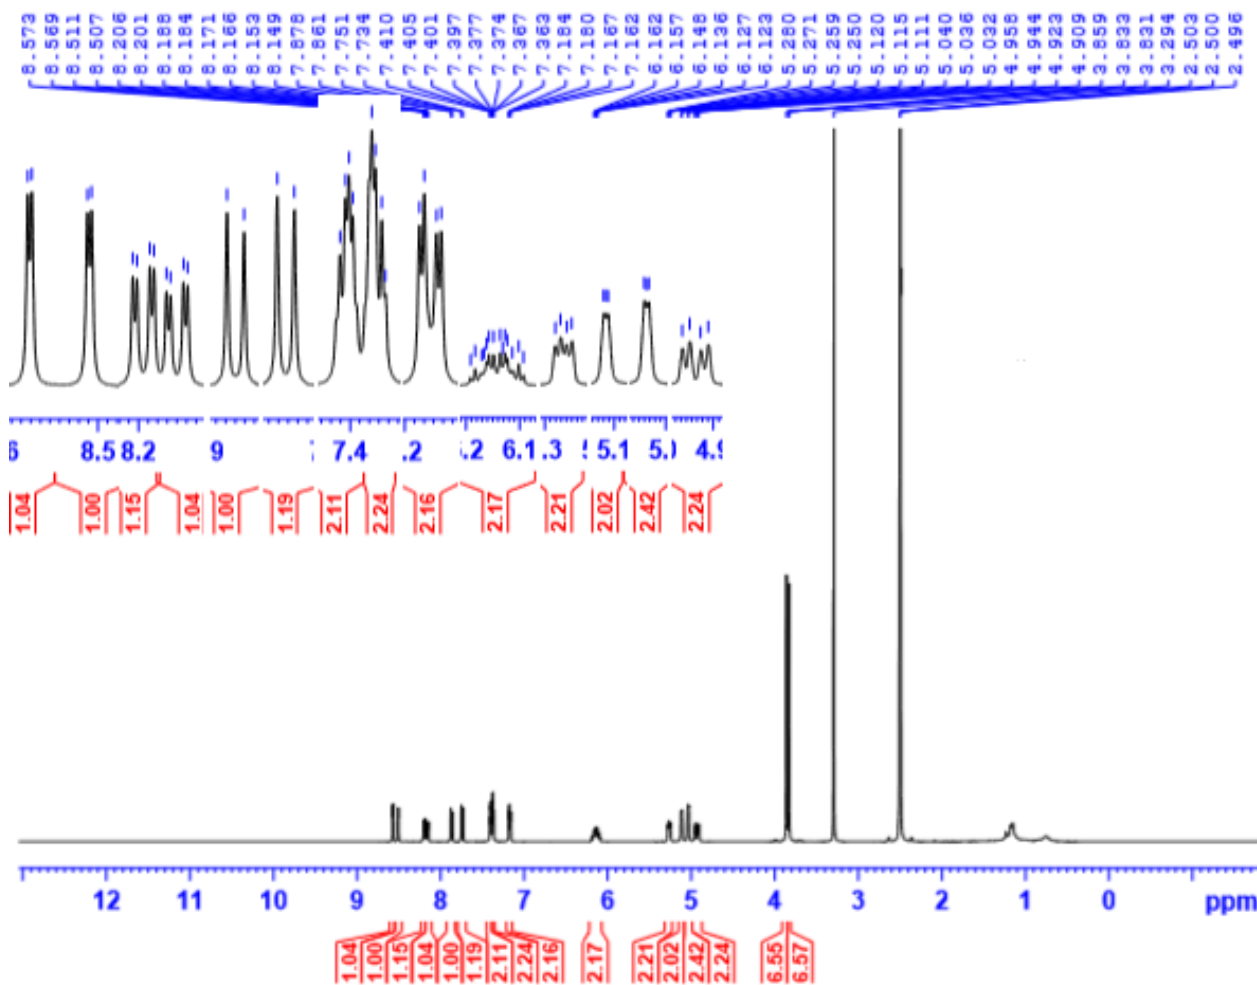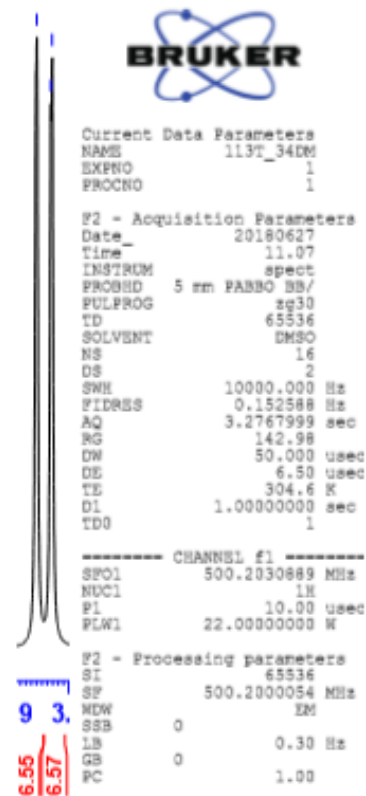

# Compound 4d

40E-DMSO-1H

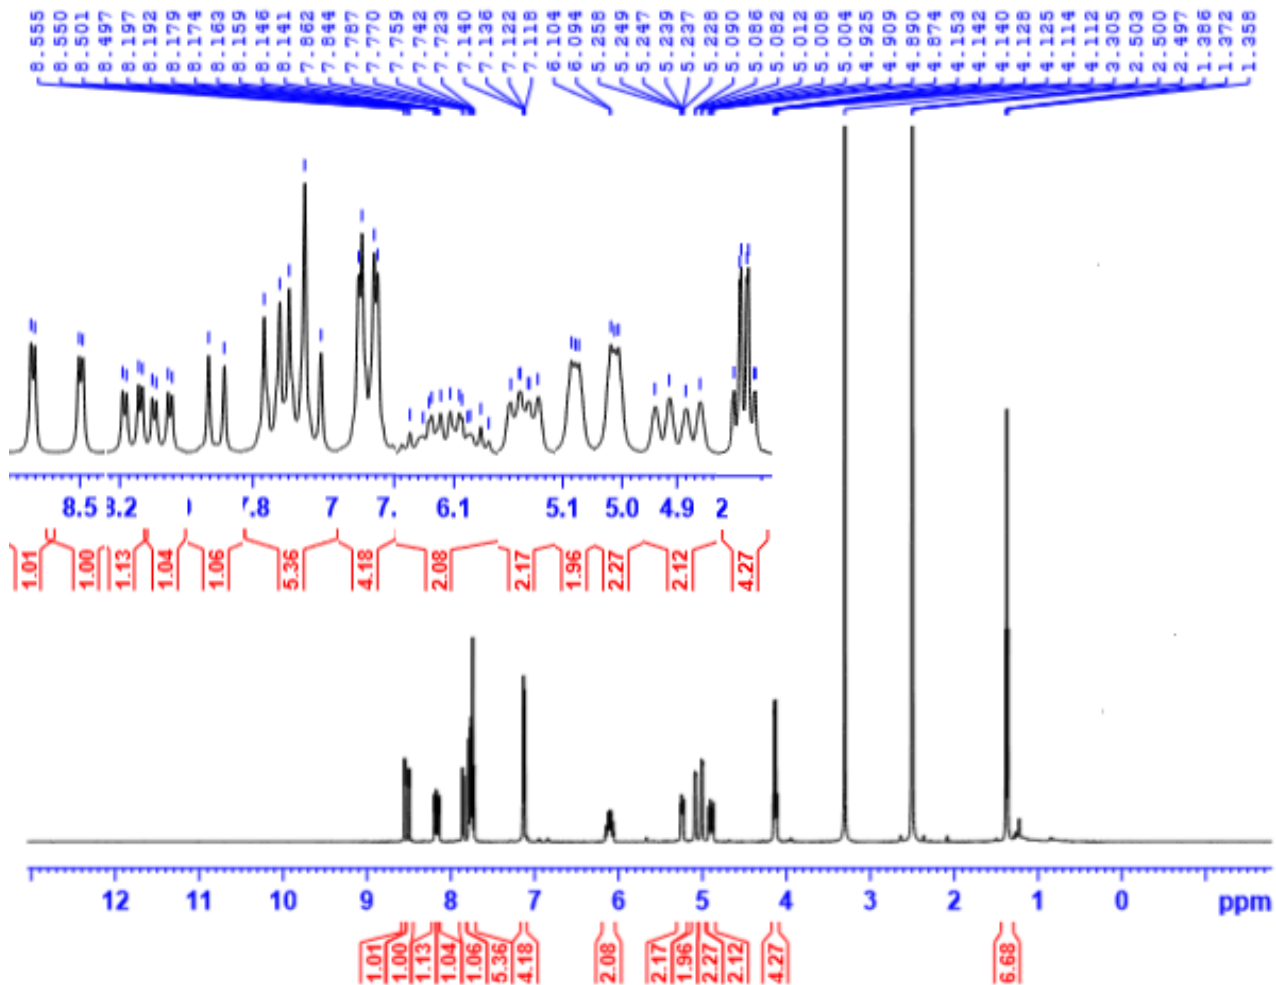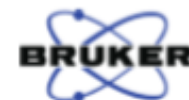

Current Data Parameters  
 NAME 1137\_40E  
 EXPNO 1  
 PROCNO 1

F2 - Acquisition Parameters  
 Date\_ 20180627  
 Time 11.23  
 INSTRUM spect  
 PROCBD 5 nm FASBO BB/  
 PULPROG zg30  
 TD 65536  
 SOLVENT DMSO  
 NS 16  
 DS 2  
 SWH 10000.000 Hz  
 FIDRES 0.152588 Hz  
 AQ 3.2767999 sec  
 RG 127.68  
 DW 50.000 usec  
 DE 6.50 usec  
 TE 303.9 K  
 D1 1.00000000 sec  
 TD0 1

CHANNEL f1  
 SFO1 500.2030889 MHz  
 NUC1 1H  
 P1 10.00 usec  
 PLW1 22.00000000 W

F2 - Processing parameters  
 SI 65536  
 SF 500.2000051 MHz  
 MDW EM  
 SSB 0  
 LB 0.30 Hz  
 GB 0  
 PC 1.00



# Compound 4e

4F-DMSO-1H

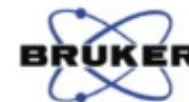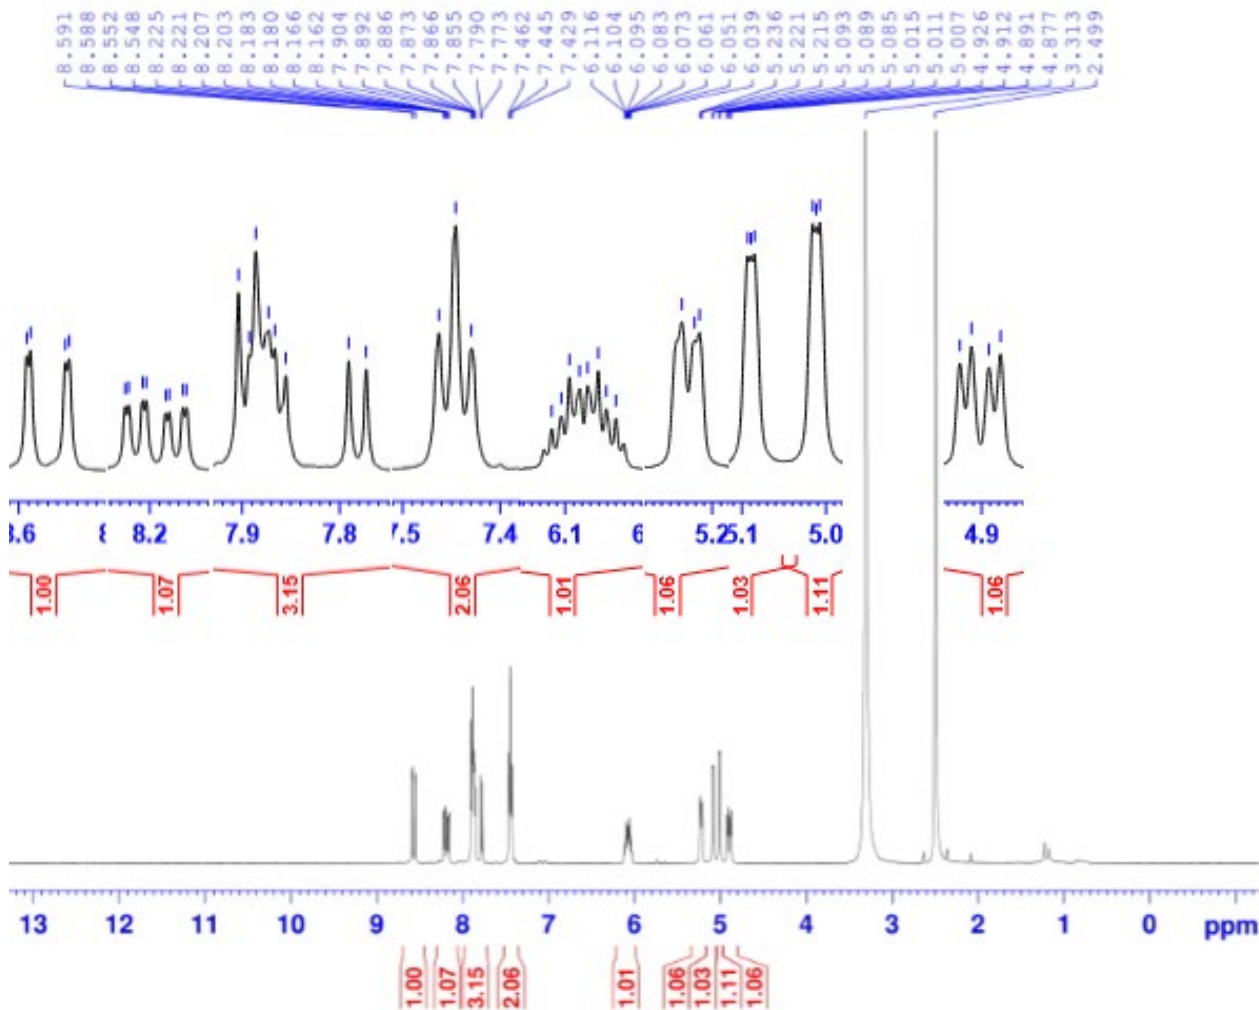

Current Data Parameters  
 NAME 113T\_4F  
 EXPNO 1  
 PROCNO 1

F2 - Acquisition Parameters  
 Date\_ 20180627  
 Time 10.39  
 INSTRUM spect  
 PROBHD 5 mm PABBO BB/  
 PULPROG zg30  
 TD 65536  
 SOLVENT DMSO  
 NS 16  
 DS 2  
 SWH 10000.000 Hz  
 FIDRES 0.152588 Hz  
 AQ 3.2767999 sec  
 RG 97.76  
 DW 50.000 usec  
 DE 6.50 usec  
 TE 309.7 K  
 D1 1.00000000 sec  
 TD0 1

----- CHANNEL f1 -----  
 SFO1 500.2030889 MHz  
 NUC1 1H  
 P1 10.00 usec  
 PLW1 22.00000000 W

F2 - Processing parameters  
 SI 65536  
 SF 500.2000053 MHz  
 WDW EM  
 SSB 0  
 LB 0.30 Hz  
 GB 0  
 PC 1.00

# Compound 4f

## DNCC-DMSO-1H

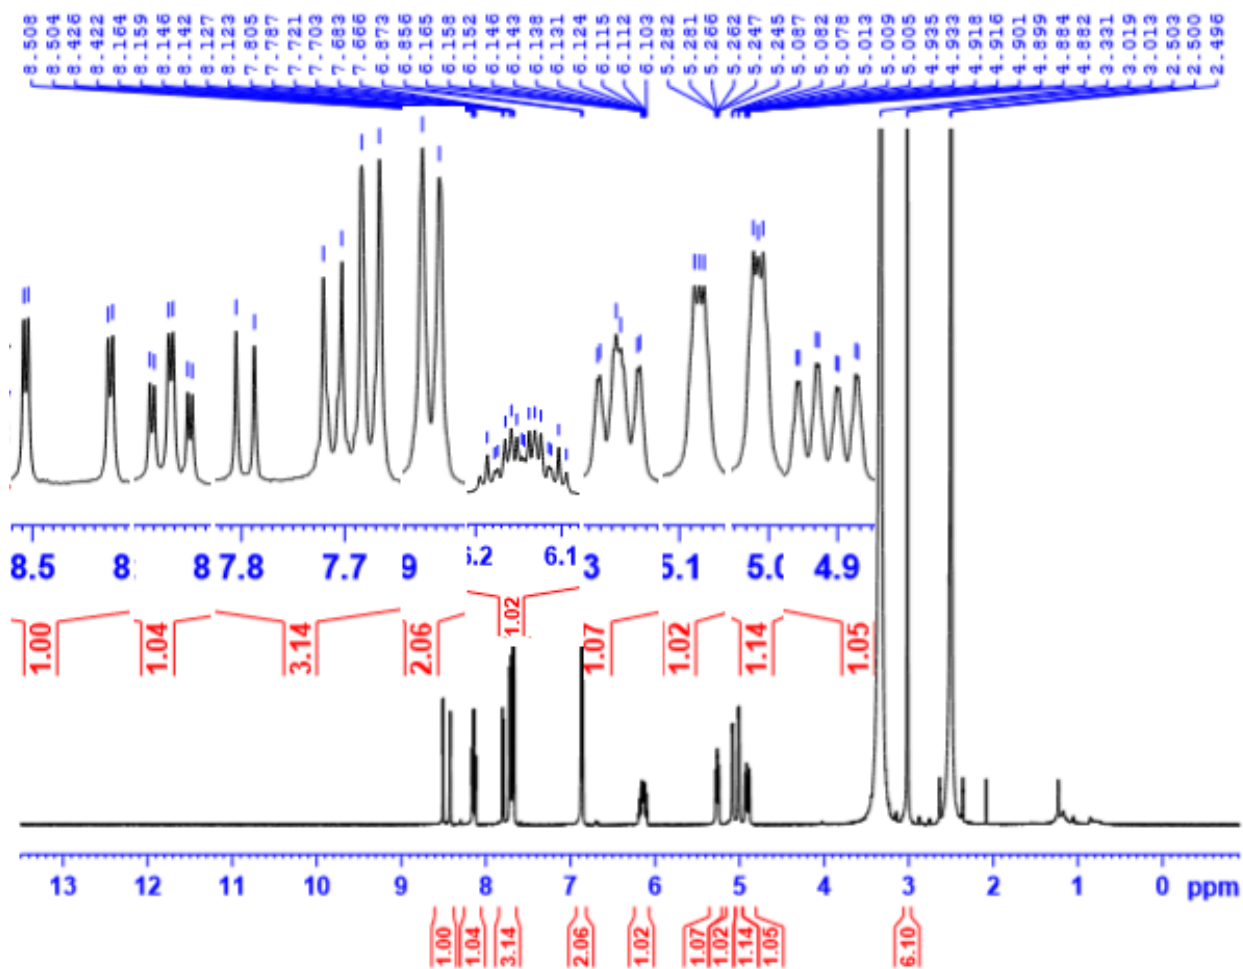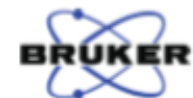

Current Data Parameters  
 NAME 113T\_DNCC  
 EXPNO 1  
 PROCNO 1

F2 - Acquisition Parameters  
 Date\_ 20180711  
 Time 11.48  
 INSTRUM spect  
 PROBHD 5 mm PABBO BB/  
 PULPROG zg30  
 TD 65536  
 SOLVENT DMSO  
 NS 16  
 DS 2  
 SWH 10000.000 Hz  
 FIDRES 0.152588 Hz  
 AQ 3.2767999 sec  
 RG 111.09  
 DW 50.000 usec  
 DE 6.50 usec  
 TE 303.3 K  
 D1 1.00000000 sec  
 TDO 1

----- CHANNEL f1 -----  
 SFO1 500.2030889 MHz  
 NUC1 1H  
 P1 10.00 usec  
 PLW1 22.00000000 W

F2 - Processing parameters  
 SI 65536  
 SF 500.2000054 MHz  
 MDW EM  
 SSB 0  
 LB 0.30 Hz  
 GB 0  
 PC 1.00

# Compound 4g

## ANDCB-DMSO-1H

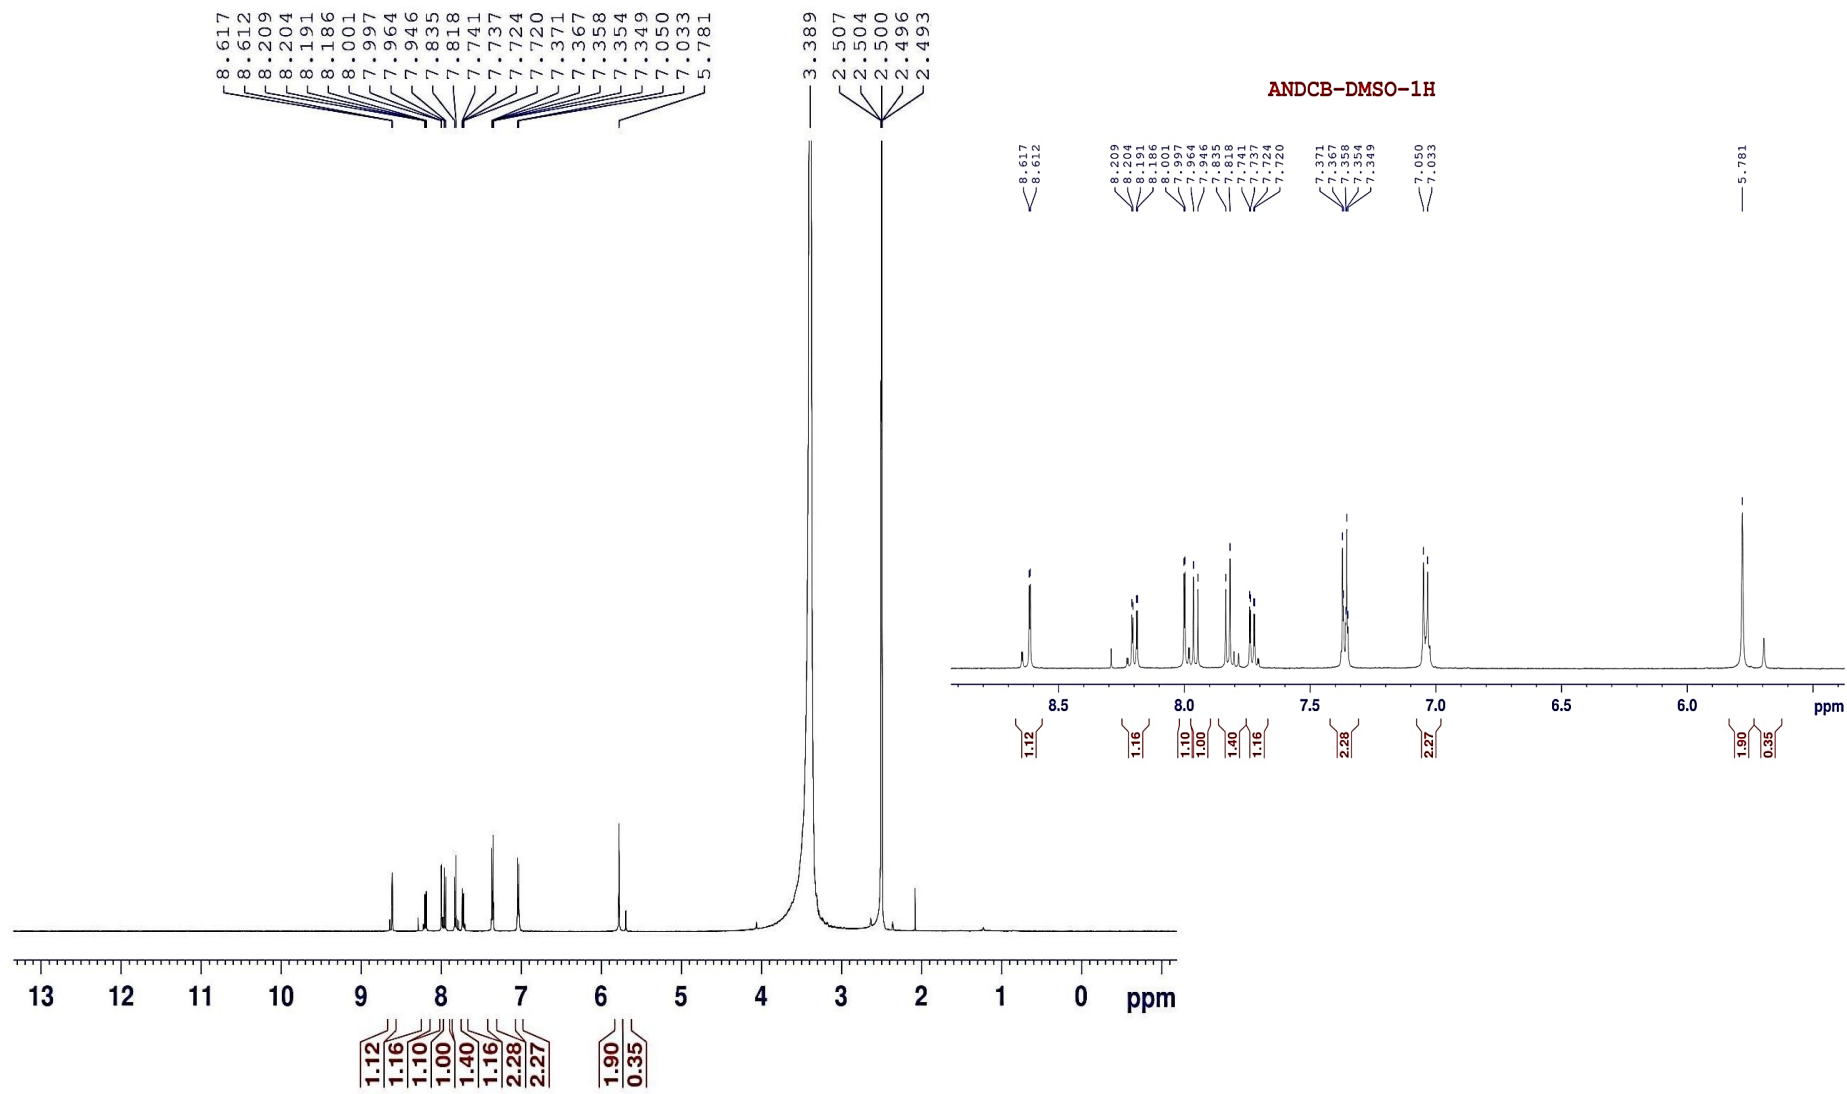

# Compound 4h

## ADME1-DMSO-1H

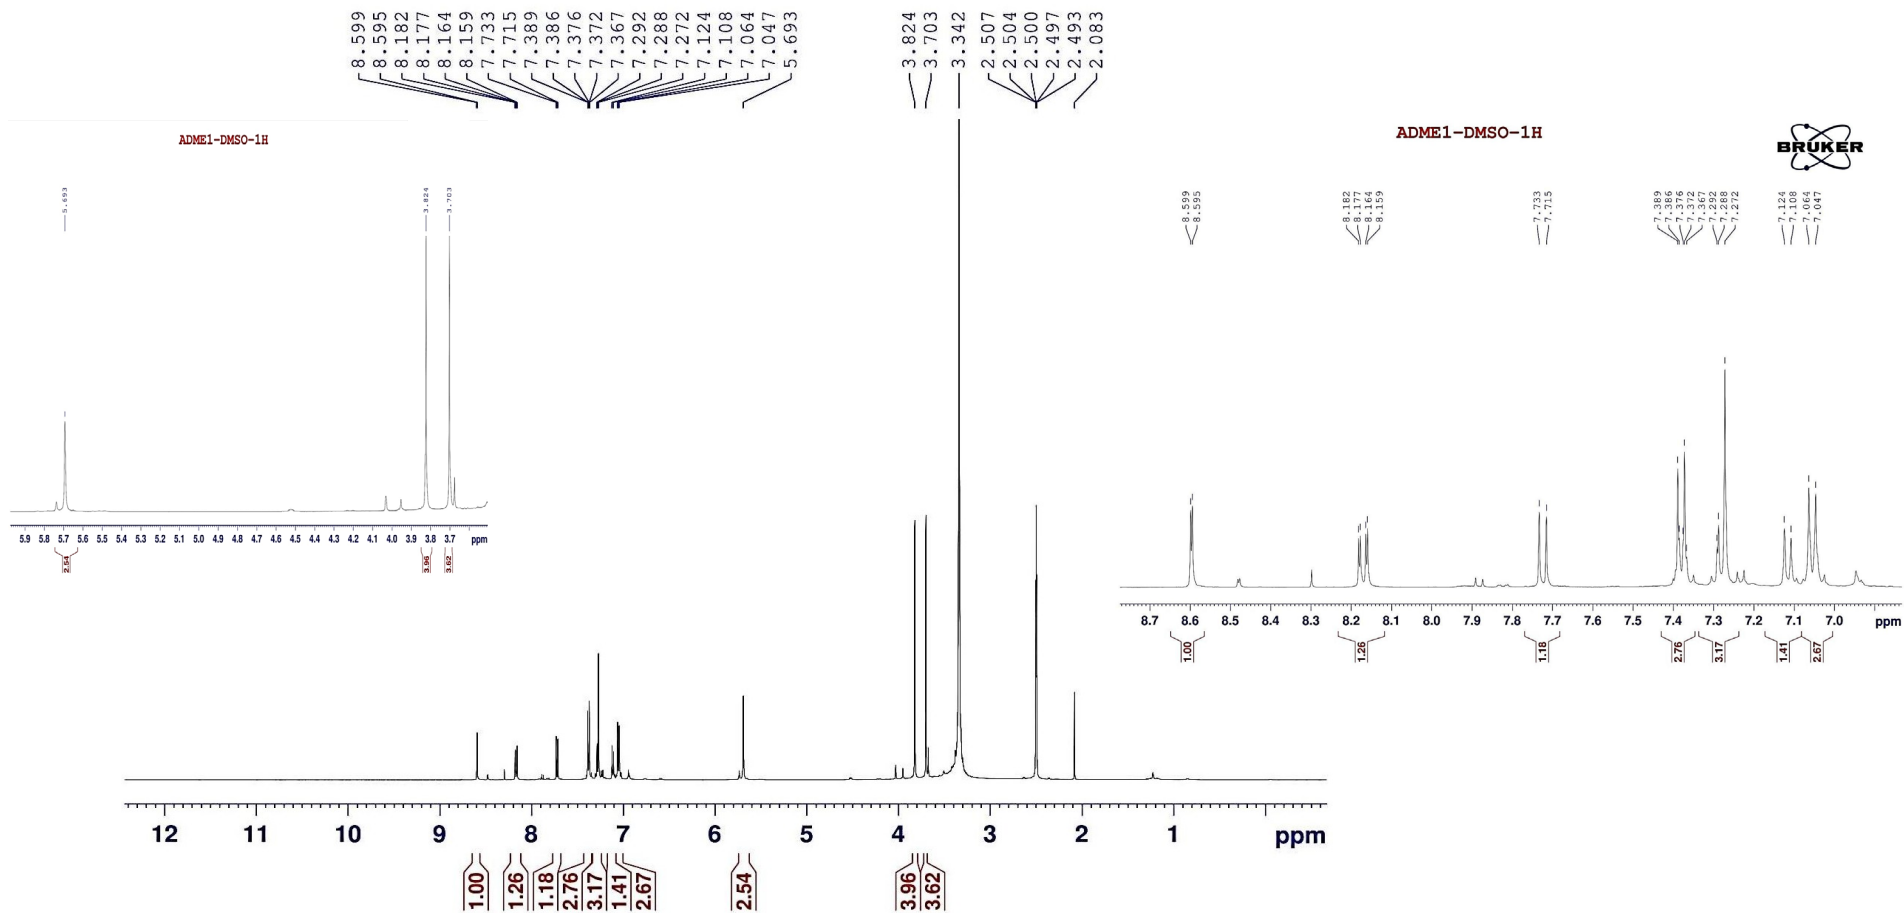

# Compound 4i

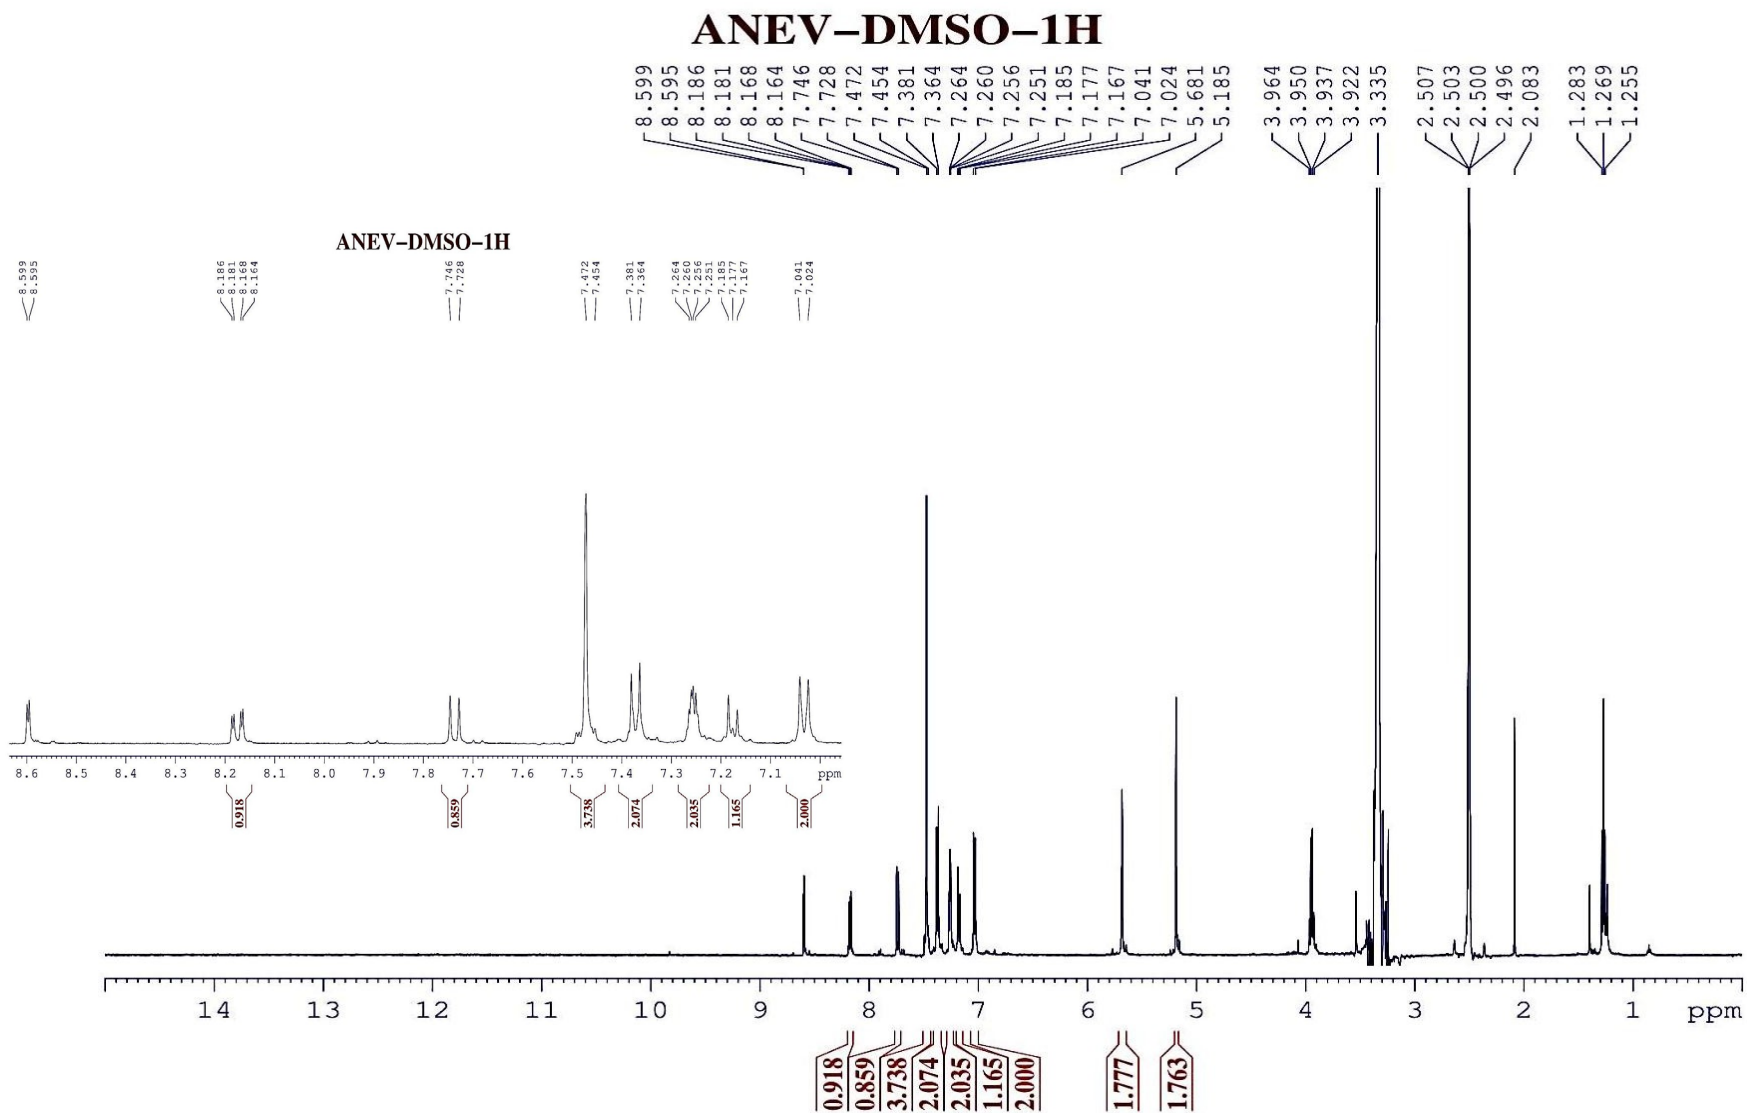

# Compound 4j

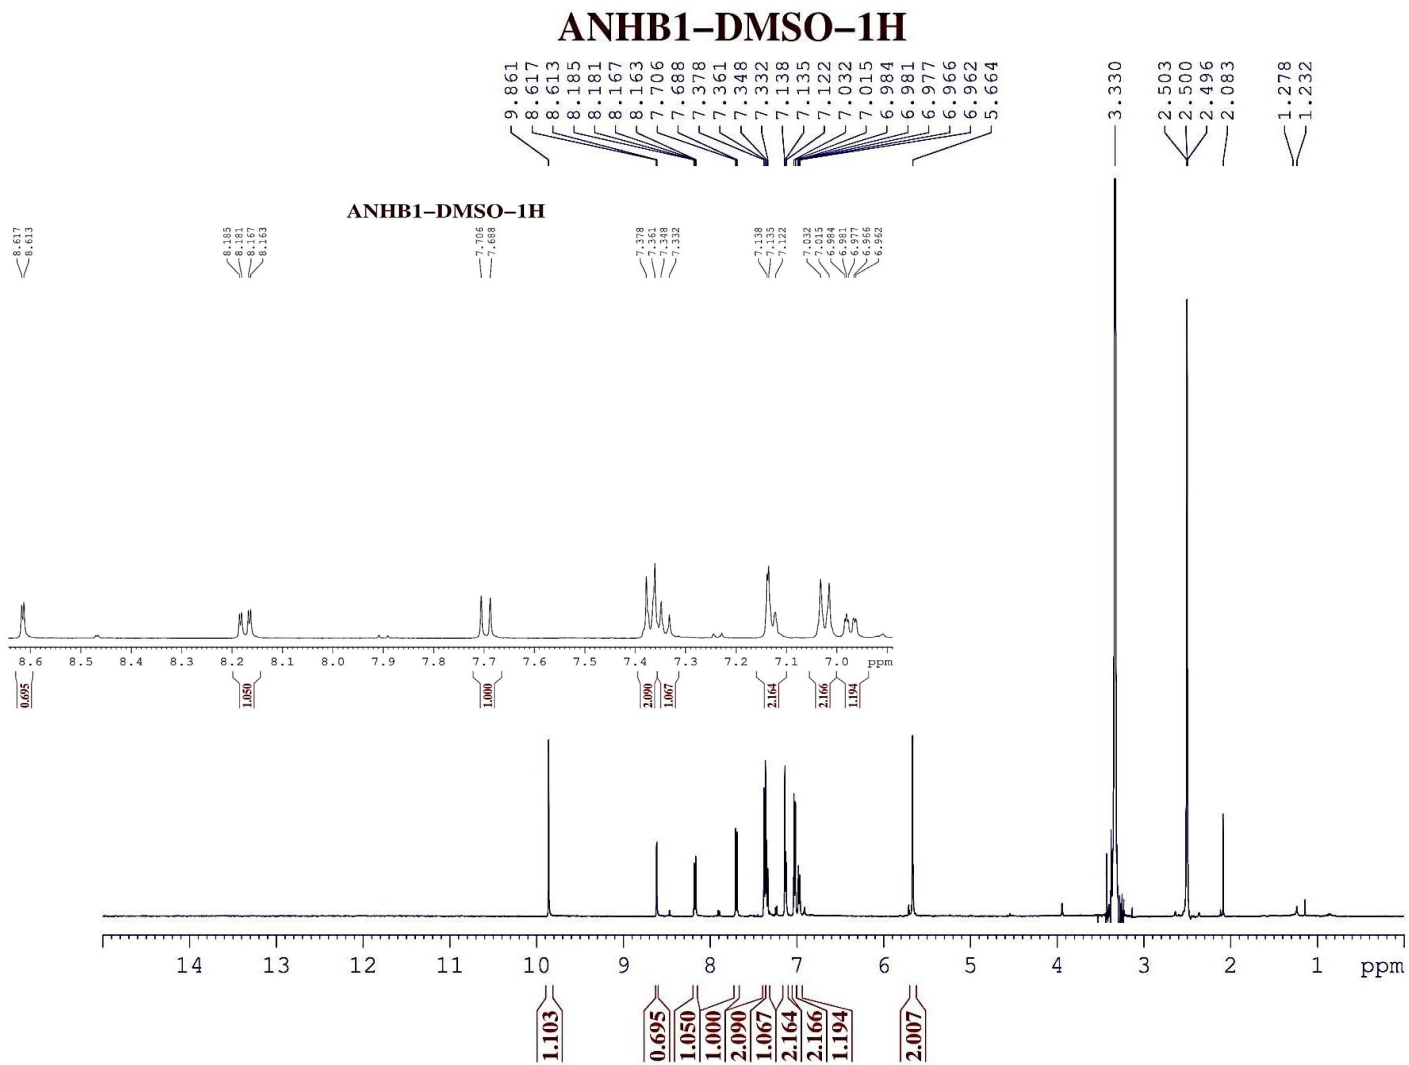

# Compound 4k

## ADMA-DMSO-1H

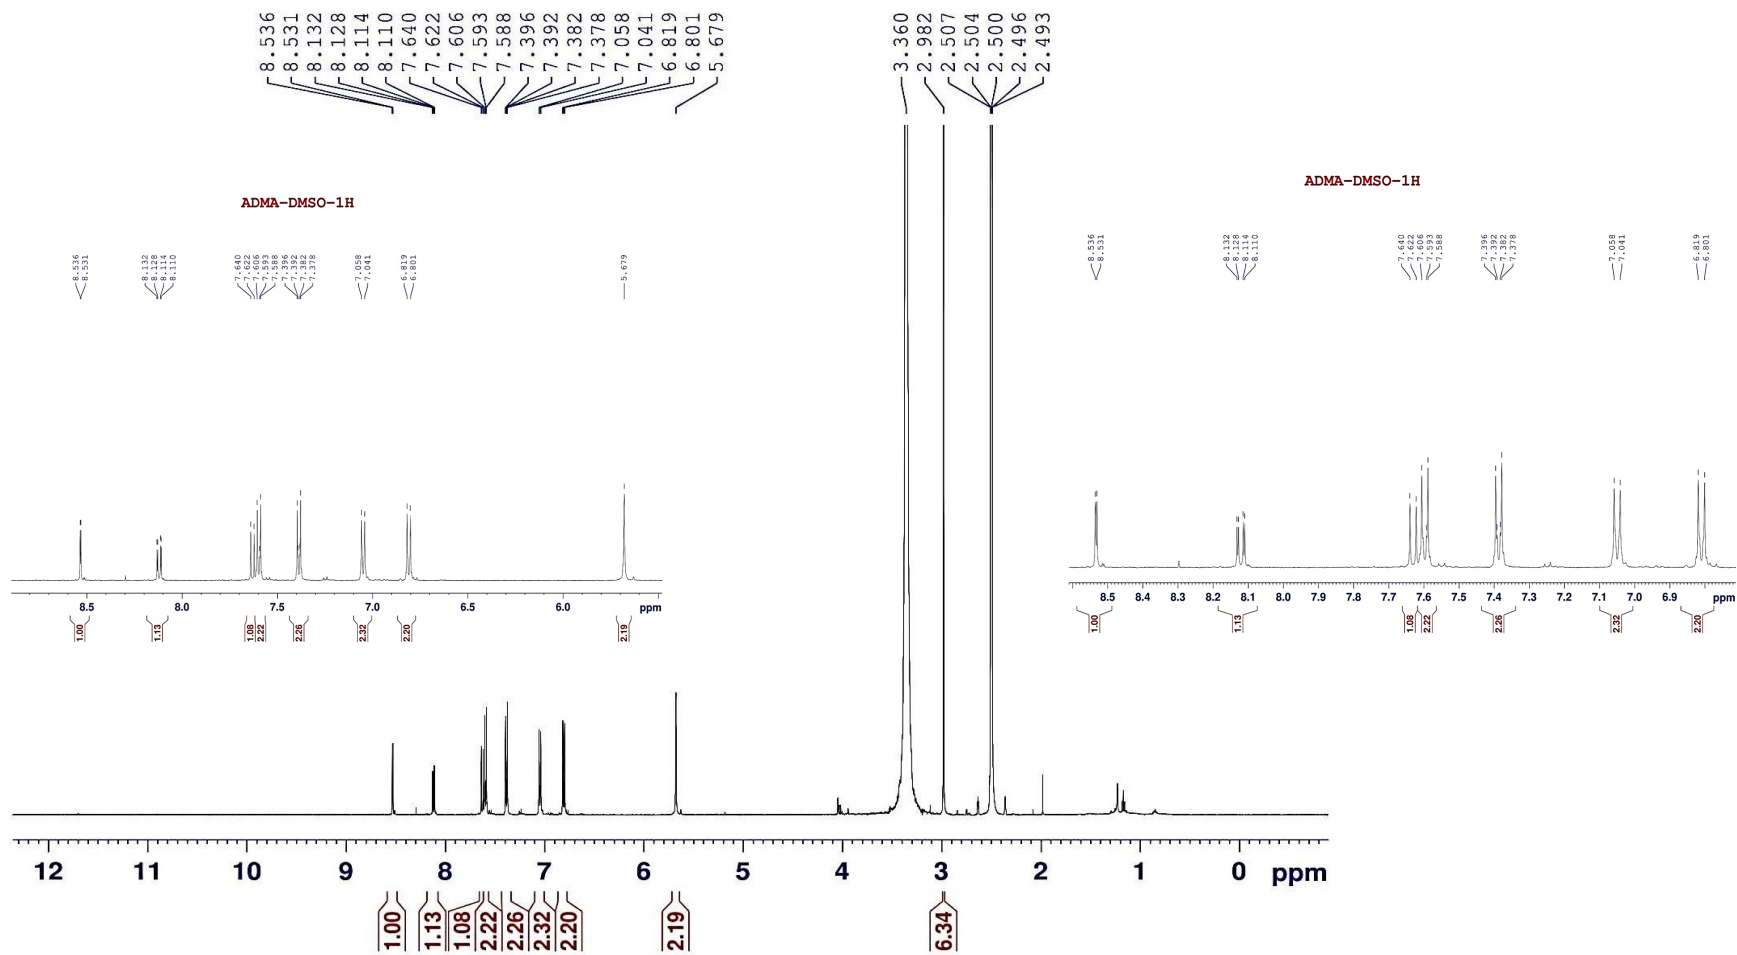

# Compound 4l

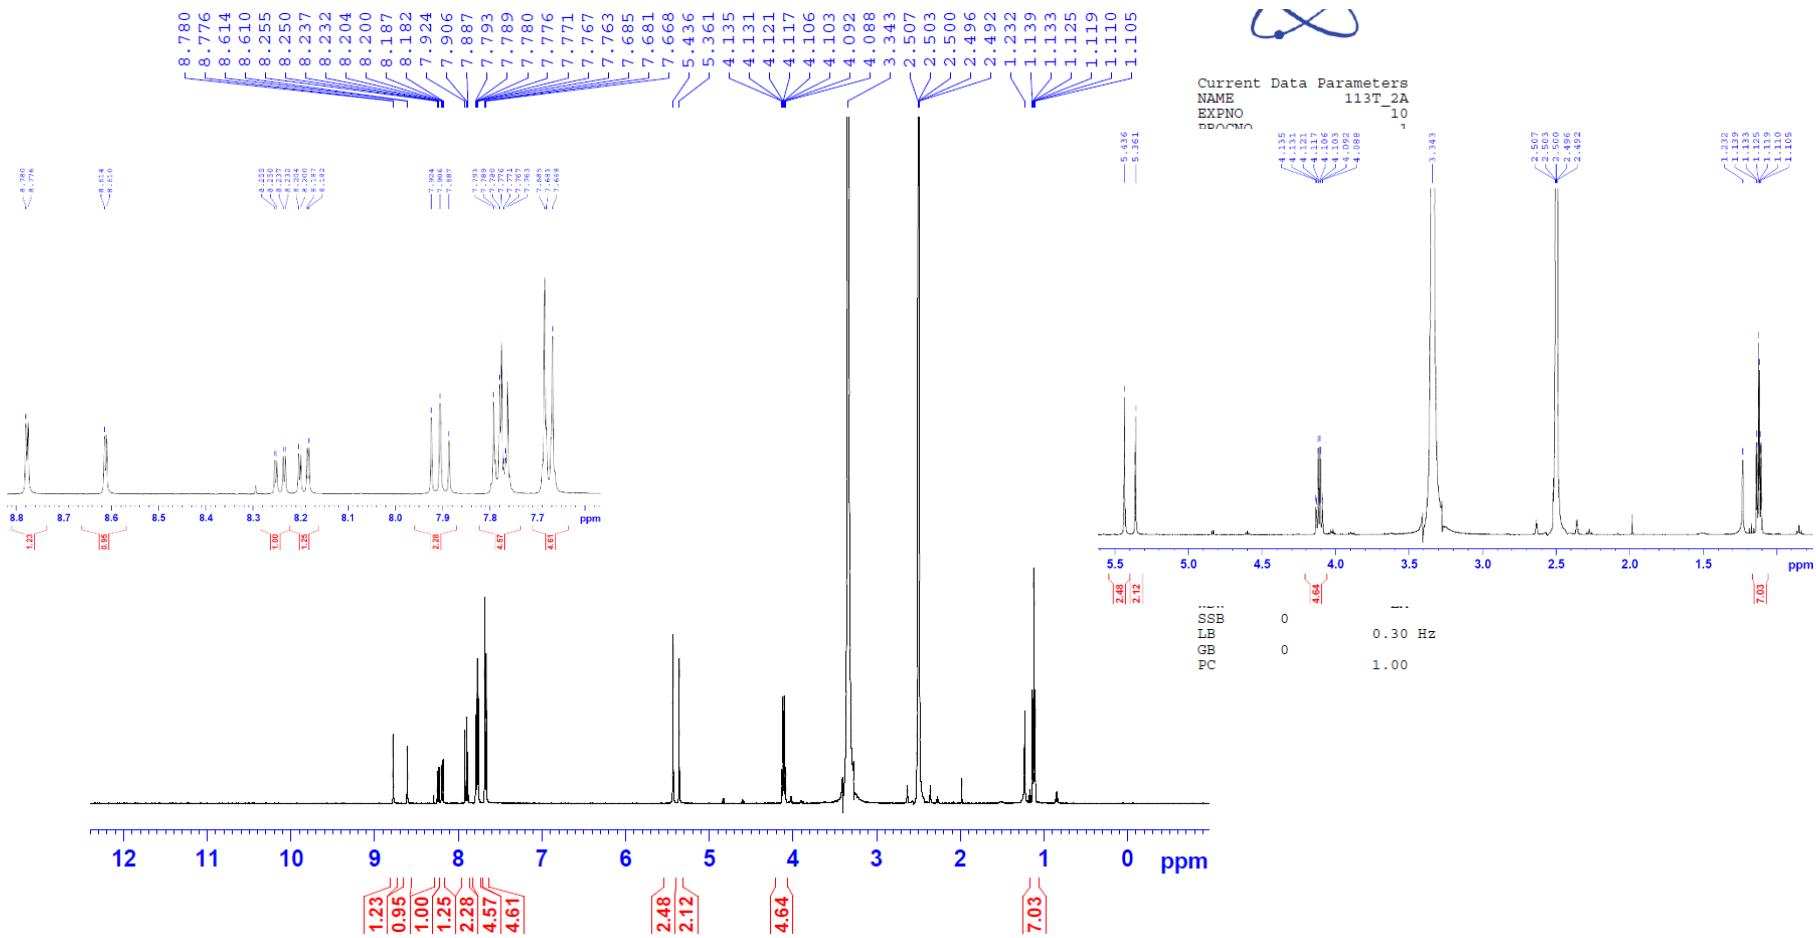



# Compound 4m

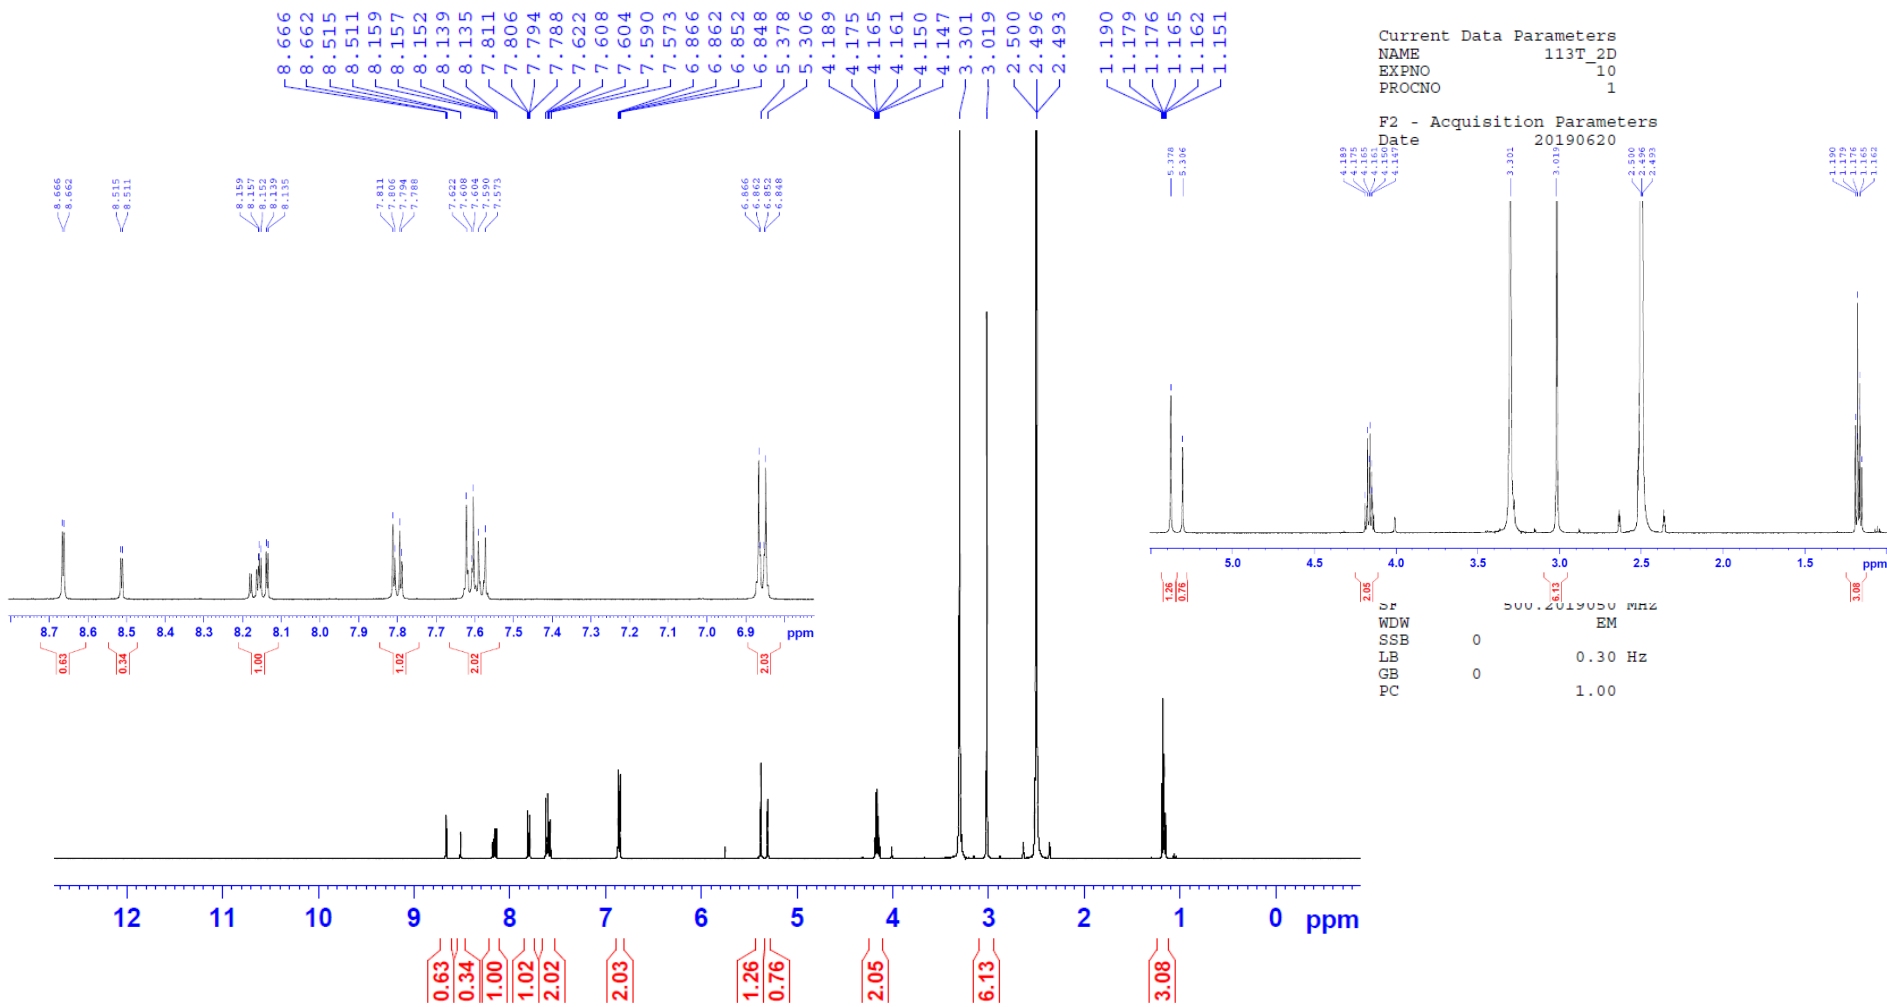

# Compound 4n

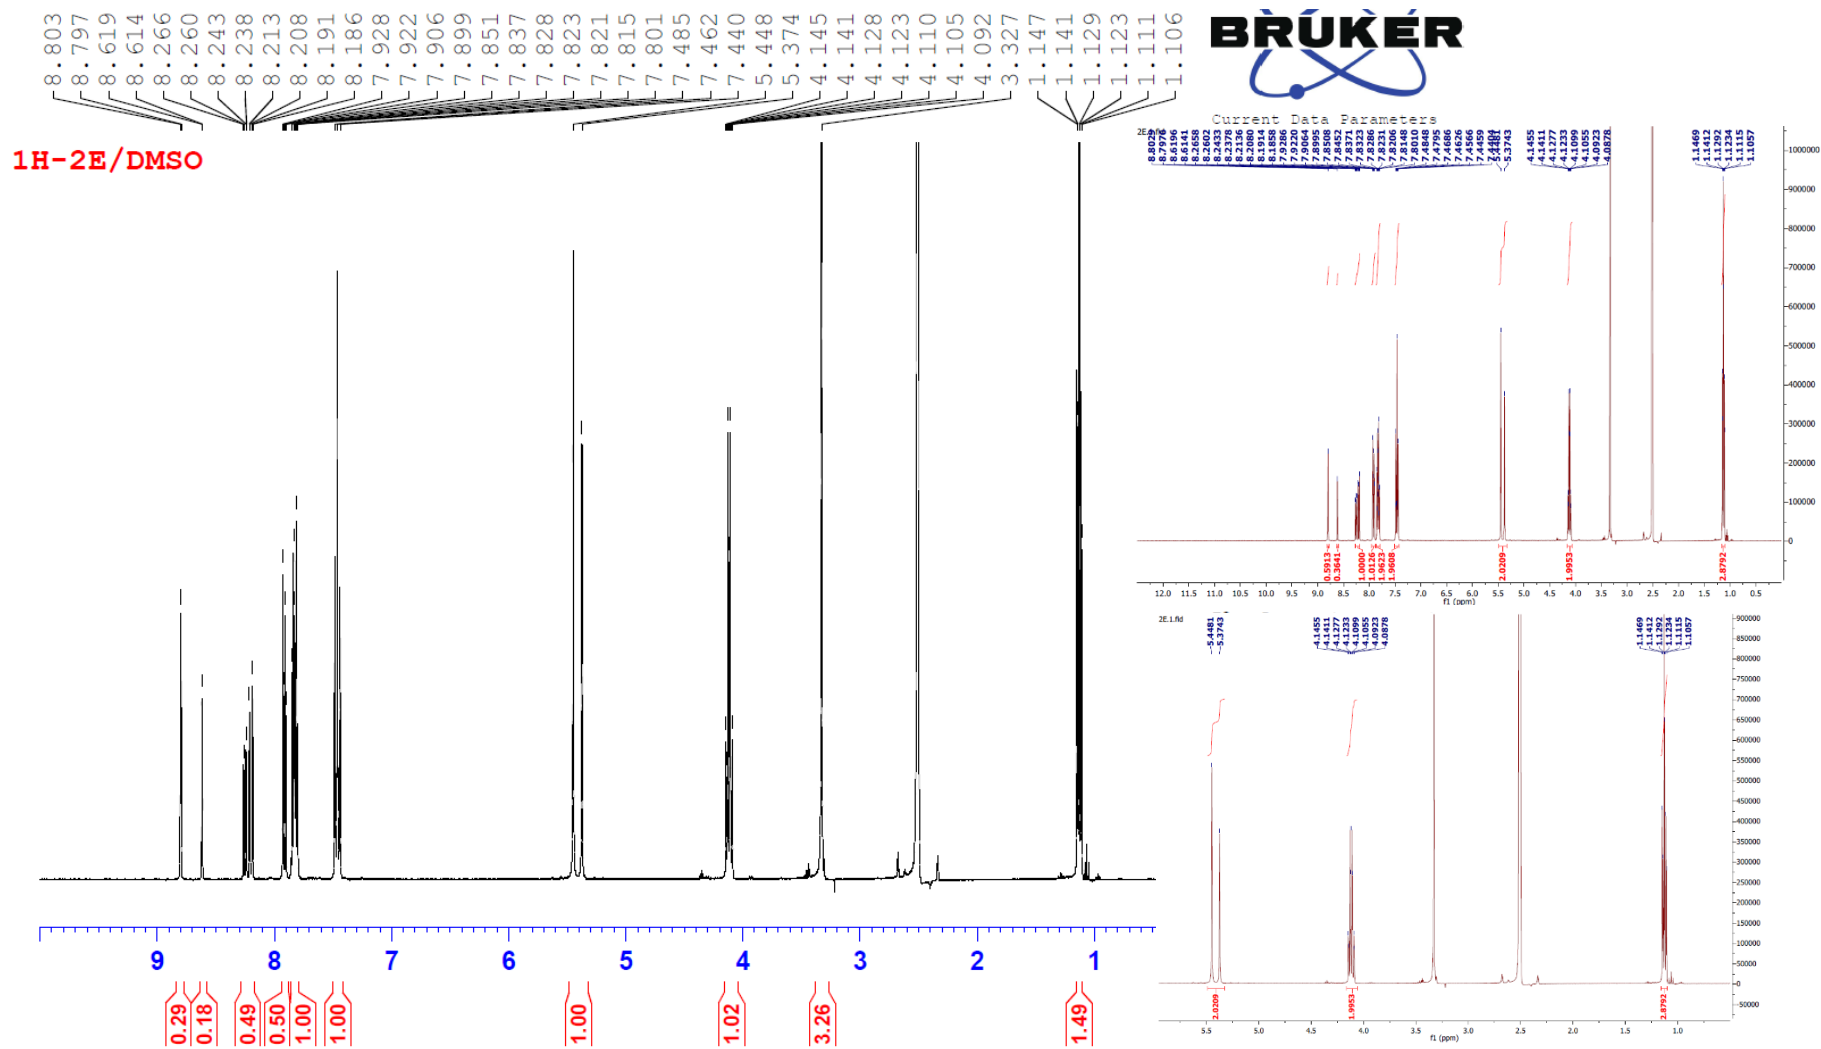

# Compound 4o

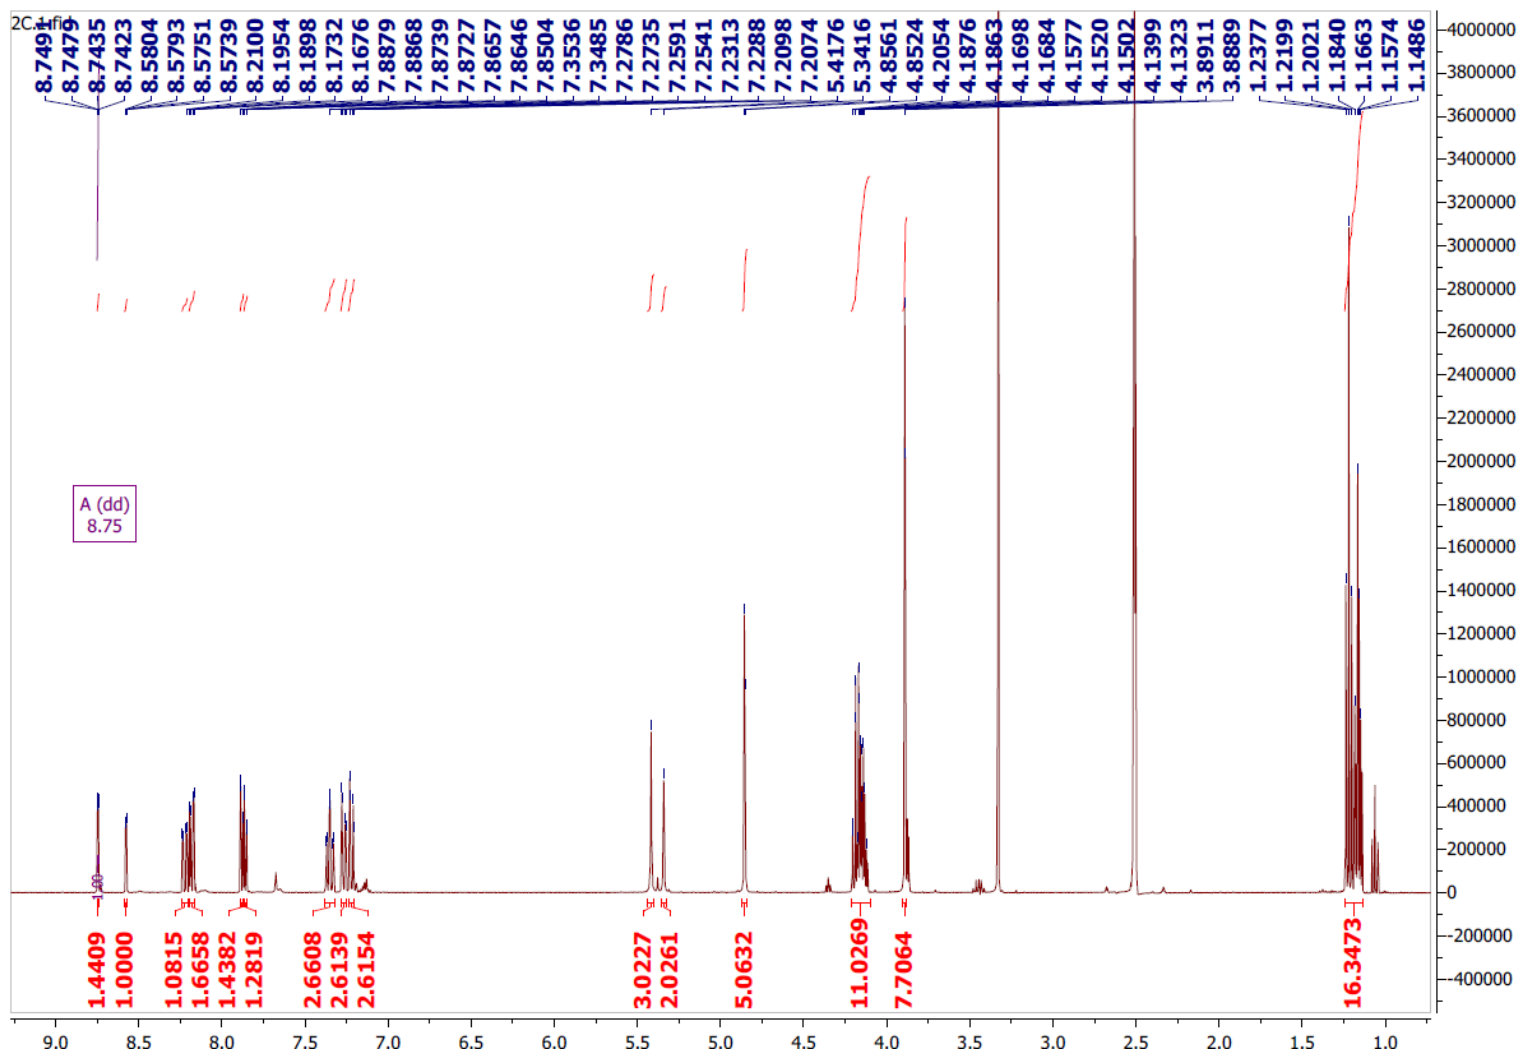

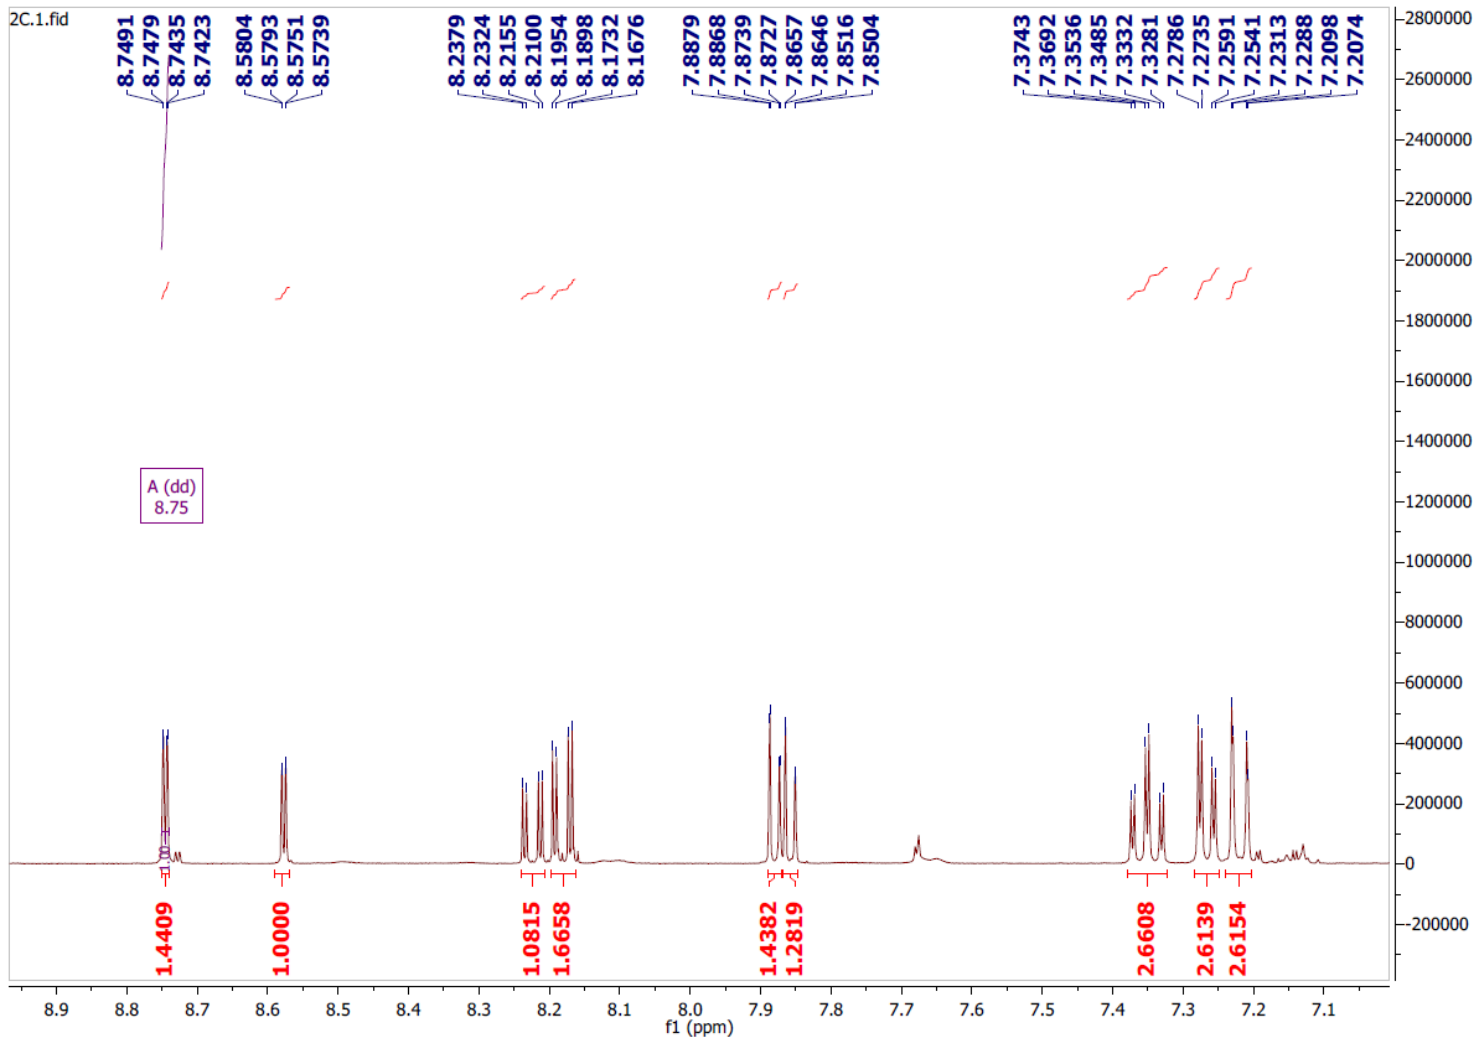

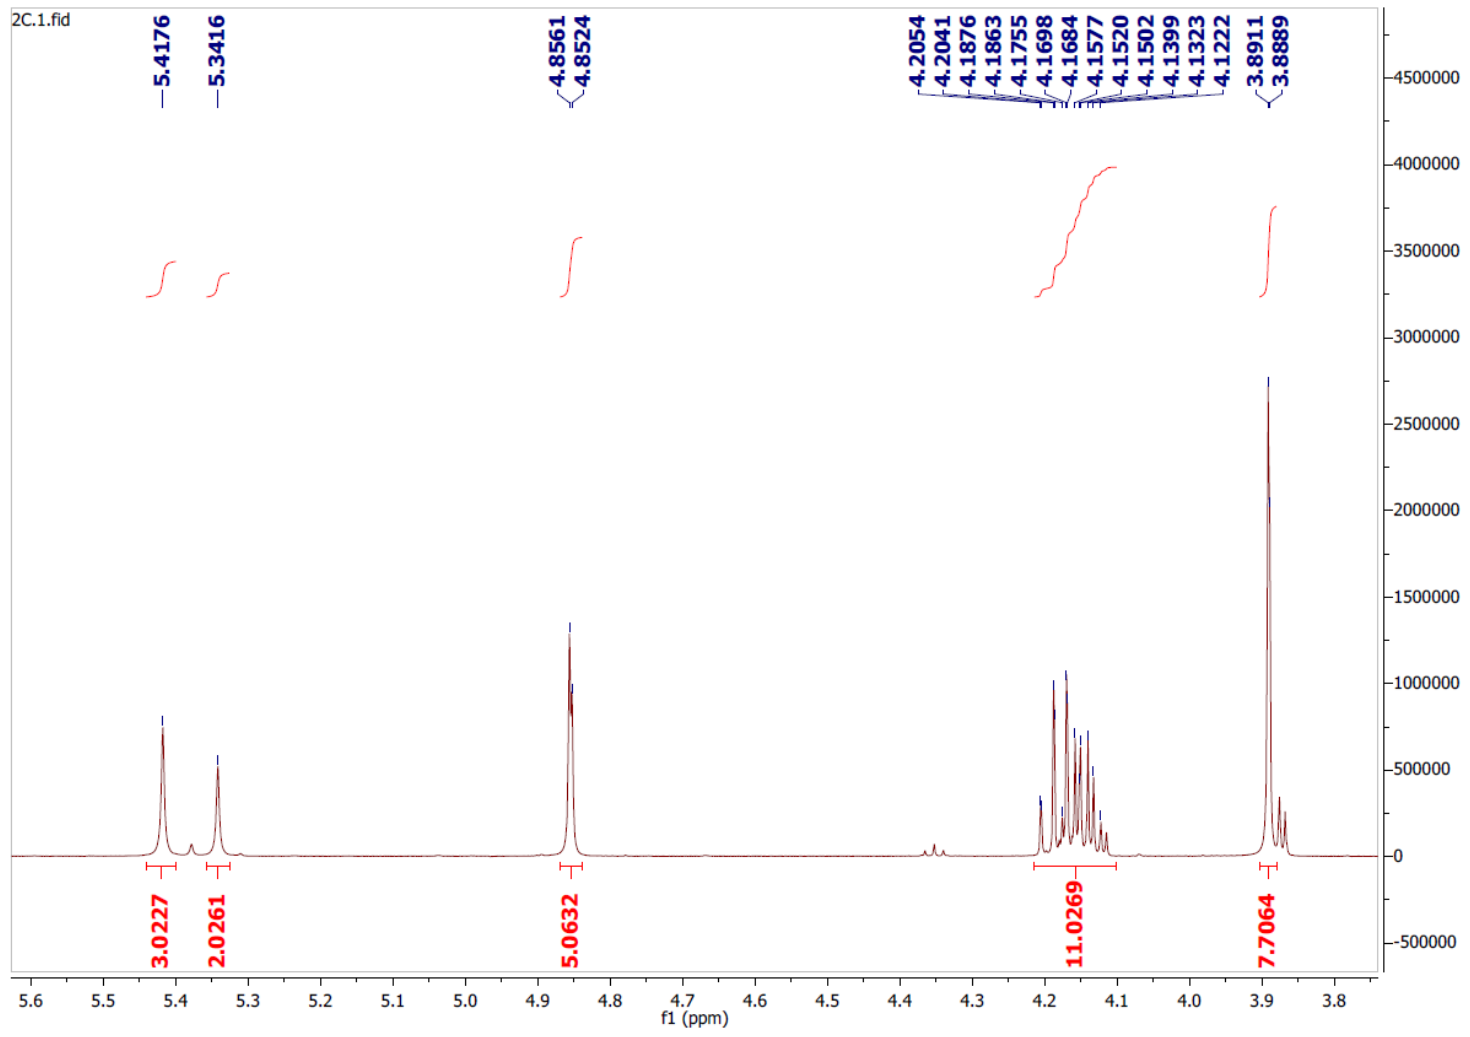

# Compound 4p

FU-DMSO-1H

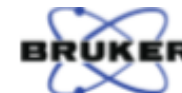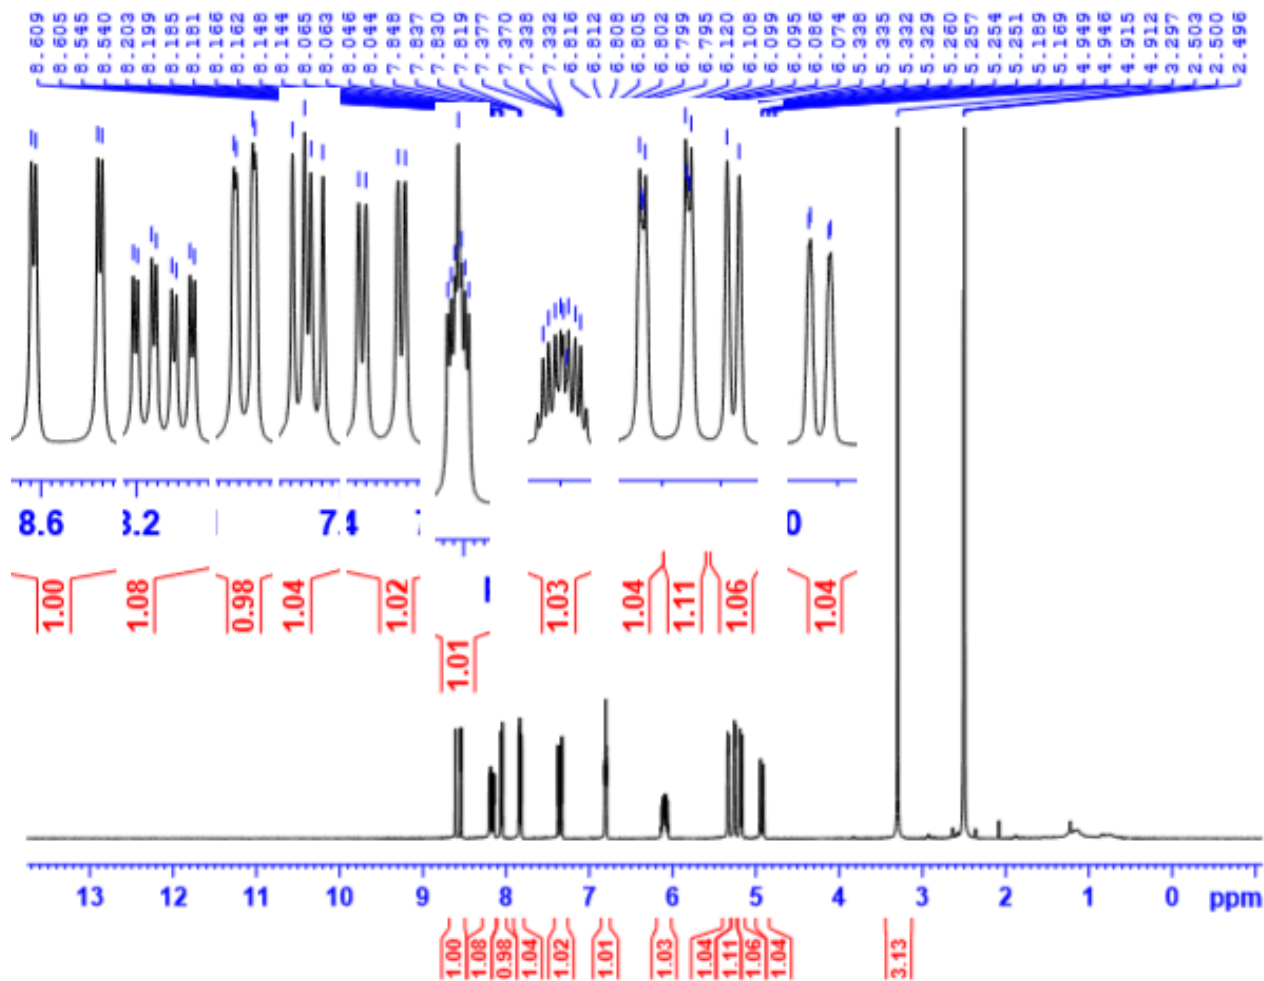

```

Current Data Parameters
NAME      1137_FU
EXPNO    1
PROCNO   1

F2 - Acquisition Parameters
Date_    20180627
Time     11.15
INSTRUM  spect
PROBHD   5 mm PABBO BB/
PULPROG  zg30
TD       65536
SOLVENT  DMSO
NS       16
DS       2
SWH      10000.000 Hz
FIDRES   0.152588 Hz
AQ       3.2767999 sec
RG       142.98
DW       50.000 usec
DE       6.50 usec
TE       304.2 K
D1       1.00000000 sec
TD0      1

----- CHANNEL f1 -----
SFO1    500.2030889 MHz
NUC1    1H
P1      10.00 usec
PLW1    22.00000000 W

F2 - Processing parameters
SI      65536
SF      500.2000053 MHz
WDW     EM
SSB     0
LB      0.30 Hz
GB      0
PC      1.00
    
```

# Compound 4q

## ANFU1-DMSO-1H

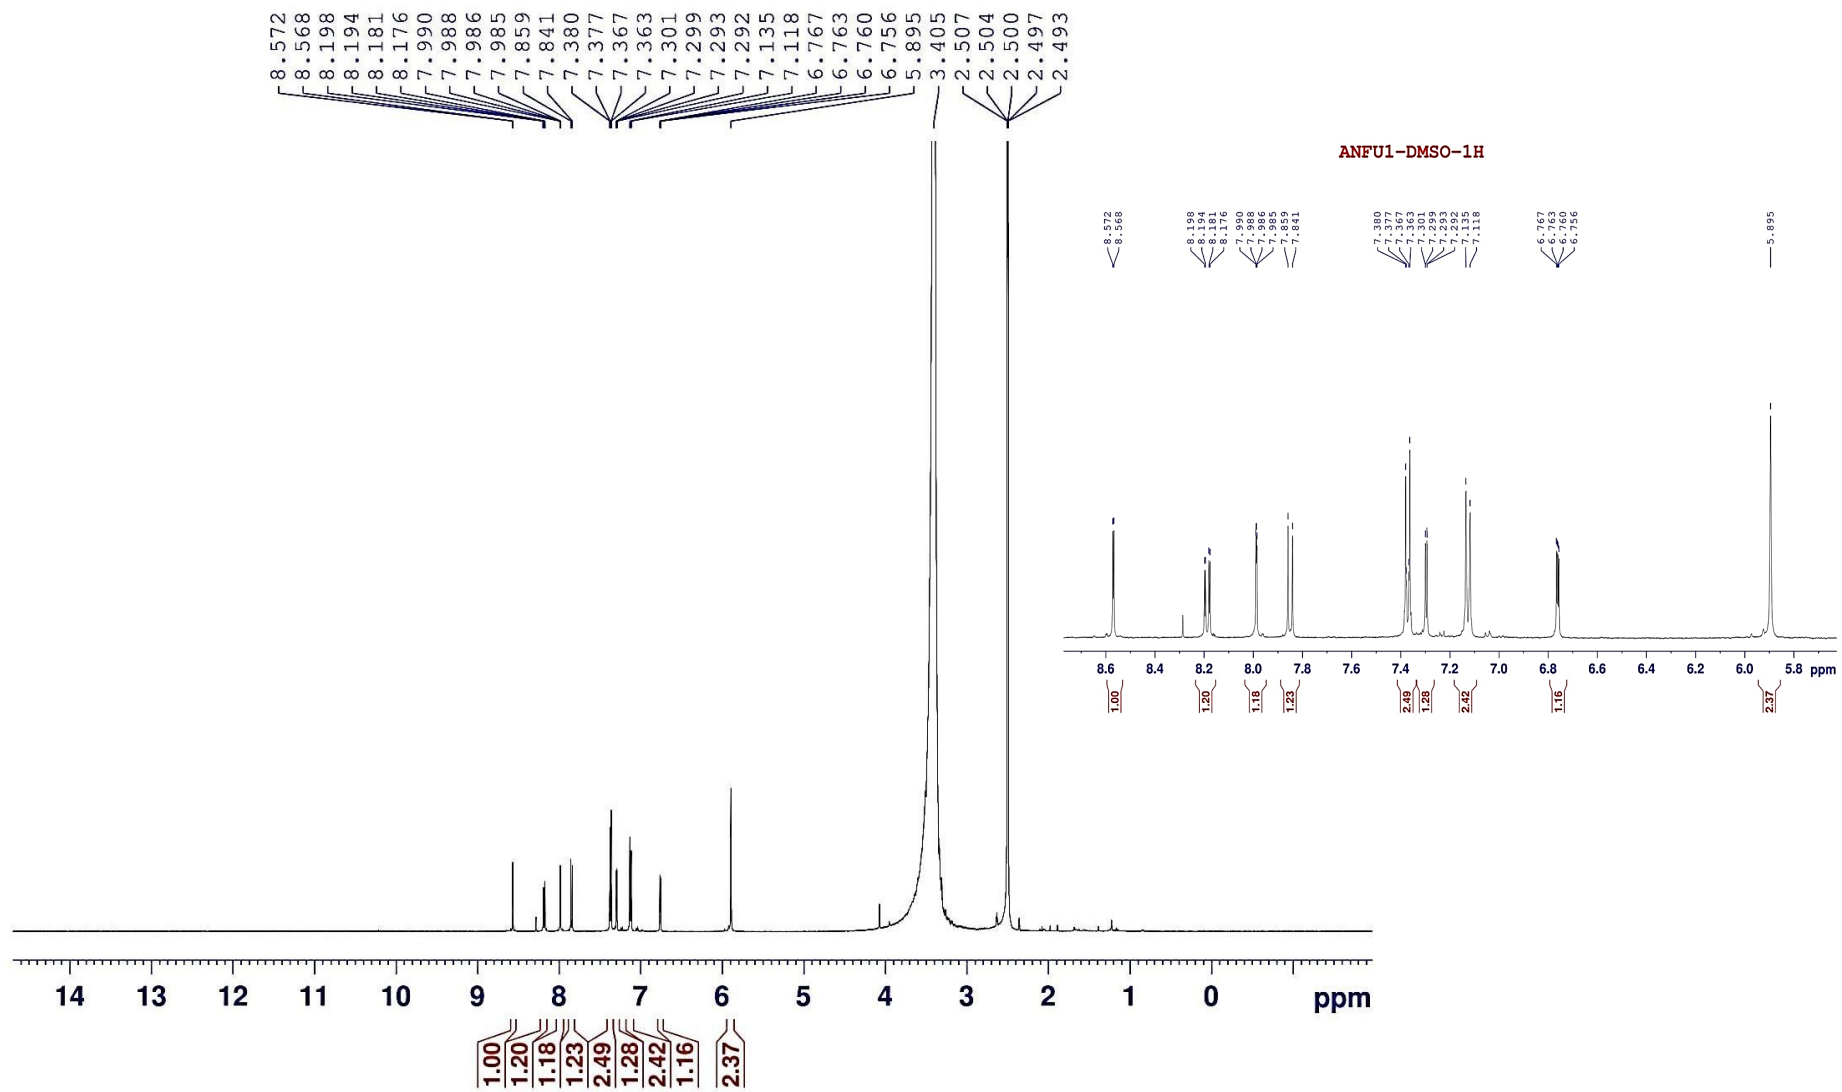

# Compound 4r

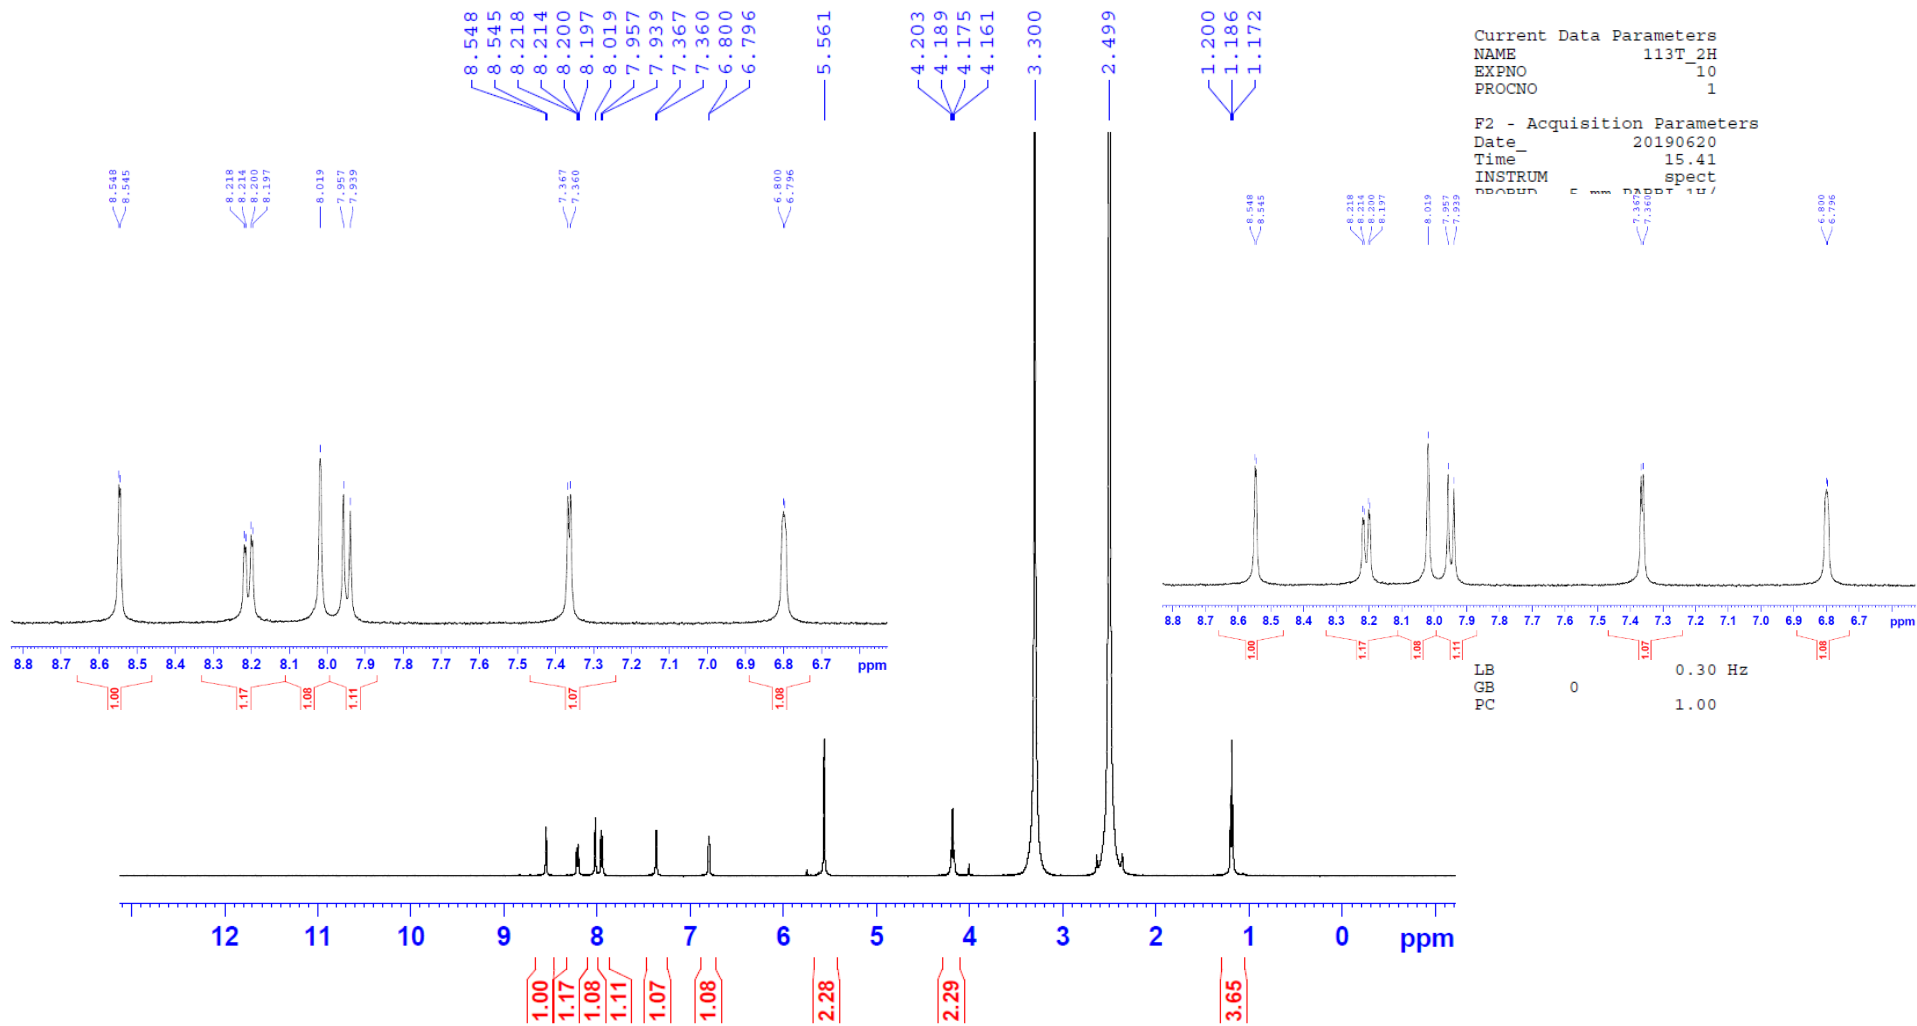



# 13C NMR SPECTRA

Compound 3a

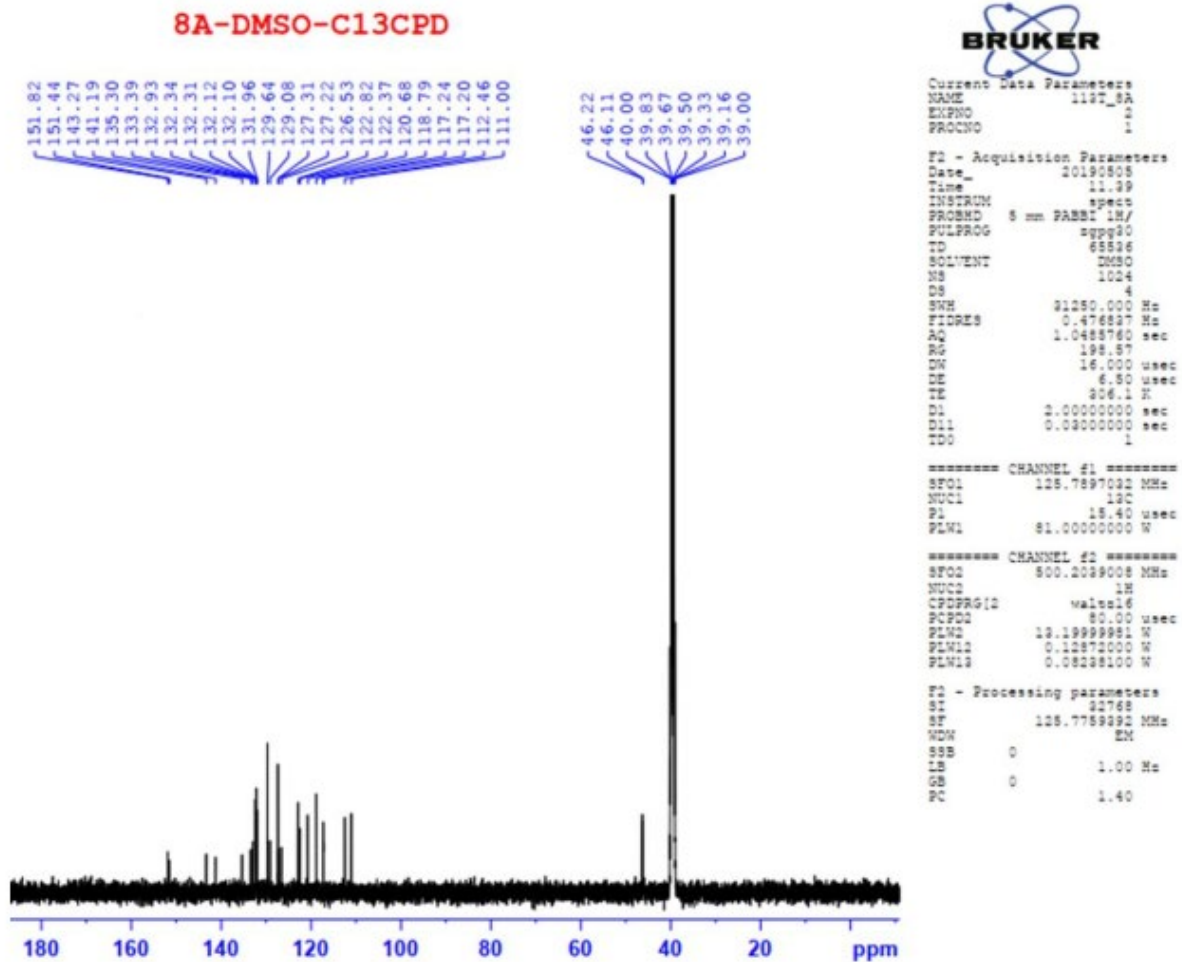

# Compound 3b

## 3A-DMSO-C13CPD

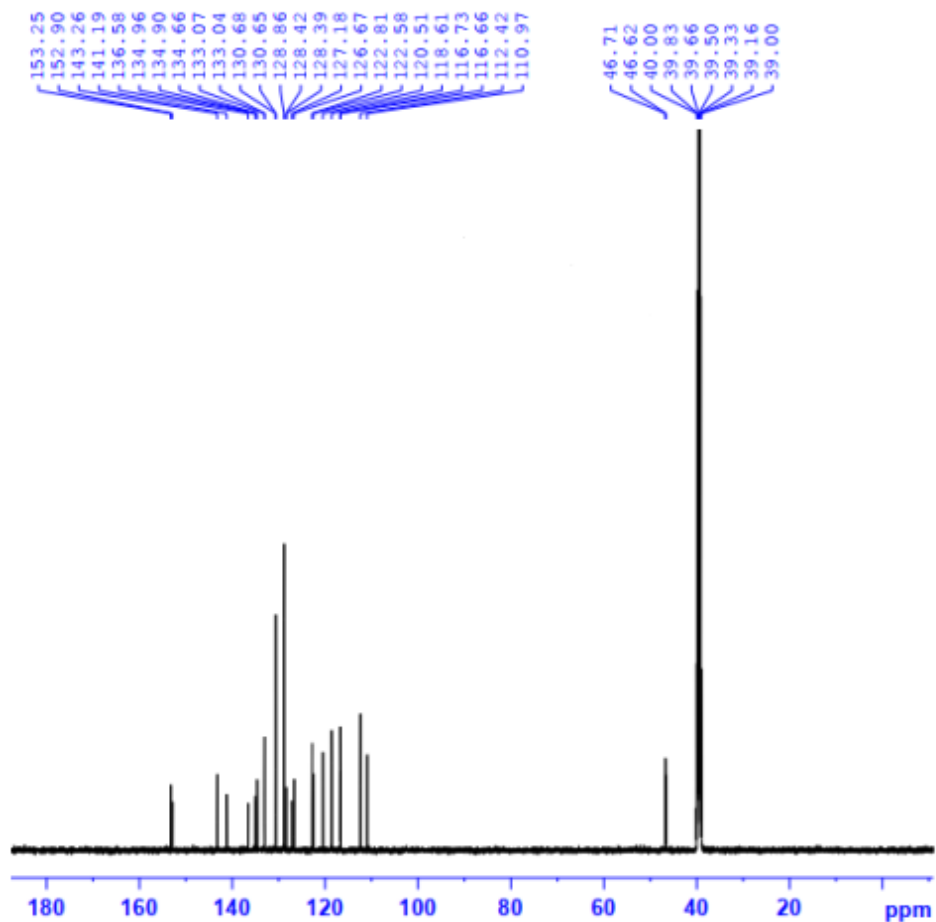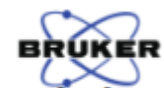

Current Data Parameters  
NAME 1107\_3A  
EXPNO 2  
PROCNO 1

F2 - Acquisition Parameters  
Date\_ 20190307  
Time\_ 17.19  
INSTRUM spect  
PROBHD 5 mm JABBO BB/  
PULPROG zgpg30  
TD 65536  
SOLVENT DMSO  
NS 512  
DS 4  
SWH 31280.000 Hz  
FIDRES 0.476897 Hz  
AQ 1.0488760 sec  
RG 198.87  
DM 16.000 usec  
DE 6.50 usec  
TE 303.1 K  
D1 2.00000000 sec  
D11 0.03000000 sec  
TDO 1

\*\*\*\*\* CHANNEL f1 \*\*\*\*\*  
SFO1 125.7692353 MHz  
NUC1 13C  
P1 10.00 usec  
PLW1 88.00000000 W

\*\*\*\*\* CHANNEL f2 \*\*\*\*\*  
SFO2 500.2020008 MHz  
NUC2 1H  
CPDPRG2 waltz16  
PCPD2 80.00 usec  
PLW2 22.00000000 W  
PLW12 0.34875000 W  
PLW13 0.22000000 W

F2 - Processing parameters  
SI 32768  
SF 125.7783900 MHz  
WDW EM  
SSB 0  
LB 1.00 Hz  
GB 0  
PC 1.40

# Compound 3c

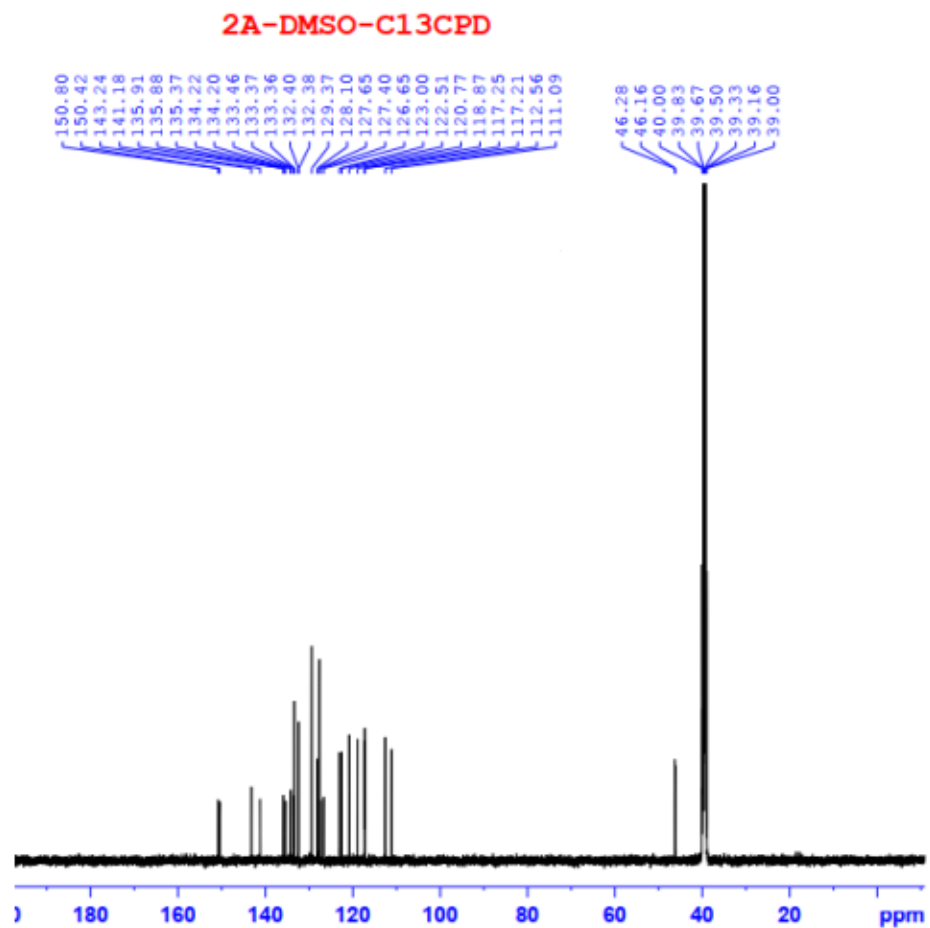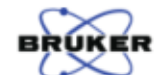

```

Current Data Parameters
NAME      1107_2A
EXPNO    2
PROCNO   1

F2 - Acquisition Parameters
Date_    20190307
Time     16.33
INSTRUM  spect
PROBHD   5 mm PABBO BB/
PULPROG  zgpg30
TD       65536
SOLVENT  DMSO
NS       1024
DS       4
SNH      31250.000 Hz
FIDRES   0.476837 Hz
AQ       1.0488760 sec
RG       198.57
DN       16.000 usec
DE       6.50 usec
TE       303.2 K
DL       2.00000000 sec
D11      0.02000000 sec
TD0      1

***** CHANNEL f1 *****
SF01     125.7692051 MHz
NUC1     13C
P1       10.00 usec
PLW1     88.00000000 W

***** CHANNEL f2 *****
SF02     500.2020008 MHz
NUC2     1H
CPDPRG12 waltz16
PCPD2    80.00 usec
PLW2     22.00000000 W
PLW12    0.34378000 W
PLW13    0.22000000 W

F2 - Processing parameters
SI       32768
SF       125.7754892 MHz
WDW      EM
SSB      0
LB       1.00 Hz
GB       0
PC       1.40
    
```

# Compound 3d

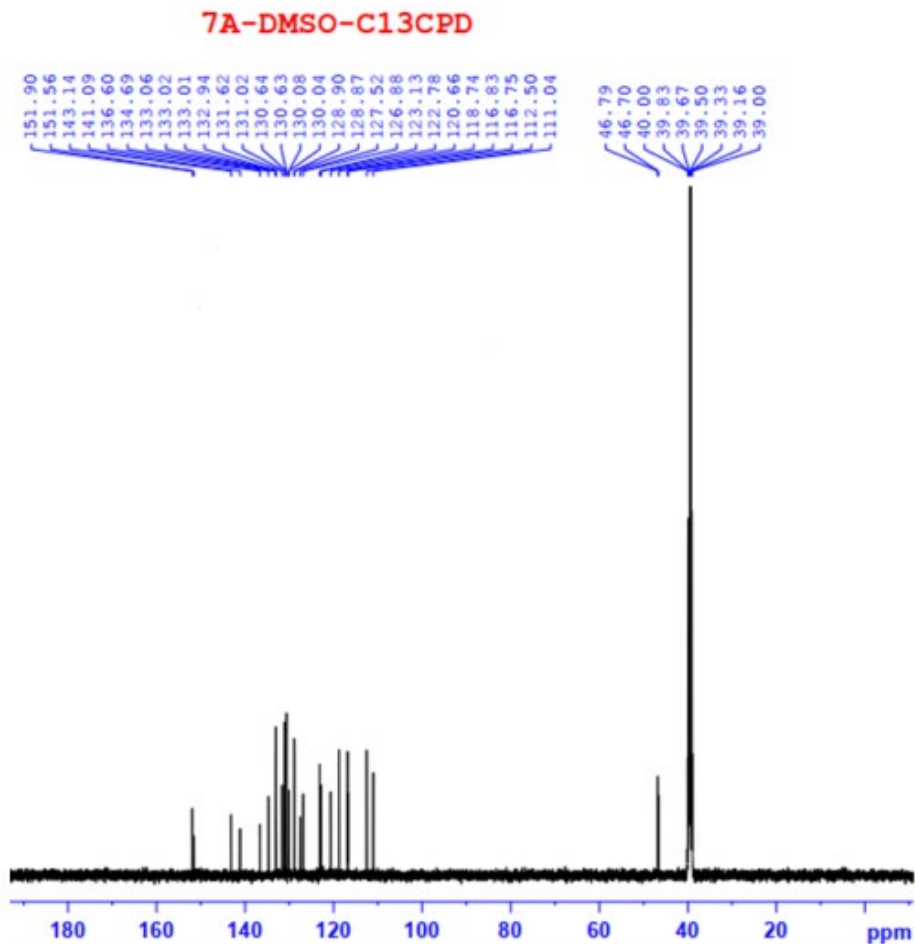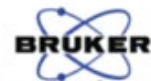

```

Current Data Parameters
NAME          1137_7A
EXPNO        1
PROCNO       1

F2 - Acquisition Parameters
Date_        20190428
Time         18.34
INSTRUM      spect
PROBHD       5 mm PABBI 1H/
PULPROG      zgpg30
TD           65536
SOLVENT      DMSO
NS           256
DS           4
SFO1         125.760000 MHz
FIDRES       0.476837 Hz
AQ           1.0485760 sec
RG           198.57
DK           16.000 usec
DE           6.50 usec
TE           304.9 K
D1           2.00000000 sec
d11          0.03000000 sec
TDO          1

===== CHANNEL f1 =====
SFO1         125.7697032 MHz
NUC1         13C
P1           15.40 usec
PLW1         81.00000000 W

===== CHANNEL f2 =====
SFO2         500.13629008 MHz
NUC2         1H
CPDPRG2      waltz16
PCPD2        80.00 usec
PLW2         13.19999981 W
PLW12        0.12872000 W
PLW13        0.082288100 W

F2 - Processing parameters
SI           32768
SF           125.7759229 MHz
WDW          EM
SSB          0
LB           1.00 Hz
GB           0
PC           1.40
    
```

# Compound 3e

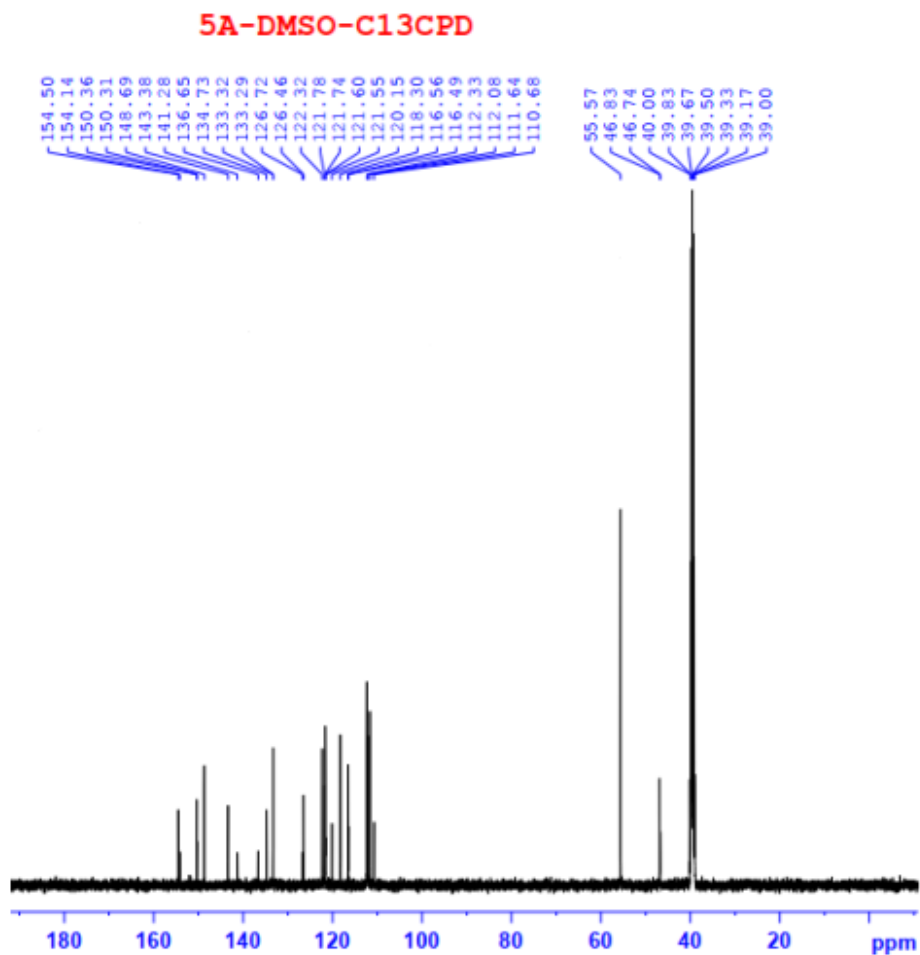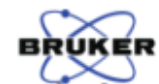

```
Current Data Parameters
NAME      1197_5A
EXPNO    2
PROCNO   1

F2 - Acquisition Parameters
Date_    20190426
Time     11.59
INSTRUM  spect
PROBHD   5 mm PABBI 1H/
PULPROG  zgpg30
TD       65536
SOLVENT  DMSO
NS       256
DS       4
SWH      31250.000 Hz
FIDRES   0.478837 Hz
AQ       1.0488760 sec
RG       129.57
DM       16.000 usec
DE       6.50 usec
TE       304.6 K
D1       2.0000000 sec
D11      0.0300000 sec
TDO      1

===== CHANNEL f1 =====
SFO1     125.7697032 MHz
NUC1     13C
P1       18.40 usec
PLW1     81.00000000 W

===== CHANNEL f2 =====
SFO2     500.2029008 MHz
NUC2     1H
CPDPRG2  waltz16
PCPD2    80.00 usec
PLW2     13.19999981 W
PLW12    0.12872000 W
PLW13    0.08228100 W

F2 - Processing parameters
SI       32768
SF       125.7759323 MHz
WDW      EM
SSB      0
LB       1.00 Hz
GB       0
PC       1.40
```

# Compound 3f

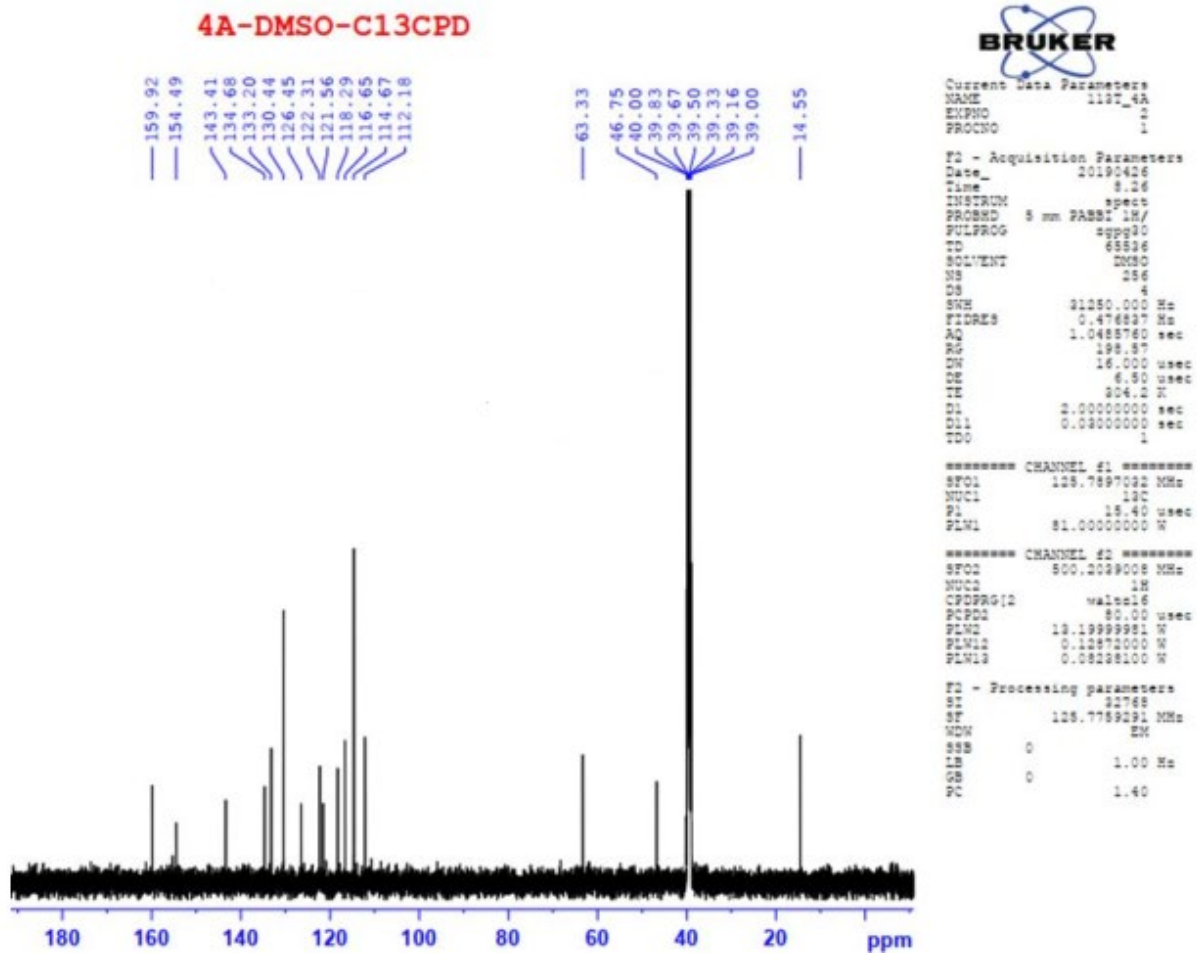

# Compound 3g

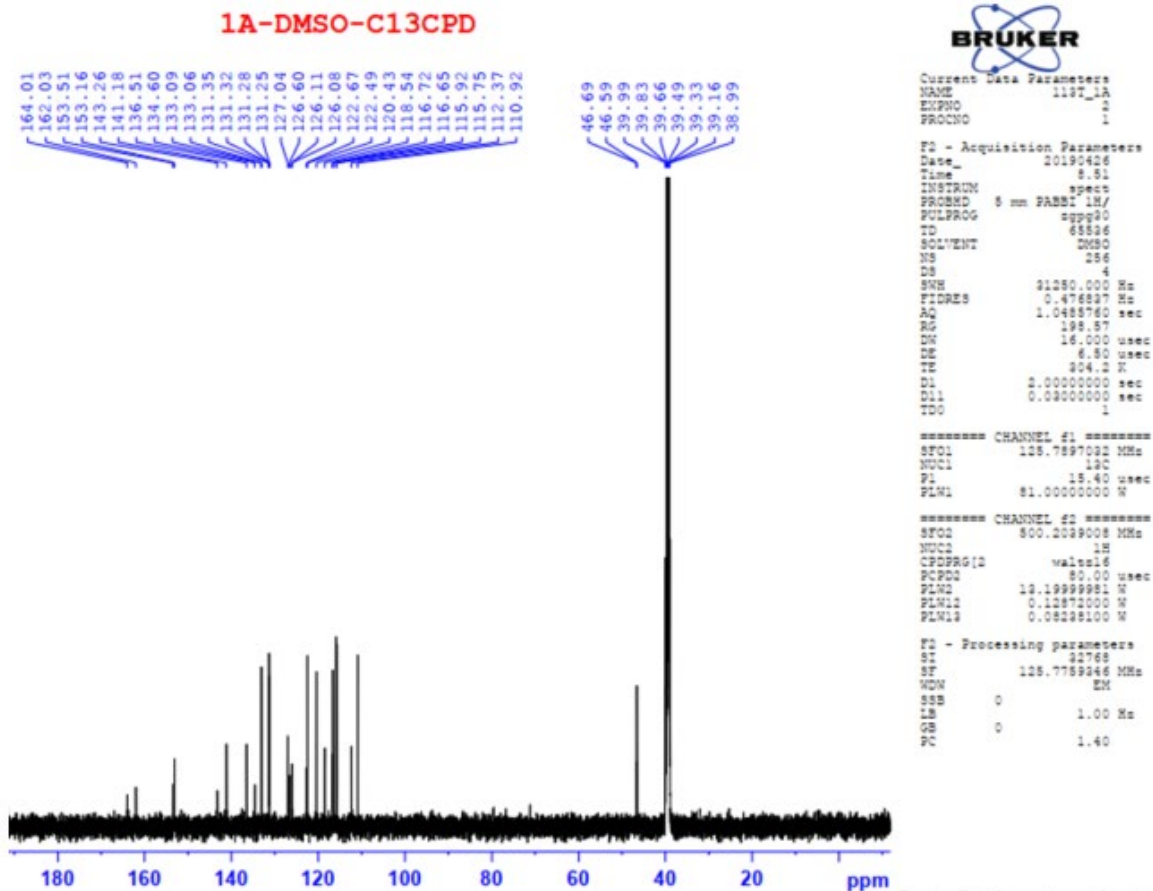

# Compound 3h

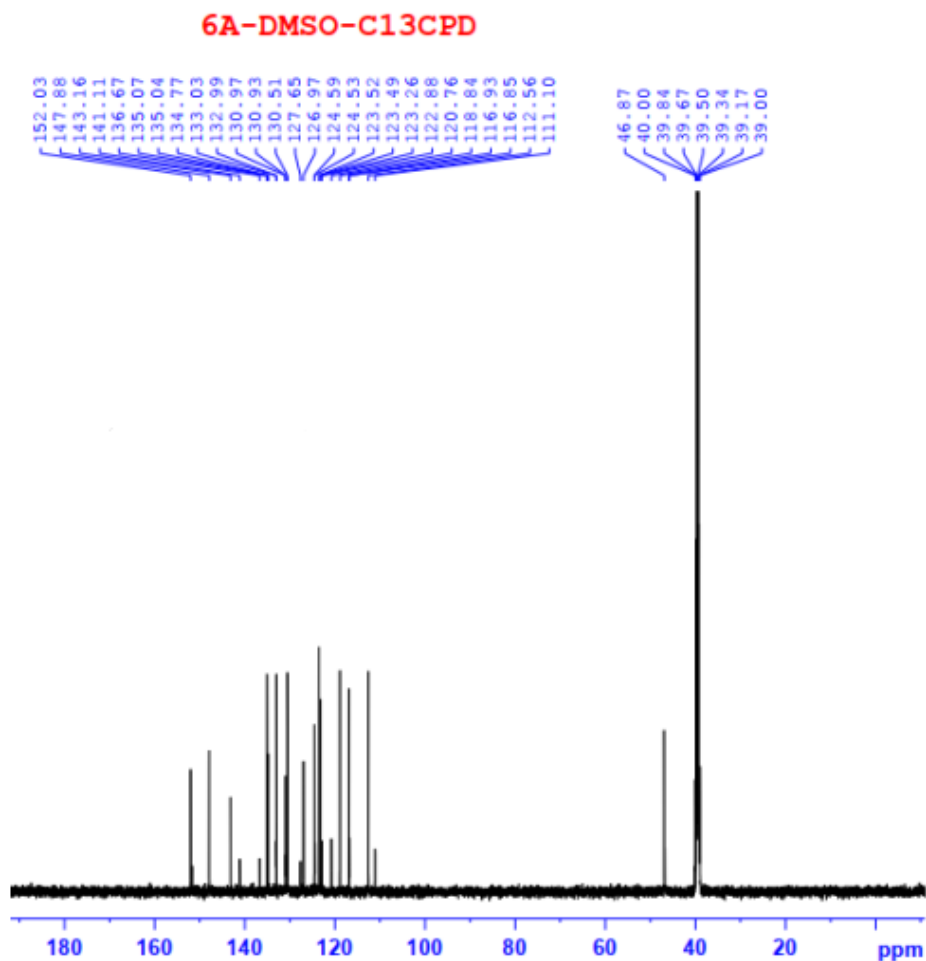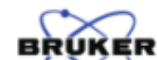

```

Current Data Parameters
NAME      1197_6A
EXPNO     1
PROCNO    1

F2 - Acquisition Parameters
Date_     20190425
Time      18.00
INSTRUM   spect
PROBHD    5 mm PABBI 1H/
PULPROG   zgpg30
ID        65536
SOLVENT   DMSO
NS        256
DS        4
SWH        91280.000 Hz
FIDRES    0.476837 Hz
AQ        1.0488760 sec
RG        198.37
DM        16.000 usec
DE        6.50 usec
TE        304.9 K
D1        2.0000000 sec
D11       0.0300000 sec
TD        1

===== CHANNEL #1 =====
SF01      125.7697092 MHz
NUC1      13C
P1        15.40 usec
PLW1      81.00000000 W

===== CHANNEL #2 =====
SF02      800.2029008 MHz
NUC2      1H
CPDPRG2   waltz16
PCPD2     80.00 usec
PLN2      13.19999981 W
PLW12     0.12872000 W
PLW13     0.08228100 W

F2 - Processing parameters
SI        32768
SF        125.7759327 MHz
WDW       EM
SSB       0
LB        1.00 Hz
GB        0
PC        1.40
    
```



# Compound 3i

## 9A-DMSO-C13CPD

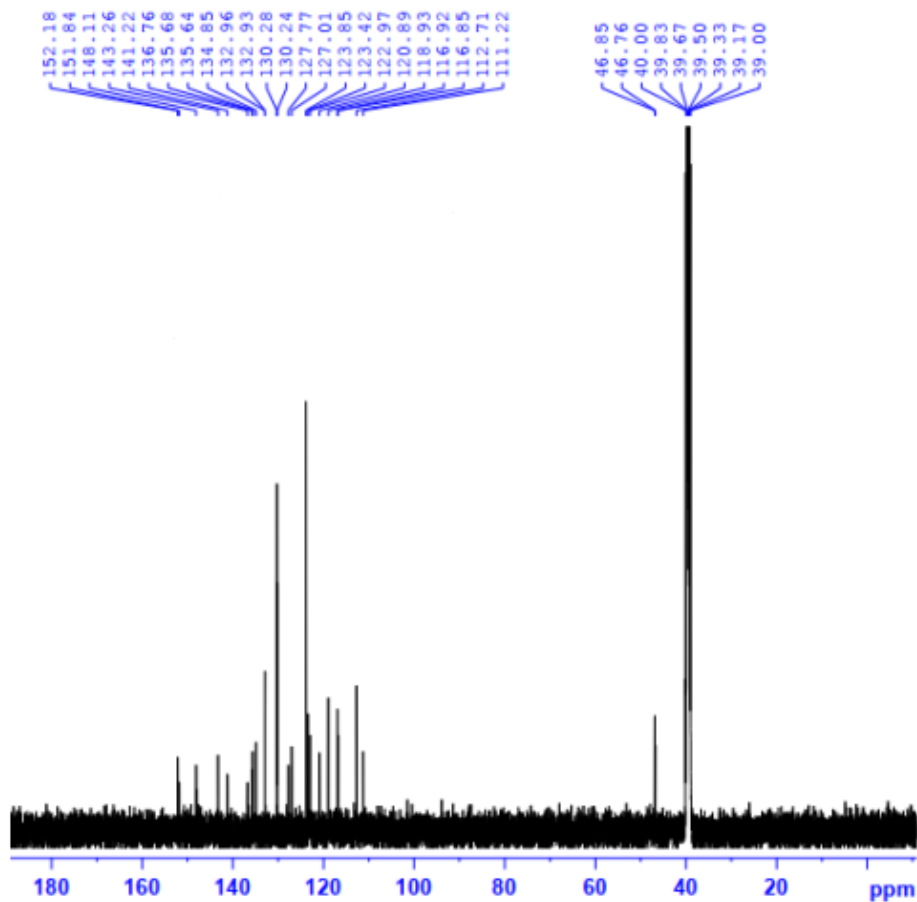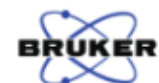

```

Current Data Parameters
NAME      116T_9A
EXPNO    2
PROCNO   1

F2 - Acquisition Parameters
Date_    20190505
Time     9.00
INSTRUM  spect
PROBHD   5 mm PABBI 1H/
PULPROG  zgpg30
TD       65536
SOLVENT  DMSO
NS       2048
DS       4
SWH      31280.000 Hz
FIDRES   0.476837 Hz
AQ       1.0488760 sec
RG       198.57
DN       16.000 usec
DE       8.80 usec
TE       303.2 K
D1       2.00000000 sec
d11      0.02000000 sec
TD0      1

===== CHANNEL f1 =====
SFO1     125.7697022 MHz
NUC1     13C
P1       18.40 usec
PLN1     81.00000000 W

===== CHANNEL f2 =====
SFO2     800.2039008 MHz
NUC2     1H
CPDPRG12 waltz16
PCPDG2   80.00 usec
PLN2     19.19999981 W
PLN12    0.12872000 W
PLN13    0.08298100 W

F2 - Processing parameters
SI       32768
SF       125.7759261 MHz
WDW      EM
SSB      0
LB       1.00 Hz
GB       0
PC       1.40
    
```

# Compound 3j

## 8B-DMSO-C13CPD

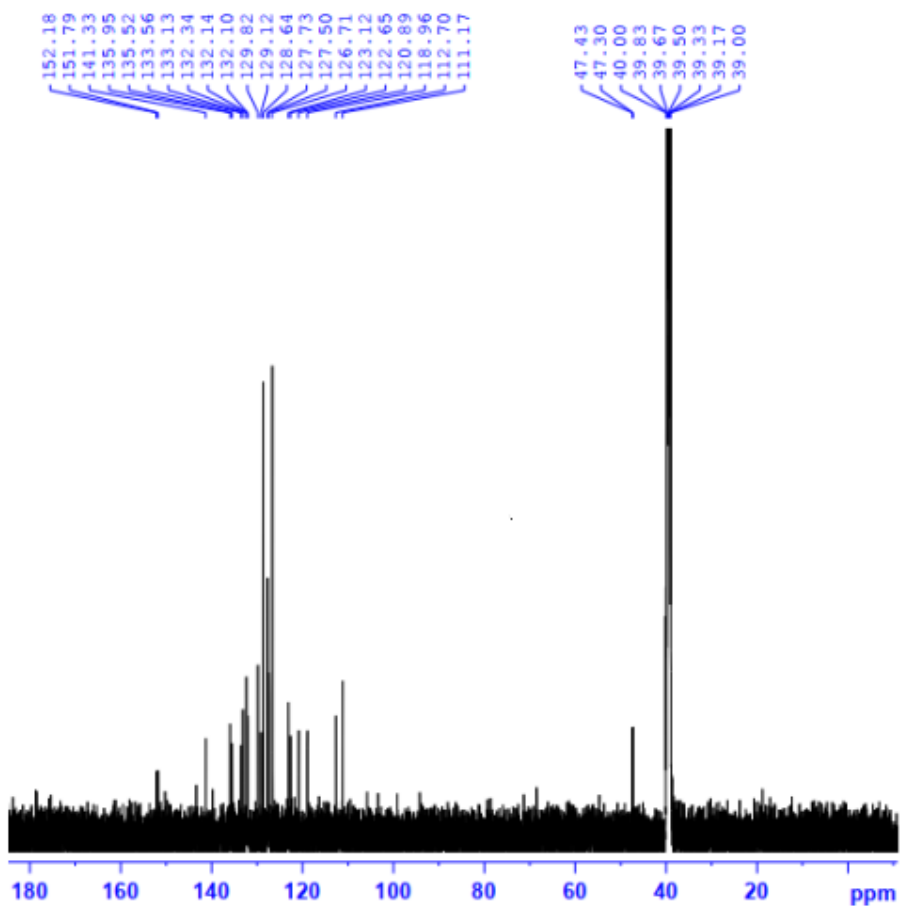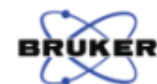

```

Current Data Parameters
NAME          1197_8B
EXPNO         2
PROCNO        1

F2 - Acquisition Parameters
Date_         20190808
Time          8.38
INSTRUM       spect
PROBHD        5 mm PABBI 1H/
PULPROG       zgpg30
TD            65536
SOLVENT       DMSO
NS            2048
DS            4
SMB           31280.000 Hz
FIDRES        0.476837 Hz
AQ            1.0488760 sec
RG            199.87
DM            16.000 usec
DE            6.50 usec
TE            303.5 K
D1            2.00000000 sec
D11           0.03000000 sec
TDO           1

===== CHANNEL f1 =====
SF01          125.7697032 MHz
NUC1           13C
P1            15.40 usec
PLW1          81.00000000 W

===== CHANNEL f2 =====
SF02          500.2019008 MHz
NUC2           1H
CPDPRG12      waltz16
PCPD2         80.00 usec
PLN2          13.19999981 W
PLN12         0.12872000 W
PLN13         0.08228100 W

F2 - Processing parameters
SI            32768
SF            125.7759228 MHz
WDW           EM
SSB           0
LB            1.00 Hz
GB            0
PC            1.40
    
```

# Compound 3k

3B-DMSO-C13CPD

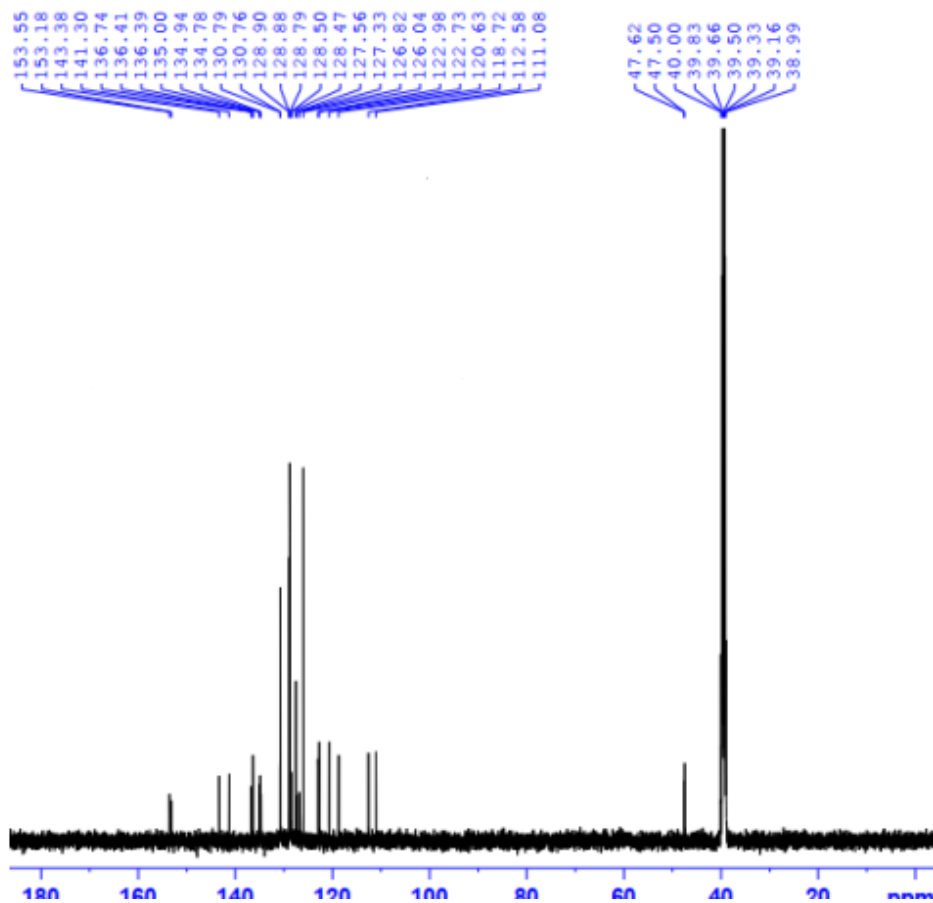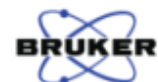

```

Current Data Parameters
NAME      1107_2B
EXPNO     2
PROCNO    1

F2 - Acquisition Parameters
Date_     20190423
Time      19.07
INSTRUM   spect
PROBHD    5 mm PABBI 1H/
PULPROG   zgpg30
TD         65536
SOLVENT   DMSO
NS         256
DS         4
SWH        31250.000 Hz
FIDRES     0.476827 Hz
AQ         1.0485760 sec
RG         198.57
DW         16.000 usec
DE         6.80 usec
TE         304.7 K
D1         2.00000000 sec
D11        0.02000000 sec
TDO        1

===== CHANNEL f1 =====
SFO1      125.7697032 MHz
NUC1       13C
P1         18.40 usec
PLW1       81.00000000 W

===== CHANNEL f2 =====
SFO2      500.1289008 MHz
NUC2       1H
CPCPRG[2]  waltz16
PCPD2     80.00 usec
PLW2      12.19999981 W
PLW12     0.12872000 W
PLW13     0.08228100 W

F2 - Processing parameters
SI         22768
SF         125.7759842 MHz
WDW        EM
SSB        0
LB         1.00 Hz
GB         0
PC         1.40
    
```

# Compound 3l

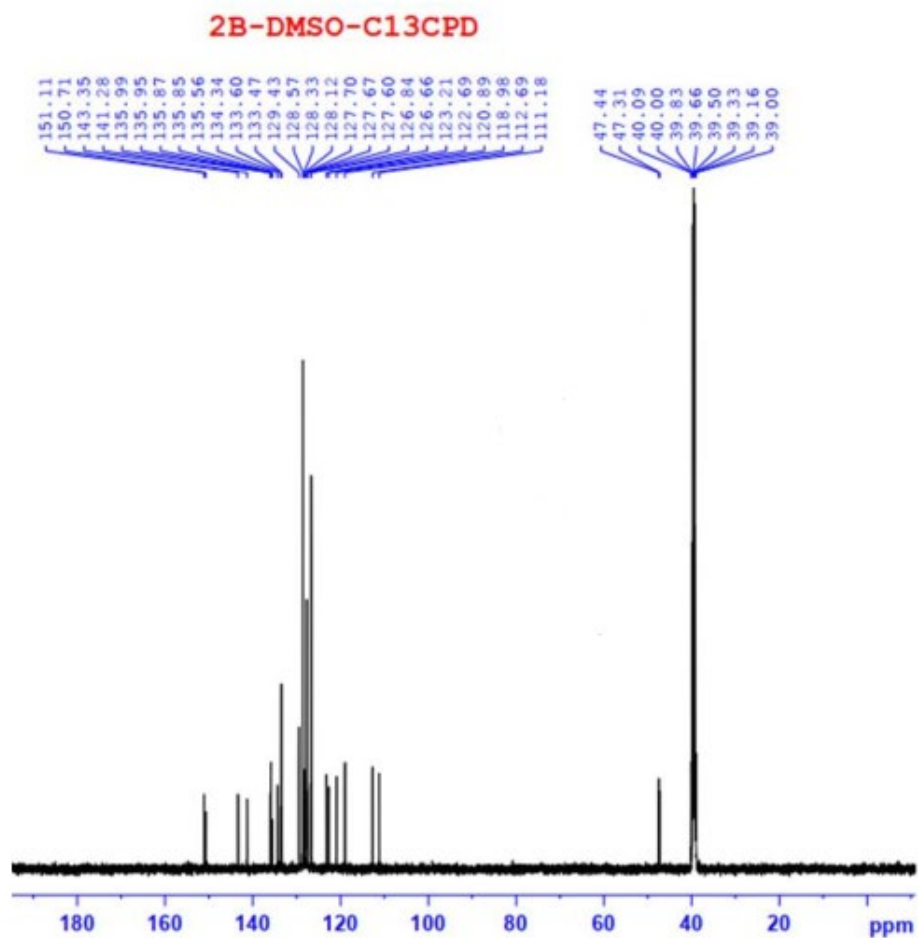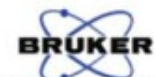

```

Current Data Parameters
NAME      1127_18
EXPNO    2
PROCNO   1

F2 - Acquisition Parameters
Date_    20190425
Time     18.30
INSTRUM  spect
PROBHD   5 mm PABBI 1H/
PULPROG  zgpg30
TD        65536
SOLVENT  DMSO
NS        256
DS        4
SWH       31250.000 Hz
FIDRES    0.476887 Hz
AQ        1.0488760 sec
RG         198.87
DS         18.000 usec
DE         6.90 usec
TE        304.8 K
D1         2.00000000 sec
d11        0.02000000 sec
TDO        1

===== CHANNEL f1 =====
SFO1      125.7697032 MHz
NUC1       13C
P1         18.40 usec
PLW1       81.00000000 W

===== CHANNEL f2 =====
SFO2      500.1329008 MHz
NUC2       1H
CPDPRG12  waltz16
PCPD0     80.00 usec
PLW2      13.19999981 W
PLW3      0.12872000 W
PLW4      0.08228100 W

F2 - Processing parameters
SI         32768
SF         125.7759208 MHz
WDW        EM
SSB        0
LB         1.00 Hz
GB         0
PC         1.40
    
```

# Compound 3m

## 7B-DMSO-C13CPD

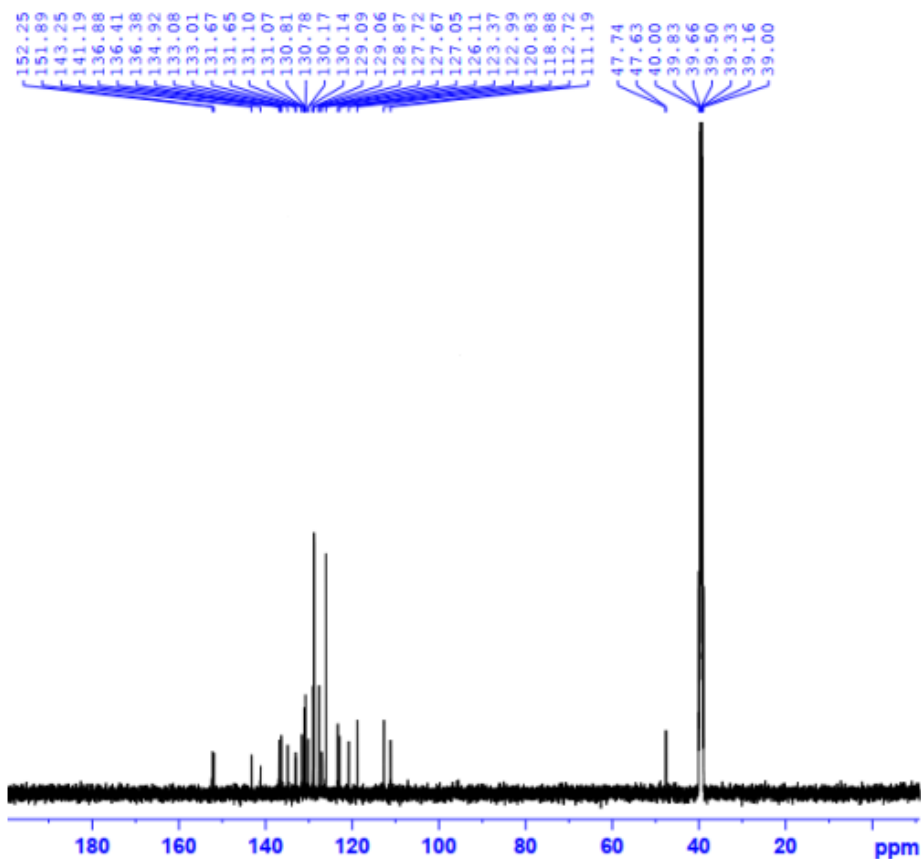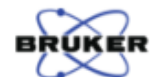

```

Current Data Parameters
NAME      1107_7B
EXPNO    2
PROCNO   1

F2 - Acquisition Parameters
Date_    20190818
Time     20.38
INSTRUM  spect
PROBHD   5 mm PABBI 1H/
PULPROG  zgpg30
TD        65536
SOLVENT  DMSO
NS        512
DS         4
SWH       31250.000 Hz
FIDRES    0.476827 Hz
AQ         1.0485760 sec
RG         198.87
DN         16.000 usec
DE         6.50 usec
TE         308.7 K
D1         2.0000000 sec
d11        0.0300000 sec
TD0        1

***** CHANNEL f1 *****
SFO1      125.7697022 MHz
NUC1       13C
P1         18.40 usec
PLW1       81.0000000 W

***** CHANNEL f2 *****
SFO2      500.2019008 MHz
NUC2       1H
CPDPRG2   waltz16
PCPD2     80.00 usec
PLW2      13.19999981 W
PLW12     0.12872000 W
PLW13     0.08228100 W

F2 - Processing parameters
SI         32768
SF         125.7789282 MHz
WDW        EM
SSB        0
LB         1.00 Hz
GB         0
PC         1.40
    
```

# Compound 3n

## 5B2-DMSO-C13CPD

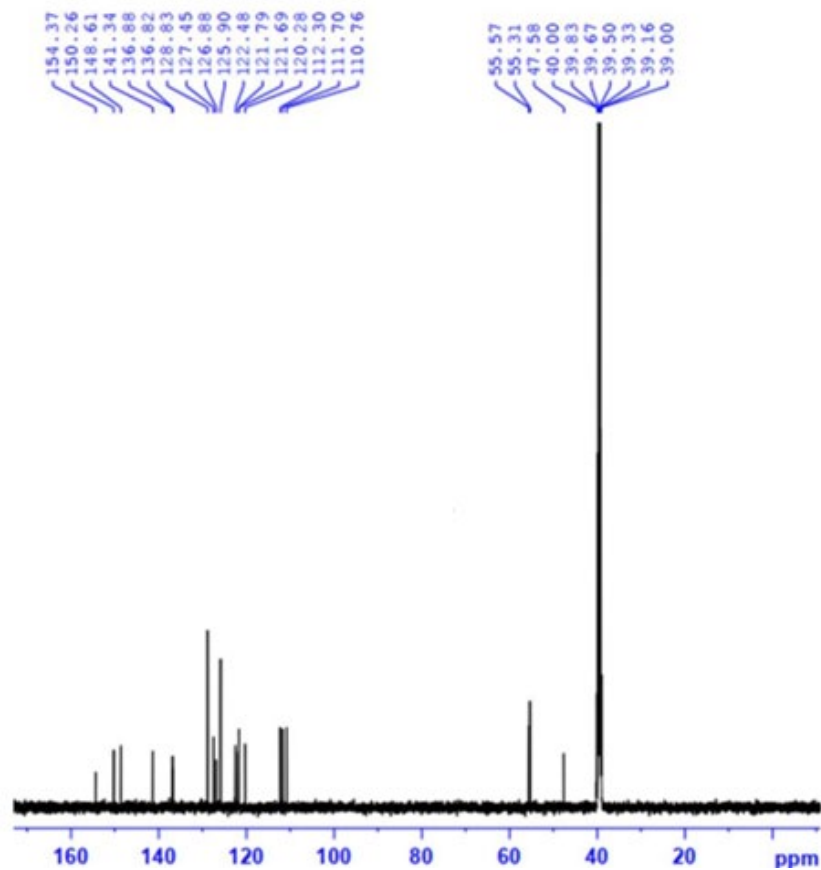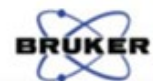

```

Current Data Parameters
NAME      1197_582
EXPNO    2
PROCNO   1

F2 - Acquisition Parameters
Date_    20190426
Time     12.16
INSTRUM  spect
PROBHD   5 mm PABBI 1H/
PULPROG  zgpg30
TD        65536
SOLVENT  DMSO
NS        256
DS        4
SWH       31280.000 KHz
FIDRES   0.476887 KHz
AQ        1.0488760 sec
RG        198.87
DN        16.0000 usec
DE        6.90 usec
TE        304.6 K
D1        2.00000000 sec
d11       0.03000000 sec
TD0       1

===== CHANNEL f1 =====
SFO1     125.7697032 MHz
NUC1     13C
P1       18.40 usec
PLN1     01.00000000 M

===== CHANNEL f2 =====
SFO2     500.2039008 MHz
NUC2     1H
CPCPRG12 waltz16
PCPD2    80.00 usec
PLN2     13.19999981 M
PLN12    0.12872000 M
PLN13    0.08238100 M

F2 - Processing parameters
SI       32768
SF       125.7759326 MHz
WDW      EM
SSB      0
LB       1.00 KHz
GB       0
PC       1.40
    
```

# Compound 3o

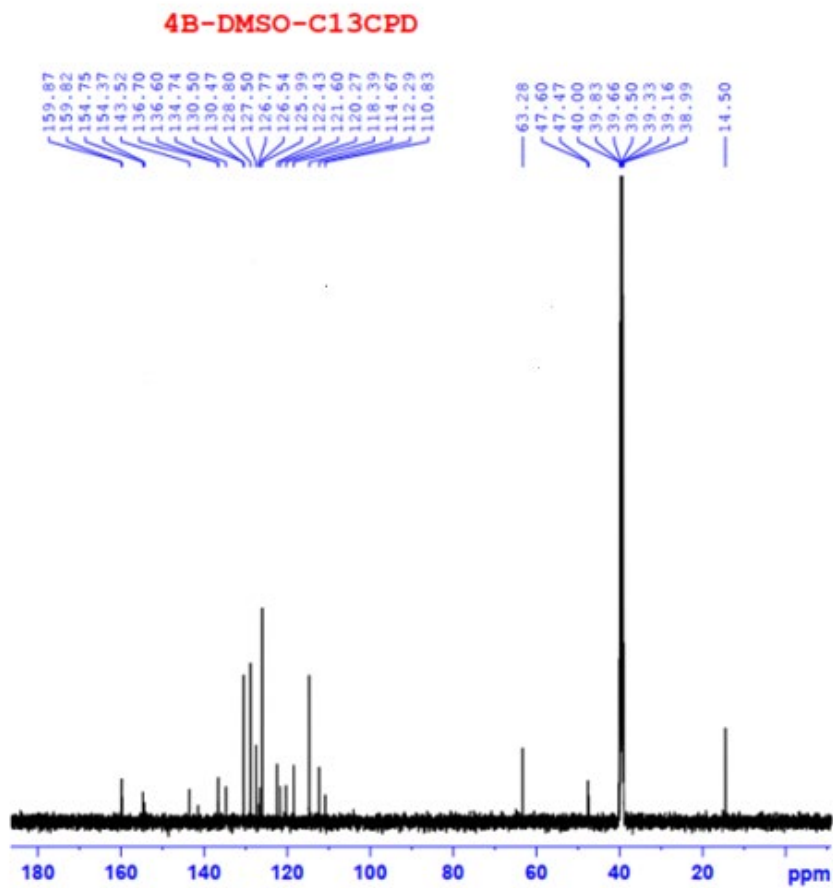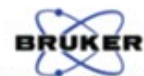

```

Current Data Parameters
NAME      1137_48
EXPNO    1
PROCNO   1

F2 - Acquisition Parameters
Date_    20190426
Time     9.14
INSTRUM spect
PROBHD   5 mm PABBI 1H/
PULPROG zgpg30
TD       65536
SOLVENT  DMSO
NS       256
DS       4
SHE      31280.000 Hz
FIDRES   0.476837 Hz
AQ       1.0485760 sec
RG       198.87
DM       16.000 usec
DE       6.50 usec
TE       303.1 K
D1       2.0000000 sec
D11      0.0200000 sec
TDO      1

***** CHANNEL f1 *****
SFO1    125.7697031 MHz
NUC1     13C
P1       15.40 usec
PLW1     81.0000000 W

***** CHANNEL f2 *****
SFO2    800.2699008 MHz
NUC2     1H
CPOBPRG12 wa13c16
PCPD2    80.00 usec
PLW2     13.19999981 W
PLW12    0.12872000 W
PLW13    0.08238100 W

F2 - Processing parameters
SI       32768
SF       125.7699230 MHz
WDW      EM
SSB      0
LB       1.00 Hz
GB       0
PC       1.40
    
```

# Compound 3p

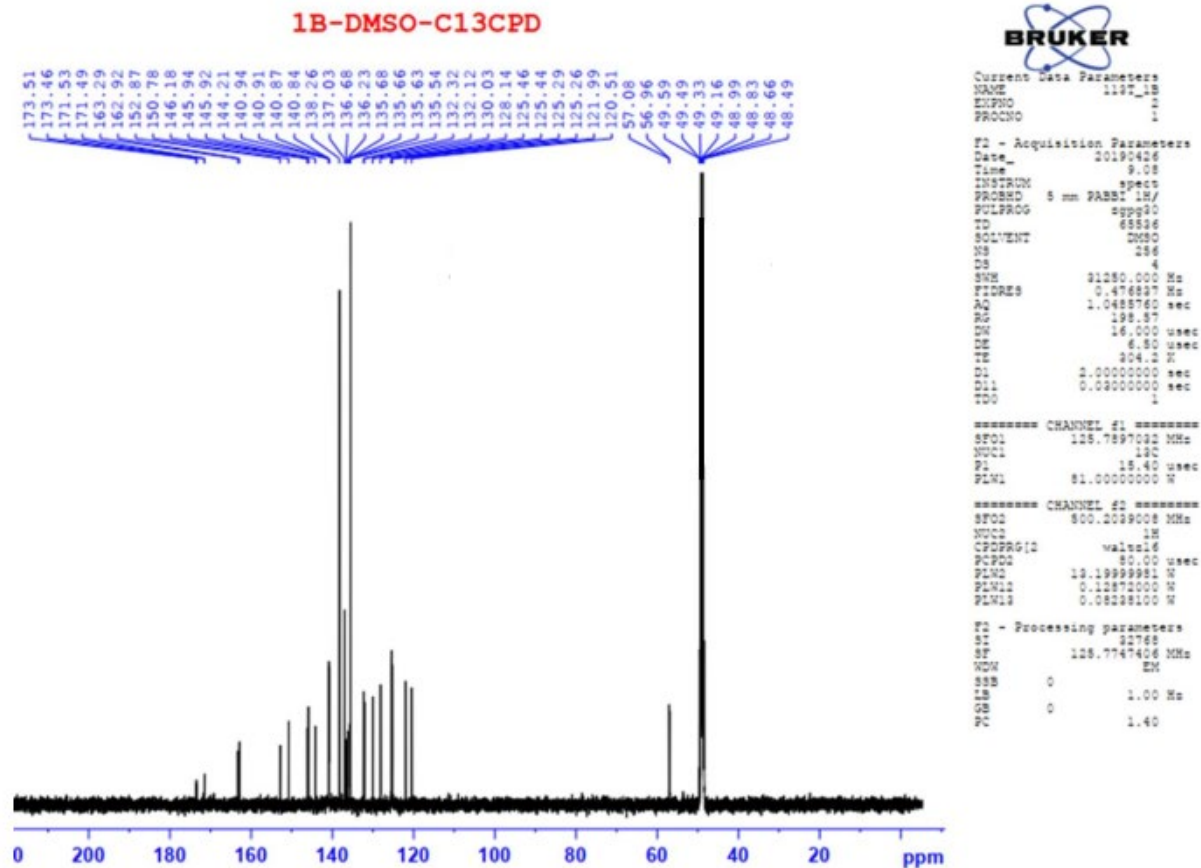



# Compound 3q

## 6B-DMSO-C13CPD

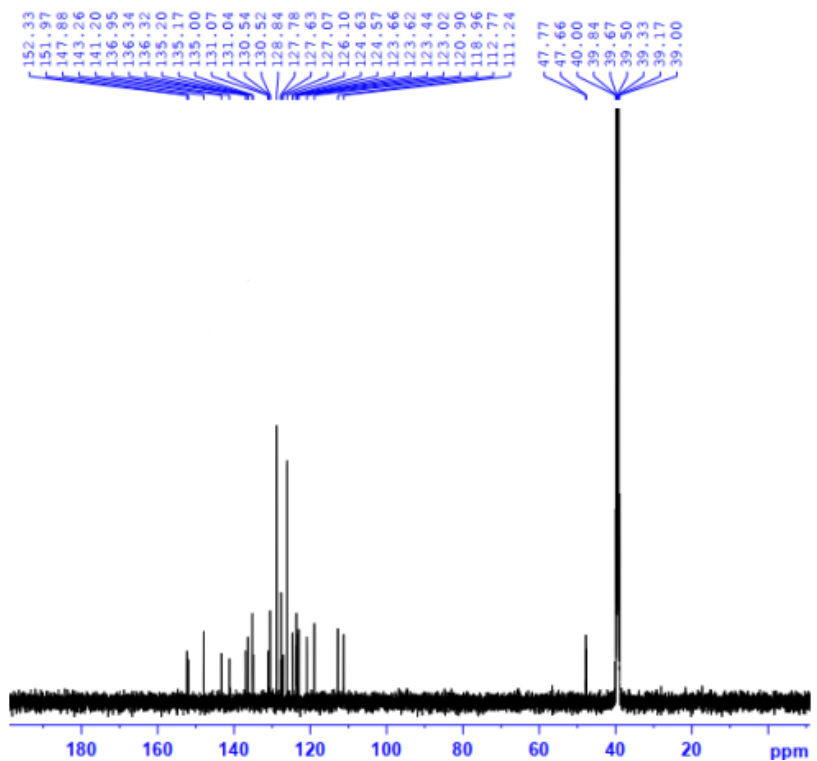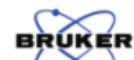

```

Current Data Parameters
NAME          1107_6B
EXPNO         1
PROCNO        1

F2 - Acquisition Parameters
Date_         20190425
Time          19.04
INSTRUM      spect
PROBHD       5 mm PABBI 1H/
PULPROG      zgpg30
ID           65536
SOLVENT      DMSO
NS           256
DS           4
SWH          31250.000 Hz
FIDRES       0.478827 Hz
AQ           1.0488760 sec
RG           198.57
DM           16.000 usec
DE           6.50 usec
TE           304.8 K
D1           2.0000000 sec
d11          0.0200000 sec
TD0          1

===== CHANNEL f1 =====
SF01         125.7597022 MHz
NUC1         13C
P1           19.40 usec
PLW1         81.00000000 W

===== CHANNEL f2 =====
SF02         500.2039008 MHz
NUC2         1H
CPDPRG12    waltz16
PCPD2       80.00 usec
PLW2        12.19999981 W
PLW12       0.12871000 W
PLW13       0.08228100 W

F2 - Processing parameters
SI           32768
SF          125.7759322 MHz
WDW          EM
SSB          0
LB           1.00 Hz
GB           0
PC           1.40
    
```

# Compound 3s

## 5B1-DMSO-C13CPD

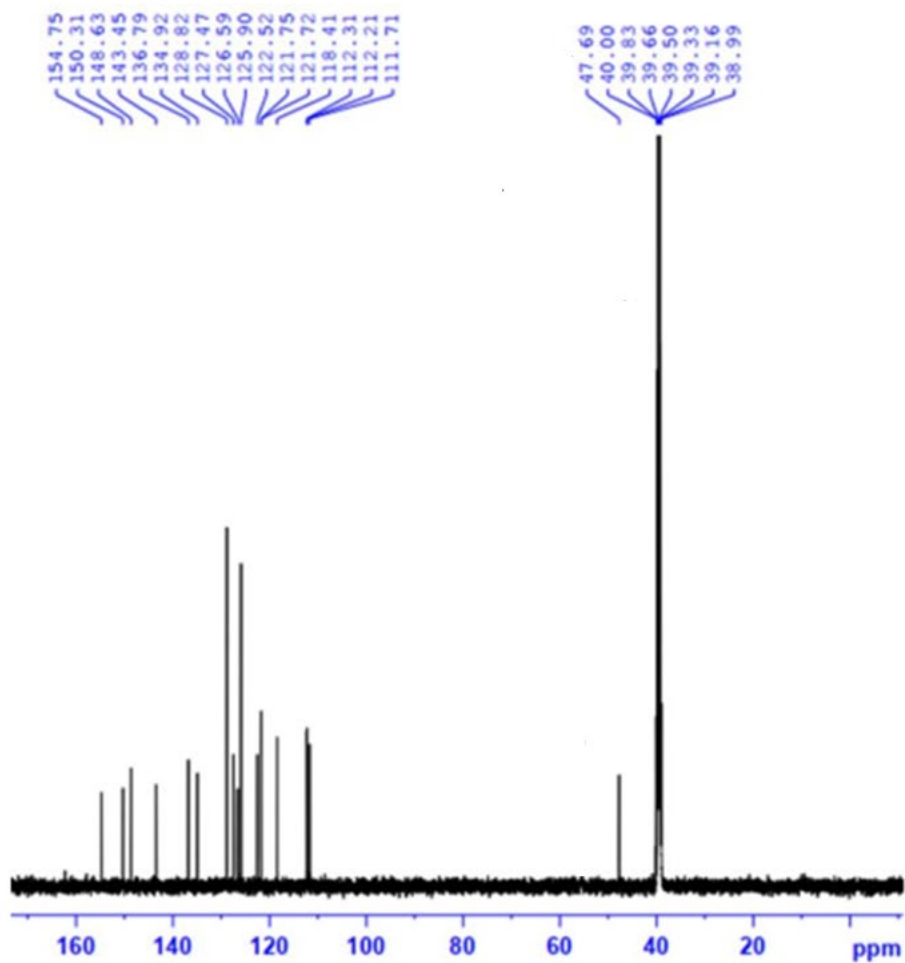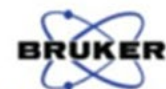

```

Current Data Parameters
NAME      1137_5B1
EXPNO     1
PROCNO    1

F2 - Acquisition Parameters
Date_     20190426
Time      8.18
INSTRUM   spect
PROBHD    5 mm PABBI 1H/
PULPROG   zgpg30
TD         65536
SOLVENT   DMSO
NS         256
DS         4
SWH        21250.000 Hz
FIDRES     0.476837 Hz
AQ         1.04885760 sec
RG         198.87
DN         16.000 usec
TE         304.2 K
DE         6.50 usec
TE2        304.2 K
D1         2.00000000 sec
dD1        0.03000000 sec
TD0        1

===== CHANNEL f1 =====
STO1      125.7697031 MHz
NUC1       13C
P1         15.40 usec
PLW1       01.00000000 W

===== CHANNEL f2 =====
STO2      500.1362008 MHz
NUC2       1H
CQDPRG12  waltz16
PCPD1     80.00 usec
PLW2      15.19999981 W
PLW12     0.12872000 W
PLW13     0.08228100 W

F2 - Processing parameters
SI         32768
SF         125.7693218 MHz
WDW        EM
SSB        0
LB         1.00 Hz
GB         0
PC         1.40
    
```

# Compound 3t

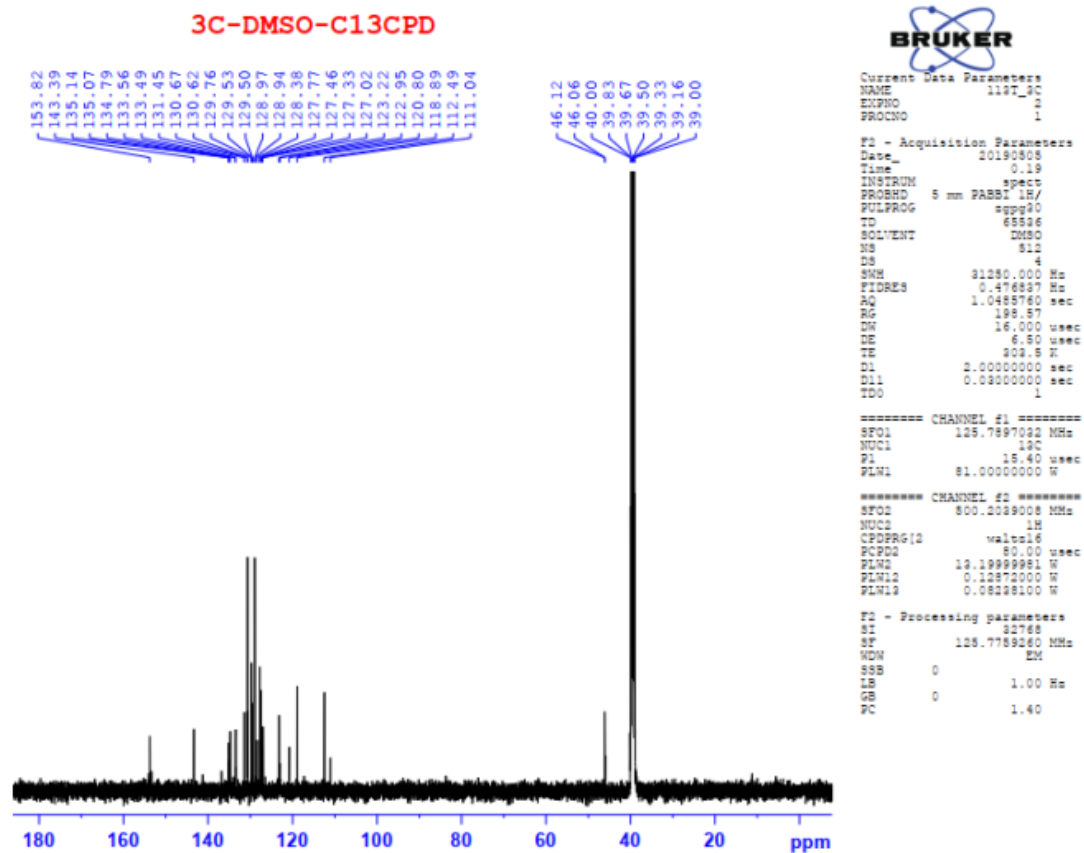

# Compound 3w

3D1-DMSO-C13CPD

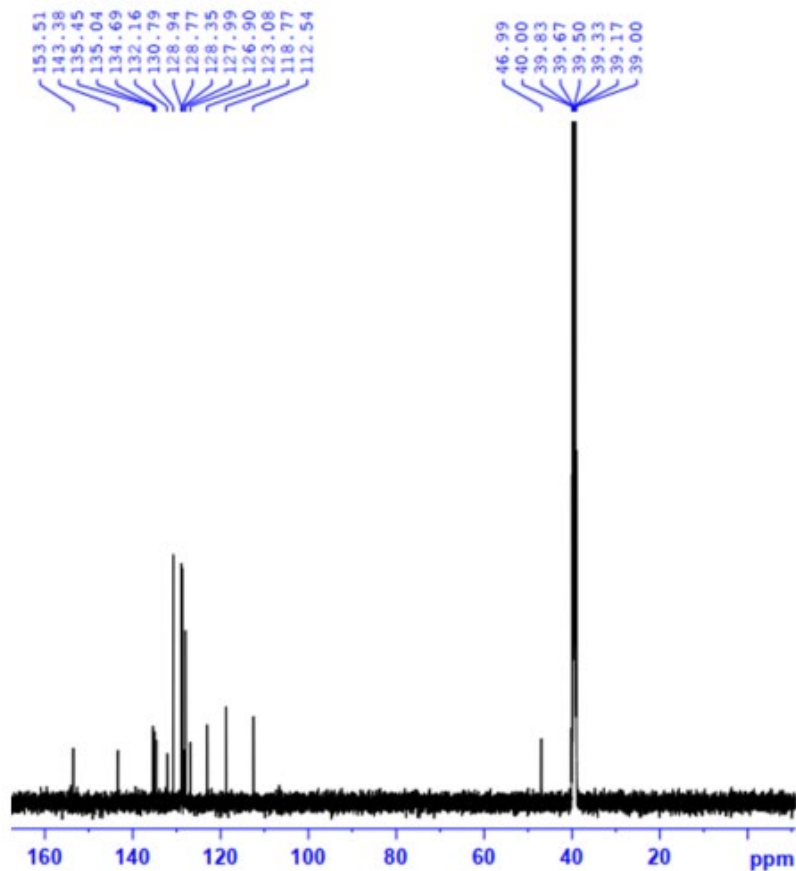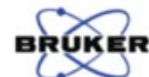

```

Current Data Parameters
NAME      1197_3D1
EXPNO     2
PROCNO    1

F2 - Acquisition Parameters
Date_     20190426
Time      8.01
INSTRUM   spect
PROBHD    5 mm F40X1H/
PULPROG   zgpg30
TD        65536
SOLVENT   DMSO
NS        512
DS         4
SWH        31250.000 Hz
FIDRES     0.476897 Hz
AQ         1.0485760 sec
RG         198.87
DN         16.000 usec
DE         6.50 usec
TE         304.2 K
D1         2.00000000 sec
D11        0.02000000 sec
TDC        1

===== CHANNEL f1 =====
SF01      125.7697032 MHz
NUC1       13C
P1         15.40 usec
PLW1       01.00000000 W

===== CHANNEL f2 =====
SF02      500.2029008 MHz
NUC2       1H
CPDPRG12  waltz16
PCPD1      80.00 usec
PLW2       12.19999981 W
PLW12      0.12872000 W
PLW13      0.08228100 W

F2 - Processing parameters
SI         32768
SF         125.7759242 MHz
WDW        EM
SSB        0
GB         0
PC         1.40
    
```

# Compound 3x

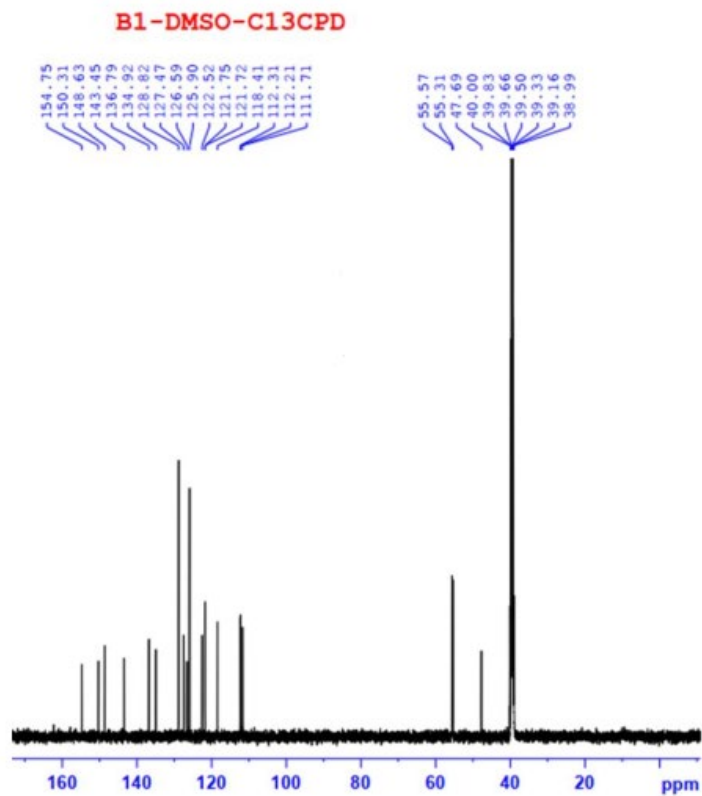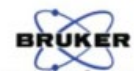

```

Current Data Parameters
NAME      1101_001
EXPNO     2
PROCNO    1

F2 - Acquisition Parameters
Date_     20190426
Time      8.18
INSTRUM   spect
PROBHD    5 mm PABBI LN/
PULPROG   zgpg30
TD         65536
SOLVENT   DMSO
NS         256
DS         4
SWE        31250.000 Hz
FIDRES    0.476897 Hz
AQ         1.0485760 sec
RG         198.87
DM         16.0000 usec
DE         6.50 usec
TE         304.2 K
SI         2.0000000 sec
SLL        0.0000000 sec
TDO        1

===== CHANNEL f1 =====
SF01      125.7697002 MHz
NUC1       13C
PC1        15.40 usec
PL1        01.0000000 W

===== CHANNEL f2 =====
SF02      500.1309008 MHz
NUC2       1H
CPDPRG2   waltz16
PCPD2     80.00 usec
PLM2      13.19999981 W
PLM12     0.12872000 W
PLM13     0.08288100 W

F2 - Processing parameters
SI         32768
SF         125.7789218 MHz
SFO        5M
SSB        0
LB         1.00 Hz
GB         0
PC         1.40
    
```

# Compound 4a

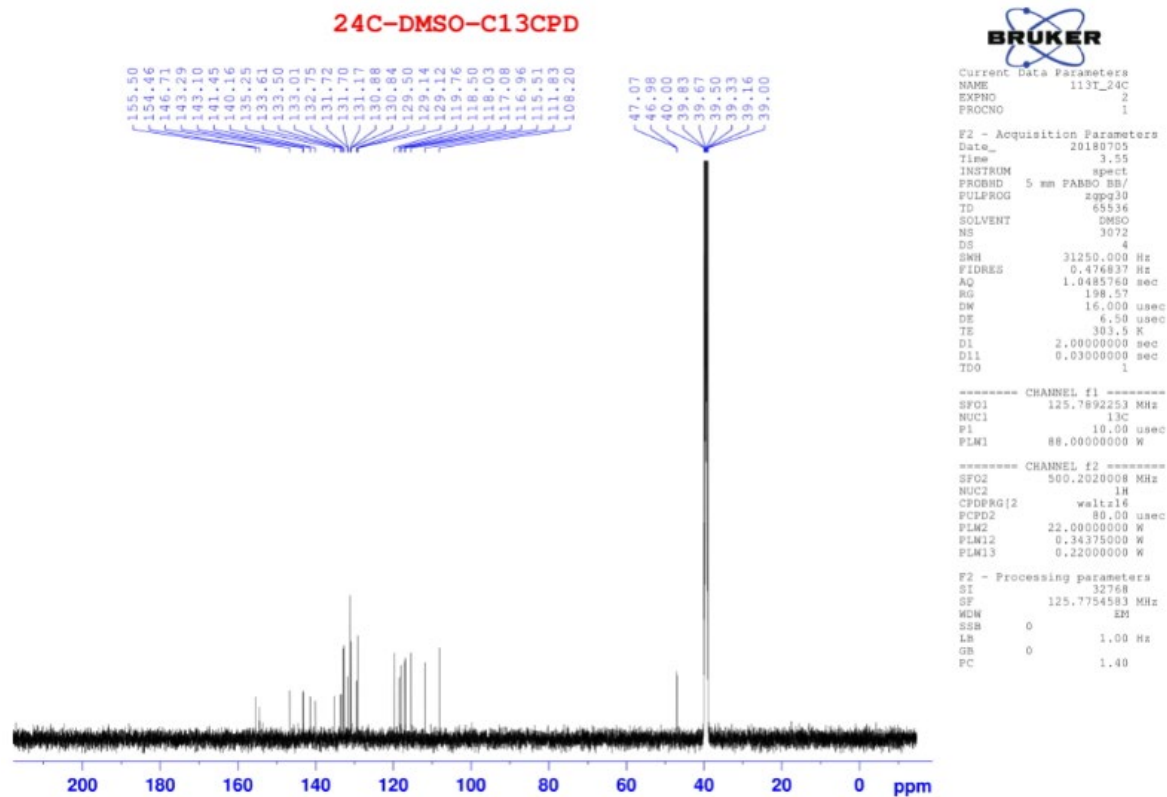

# Compound 4b

D34C-DMSO-C13CPD

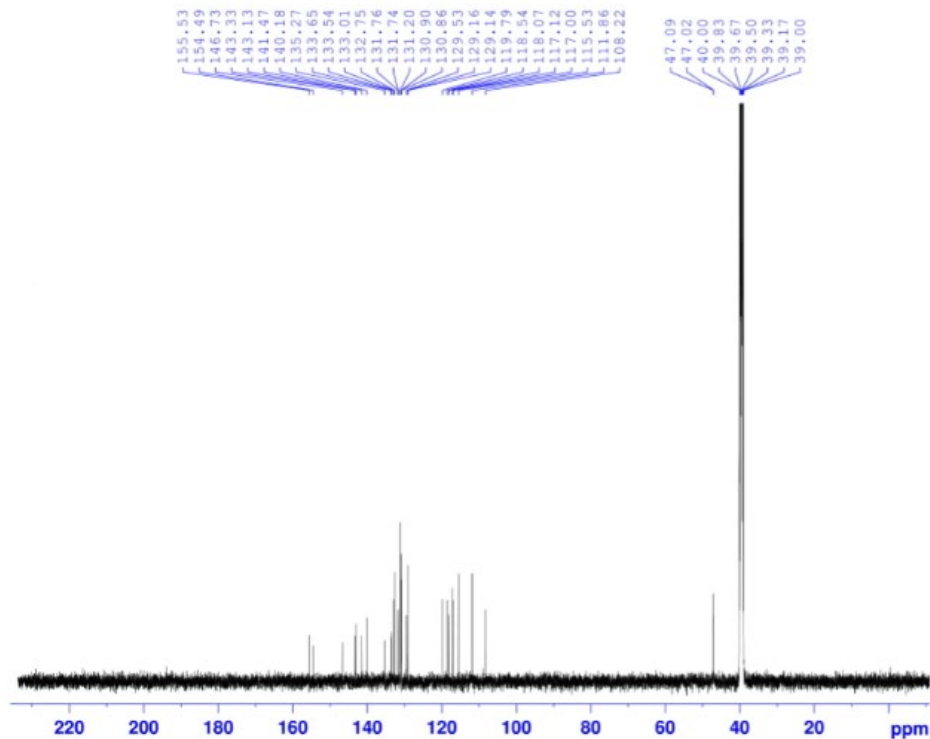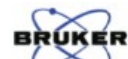

```

Current Data Parameters
NAME      1131_D34C
EXPNO     2
PROCNO    1

F2 - Acquisition Parameters
Date_     20180716
Time      5.05
INSTRUM   spect
PROBHD    5 mm PABBO BB/
PULPROG   zgpg30
TD         65536
SOLVENT   DMSO
NS         2048
DS         4
SWH        31250.000 Hz
FIDRES     0.476827 Hz
AQ         1.0485760 sec
RG         198.57
DK         16.000 usec
DE         6.50 usec
TE         304.7 K
D1         2.0000000 sec
D11        0.0300000 sec
TDO        1

----- CHANNEL f1 -----
SFO1      125.7892253 MHz
NUC1       13C
P1         10.00 usec
PLM1       88.0000000 W

----- CHANNEL f2 -----
SFO2      500.2020008 MHz
NUC2       1H
CPDPRG[2] waltz16
PCPD2      80.00 usec
PLM2       22.0000000 W
PLM12      0.34375000 W
PLM13      0.22000000 W

F2 - Processing parameters
SI         32768
SF         125.7754547 MHz
WDW        EM
SSB        0
LB         1.00 Hz
GB         0
PC         1.40
    
```

# Compound 4c

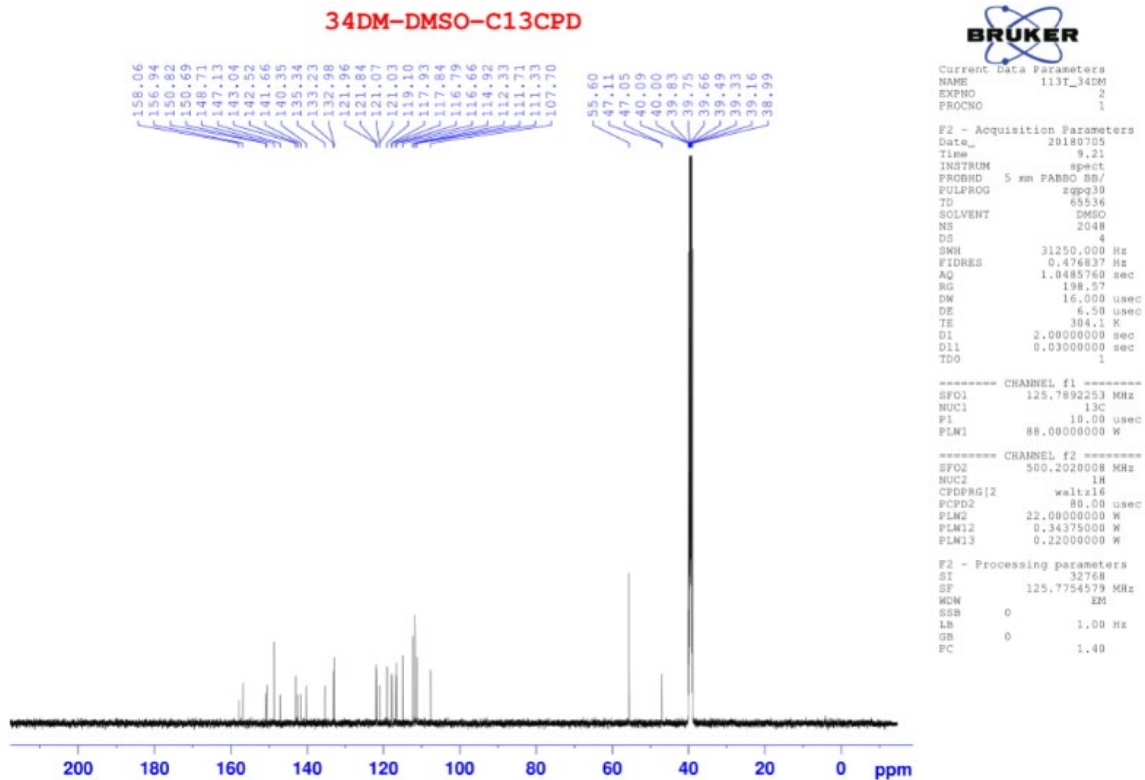



# Compound 4d

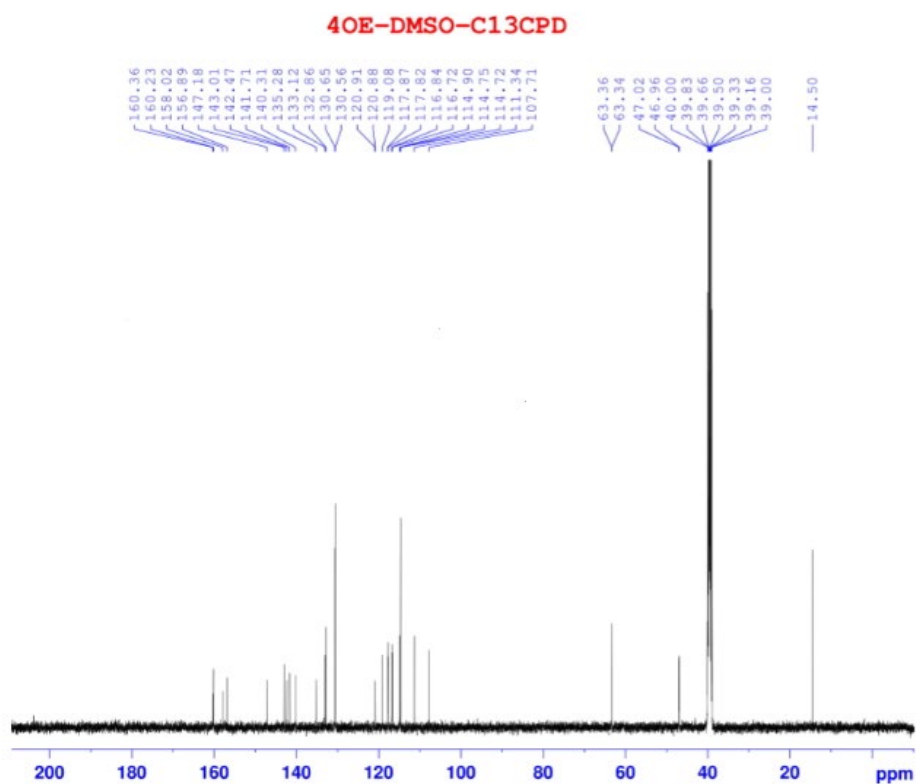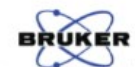

Current Data Parameters  
 NAME 1131\_40E  
 EXPNO 2  
 PROCNO 1

F2 - Acquisition Parameters  
 Date\_ 20180705  
 Time 11.41  
 INSTRUM spect  
 PROBHD 5 mm FABS0 BB/  
 PULPROG zgpg30  
 TD 65536  
 SOLVENT DMSO  
 NS 2048  
 DS 4  
 SWH 31250.000 Hz  
 FIDRES 0.474837 Hz  
 AQ 1.0485760 sec  
 RG 198.57  
 DW 16.000 usec  
 DE 4.50 usec  
 TE 303.8 K  
 D1 2.0000000 sec  
 D11 0.0300000 sec  
 TDO 1

----- CHANNEL f1 -----  
 SF01 125.7892253 MHz  
 NUC1 13C  
 P1 10.00 usec  
 PLM1 88.0000000 W

----- CHANNEL f2 -----  
 SF02 500.2020008 MHz  
 NUC2 1H  
 CPDPRG2 waltz16  
 PCPD2 80.00 usec  
 PLM2 22.0000000 W  
 PLM12 0.34375000 W  
 PLM13 0.22000000 W

F2 - Processing parameters  
 SI 32768  
 SF 125.7754572 MHz  
 MDW 3M  
 SSB 0  
 LB 1.00 Hz  
 GB 0  
 PC 1.40

# Compound 4e

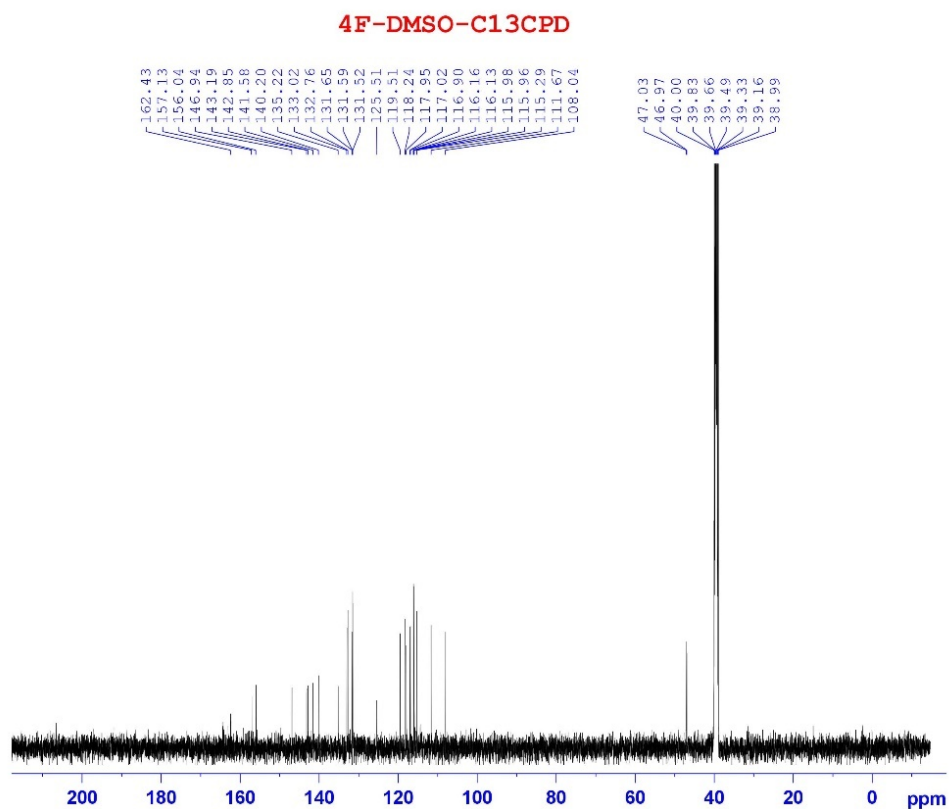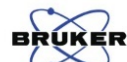

Current Data Parameters  
NAME: 4F-DMSO-C13CPD  
EXPNO: 2  
PROCNO: 1

----- Acquisition Parameters -----  
Date\_ 20180705  
Time 14.38  
INSTRUM spect  
PROBHD 5 mm PARBO BB/  
PULPROG zgpg30  
TD 65536  
SOLVENT DMSO  
NS 2048  
DS 4  
SWH 31250.000 Hz  
FIDRES 0.476837 Hz  
AQ 1.0465760 sec  
RG 186.57  
DN 16.000 usec  
DF 6.20 usec  
TE 303.2 K  
DE 2.0000000 sec  
D11 0.0300000 sec  
F0 125.7682253 MHz

----- CHANNEL f1 -----  
NUC1 13C  
P1 10.00 usec  
PL1 86.0000000 W

----- CHANNEL f2 -----  
NUC2 1H  
CPCPRG12 Waltz16  
PCPD2 80.00 usec  
P2P 22.0000000 W  
PLW2 0.34375000 W  
PLW3 0.22000000 W

----- Processing parameters -----  
SI 32768  
SF 125.7754319 MHz  
WDW EM  
SSB 0  
B 1.00 Hz  
GB 0  
GC 1.40

# Compound 4f

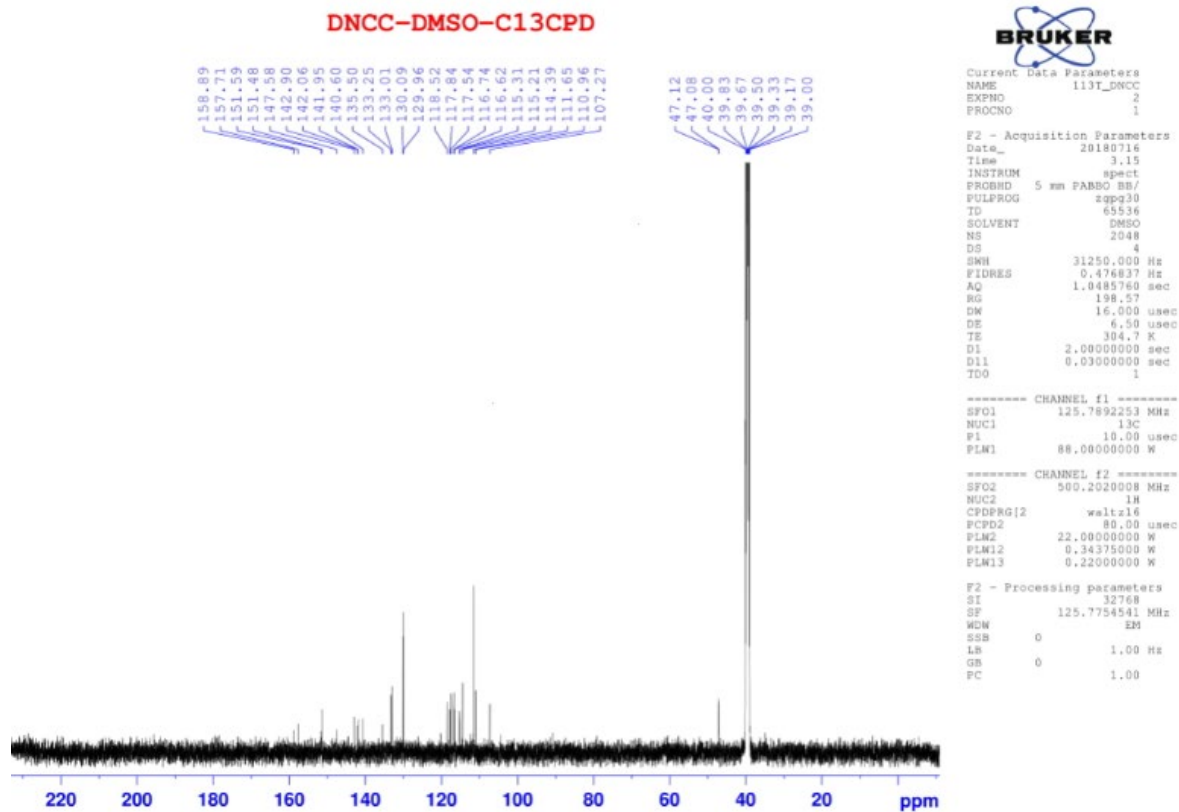

# Compound 4k

0B-DMSO-C13PD

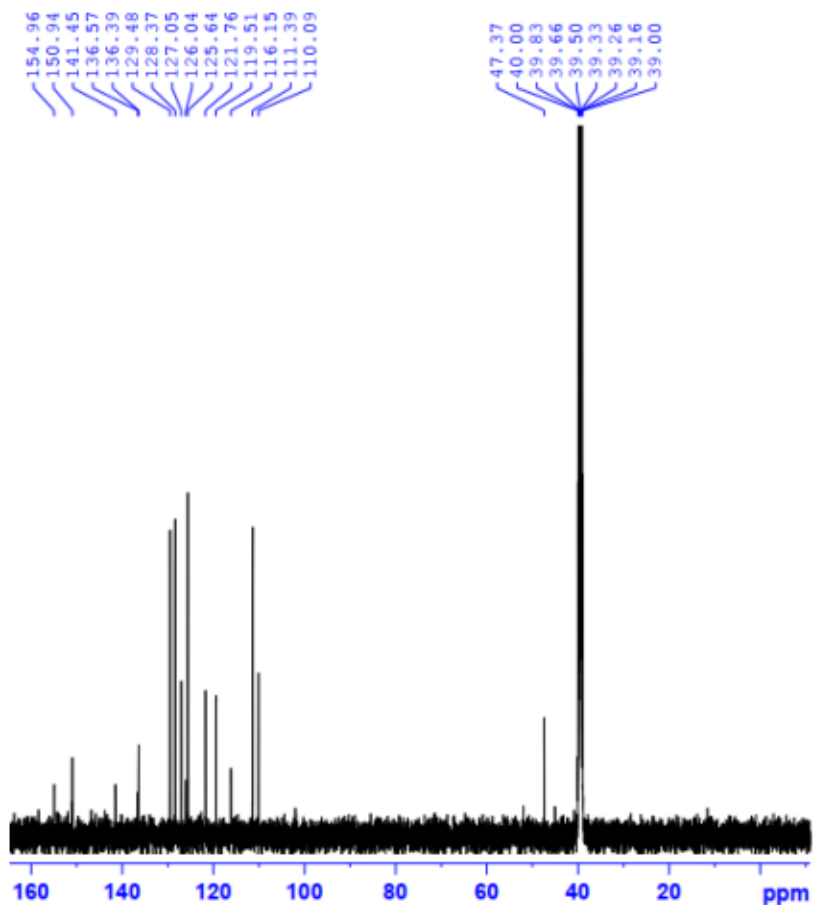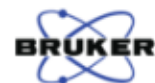

```

Current Data Parameters
NAME      119T_10B
EXPNO    2
PROCNO   1

F2 - Acquisition Parameters
Date_    20190819
Time     12.30
INSTRUM spect
PROBHD   5 mm PABBI 1H/
PULPROG zgpg30
TD       65536
SOLVENT  DMSO
NS       2048
DS       4
SNH      31250.000 Hz
FIDRES   0.4768837 Hz
AQ       1.0488760 sec
RG       198.87
DN       16.000 usec
DE       6.50 usec
TE       303.0 K
D1       2.00000000 sec
D11      0.02000000 sec
TD0      1

===== CHANNEL #1 =====
SF01     125.7697031 MHz
NUC1     13C
P1       15.40 usec
PLW1     81.00000000 W

===== CHANNEL #2 =====
SF02     500.2039008 MHz
NUC2     1H
CPDPRG2  waltz16
PCPD02  80.00 usec
PLW2     13.19999981 W
PLW12    0.12872000 W
PLW13    0.082288100 W

F2 - Processing parameters
SI       32768
SF       125.7759779 MHz
WDW      EM
SSB      0
LB       1.00 Hz
GB       0
PC       1.40
    
```

# Compound 4p

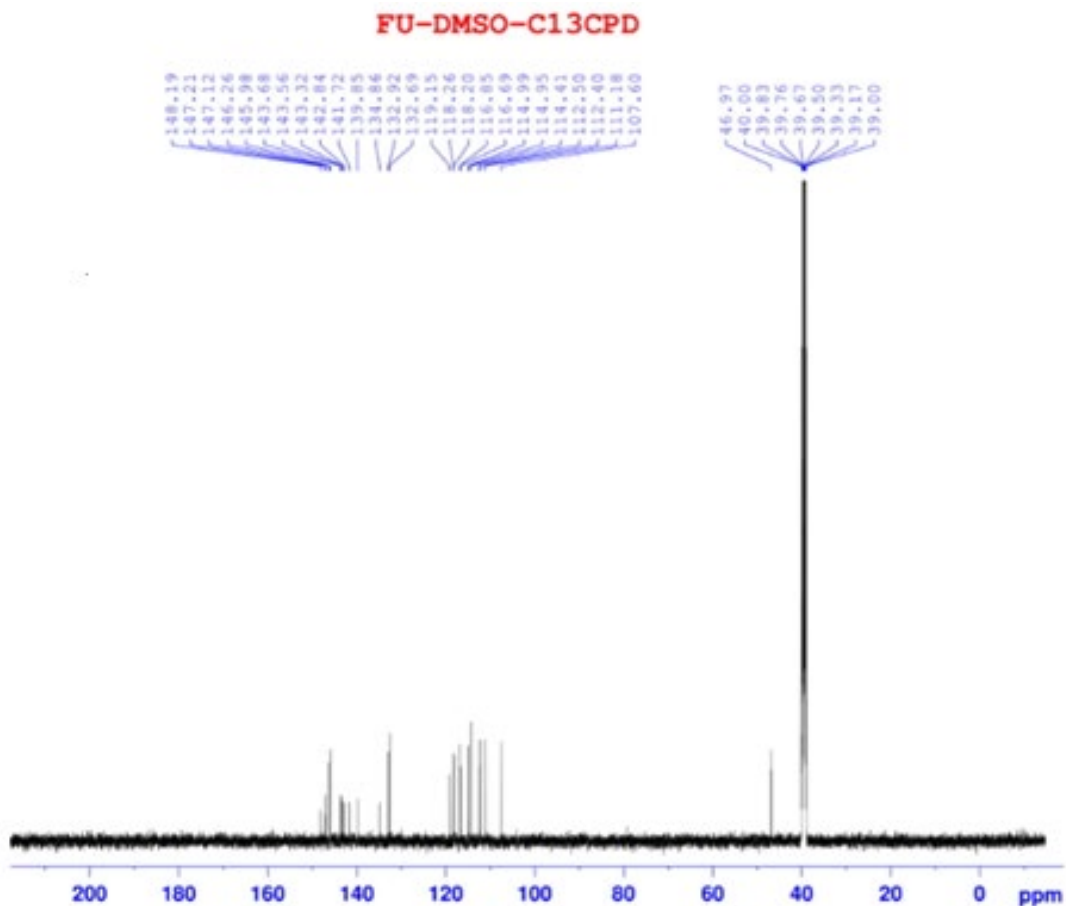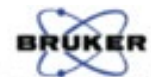

```

Current Data Parameters
NAME      1137_FU
EXPNO    2
PROCNO   1

F2 - Acquisition Parameters
Date_    20180705
Time     7.32
INSTRUM  spect
PROBHD   5 mm ZAMBO BB7
PULPROG  zgpg30
TD       65536
SOLVENT  DMSO
NS       2048
DS       4
SWH      31250.000 Hz
FIDRES   0.474837 Hz
AQ       1.9485760 sec
RG       198.57
DW       16.000 usec
DE       6.58 usec
TE       304.1 K
D1       2.0000000 sec
D11      0.0300000 sec
TD0      1

----- CHANNEL f1 -----
SFO1    125.7692253 MHz
NUC1     13C
P1      10.00 usec
PLW1    80.0000000 W

----- CHANNEL f2 -----
SFO2    500.2028008 MHz
NUC2     1H
CPDPRG2  waltz16
PCPD2    80.00 usec
PLW2    22.0000000 W
PLW12   0.34375000 W
PLW13   0.22000000 W

F2 - Processing parameters
SI       32768
SF       125.7754572 MHz
WCW      8Hz
SSB      0
LB       1.00 Hz
GB       0
PC       1.40
    
```

# THE CONCENTRATION-RESPONSE CURVES FOR IC<sub>50</sub> VALUES

(ANTICANCER ACTIVITY)

| Compound  | HepG2                                                                               | MDA-MB-231                                                                          | MCF7                                                                                  | C26                                                                                   | RMS                                                                                   |
|-----------|-------------------------------------------------------------------------------------|-------------------------------------------------------------------------------------|---------------------------------------------------------------------------------------|---------------------------------------------------------------------------------------|---------------------------------------------------------------------------------------|
| <b>1a</b> | 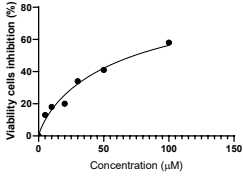   |    |    |    |    |
|           | $R^2 = 0.9777$                                                                      | $R^2 = 0.9951$                                                                      | $R^2 = 0.9843$                                                                        | $R^2 = 0.9887$                                                                        | $R^2 = 0.9711$                                                                        |
| <b>1b</b> |    |    |    |    |    |
|           | $R^2 = 0.9818$                                                                      | $R^2 = 0.9381$                                                                      | $R^2 = 0.9729$                                                                        | $R^2 = 0.9202$                                                                        | $R^2 = 0.9723$                                                                        |
| <b>1c</b> |  |  |  |  |  |
|           | $R^2 = 0.9760$                                                                      | $R^2 = 0.9722$                                                                      | $R^2 = 0.9694$                                                                        | $R^2 = 0.9669$                                                                        | $R^2 = 0.9812$                                                                        |

|    |                                                                                     |                                                                                     |                                                                                       |                                                                                       |                                                                                       |
|----|-------------------------------------------------------------------------------------|-------------------------------------------------------------------------------------|---------------------------------------------------------------------------------------|---------------------------------------------------------------------------------------|---------------------------------------------------------------------------------------|
| 1d | 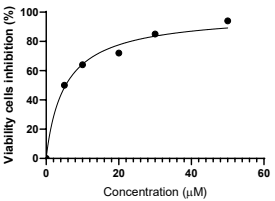   |    |    |    |    |
|    | $R^2 = 0.9894$                                                                      | $R^2 = 0.9970$                                                                      | $R^2 = 0.9685$                                                                        | $R^2 = 0.9785$                                                                        | $R^2 = 0.9879$                                                                        |
| 1e |    |    |    |    |    |
|    | $R^2 = 0.9838$                                                                      | $R^2 = 0.9425$                                                                      | $R^2 = 0.9805$                                                                        | $R^2 = 0.9552$                                                                        | $R^2 = 0.9932$                                                                        |
| 1f |    |    |    |    |    |
|    | $R^2 = 0.9745$                                                                      | $R^2 = 0.9953$                                                                      | $R^2 = 0.9721$                                                                        | $R^2 = 0.9594$                                                                        | $R^2 = 0.9921$                                                                        |
| 1g |   |   |   |   |   |
|    | $R^2 = 0.9881$                                                                      | $R^2 = 0.9798$                                                                      | $R^2 = 0.9751$                                                                        | $R^2 = 0.9674$                                                                        | $R^2 = 0.9840$                                                                        |
| 1h |  |  |  |  |  |
|    | $R^2 = 0.9633$                                                                      | $R^2 = 0.9801$                                                                      | $R^2 = 0.9971$                                                                        | $R^2 = 0.9799$                                                                        | $R^2 = 0.9554$                                                                        |

|           |                                                                                     |                                                                                     |                                                                                       |                                                                                       |                                                                                       |
|-----------|-------------------------------------------------------------------------------------|-------------------------------------------------------------------------------------|---------------------------------------------------------------------------------------|---------------------------------------------------------------------------------------|---------------------------------------------------------------------------------------|
| <b>1i</b> | 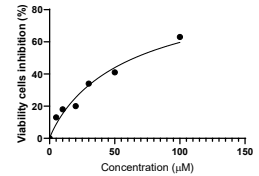   |    |    |    |    |
|           | $R^2 = 0.9710$                                                                      | $R^2 = 0.9922$                                                                      | $R^2 = 0.9629$                                                                        | $R^2 = 0.9960$                                                                        | $R^2 = 0.9681$                                                                        |
| <b>1j</b> |    |    |    |    |    |
|           | $R^2 = 0.9857$                                                                      | $R^2 = 0.9974$                                                                      | $R^2 = 0.9647$                                                                        | $R^2 = 0.9845$                                                                        | $R^2 = 0.9580$                                                                        |
| <b>1k</b> |    |    |    |    |    |
|           | $R^2 = 0.9750$                                                                      | $R^2 = 0.9746$                                                                      | $R^2 = 0.9554$                                                                        | $R^2 = 0.9781$                                                                        | $R^2 = 0.9928$                                                                        |
| <b>1l</b> |   |   |   |   |   |
|           | $R^2 = 0.9910$                                                                      | $R^2 = 0.9849$                                                                      | $R^2 = 0.9864$                                                                        | $R^2 = 0.9671$                                                                        | $R^2 = 0.9798$                                                                        |
| <b>1m</b> |  |  |  |  |  |



|           |                                                                                    |                                                                                    |                                                                                     |                                                                                      |                                                                                      |
|-----------|------------------------------------------------------------------------------------|------------------------------------------------------------------------------------|-------------------------------------------------------------------------------------|--------------------------------------------------------------------------------------|--------------------------------------------------------------------------------------|
|           | $R^2 = 0.9947$                                                                     | $R^2 = 0.9900$                                                                     | $R^2 = 0.9844$                                                                      | $R^2 = 0.9860$                                                                       | $R^2 = 0.9921$                                                                       |
| <b>1n</b> | 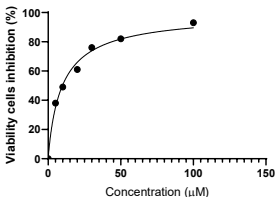  |   |   |   |   |
|           | $R^2 = 0.9912$                                                                     | $R^2 = 0.9932$                                                                     | $R^2 = 0.9898$                                                                      | $R^2 = 0.9852$                                                                       | $R^2 = 0.9809$                                                                       |
| <b>1o</b> |   |   |   |   |   |
|           | $R^2 = 0.9657$                                                                     | $R^2 = 0.9752$                                                                     | $R^2 = 0.9663$                                                                      | $R^2 = 0.9731$                                                                       | $R^2 = 0.9829$                                                                       |
| <b>1p</b> |   |   |   |   |   |
|           | $R^2 = 0.9968$                                                                     | $R^2 = 0.9836$                                                                     | $R^2 = 0.9748$                                                                      | $R^2 = 0.9701$                                                                       | $R^2 = 0.9836$                                                                       |
| <b>1q</b> |  |  |  |  |  |
|           | $R^2 = 0.9862$                                                                     | $R^2 = 0.9931$                                                                     | $R^2 = 0.9630$                                                                      | $R^2 = 0.9713$                                                                       | $R^2 = 0.9906$                                                                       |

|    |                                                                                     |                                                                                     |                                                                                       |                                                                                       |                                                                                       |
|----|-------------------------------------------------------------------------------------|-------------------------------------------------------------------------------------|---------------------------------------------------------------------------------------|---------------------------------------------------------------------------------------|---------------------------------------------------------------------------------------|
| 2a | 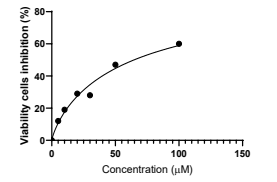   |    |    |    |    |
|    | $R^2 = 0.9775$                                                                      | $R^2 = 0.9819$                                                                      | $R^2 = 0.9908$                                                                        | $R^2 = 0.9940$                                                                        | $R^2 = 0.9631$                                                                        |
| 2b |    |    |    |    |    |
|    | $R^2 = 0.9447$                                                                      | $R^2 = 0.9883$                                                                      | $R^2 = 0.9600$                                                                        | $R^2 = 0.9896$                                                                        | $R^2 = 0.9833$                                                                        |
| 2c |    |    |    |    |    |
|    | $R^2 = 0.9931$                                                                      | $R^2 = 0.9839$                                                                      | $R^2 = 0.9568$                                                                        | $R^2 = 0.9260$                                                                        | $R^2 = 0.9864$                                                                        |
| 2d |   |   |   |   |   |
|    | $R^2 = 0.9787$                                                                      | $R^2 = 0.9628$                                                                      | $R^2 = 0.9883$                                                                        | $R^2 = 0.9870$                                                                        | $R^2 = 0.9900$                                                                        |
| 2e |  |  |  |  |  |

|           |                                                                                     |                                                                                     |                                                                                       |                                                                                       |                                                                                       |
|-----------|-------------------------------------------------------------------------------------|-------------------------------------------------------------------------------------|---------------------------------------------------------------------------------------|---------------------------------------------------------------------------------------|---------------------------------------------------------------------------------------|
|           | $R^2 = 0.9776$                                                                      | $R^2 = 0.9964$                                                                      | $R^2 = 0.9744$                                                                        | $R^2 = 0.9861$                                                                        | $R^2 = 0.9608$                                                                        |
| <b>2f</b> | 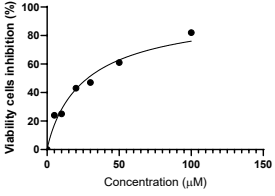   |    |    |    |    |
|           | $R^2 = 0.9735$                                                                      | $R^2 = 0.9786$                                                                      | $R^2 = 0.9890$                                                                        | $R^2 = 0.9967$                                                                        | $R^2 = 0.9775$                                                                        |
| <b>2g</b> |    |    |    |    |    |
|           | $R^2 = 0.9798$                                                                      | $R^2 = 0.9892$                                                                      | $R^2 = 0.9911$                                                                        | $R^2 = 0.9740$                                                                        | $R^2 = 0.9522$                                                                        |
| <b>2h</b> |    |    |    |    |    |
|           | $R^2 = 0.9732$                                                                      | $R^2 = 0.9702$                                                                      | $R^2 = 0.9738$                                                                        | $R^2 = 0.9699$                                                                        | $R^2 = 0.9527$                                                                        |
| <b>2i</b> |  |  |  |  |  |
|           | $R^2 = 0.9805$                                                                      | $R^2 = 0.9617$                                                                      | $R^2 = 0.9792$                                                                        | $R^2 = 0.9814$                                                                        | $R^2 = 0.9736$                                                                        |

|    |                                                                                     |                                                                                     |                                                                                       |                                                                                       |                                                                                       |
|----|-------------------------------------------------------------------------------------|-------------------------------------------------------------------------------------|---------------------------------------------------------------------------------------|---------------------------------------------------------------------------------------|---------------------------------------------------------------------------------------|
| 2j | 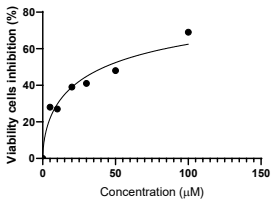   |    |    |    |    |
|    | $R^2 = 0.9550$                                                                      | $R^2 = 0.9802$                                                                      | $R^2 = 0.9690$                                                                        | $R^2 = 0.9653$                                                                        | $R^2 = 0.9718$                                                                        |
| 2k |    |    |    |    |    |
|    | $R^2 = 0.9575$                                                                      | $R^2 = 0.9801$                                                                      | $R^2 = 0.9652$                                                                        | $R^2 = 0.9456$                                                                        | $R^2 = 0.9731$                                                                        |
| 2l |    |    |    |    |    |
|    | $R^2 = 0.9890$                                                                      | $R^2 = 0.9751$                                                                      | $R^2 = 0.9726$                                                                        | $R^2 = 0.9550$                                                                        | $R^2 = 0.9667$                                                                        |
| 2m |   |   |   |   |   |
|    | $R^2 = 0.9818$                                                                      | $R^2 = 0.9919$                                                                      | $R^2 = 0.9971$                                                                        | $R^2 = 0.9906$                                                                        | $R^2 = 0.9874$                                                                        |
| 2n |  |  |  |  |  |

|           |                |                |                |                |                |
|-----------|----------------|----------------|----------------|----------------|----------------|
|           | $R^2 = 0.9913$ | $R^2 = 0.9903$ | $R^2 = 0.9859$ | $R^2 = 0.9933$ | $R^2 = 0.9806$ |
| <b>2o</b> |                |                |                |                |                |
|           | $R^2 = 0.9663$ | $R^2 = 0.9821$ | $R^2 = 0.9831$ | $R^2 = 0.9772$ | $R^2 = 0.9862$ |
| <b>2p</b> |                |                |                |                |                |
|           | $R^2 = 0.9952$ | $R^2 = 0.9493$ | $R^2 = 0.9814$ | $R^2 = 0.9943$ | $R^2 = 0.9827$ |
| <b>2q</b> |                |                |                |                |                |
|           | $R^2 = 0.9713$ | $R^2 = 0.9977$ | $R^2 = 0.9738$ | $R^2 = 0.9810$ | $R^2 = 0.9865$ |
| <b>3a</b> |                |                |                |                |                |
|           | $R^2 = 0.9450$ | $R^2 = 0.9885$ | $R^2 = 0.9585$ | $R^2 = 0.9743$ | $R^2 = 0.9865$ |

|           |                                                                                     |                                                                                     |                                                                                       |                                                                                       |                                                                                       |
|-----------|-------------------------------------------------------------------------------------|-------------------------------------------------------------------------------------|---------------------------------------------------------------------------------------|---------------------------------------------------------------------------------------|---------------------------------------------------------------------------------------|
| <b>3b</b> | 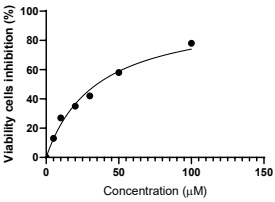   |    |    |    |    |
|           | $R^2 = 0.9861$                                                                      | $R^2 = 0.9615$                                                                      | $R^2 = 0.9927$                                                                        | $R^2 = 0.9874$                                                                        | $R^2 = 0.9958$                                                                        |
| <b>3c</b> |    |    |    |    |    |
|           | $R^2 = 0.9804$                                                                      | $R^2 = 0.9752$                                                                      | $R^2 = 0.9834$                                                                        | $R^2 = 0.9695$                                                                        | $R^2 = 0.9905$                                                                        |
| <b>3d</b> |    |    |    |    |    |
|           | $R^2 = 0.9836$                                                                      | $R^2 = 0.9905$                                                                      | $R^2 = 0.9901$                                                                        | $R^2 = 0.9726$                                                                        | $R^2 = 0.9968$                                                                        |
| <b>3e</b> |   |   |   |   |   |
|           | $R^2 = 0.9779$                                                                      | $R^2 = 0.9909$                                                                      | $R^2 = 0.9789$                                                                        | $R^2 = 0.9726$                                                                        | $R^2 = 0.9740$                                                                        |
| <b>3f</b> |  |  |  |  |  |

|           |                                                                                     |                                                                                     |                                                                                       |                                                                                       |                                                                                       |
|-----------|-------------------------------------------------------------------------------------|-------------------------------------------------------------------------------------|---------------------------------------------------------------------------------------|---------------------------------------------------------------------------------------|---------------------------------------------------------------------------------------|
|           | $R^2 = 0.98874$                                                                     | $R^2 = 0.9868$                                                                      | $R^2 = 0.9809$                                                                        | $R^2 = 0.9941$                                                                        | $R^2 = 0.9861$                                                                        |
| <b>3g</b> | 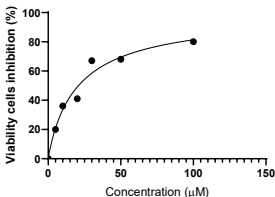   |    |    |    |    |
|           | $R^2 = 0.9702$                                                                      | $R^2 = 0.9421$                                                                      | $R^2 = 0.9823$                                                                        | $R^2 = 0.9839$                                                                        | $R^2 = 0.9904$                                                                        |
| <b>3h</b> |    |    |    |    |    |
|           | $R^2 = 0.9789$                                                                      | $R^2 = 0.9816$                                                                      | $R^2 = 0.9761$                                                                        | $R^2 = 0.9767$                                                                        | $R^2 = 0.9724$                                                                        |
| <b>3i</b> |    |    |    |    |    |
|           | $R^2 = 0.9990$                                                                      | $R^2 = 0.9874$                                                                      | $R^2 = 0.9928$                                                                        | $R^2 = 0.9907$                                                                        | $R^2 = 0.9858$                                                                        |
| <b>3j</b> |  |  |  |  |  |
|           | $R^2 = 0.9759$                                                                      | $R^2 = 0.9721$                                                                      | $R^2 = 0.9847$                                                                        | $R^2 = 0.9872$                                                                        | $R^2 = 0.9557$                                                                        |

|    |                                                                                     |                                                                                     |                                                                                       |                                                                                       |                                                                                       |
|----|-------------------------------------------------------------------------------------|-------------------------------------------------------------------------------------|---------------------------------------------------------------------------------------|---------------------------------------------------------------------------------------|---------------------------------------------------------------------------------------|
| 3k | 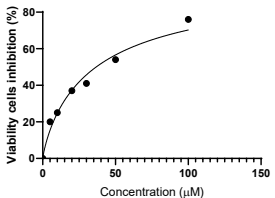   |    |    |    |    |
|    | $R^2 = 0.9769$                                                                      | $R^2 = 0.9820$                                                                      | $R^2 = 0.9926$                                                                        | $R^2 = 0.9803$                                                                        | $R^2 = 0.9896$                                                                        |
| 3l |    |    |    |    |    |
|    | $R^2 = 0.9919$                                                                      | $R^2 = 0.9895$                                                                      | $R^2 = 0.9671$                                                                        | $R^2 = 0.9847$                                                                        | $R^2 = 0.9748$                                                                        |
| 3m |    |    |    |    |    |
|    | $R^2 = 0.9836$                                                                      | $R^2 = 0.9782$                                                                      | $R^2 = 0.9601$                                                                        | $R^2 = 0.9851$                                                                        | $R^2 = 0.9403$                                                                        |
| 3n |   |   |   |   |   |
|    | $R^2 = 0.9246$                                                                      | $R^2 = 0.9802$                                                                      | $R^2 = 0.9220$                                                                        | $R^2 = 0.9956$                                                                        | $R^2 = 0.9856$                                                                        |
| 3o |  |  |  |  |  |



|           |                                                                                     |                                                                                     |                                                                                       |                                                                                       |                                                                                       |
|-----------|-------------------------------------------------------------------------------------|-------------------------------------------------------------------------------------|---------------------------------------------------------------------------------------|---------------------------------------------------------------------------------------|---------------------------------------------------------------------------------------|
|           | $R^2 = 0.9792$                                                                      | $R^2 = 0.9408$                                                                      | $R^2 = 0.9620$                                                                        | $R^2 = 0.9615$                                                                        | $R^2 = 0.9666$                                                                        |
| <b>3p</b> | 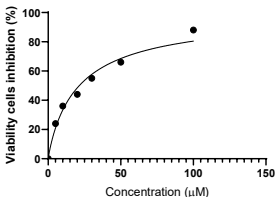   |    |    |    |    |
|           | $R^2 = 0.9781$                                                                      | $R^2 = 0.9590$                                                                      | $R^2 = 0.9891$                                                                        | $R^2 = 0.9860$                                                                        | $R^2 = 0.9840$                                                                        |
| <b>3q</b> |    |    |    |    |    |
|           | $R^2 = 0.9880$                                                                      | $R^2 = 0.9737$                                                                      | $R^2 = 0.9825$                                                                        | $R^2 = 0.9697$                                                                        | $R^2 = 0.9828$                                                                        |
| <b>3r</b> |    |    |    |    |    |
|           | $R^2 = 0.9925$                                                                      | $R^2 = 0.9837$                                                                      | $R^2 = 0.9645$                                                                        | $R^2 = 0.9940$                                                                        | $R^2 = 0.9878$                                                                        |
| <b>3s</b> |  |  |  |  |  |
|           | $R^2 = 0.9800$                                                                      | $R^2 = 0.9862$                                                                      | $R^2 = 0.9925$                                                                        | $R^2 = 0.9786$                                                                        | $R^2 = 0.9821$                                                                        |

|    |                                                                                     |                                                                                     |                                                                                       |                                                                                       |                                                                                       |
|----|-------------------------------------------------------------------------------------|-------------------------------------------------------------------------------------|---------------------------------------------------------------------------------------|---------------------------------------------------------------------------------------|---------------------------------------------------------------------------------------|
| 3t | 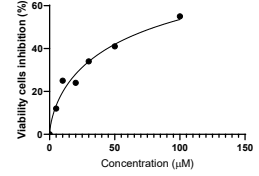   |    |    |    |    |
|    | $R^2 = 0.9750$                                                                      | $R^2 = 0.9744$                                                                      | $R^2 = 0.9769$                                                                        | $R^2 = 0.9877$                                                                        | $R^2 = 0.9774$                                                                        |
| 3u |    |    |    |    |    |
|    | $R^2 = 0.9728$                                                                      | $R^2 = 0.9913$                                                                      | $R^2 = 0.9832$                                                                        | $R^2 = 0.9943$                                                                        | $R^2 = 0.9842$                                                                        |
| 3v |    |    |    |    |    |
|    | $R^2 = 0.9843$                                                                      | $R^2 = 0.9647$                                                                      | $R^2 = 0.9802$                                                                        | $R^2 = 0.9466$                                                                        | $R^2 = 0.9550$                                                                        |
| 3w |   |   |   |   |   |
|    | $R^2 = 0.9764$                                                                      | $R^2 = 0.9630$                                                                      | $R^2 = 0.9827$                                                                        | $R^2 = 0.9852$                                                                        | $R^2 = 0.9682$                                                                        |
| 3x |  |  |  |  |  |
|    | $R^2 = 0.9764$                                                                      | $R^2 = 0.9630$                                                                      | $R^2 = 0.9827$                                                                        | $R^2 = 0.9852$                                                                        | $R^2 = 0.9682$                                                                        |

|           |                                                                                     |                                                                                     |                                                                                       |                                                                                       |                                                                                       |
|-----------|-------------------------------------------------------------------------------------|-------------------------------------------------------------------------------------|---------------------------------------------------------------------------------------|---------------------------------------------------------------------------------------|---------------------------------------------------------------------------------------|
|           | $R^2 = 0.9719$                                                                      | $R^2 = 0.9733$                                                                      | $R^2 = 0.9765$                                                                        | $R^2 = 0.9760$                                                                        | $R^2 = 0.9901$                                                                        |
| <b>4a</b> | 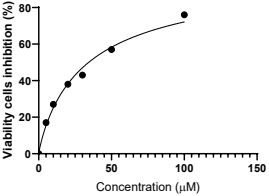   |    |    |    |    |
|           | $R^2 = 0.9897$                                                                      | $R^2 = 0.9026$                                                                      | $R^2 = 0.9715$                                                                        | $R^2 = 0.9937$                                                                        | $R^2 = 0.9738$                                                                        |
| <b>4b</b> |    |    |    |    |    |
|           | $R^2 = 0.9949$                                                                      | $R^2 = 0.9945$                                                                      | $R^2 = 0.9910$                                                                        | $R^2 = 0.9973$                                                                        | $R^2 = 0.9805$                                                                        |
| <b>4c</b> |    |    |    |    |    |
|           | $R^2 = 0.9971$                                                                      | $R^2 = 0.9349$                                                                      | $R^2 = 0.9940$                                                                        | $R^2 = 0.9852$                                                                        | $R^2 = 0.9892$                                                                        |
| <b>4d</b> |  |  |  |  |  |
|           | $R^2 = 0.9829$                                                                      | $R^2 = 0.9875$                                                                      | $R^2 = 0.9847$                                                                        | $R^2 = 0.9825$                                                                        | $R^2 = 0.9838$                                                                        |

|    |                                                                                     |                                                                                     |                                                                                       |                                                                                       |                                                                                       |
|----|-------------------------------------------------------------------------------------|-------------------------------------------------------------------------------------|---------------------------------------------------------------------------------------|---------------------------------------------------------------------------------------|---------------------------------------------------------------------------------------|
| 4e | 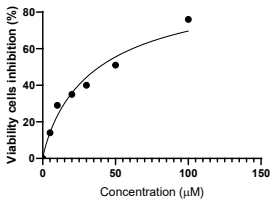   |    |    |    |    |
|    | $R^2 = 0.9692$                                                                      | $R^2 = 0.9641$                                                                      | $R^2 = 0.9895$                                                                        | $R^2 = 0.9637$                                                                        | $R^2 = 0.9969$                                                                        |
| 4f |    |    |    |    |    |
|    | $R^2 = 0.9885$                                                                      | $R^2 = 0.9772$                                                                      | $R^2 = 0.9668$                                                                        | $R^2 = 0.9867$                                                                        | $R^2 = 0.9759$                                                                        |
| 4g |    |    |    |    |    |
|    | $R^2 = 0.9878$                                                                      | $R^2 = 0.9850$                                                                      | $R^2 = 0.9883$                                                                        | $R^2 = 0.9899$                                                                        | $R^2 = 0.9801$                                                                        |
| 4h |   |   |   |   |   |
|    | $R^2 = 0.9743$                                                                      | $R^2 = 0.9677$                                                                      | $R^2 = 0.9909$                                                                        | $R^2 = 0.9833$                                                                        | $R^2 = 0.9852$                                                                        |
| 4i |  |  |  |  |  |
|    | $R^2 = 0.9906$                                                                      | $R^2 = 0.9928$                                                                      | $R^2 = 0.9758$                                                                        | $R^2 = 0.9803$                                                                        | $R^2 = 0.9777$                                                                        |

|    |                                                                                     |                                                                                     |                                                                                       |                                                                                       |                                                                                       |
|----|-------------------------------------------------------------------------------------|-------------------------------------------------------------------------------------|---------------------------------------------------------------------------------------|---------------------------------------------------------------------------------------|---------------------------------------------------------------------------------------|
| 4j | 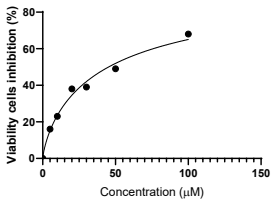   |    |    |    |    |
|    | $R^2 = 0.9869$                                                                      | $R^2 = 0.9885$                                                                      | $R^2 = 0.9650$                                                                        | $R^2 = 0.9348$                                                                        | $R^2 = 0.9863$                                                                        |
| 4k |    |    |    |    |    |
|    | $R^2 = 0.9860$                                                                      | $R^2 = 0.9961$                                                                      | $R^2 = 0.9955$                                                                        | $R^2 = 0.9880$                                                                        | $R^2 = 0.9917$                                                                        |
| 4l |    |    |    |    |    |
|    | $R^2 = 0.9864$                                                                      | $R^2 = 0.9750$                                                                      | $R^2 = 0.9111$                                                                        | $R^2 = 0.9885$                                                                        | $R^2 = 0.9743$                                                                        |
| 4m |   |   |   |   |   |
|    | $R^2 = 0.9573$                                                                      | $R^2 = 0.9766$                                                                      | $R^2 = 0.9705$                                                                        | $R^2 = 0.9932$                                                                        | $R^2 = 0.9925$                                                                        |
| 4n |  |  |  |  |  |
|    | $R^2 = 0.9832$                                                                      | $R^2 = 0.9653$                                                                      | $R^2 = 0.9636$                                                                        | $R^2 = 0.9787$                                                                        | $R^2 = 0.9781$                                                                        |

|     |                                                                                     |                                                                                     |                                                                                       |                                                                                       |                                                                                       |
|-----|-------------------------------------------------------------------------------------|-------------------------------------------------------------------------------------|---------------------------------------------------------------------------------------|---------------------------------------------------------------------------------------|---------------------------------------------------------------------------------------|
| 4o  | 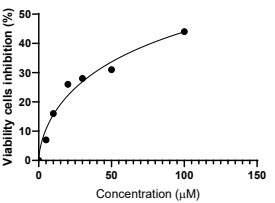   |    |    |    |    |
|     | $R^2 = 0.9733$                                                                      | $R^2 = 0.9827$                                                                      | $R^2 = 0.9843$                                                                        | $R^2 = 0.9698$                                                                        | $R^2 = 0.9718$                                                                        |
| 4p  |    |    |    |    |    |
|     | $R^2 = 0.9902$                                                                      | $R^2 = 0.9871$                                                                      | $R^2 = 0.9885$                                                                        | $R^2 = 0.9831$                                                                        | $R^2 = 0.9753$                                                                        |
| 4q  |    |    |    |    |    |
|     | $R^2 = 0.9899$                                                                      | $R^2 = 0.9781$                                                                      | $R^2 = 0.9923$                                                                        | $R^2 = 0.9792$                                                                        | $R^2 = 0.9960$                                                                        |
| 4r  |   |   |   |   |   |
|     | $R^2 = 0.9619$                                                                      | $R^2 = 0.9832$                                                                      | $R^2 = 0.9624$                                                                        | $R^2 = 0.9823$                                                                        | $R^2 = 0.9955$                                                                        |
| PTX |  |  |  |  |  |
|     | $R^2 = 0.9946$                                                                      | $R^2 = 0.9969$                                                                      | $R^2 = 0.9906$                                                                        | $R^2 = 0.9838$                                                                        | $R^2 = 0.9827$                                                                        |

# COMPUTATIONAL DATA in Supplementary Information

## 1. Dihydrofolate Reductase – Bacteria (PDB: 3FYV)

Grid box volume – Autodock Vina

```
receptor = 3fyvDHFRB.pdbqt  
ligand = ligand.pdbqt
```

```
out = out.pdbqt
```

```
center_x = 23.972  
center_y = 17.083  
center_z = 41.528
```

```
size_x = 30  
size_y = 35  
size_z = 30
```

```
energy_range = 4  
exhaustiveness = 8
```

## 1.1. Compound 1d

```
#####  
# If you used AutoDock Vina in your work, please cite:      #  
#                                                            #  
# O. Trott, A. J. Olson,                                    #  
# AutoDock Vina: improving the speed and accuracy of docking #  
# with a new scoring function, efficient optimization and   #  
# multithreading, Journal of Computational Chemistry 31 (2010) #  
# 455-461                                                    #  
#                                                            #  
# DOI 10.1002/jcc.21334                                     #  
#                                                            #  
# Please see http://vina.scripps.edu for more information. #  
#####
```

WARNING: The search space volume > 27000 Angstrom<sup>3</sup> (See FAQ)

Detected 8 CPUs

Reading input ... done.

Setting up the scoring function ... done.

Analyzing the binding site ... done.

Using random seed: -263030504

Performing search ... done.

Refining results ... done.

| mode | affinity   | dist from best mode |           |
|------|------------|---------------------|-----------|
|      | (kcal/mol) | rmsd l.b.           | rmsd u.b. |
| 1    | -8.6       | 0.000               | 0.000     |
| 2    | -8.2       | 1.607               | 6.931     |
| 3    | -8.1       | 1.868               | 2.433     |
| 4    | -7.9       | 1.176               | 1.865     |
| 5    | -7.9       | 2.500               | 3.231     |
| 6    | -7.9       | 2.138               | 6.922     |
| 7    | -7.8       | 2.893               | 3.788     |
| 8    | -7.8       | 2.519               | 3.071     |
| 9    | -7.7       | 1.054               | 1.219     |

Writing output ... done.



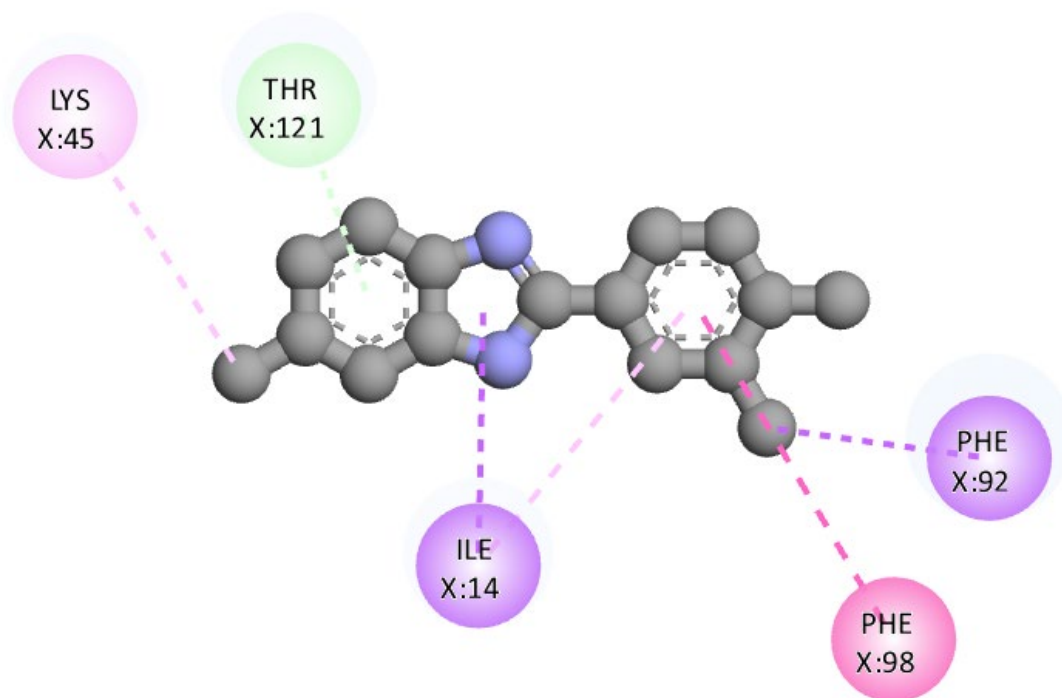

**Interactions**

- Pi-Donor Hydrogen Bond
- Pi-Sigma
- Pi-Pi T-shaped

- Alkyl
- Pi-Alkyl

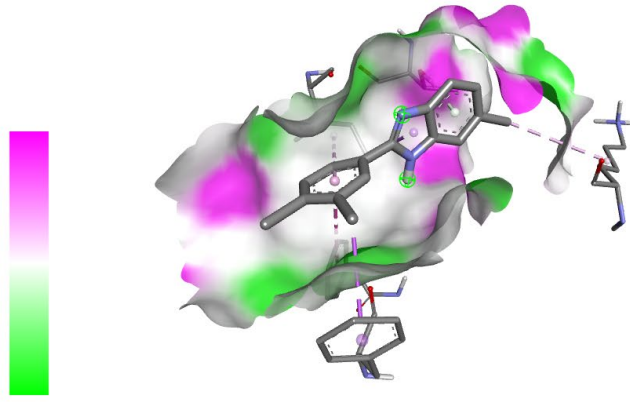

## 1.2. Compound 2d

```
#####  
# If you used AutoDock Vina in your work, please cite:      #  
#                                                            #  
# O. Trott, A. J. Olson,                                    #  
# AutoDock Vina: improving the speed and accuracy of docking #  
# with a new scoring function, efficient optimization and    #  
# multithreading, Journal of Computational Chemistry 31 (2010) #  
# 455-461                                                    #  
#                                                            #  
# DOI 10.1002/jcc.21334                                     #  
#                                                            #  
# Please see http://vina.scripps.edu for more information. #  
#####
```

WARNING: The search space volume > 27000 Angstrom<sup>3</sup> (See FAQ)

Detected 8 CPUs

Reading input ... done.

Setting up the scoring function ... done.

Analyzing the binding site ... done.

Using random seed: 747936400

Performing search ... done.

Refining results ... done.

| mode | affinity   | dist from best mode |           |
|------|------------|---------------------|-----------|
|      | (kcal/mol) | rmsd l.b.           | rmsd u.b. |
| 1    | -8.9       | 0.000               | 0.000     |
| 2    | -8.6       | 5.202               | 7.359     |
| 3    | -8.4       | 1.587               | 2.370     |
| 4    | -8.4       | 2.604               | 3.753     |
| 5    | -8.1       | 1.712               | 2.368     |
| 6    | -7.8       | 2.563               | 3.831     |
| 7    | -7.7       | 5.403               | 7.326     |
| 8    | -7.6       | 2.914               | 3.991     |
| 9    | -7.5       | 4.329               | 6.302     |

Writing output ... done.

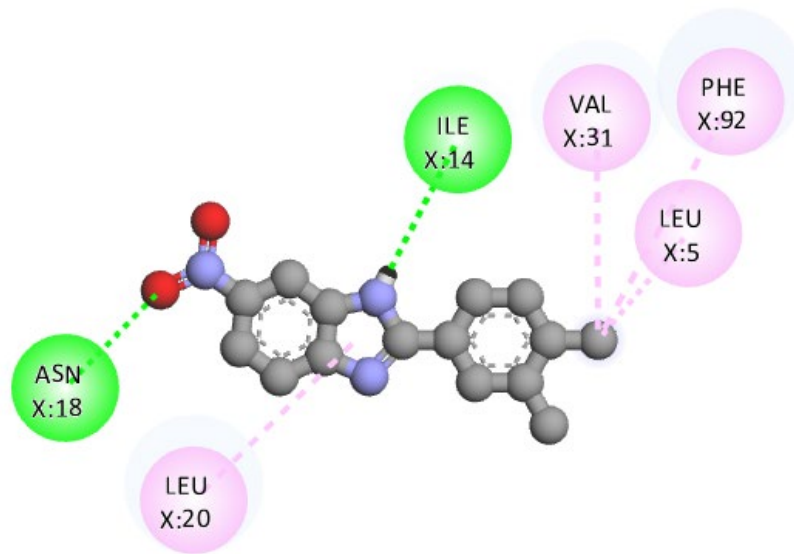

### Interactions

 Conventional Hydrogen Bond  
 Alkyl

 Pi-Alkyl

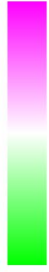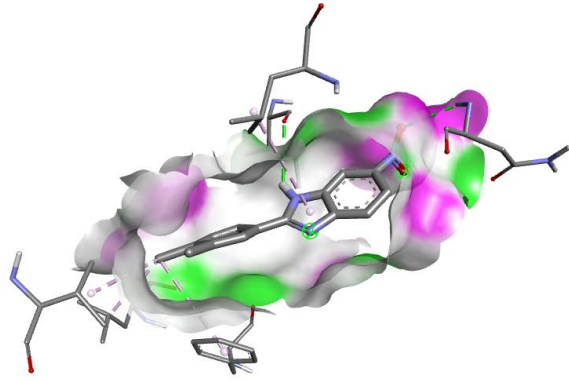

### 1.3. Compound 3s

```
#####  
# If you used AutoDock Vina in your work, please cite:      #  
#                                                            #  
# O. Trott, A. J. Olson,                                    #  
# AutoDock Vina: improving the speed and accuracy of docking #  
# with a new scoring function, efficient optimization and    #  
# multithreading, Journal of Computational Chemistry 31 (2010) #  
# 455-461                                                    #  
#                                                            #  
# DOI 10.1002/jcc.21334                                     #  
#                                                            #  
# Please see http://vina.scripps.edu for more information. #  
#####
```

```
WARNING: The search space volume > 27000 Angstrom^3 (See FAQ)  
Detected 8 CPUs  
Reading input ... done.  
Setting up the scoring function ... done.  
Analyzing the binding site ... done.  
Using random seed: 5130864  
Performing search ... done.  
Refining results ... done.
```

| mode | affinity   | dist from best mode |           |
|------|------------|---------------------|-----------|
|      | (kcal/mol) | rmsd l.b.           | rmsd u.b. |
| 1    | -9.2       | 0.000               | 0.000     |
| 2    | -8.9       | 3.035               | 6.464     |
| 3    | -8.6       | 3.237               | 7.180     |
| 4    | -8.5       | 1.839               | 2.883     |
| 5    | -8.5       | 1.492               | 2.223     |
| 6    | -8.3       | 3.051               | 7.556     |
| 7    | -8.1       | 1.753               | 4.082     |
| 8    | -8.1       | 1.889               | 4.167     |
| 9    | -8.1       | 2.962               | 6.188     |

```
Writing output ... done.
```

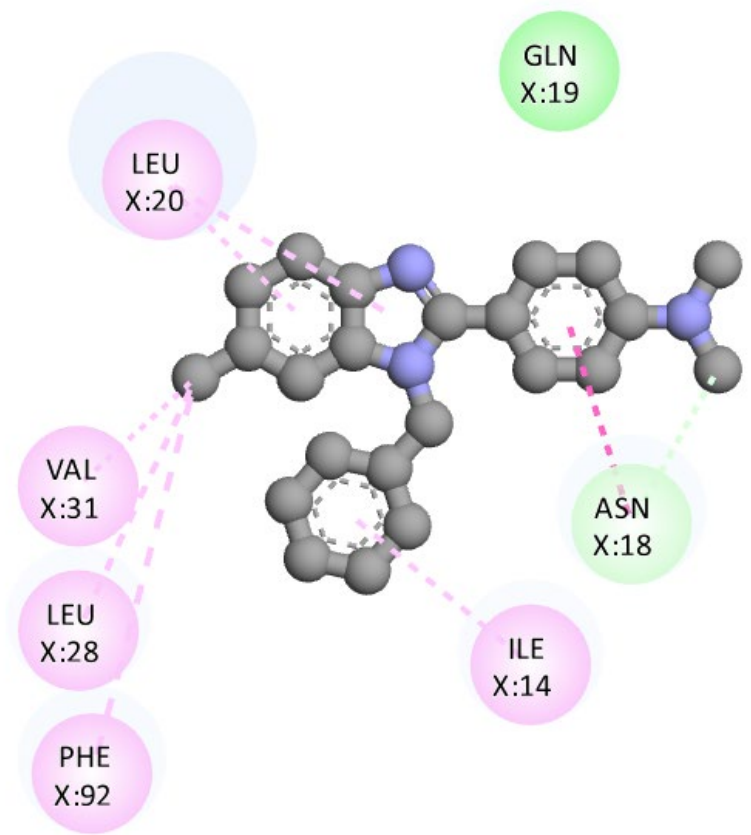

**Interactions**

- |                                                                                     |                      |                                                                                     |          |
|-------------------------------------------------------------------------------------|----------------------|-------------------------------------------------------------------------------------|----------|
|  | van der Waals        |  | Alkyl    |
|  | Carbon Hydrogen Bond |  | Pi-Alkyl |
|  | Amide-Pi Stacked     |                                                                                     |          |

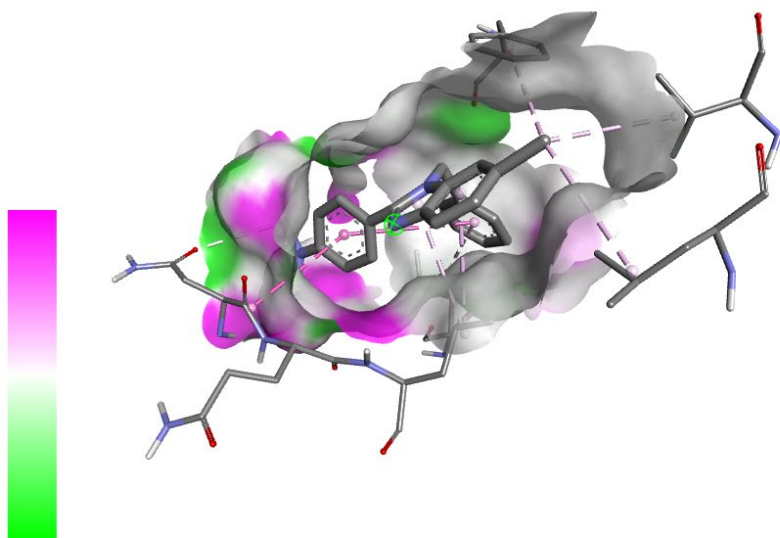



#### 1.4. Compound 4b

```
#####  
# If you used AutoDock Vina in your work, please cite:      #  
#                                                            #  
# O. Trott, A. J. Olson,                                     #  
# AutoDock Vina: improving the speed and accuracy of docking #  
# with a new scoring function, efficient optimization and    #  
# multithreading, Journal of Computational Chemistry 31 (2010) #  
# 455-461                                                    #  
#                                                            #  
# DOI 10.1002/jcc.21334                                     #  
#                                                            #  
# Please see http://vina.scripps.edu for more information. #  
#####
```

```
WARNING: The search space volume > 27000 Angstrom^3 (See FAQ)  
Detected 8 CPUs  
Reading input ... done.  
Setting up the scoring function ... done.  
Analyzing the binding site ... done.  
Using random seed: -1301333348  
Performing search ... done.  
Refining results ... done.
```

| mode | affinity<br>(kcal/mol) | dist from best mode |           |
|------|------------------------|---------------------|-----------|
|      |                        | rmsd l.b.           | rmsd u.b. |
| 1    | -9.2                   | 0.000               | 0.000     |
| 2    | -8.9                   | 5.034               | 7.433     |
| 3    | -8.5                   | 1.970               | 3.156     |
| 4    | -8.4                   | 4.722               | 6.904     |
| 5    | -8.4                   | 1.170               | 1.630     |
| 6    | -8.3                   | 1.667               | 3.208     |
| 7    | -8.2                   | 1.929               | 3.168     |
| 8    | -8.2                   | 1.921               | 3.428     |
| 9    | -7.8                   | 2.440               | 4.093     |

```
Writing output ... done.
```

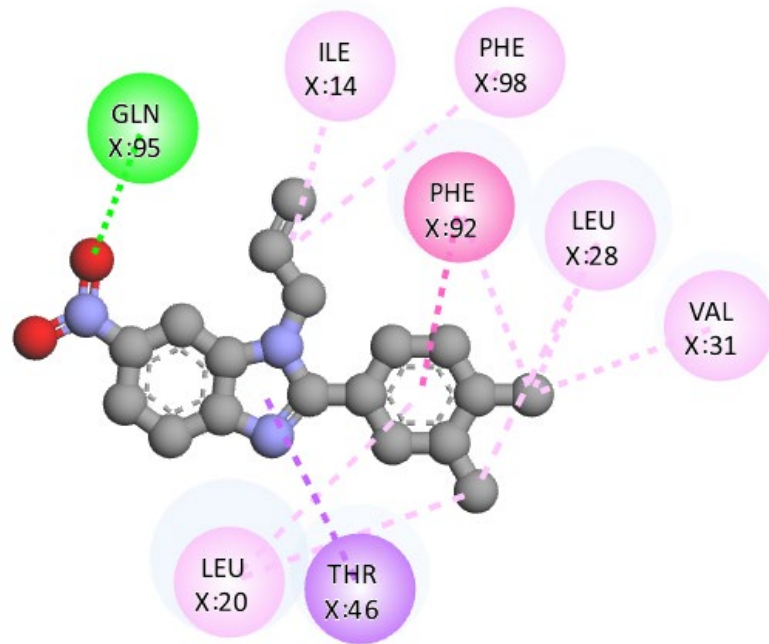

**Interactions**

|                                                                                     |                            |                                                                                     |          |
|-------------------------------------------------------------------------------------|----------------------------|-------------------------------------------------------------------------------------|----------|
|  | Conventional Hydrogen Bond |  | Alkyl    |
|  | Pi-Sigma                   |  | Pi-Alkyl |
|  | Pi-Pi Stacked              |                                                                                     |          |

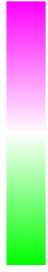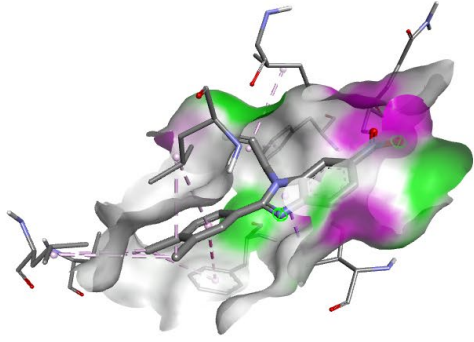

## 1.5. Compound 4k

```
#####  
# If you used AutoDock Vina in your work, please cite:      #  
#                                                            #  
# O. Trott, A. J. Olson,                                     #  
# AutoDock Vina: improving the speed and accuracy of docking #  
# with a new scoring function, efficient optimization and    #  
# multithreading, Journal of Computational Chemistry 31 (2010) #  
# 455-461                                                    #  
#                                                            #  
# DOI 10.1002/jcc.21334                                     #  
#                                                            #  
# Please see http://vina.scripps.edu for more information. #  
#####
```

```
WARNING: The search space volume > 27000 Angstrom^3 (See FAQ)  
Detected 8 CPUs  
Reading input ... done.  
Setting up the scoring function ... done.  
Analyzing the binding site ... done.  
Using random seed: -70295152  
Performing search ... done.  
Refining results ... done.
```

| mode | affinity<br>(kcal/mol) | dist from best mode<br>rmsd l.b. | rmsd u.b. |
|------|------------------------|----------------------------------|-----------|
| 1    | -9.4                   | 0.000                            | 0.000     |
| 2    | -9.3                   | 4.240                            | 8.642     |
| 3    | -9.1                   | 3.214                            | 5.404     |
| 4    | -9.0                   | 3.160                            | 6.906     |
| 5    | -8.8                   | 3.328                            | 6.857     |
| 6    | -8.6                   | 3.783                            | 7.838     |
| 7    | -8.5                   | 3.794                            | 7.588     |
| 8    | -8.3                   | 6.298                            | 8.877     |
| 9    | -8.3                   | 6.358                            | 8.899     |

```
Writing output ... done.
```

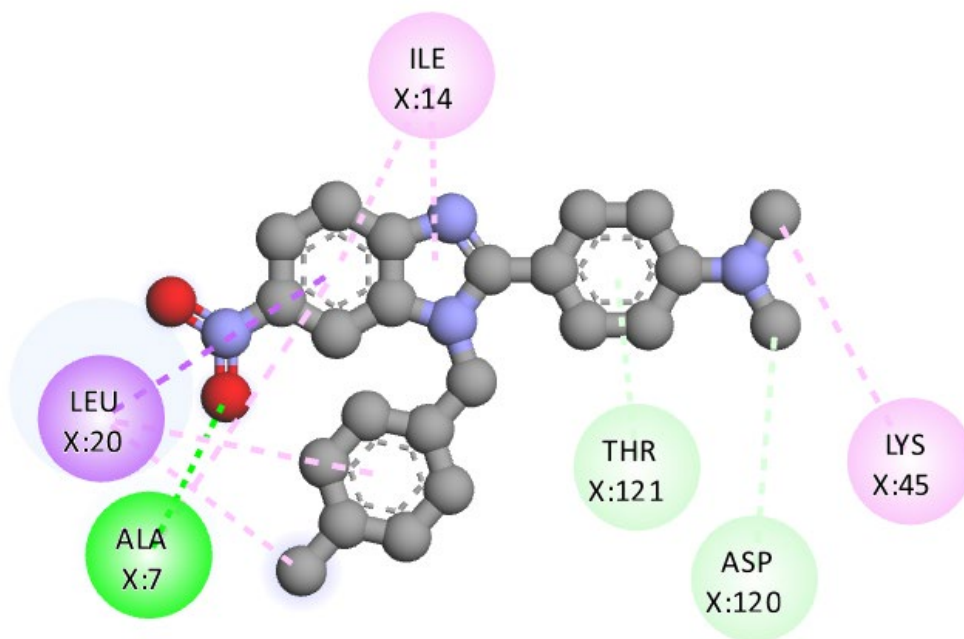

**Interactions**

|                                                                                     |                            |                                                                                     |          |
|-------------------------------------------------------------------------------------|----------------------------|-------------------------------------------------------------------------------------|----------|
|  | Conventional Hydrogen Bond |  | Pi-Sigma |
|  | Carbon Hydrogen Bond       |  | Alkyl    |
|  | Pi-Donor Hydrogen Bond     |  | Pi-Alkyl |

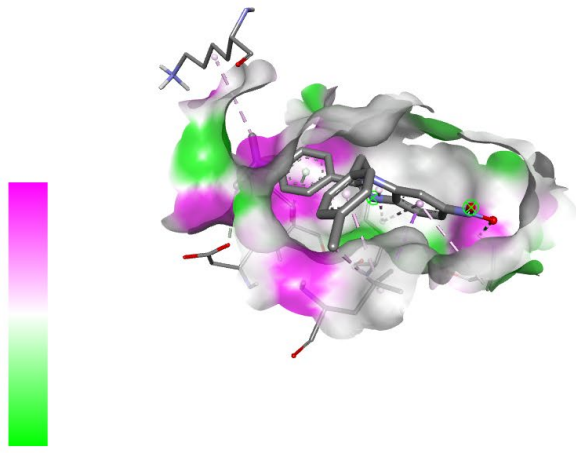

## 1.6. Compound Cipro

```
#####  
# If you used AutoDock Vina in your work, please cite:      #  
#                                                            #  
# O. Trott, A. J. Olson,                                    #  
# AutoDock Vina: improving the speed and accuracy of docking #  
# with a new scoring function, efficient optimization and    #  
# multithreading, Journal of Computational Chemistry 31 (2010) #  
# 455-461                                                    #  
#                                                            #  
# DOI 10.1002/jcc.21334                                     #  
#                                                            #  
# Please see http://vina.scripps.edu for more information. #  
#####
```

```
WARNING: The search space volume > 27000 Angstrom^3 (See FAQ)  
Detected 8 CPUs  
Reading input ... done.  
Setting up the scoring function ... done.  
Analyzing the binding site ... done.  
Using random seed: -215246968  
Performing search ... done.  
Refining results ... done.
```

| mode | affinity<br>(kcal/mol) | dist from best mode<br>rmsd l.b. | rmsd u.b. |
|------|------------------------|----------------------------------|-----------|
| 1    | -9.1                   | 0.000                            | 0.000     |
| 2    | -8.7                   | 3.423                            | 6.648     |
| 3    | -8.6                   | 3.981                            | 7.327     |
| 4    | -8.4                   | 3.575                            | 6.566     |
| 5    | -8.1                   | 2.874                            | 4.619     |
| 6    | -8.0                   | 4.052                            | 5.964     |
| 7    | -7.8                   | 4.025                            | 7.178     |
| 8    | -7.7                   | 8.845                            | 12.410    |
| 9    | -7.6                   | 3.533                            | 6.043     |

```
Writing output ... done.
```

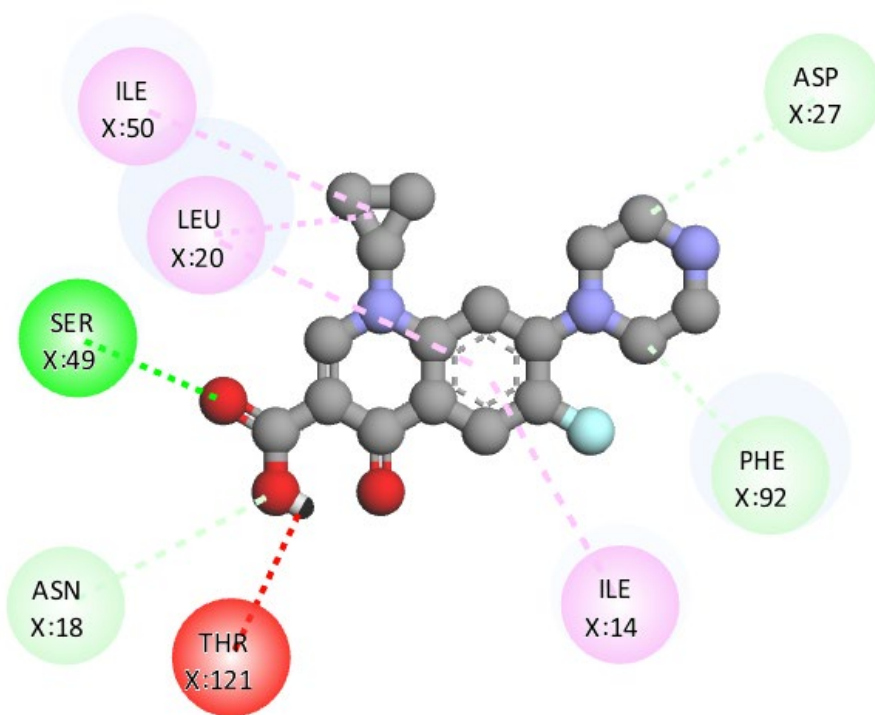

### Interactions

|                                                                                     |                            |
|-------------------------------------------------------------------------------------|----------------------------|
|  | Conventional Hydrogen Bond |
|  | Carbon Hydrogen Bond       |
|  | Unfavorable Donor-Donor    |

|                                                                                     |          |
|-------------------------------------------------------------------------------------|----------|
|  | Alkyl    |
|  | Pi-Alkyl |



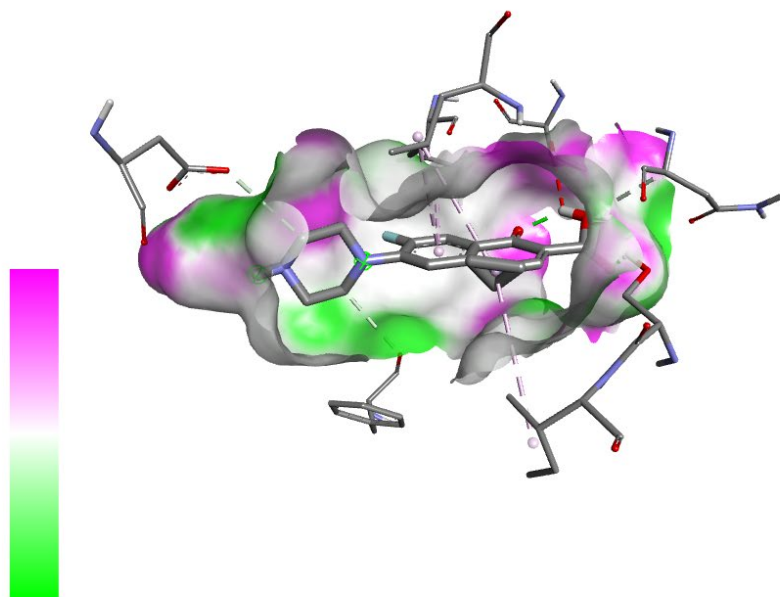

## 1.7. Compound PTX

```
#####  
# If you used AutoDock Vina in your work, please cite:      #  
#                                                            #  
# O. Trott, A. J. Olson,                                     #  
# AutoDock Vina: improving the speed and accuracy of docking #  
# with a new scoring function, efficient optimization and    #  
# multithreading, Journal of Computational Chemistry 31 (2010) #  
# 455-461                                                    #  
#                                                            #  
# DOI 10.1002/jcc.21334                                     #  
#                                                            #  
# Please see http://vina.scripps.edu for more information. #  
#####
```

WARNING: The search space volume > 27000 Angstrom<sup>3</sup> (See FAQ)

Detected 8 CPUs

Reading input ... done.

Setting up the scoring function ... done.

Analyzing the binding site ... done.

Using random seed: -2051321328

Performing search ... done.

Refining results ... done.

| mode | affinity   | dist from best mode |           |
|------|------------|---------------------|-----------|
|      | (kcal/mol) | rmsd l.b.           | rmsd u.b. |
| 1    | -10.0      | 0.000               | 0.000     |
| 2    | -8.1       | 1.596               | 5.444     |
| 3    | -8.1       | 0.944               | 3.622     |
| 4    | -8.0       | 10.018              | 18.422    |
| 5    | -7.6       | 10.188              | 17.799    |
| 6    | -7.5       | 8.739               | 18.280    |
| 7    | -7.3       | 2.112               | 5.745     |
| 8    | -7.2       | 10.636              | 19.300    |
| 9    | -7.1       | 2.459               | 7.199     |

Writing output ... done.

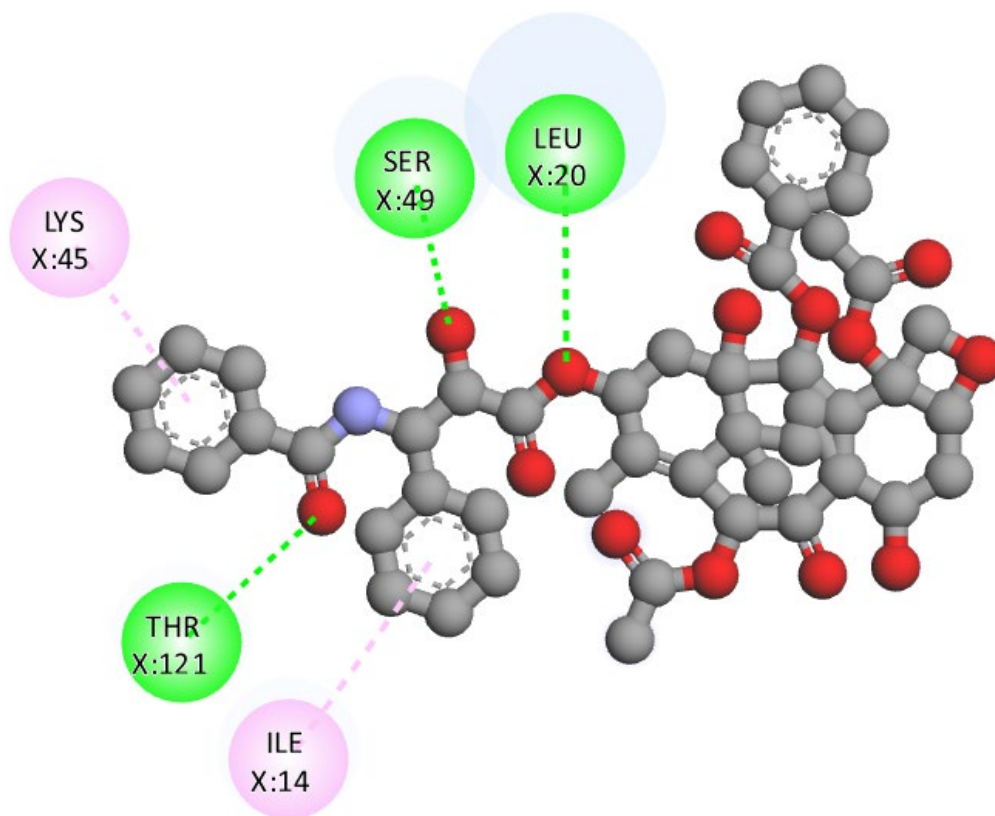

**Interactions**

 Conventional Hydrogen Bond

 Pi-Alkyl

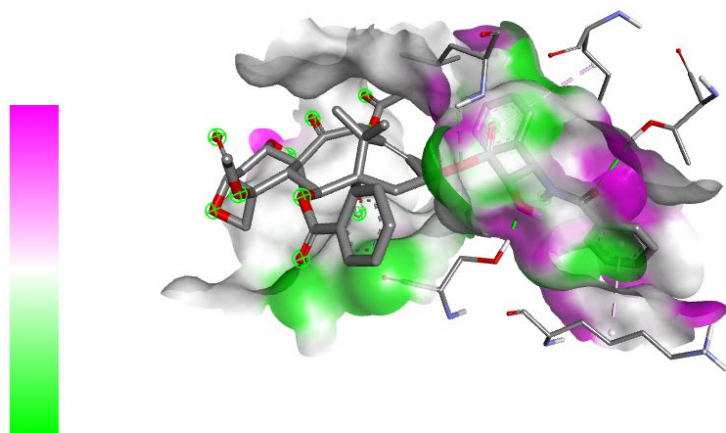

## 2. Gyrase B (PDB: 4URM)

Grid box volume – Autodock Vina

```
receptor = 4urmGyrB.pdbqt  
ligand = ligand.pdbqt
```

```
out = out.pdbqt
```

```
center_x = 23.9228  
center_y = 7.94566  
center_z = 90.4085
```

```
size_x = 30  
size_y = 30  
size_z = 30
```

```
energy_range = 4  
exhaustiveness = 8
```

## 2.1. Compound 1d

```
#####  
# If you used AutoDock Vina in your work, please cite:      #  
#                                                            #  
# O. Trott, A. J. Olson,                                    #  
# AutoDock Vina: improving the speed and accuracy of docking #  
# with a new scoring function, efficient optimization and    #  
# multithreading, Journal of Computational Chemistry 31 (2010) #  
# 455-461                                                    #  
#                                                            #  
# DOI 10.1002/jcc.21334                                     #  
#                                                            #  
# Please see http://vina.scripps.edu for more information. #  
#####
```

```
Detected 8 CPUs  
Reading input ... done.  
Setting up the scoring function ... done.  
Analyzing the binding site ... done.  
Using random seed: -1089847928  
Performing search ... done.  
Refining results ... done.
```

| mode | affinity<br>(kcal/mol) | dist from best mode |           |
|------|------------------------|---------------------|-----------|
|      |                        | rmsd l.b.           | rmsd u.b. |
| 1    | -7.4                   | 0.000               | 0.000     |
| 2    | -7.3                   | 3.005               | 7.402     |
| 3    | -7.3                   | 2.347               | 2.827     |
| 4    | -7.1                   | 2.833               | 7.108     |
| 5    | -6.8                   | 1.578               | 2.330     |
| 6    | -6.6                   | 1.216               | 6.697     |
| 7    | -6.6                   | 2.954               | 6.927     |
| 8    | -6.3                   | 3.078               | 3.788     |
| 9    | -6.1                   | 4.113               | 6.985     |

```
Writing output ... done.
```

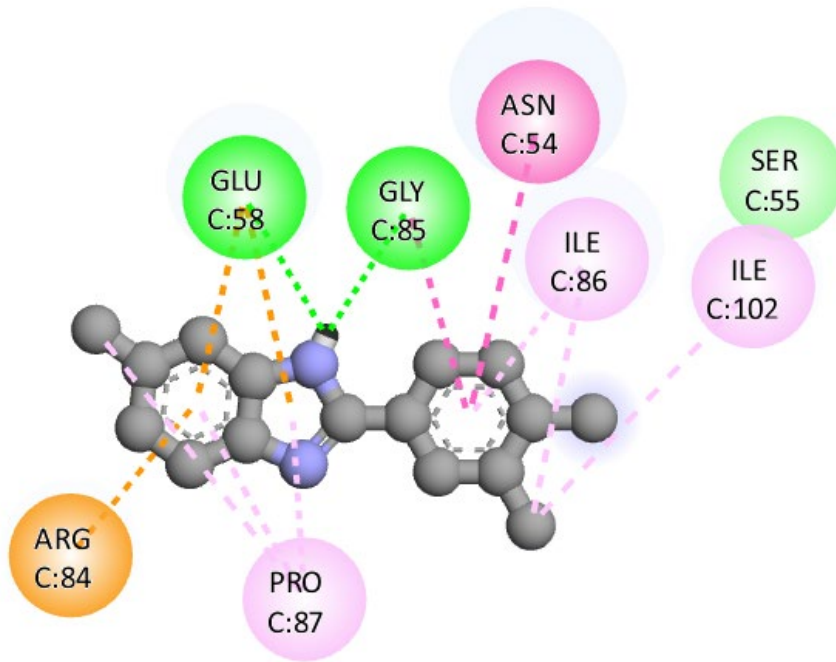

**Interactions**

|                                                                                     |                            |                                                                                     |                  |
|-------------------------------------------------------------------------------------|----------------------------|-------------------------------------------------------------------------------------|------------------|
|  | van der Waals              |  | Amide-Pi Stacked |
|  | Conventional Hydrogen Bond |  | Alkyl            |
|  | Pi-Cation                  |  | Pi-Alkyl         |
|  | Pi-Anion                   |                                                                                     |                  |

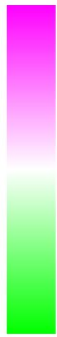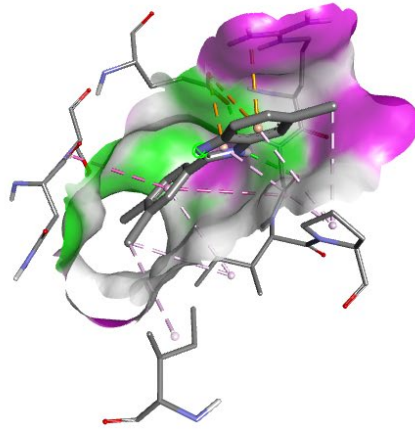



## 2.2. Compound 2d

```
#####  
# If you used AutoDock Vina in your work, please cite:      #  
#                                                            #  
# O. Trott, A. J. Olson,                                    #  
# AutoDock Vina: improving the speed and accuracy of docking #  
# with a new scoring function, efficient optimization and    #  
# multithreading, Journal of Computational Chemistry 31 (2010) #  
# 455-461                                                    #  
#                                                            #  
# DOI 10.1002/jcc.21334                                     #  
#                                                            #  
# Please see http://vina.scripps.edu for more information. #  
#####
```

```
Detected 8 CPUs  
Reading input ... done.  
Setting up the scoring function ... done.  
Analyzing the binding site ... done.  
Using random seed: 2056033640  
Performing search ... done.  
Refining results ... done.
```

| mode | affinity<br>(kcal/mol) | dist from best mode |           |
|------|------------------------|---------------------|-----------|
|      |                        | rmsd l.b.           | rmsd u.b. |
| 1    | -7.7                   | 0.000               | 0.000     |
| 2    | -7.6                   | 0.967               | 1.764     |
| 3    | -7.5                   | 5.220               | 7.566     |
| 4    | -7.4                   | 1.640               | 1.933     |
| 5    | -7.1                   | 5.342               | 7.520     |
| 6    | -7.0                   | 6.024               | 8.189     |
| 7    | -7.0                   | 5.472               | 7.790     |
| 8    | -6.9                   | 3.057               | 4.384     |
| 9    | -6.6                   | 2.525               | 3.339     |

```
Writing output ... done.
```

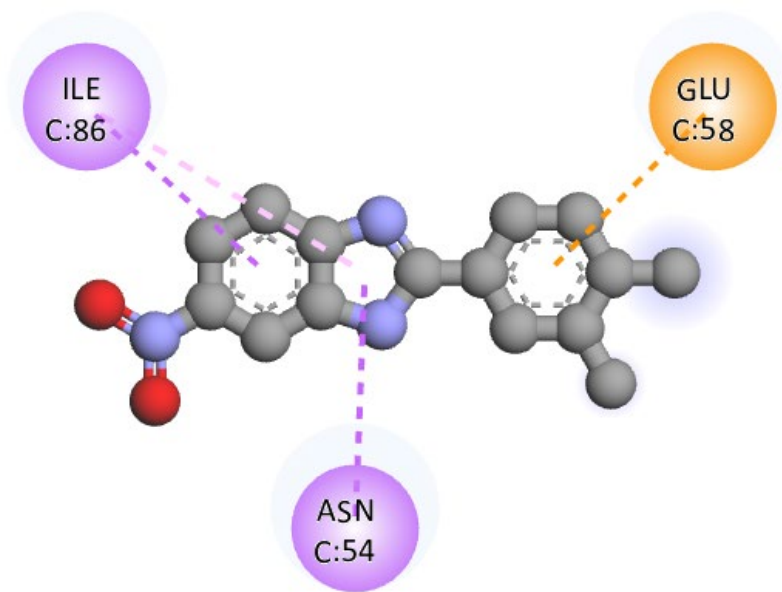

**Interactions**

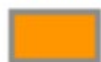

Pi-Anion

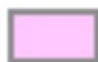

Pi-Alkyl

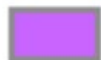

Pi-Sigma

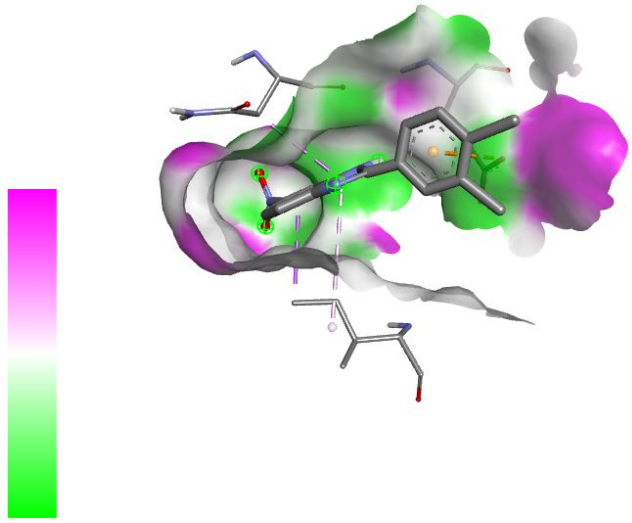

### 2.3. Compound 3s

```
#####  
# If you used AutoDock Vina in your work, please cite:      #  
#                                                            #  
# O. Trott, A. J. Olson,                                    #  
# AutoDock Vina: improving the speed and accuracy of docking #  
# with a new scoring function, efficient optimization and    #  
# multithreading, Journal of Computational Chemistry 31 (2010) #  
# 455-461                                                    #  
#                                                            #  
# DOI 10.1002/jcc.21334                                     #  
#                                                            #  
# Please see http://vina.scripps.edu for more information. #  
#####
```

```
Detected 8 CPUs  
Reading input ... done.  
Setting up the scoring function ... done.  
Analyzing the binding site ... done.  
Using random seed: 1999731128  
Performing search ... done.  
Refining results ... done.
```

| mode | affinity<br>(kcal/mol) | dist from best mode<br>rmsd l.b. | rmsd u.b. |
|------|------------------------|----------------------------------|-----------|
| 1    | -7.7                   | 0.000                            | 0.000     |
| 2    | -7.6                   | 3.401                            | 6.814     |
| 3    | -7.6                   | 2.838                            | 6.537     |
| 4    | -7.3                   | 1.341                            | 2.135     |
| 5    | -6.3                   | 3.091                            | 6.575     |
| 6    | -6.3                   | 3.173                            | 6.949     |
| 7    | -6.3                   | 2.183                            | 4.424     |
| 8    | -6.2                   | 4.086                            | 6.678     |
| 9    | -6.2                   | 13.111                           | 14.820    |

```
Writing output ... done.
```

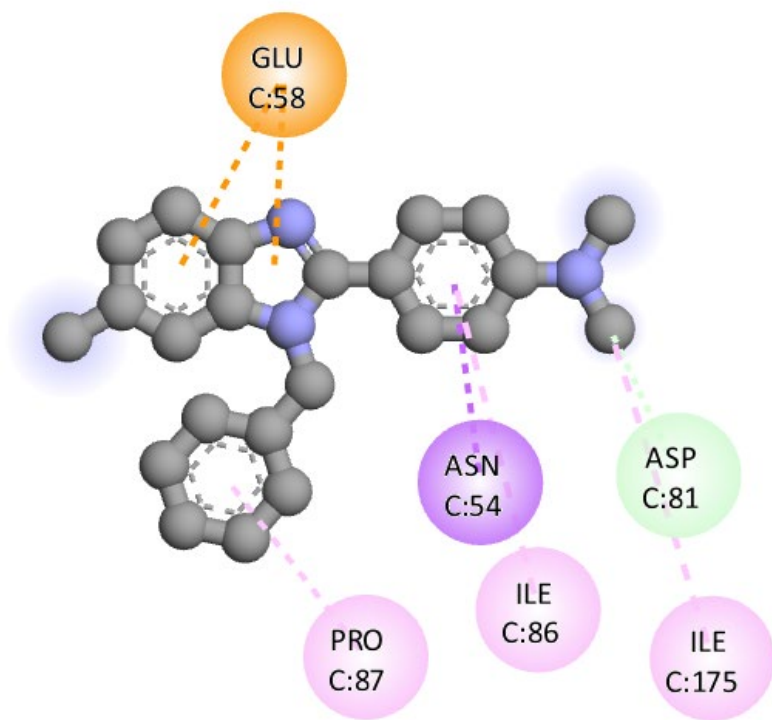

**Interactions**

-  Carbon Hydrogen Bond
-  Pi-Anion
-  Pi-Sigma

-  Alkyl
-  Pi-Alkyl

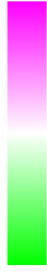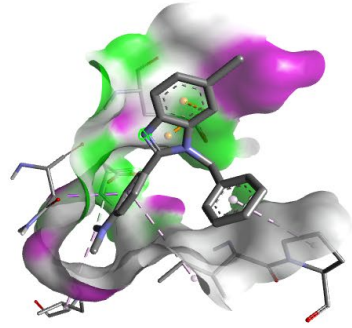

## 2.4. Compound 4b

```
#####  
# If you used AutoDock Vina in your work, please cite:      #  
#                                                            #  
# O. Trott, A. J. Olson,                                     #  
# AutoDock Vina: improving the speed and accuracy of docking #  
# with a new scoring function, efficient optimization and    #  
# multithreading, Journal of Computational Chemistry 31 (2010) #  
# 455-461                                                    #  
#                                                            #  
# DOI 10.1002/jcc.21334                                     #  
#                                                            #  
# Please see http://vina.scripps.edu for more information. #  
#####
```

Detected 8 CPUs

Reading input ... done.

Setting up the scoring function ... done.

Analyzing the binding site ... done.

Using random seed: -1394259368

Performing search ... done.

Refining results ... done.

| mode | affinity   | dist from best mode |           |
|------|------------|---------------------|-----------|
|      | (kcal/mol) | rmsd l.b.           | rmsd u.b. |
| 1    | -7.6       | 0.000               | 0.000     |
| 2    | -7.3       | 5.758               | 7.960     |
| 3    | -7.2       | 5.841               | 8.151     |
| 4    | -7.0       | 5.275               | 7.606     |
| 5    | -7.0       | 2.634               | 4.006     |
| 6    | -6.8       | 2.976               | 4.087     |
| 7    | -6.7       | 2.656               | 4.293     |
| 8    | -6.2       | 3.458               | 5.121     |
| 9    | -6.0       | 5.836               | 8.230     |

Writing output ... done.

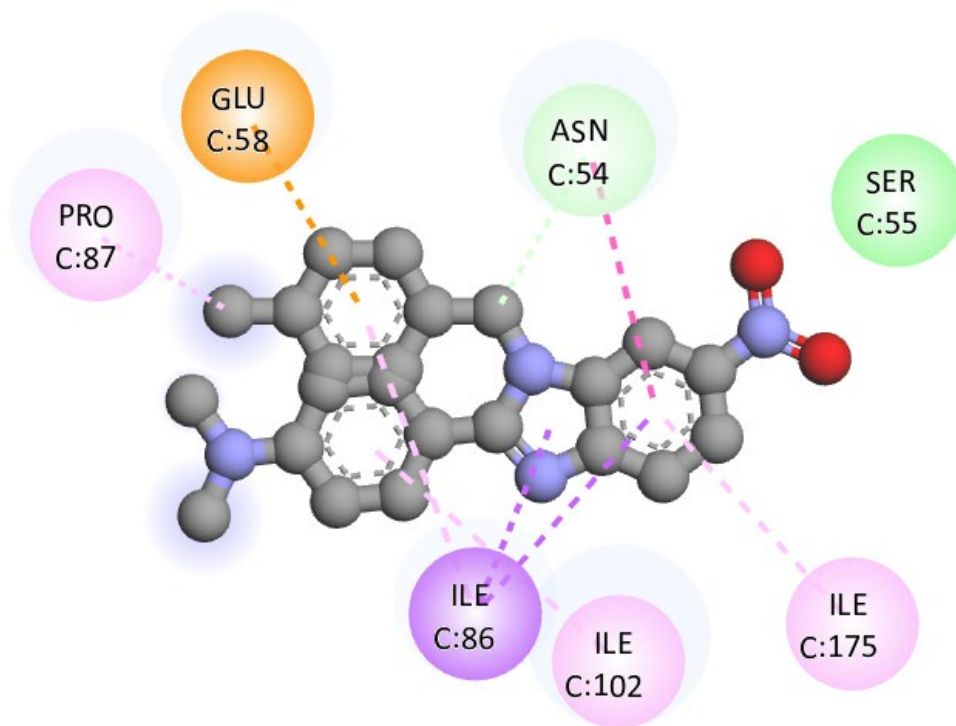

**Interactions**

|                                                                                     |                      |                                                                                     |                  |
|-------------------------------------------------------------------------------------|----------------------|-------------------------------------------------------------------------------------|------------------|
|  | van der Waals        |  | Amide-Pi Stacked |
|  | Carbon Hydrogen Bond |  | Alkyl            |
|  | Pi-Anion             |  | Pi-Alkyl         |
|  | Pi-Sigma             |                                                                                     |                  |



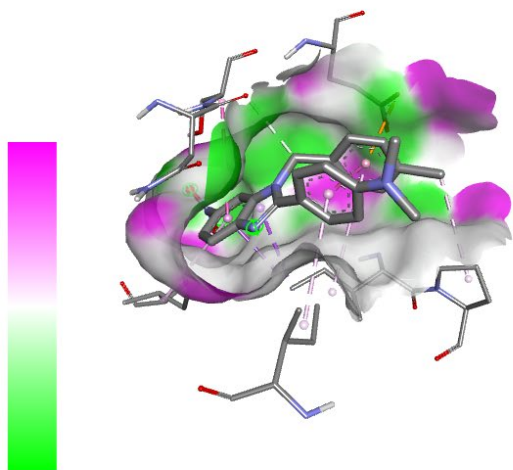

## 2.5. Compound 4k

```
#####  
# If you used AutoDock Vina in your work, please cite:      #  
#                                                            #  
# O. Trott, A. J. Olson,                                     #  
# AutoDock Vina: improving the speed and accuracy of docking #  
# with a new scoring function, efficient optimization and    #  
# multithreading, Journal of Computational Chemistry 31 (2010) #  
# 455-461                                                    #  
#                                                            #  
# DOI 10.1002/jcc.21334                                     #  
#                                                            #  
# Please see http://vina.scripps.edu for more information. #  
#####
```

```
Detected 8 CPUs  
Reading input ... done.  
Setting up the scoring function ... done.  
Analyzing the binding site ... done.  
Using random seed: -2026544880  
Performing search ... done.  
Refining results ... done.
```

| mode | affinity   | dist from best mode |           |
|------|------------|---------------------|-----------|
|      | (kcal/mol) | rmsd l.b.           | rmsd u.b. |
| 1    | -8.1       | 0.000               | 0.000     |
| 2    | -7.8       | 2.708               | 4.370     |
| 3    | -7.5       | 4.618               | 7.666     |
| 4    | -7.4       | 4.700               | 7.804     |
| 5    | -7.2       | 4.329               | 7.686     |
| 6    | -6.9       | 4.432               | 7.808     |
| 7    | -6.6       | 2.570               | 3.882     |
| 8    | -6.4       | 12.468              | 13.994    |
| 9    | -6.3       | 2.923               | 4.477     |

```
Writing output ... done.
```



**Interactions**

|                                                                                     |                      |                                                                                     |                  |
|-------------------------------------------------------------------------------------|----------------------|-------------------------------------------------------------------------------------|------------------|
|  | van der Waals        |  | Amide-Pi Stacked |
|  | Carbon Hydrogen Bond |  | Alkyl            |
|  | Pi-Anion             |  | Pi-Alkyl         |
|  | Pi-Sigma             |                                                                                     |                  |

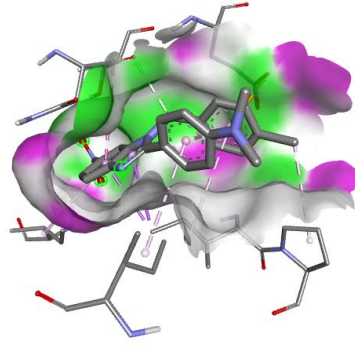

## 2.6. Compound Cipro

```
#####  
# If you used AutoDock Vina in your work, please cite:      #  
#                                                            #  
# O. Trott, A. J. Olson,                                     #  
# AutoDock Vina: improving the speed and accuracy of docking #  
# with a new scoring function, efficient optimization and    #  
# multithreading, Journal of Computational Chemistry 31 (2010) #  
# 455-461                                                    #  
#                                                            #  
# DOI 10.1002/jcc.21334                                     #  
#                                                            #  
# Please see http://vina.scripps.edu for more information. #  
#####
```

```
Detected 8 CPUs  
Reading input ... done.  
Setting up the scoring function ... done.  
Analyzing the binding site ... done.  
Using random seed: -260904248  
Performing search ... done.  
Refining results ... done.
```

| mode | affinity   | dist from best mode |           |
|------|------------|---------------------|-----------|
|      | (kcal/mol) | rmsd l.b.           | rmsd u.b. |
| 1    | -7.3       | 0.000               | 0.000     |
| 2    | -6.9       | 2.891               | 4.494     |
| 3    | -6.8       | 3.615               | 6.726     |
| 4    | -6.8       | 2.343               | 3.878     |
| 5    | -6.3       | 3.850               | 7.243     |
| 6    | -6.3       | 4.582               | 7.334     |
| 7    | -6.1       | 4.079               | 7.491     |
| 8    | -6.1       | 5.292               | 8.112     |
| 9    | -5.9       | 4.651               | 7.100     |

```
Writing output ... done.
```

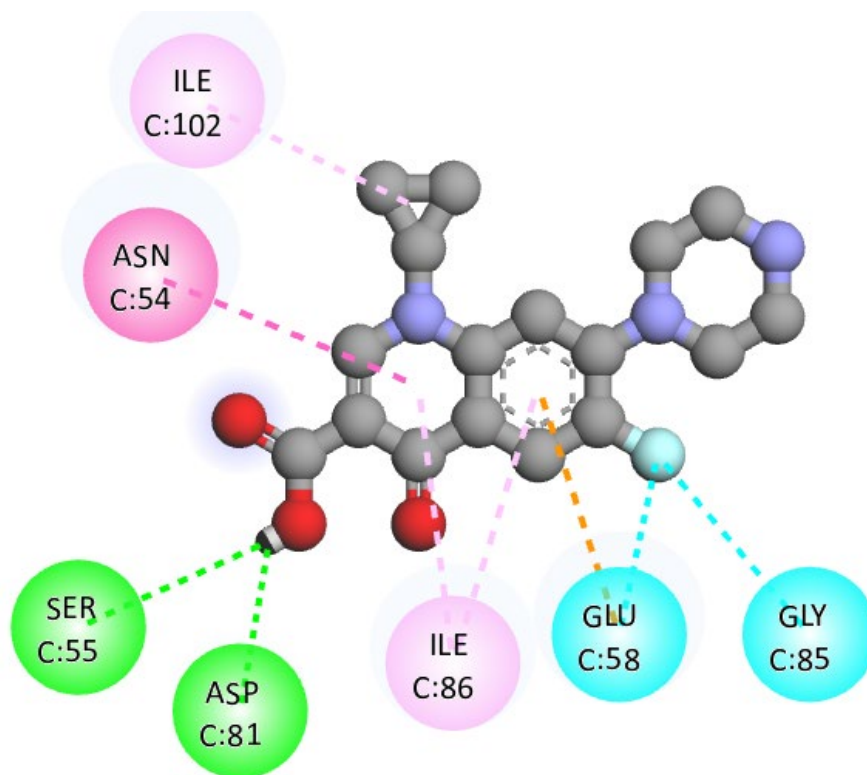

### Interactions

|                                                                                     |                            |                                                                                     |                  |
|-------------------------------------------------------------------------------------|----------------------------|-------------------------------------------------------------------------------------|------------------|
|  | Conventional Hydrogen Bond |  | Amide-Pi Stacked |
|  | Halogen (Fluorine)         |  | Alkyl            |
|  | Pi-Anion                   |  | Pi-Alkyl         |

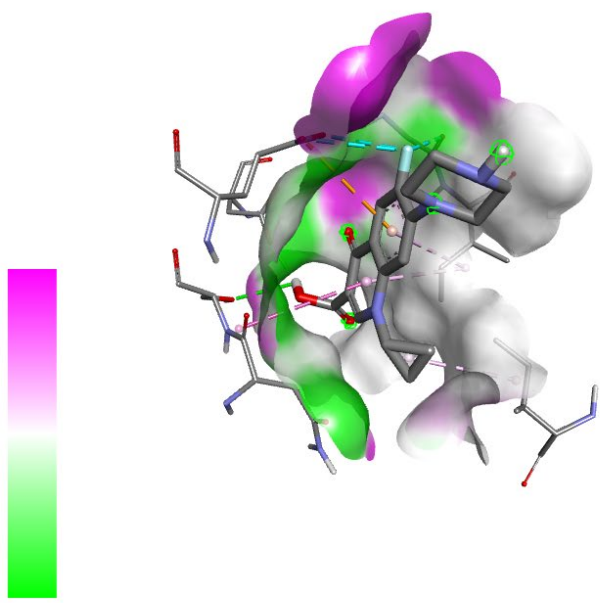

## 2.7. Compound PTX

```
#####  
# If you used AutoDock Vina in your work, please cite:      #  
#                                                            #  
# O. Trott, A. J. Olson,                                    #  
# AutoDock Vina: improving the speed and accuracy of docking #  
# with a new scoring function, efficient optimization and    #  
# multithreading, Journal of Computational Chemistry 31 (2010) #  
# 455-461                                                    #  
#                                                            #  
# DOI 10.1002/jcc.21334                                     #  
#                                                            #  
# Please see http://vina.scripps.edu for more information. #  
#####
```

```
Detected 8 CPUs  
Reading input ... done.  
Setting up the scoring function ... done.  
Analyzing the binding site ... done.  
Using random seed: 934984084  
Performing search ... done.  
Refining results ... done.
```

| mode | affinity<br>(kcal/mol) | dist from best mode<br>rmsd l.b. | rmsd u.b. |
|------|------------------------|----------------------------------|-----------|
| 1    | -7.8                   | 0.000                            | 0.000     |
| 2    | -7.6                   | 2.335                            | 4.921     |
| 3    | -7.5                   | 2.945                            | 8.770     |
| 4    | -7.4                   | 3.629                            | 9.582     |
| 5    | -7.4                   | 3.099                            | 6.925     |
| 6    | -7.3                   | 2.977                            | 7.101     |
| 7    | -7.3                   | 4.177                            | 10.014    |
| 8    | -7.3                   | 3.805                            | 7.256     |
| 9    | -7.2                   | 2.564                            | 5.400     |

```
Writing output ... done.
```



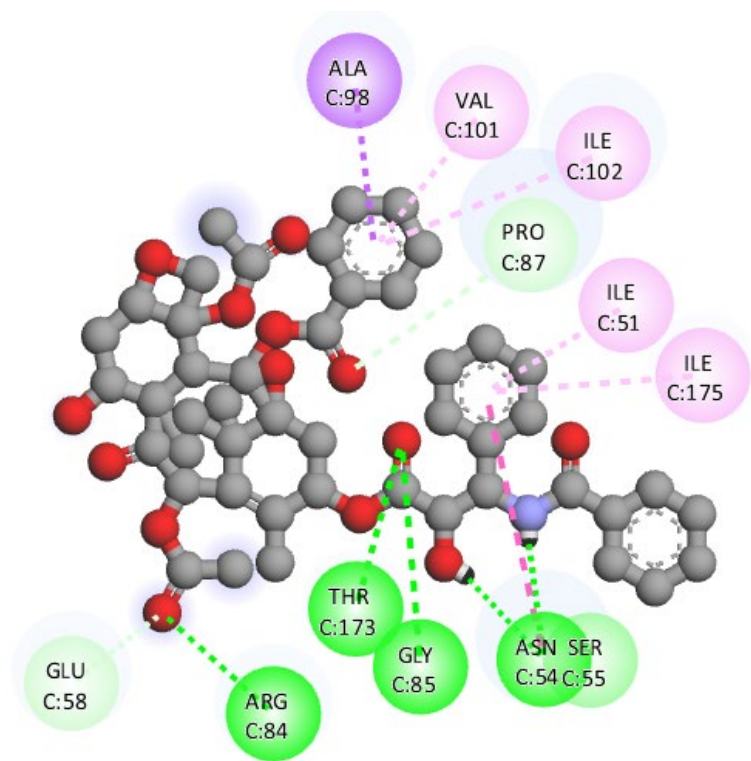

**Interactions**

- |                                                                                     |                            |                                                                                     |                  |
|-------------------------------------------------------------------------------------|----------------------------|-------------------------------------------------------------------------------------|------------------|
|  | van der Waals              |  | Pi-Sigma         |
|  | Conventional Hydrogen Bond |  | Amide-Pi Stacked |
|  | Carbon Hydrogen Bond       |  | Pi-Alkyl         |

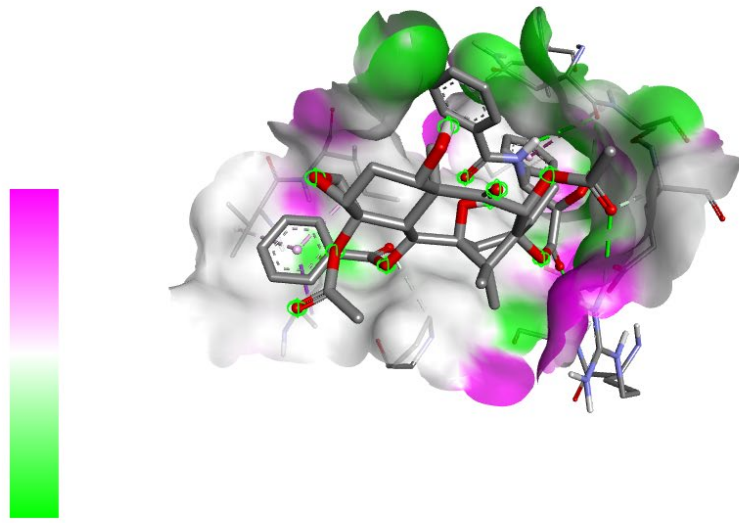

### 3. Dihydrofolate Reductase - Fungi (PDB: 4HOF)

Grid box volume – Autodock Vina

```
receptor = 4hofDHFRF.pdbqt  
ligand = ligand.pdbqt
```

```
out = out.pdbqt
```

```
center_x = 11.44  
center_y = -32.6283  
center_z = 17.3865
```

```
size_x = 30  
size_y = 30  
size_z = 30
```

```
energy_range = 4
```

```
exhaustiveness = 8
```

### 3.1. Compound 1d

```
#####  
# If you used AutoDock Vina in your work, please cite:      #  
#                                                            #  
# O. Trott, A. J. Olson,                                     #  
# AutoDock Vina: improving the speed and accuracy of docking #  
# with a new scoring function, efficient optimization and    #  
# multithreading, Journal of Computational Chemistry 31 (2010) #  
# 455-461                                                    #  
#                                                            #  
# DOI 10.1002/jcc.21334                                     #  
#                                                            #  
# Please see http://vina.scripps.edu for more information. #  
#####
```

```
Detected 8 CPUs  
Reading input ... done.  
Setting up the scoring function ... done.  
Analyzing the binding site ... done.  
Using random seed: 1088034812  
Performing search ... done.  
Refining results ... done.
```

| mode | affinity<br>(kcal/mol) | dist from best mode<br>rmsd l.b. | rmsd u.b. |
|------|------------------------|----------------------------------|-----------|
| 1    | -7.7                   | 0.000                            | 0.000     |
| 2    | -7.5                   | 3.816                            | 5.519     |
| 3    | -7.5                   | 11.587                           | 12.965    |
| 4    | -7.4                   | 3.840                            | 8.177     |
| 5    | -7.3                   | 10.822                           | 13.066    |
| 6    | -7.3                   | 4.128                            | 5.821     |
| 7    | -7.2                   | 4.146                            | 6.107     |
| 8    | -7.0                   | 3.393                            | 7.813     |
| 9    | -7.0                   | 11.930                           | 14.135    |

```
Writing output ... done.
```

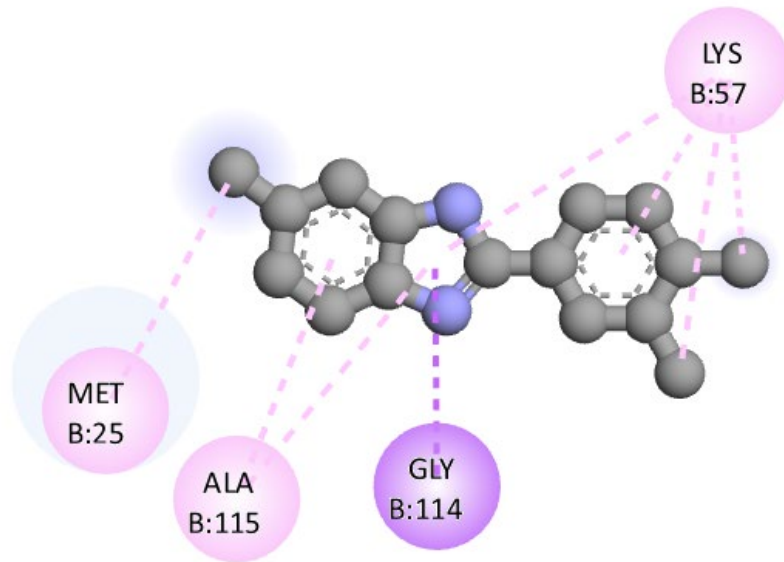

**Interactions**

 Pi-Sigma  
 Alkyl

 Pi-Alkyl

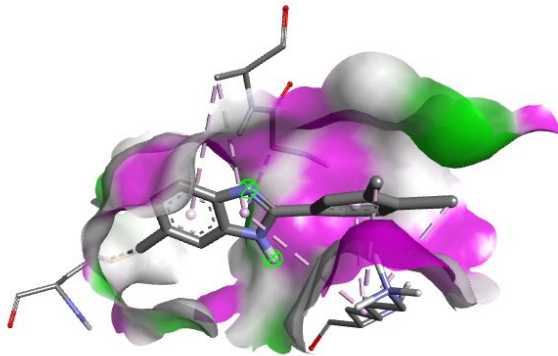

### 3.2. Compound 2d

```
#####  
# If you used AutoDock Vina in your work, please cite:      #  
#                                                            #  
# O. Trott, A. J. Olson,                                    #  
# AutoDock Vina: improving the speed and accuracy of docking #  
# with a new scoring function, efficient optimization and    #  
# multithreading, Journal of Computational Chemistry 31 (2010) #  
# 455-461                                                    #  
#                                                            #  
# DOI 10.1002/jcc.21334                                     #  
#                                                            #  
# Please see http://vina.scripps.edu for more information. #  
#####
```

```
Detected 8 CPUs  
Reading input ... done.  
Setting up the scoring function ... done.  
Analyzing the binding site ... done.  
Using random seed: 704858144  
Performing search ... done.  
Refining results ... done.
```

| mode | affinity<br>(kcal/mol) | dist from best mode<br>rmsd l.b. | rmsd u.b. |
|------|------------------------|----------------------------------|-----------|
| 1    | -8.4                   | 0.000                            | 0.000     |
| 2    | -8.1                   | 9.183                            | 10.969    |
| 3    | -8.0                   | 5.153                            | 7.495     |
| 4    | -8.0                   | 1.604                            | 2.344     |
| 5    | -7.7                   | 8.695                            | 10.156    |
| 6    | -7.6                   | 6.851                            | 8.750     |
| 7    | -7.5                   | 3.945                            | 4.880     |
| 8    | -7.4                   | 8.625                            | 10.773    |
| 9    | -7.3                   | 3.736                            | 4.817     |

```
Writing output ... done.
```

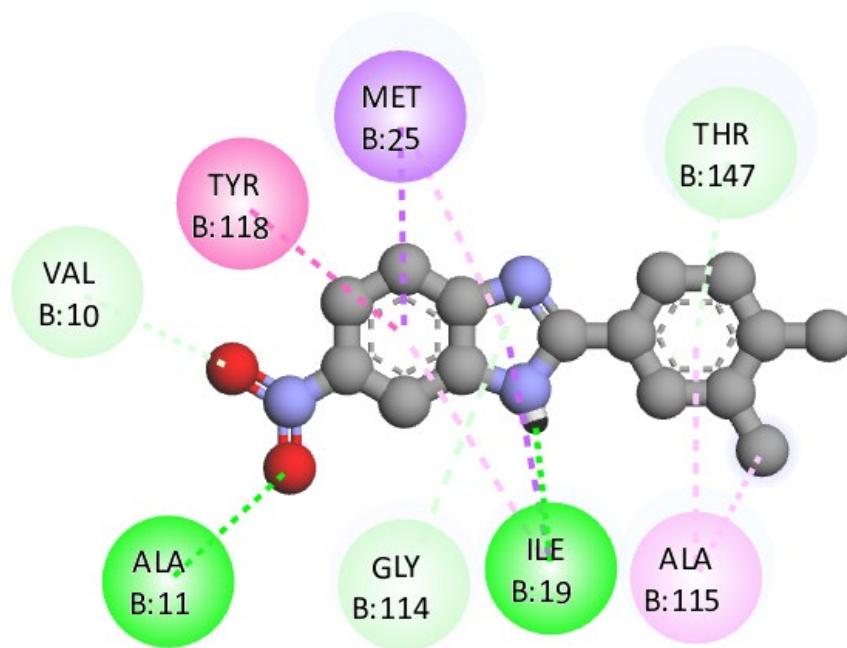

### Interactions

|                                                                                     |                            |                                                                                     |                |
|-------------------------------------------------------------------------------------|----------------------------|-------------------------------------------------------------------------------------|----------------|
|  | Conventional Hydrogen Bond |  | Pi-Pi T-shaped |
|  | Carbon Hydrogen Bond       |  | Alkyl          |
|  | Pi-Donor Hydrogen Bond     |  | Pi-Alkyl       |
|  | Pi-Sigma                   |                                                                                     |                |



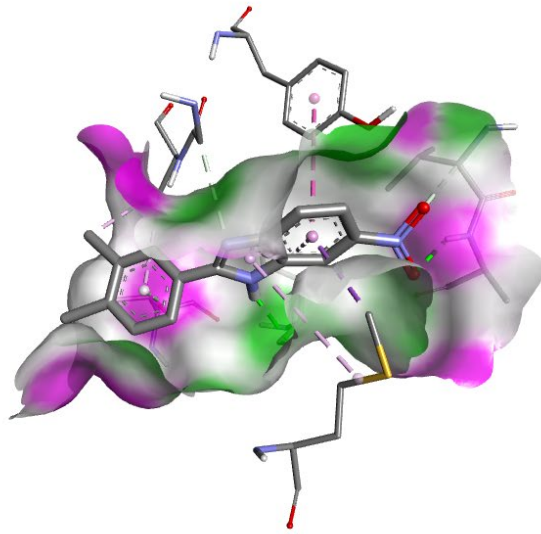

### 3.3. Compound 3s

```
#####  
# If you used AutoDock Vina in your work, please cite:      #  
#                                                            #  
# O. Trott, A. J. Olson,                                    #  
# AutoDock Vina: improving the speed and accuracy of docking #  
# with a new scoring function, efficient optimization and    #  
# multithreading, Journal of Computational Chemistry 31 (2010) #  
# 455-461                                                    #  
#                                                            #  
# DOI 10.1002/jcc.21334                                     #  
#                                                            #  
# Please see http://vina.scripps.edu for more information. #  
#####
```

```
Detected 8 CPUs  
Reading input ... done.  
Setting up the scoring function ... done.  
Analyzing the binding site ... done.  
Using random seed: 1977351540  
Performing search ... done.  
Refining results ... done.
```

| mode | affinity<br>(kcal/mol) | dist from best mode |           |
|------|------------------------|---------------------|-----------|
|      |                        | rmsd l.b.           | rmsd u.b. |
| 1    | -8.4                   | 0.000               | 0.000     |
| 2    | -8.1                   | 2.707               | 4.651     |
| 3    | -8.0                   | 11.550              | 14.767    |
| 4    | -8.0                   | 1.965               | 2.777     |
| 5    | -7.8                   | 2.013               | 3.949     |
| 6    | -7.7                   | 3.706               | 6.036     |
| 7    | -7.7                   | 2.939               | 4.856     |
| 8    | -7.5                   | 11.765              | 14.733    |
| 9    | -7.0                   | 3.739               | 6.643     |

```
Writing output ... done.
```

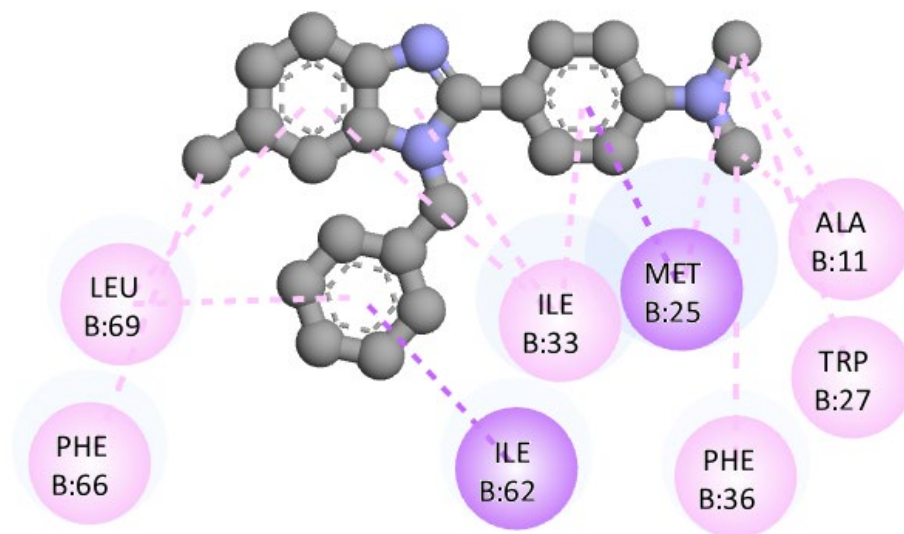

**Interactions**

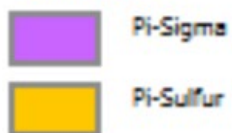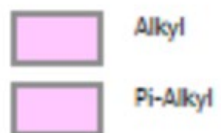

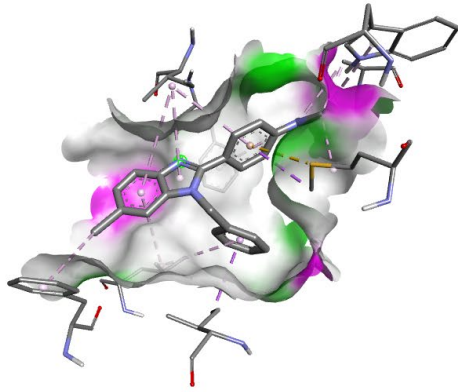

### 3.4. Compound 4b

```
#####  
# If you used AutoDock Vina in your work, please cite:      #  
#                                                            #  
# O. Trott, A. J. Olson,                                     #  
# AutoDock Vina: improving the speed and accuracy of docking #  
# with a new scoring function, efficient optimization and    #  
# multithreading, Journal of Computational Chemistry 31 (2010) #  
# 455-461                                                    #  
#                                                            #  
# DOI 10.1002/jcc.21334                                     #  
#                                                            #  
# Please see http://vina.scripps.edu for more information. #  
#####
```

```
Detected 8 CPUs  
Reading input ... done.  
Setting up the scoring function ... done.  
Analyzing the binding site ... done.  
Using random seed: -1619326992  
Performing search ... done.  
Refining results ... done.
```

| mode | affinity   | dist from best mode |           |
|------|------------|---------------------|-----------|
|      | (kcal/mol) | rmsd l.b.           | rmsd u.b. |
| 1    | -7.7       | 0.000               | 0.000     |
| 2    | -7.7       | 8.822               | 10.863    |
| 3    | -7.5       | 9.125               | 10.949    |
| 4    | -7.2       | 9.856               | 11.960    |
| 5    | -7.2       | 9.068               | 10.650    |
| 6    | -7.0       | 10.381              | 12.862    |
| 7    | -6.8       | 4.970               | 7.567     |
| 8    | -6.7       | 3.759               | 5.245     |
| 9    | -6.7       | 10.118              | 12.266    |

```
Writing output ... done.
```

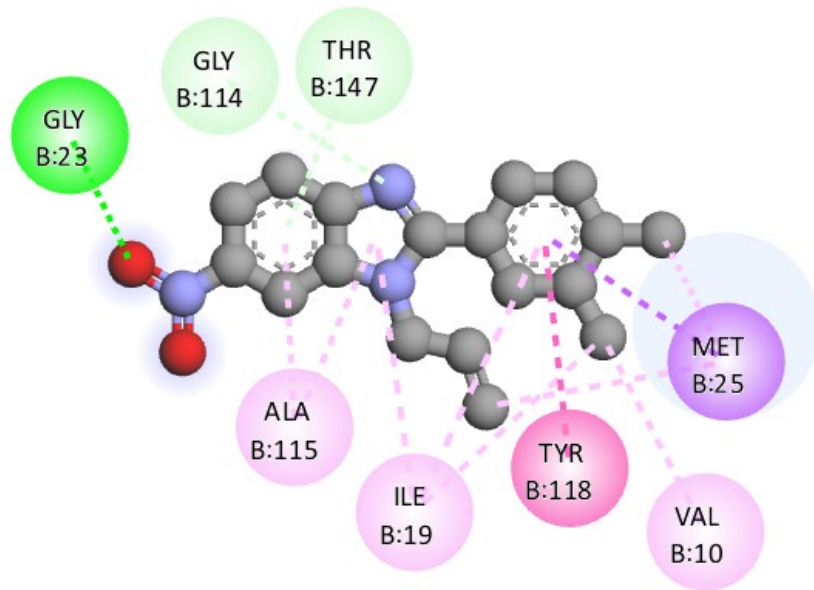

### Interactions

|                                                                                     |                            |                                                                                     |                |
|-------------------------------------------------------------------------------------|----------------------------|-------------------------------------------------------------------------------------|----------------|
|  | Conventional Hydrogen Bond |  | Pi-Pi T-shaped |
|  | Carbon Hydrogen Bond       |  | Alkyl          |
|  | Pi-Donor Hydrogen Bond     |  | Pi-Alkyl       |
|  | Pi-Sigma                   |                                                                                     |                |

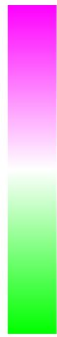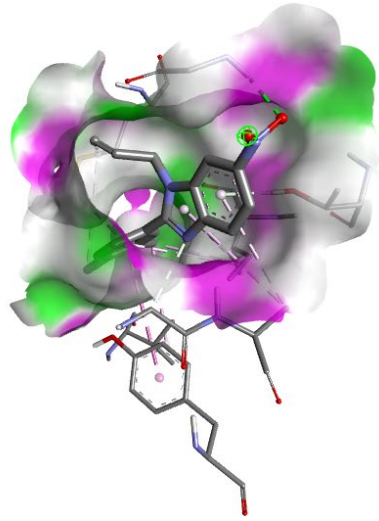

### 3.5. Compound 4k

```
#####  
# If you used AutoDock Vina in your work, please cite:      #  
#                                                           #  
# O. Trott, A. J. Olson,                                    #  
# AutoDock Vina: improving the speed and accuracy of docking #  
# with a new scoring function, efficient optimization and    #  
# multithreading, Journal of Computational Chemistry 31 (2010) #  
# 455-461                                                    #  
#                                                           #  
# DOI 10.1002/jcc.21334                                     #  
#                                                           #  
# Please see http://vina.scripps.edu for more information. #  
#####
```

```
Detected 8 CPUs  
Reading input ... done.  
Setting up the scoring function ... done.  
Analyzing the binding site ... done.  
Using random seed: 817433168  
Performing search ... done.  
Refining results ... done.
```

| mode | affinity   | dist from best mode |           |
|------|------------|---------------------|-----------|
|      | (kcal/mol) | rmsd l.b.           | rmsd u.b. |
| 1    | -8.2       | 0.000               | 0.000     |
| 2    | -8.1       | 4.020               | 6.603     |
| 3    | -7.6       | 12.333              | 14.551    |
| 4    | -7.6       | 3.905               | 7.122     |
| 5    | -7.3       | 12.382              | 15.322    |
| 6    | -7.2       | 12.440              | 15.297    |
| 7    | -7.1       | 15.866              | 17.991    |
| 8    | -6.6       | 14.639              | 17.928    |
| 9    | -6.6       | 13.676              | 16.414    |

```
Writing output ... done.
```



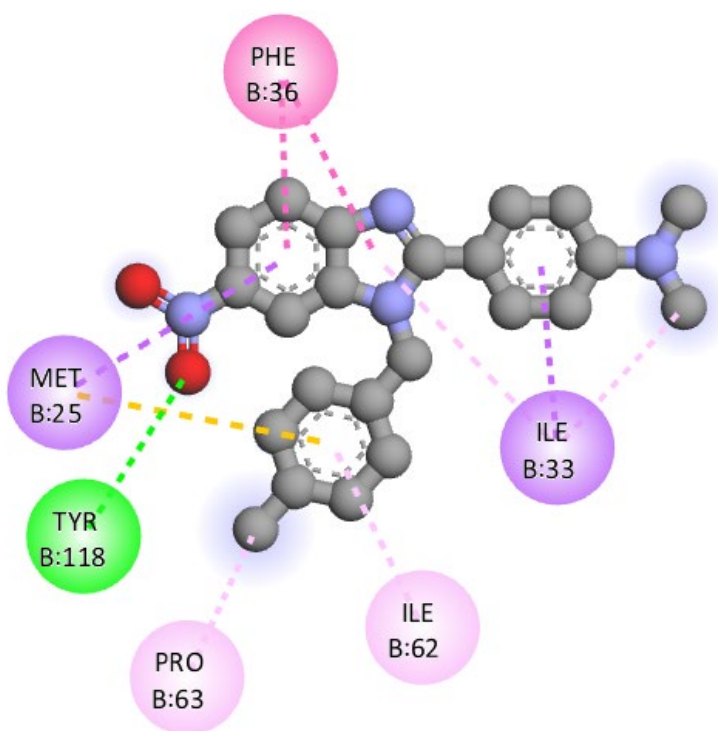

**Interactions**

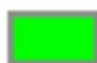

Conventional Hydrogen Bond

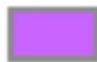

Pi-Sigma

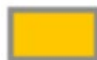

Pi-Sulfur

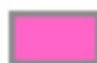

Pi-Pi Stacked

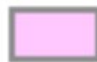

Alkyl

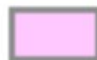

Pi-Alkyl

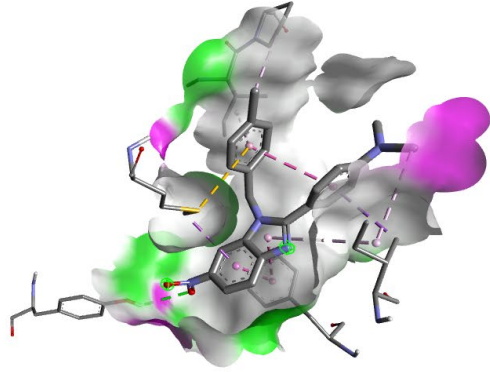

### 3.6. Compound Flu

```
#####  
# If you used AutoDock Vina in your work, please cite:      #  
#                                                            #  
# O. Trott, A. J. Olson,                                    #  
# AutoDock Vina: improving the speed and accuracy of docking #  
# with a new scoring function, efficient optimization and    #  
# multithreading, Journal of Computational Chemistry 31 (2010) #  
# 455-461                                                    #  
#                                                            #  
# DOI 10.1002/jcc.21334                                     #  
#                                                            #  
# Please see http://vina.scripps.edu for more information. #  
#####
```

```
Detected 8 CPUs  
Reading input ... done.  
Setting up the scoring function ... done.  
Analyzing the binding site ... done.  
Using random seed: -1446104232  
Performing search ... done.  
Refining results ... done.
```

| mode | affinity<br>(kcal/mol) | dist from best mode |           |
|------|------------------------|---------------------|-----------|
|      |                        | rmsd l.b.           | rmsd u.b. |
| 1    | -7.0                   | 0.000               | 0.000     |
| 2    | -6.9                   | 0.967               | 3.654     |
| 3    | -6.6                   | 6.812               | 8.965     |
| 4    | -6.5                   | 15.477              | 17.482    |
| 5    | -6.3                   | 6.744               | 9.198     |
| 6    | -6.3                   | 6.201               | 8.334     |
| 7    | -6.3                   | 6.133               | 8.712     |
| 8    | -6.2                   | 16.145              | 17.921    |
| 9    | -6.2                   | 5.952               | 8.003     |

```
Writing output ... done.
```

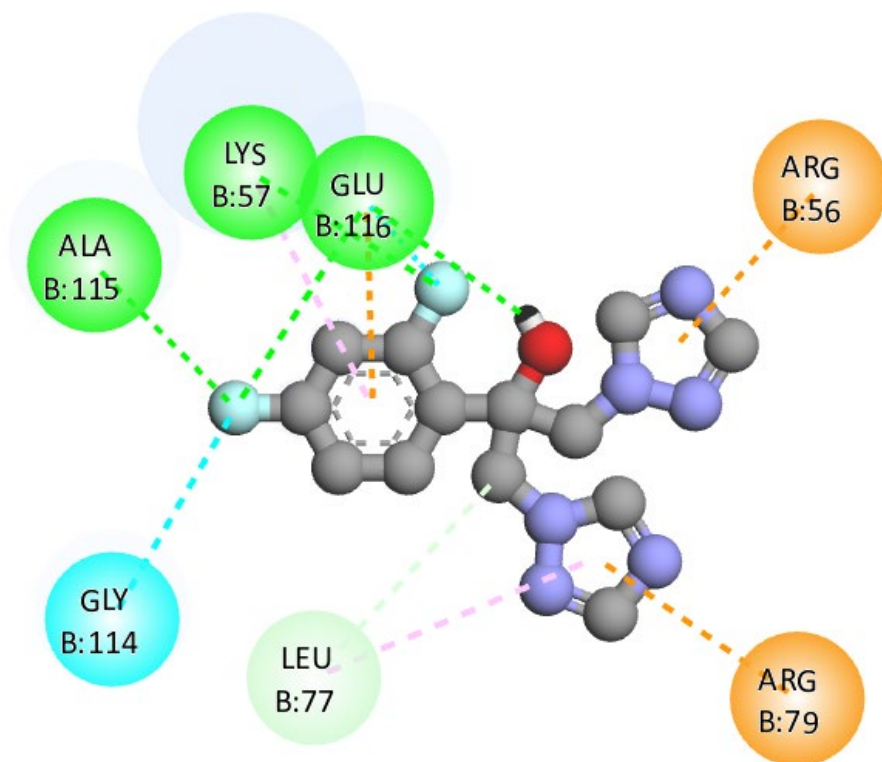

**Interactions**

|                                                                                     |                            |                                                                                     |           |
|-------------------------------------------------------------------------------------|----------------------------|-------------------------------------------------------------------------------------|-----------|
|  | Conventional Hydrogen Bond |  | Pi-Cation |
|  | Carbon Hydrogen Bond       |  | Pi-Anion  |
|  | Halogen (Fluorine)         |  | Pi-Alkyl  |

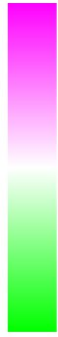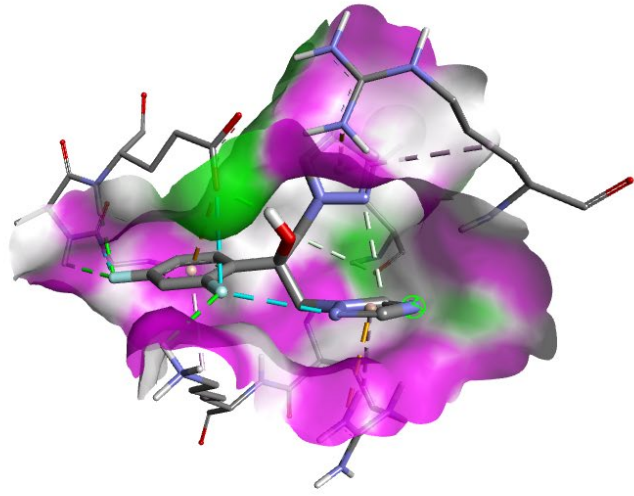

### 3.7. Compound PTX

```
#####  
# If you used AutoDock Vina in your work, please cite:      #  
#                                                            #  
# O. Trott, A. J. Olson,                                     #  
# AutoDock Vina: improving the speed and accuracy of docking #  
# with a new scoring function, efficient optimization and    #  
# multithreading, Journal of Computational Chemistry 31 (2010) #  
# 455-461                                                    #  
#                                                            #  
# DOI 10.1002/jcc.21334                                     #  
#                                                            #  
# Please see http://vina.scripps.edu for more information. #  
#####
```

```
Detected 8 CPUs  
Reading input ... done.  
Setting up the scoring function ... done.  
Analyzing the binding site ... done.  
Using random seed: -1298481664  
Performing search ... done.  
Refining results ... done.
```

| mode | affinity   | dist from best mode |           |
|------|------------|---------------------|-----------|
|      | (kcal/mol) | rmsd l.b.           | rmsd u.b. |
| 1    | -8.5       | 0.000               | 0.000     |
| 2    | -8.4       | 11.499              | 19.266    |
| 3    | -8.3       | 14.515              | 22.467    |
| 4    | -8.1       | 11.057              | 19.824    |
| 5    | -7.9       | 9.306               | 14.573    |
| 6    | -7.7       | 11.349              | 17.544    |
| 7    | -7.7       | 10.169              | 14.970    |
| 8    | -7.5       | 9.634               | 17.562    |
| 9    | -7.5       | 14.073              | 22.233    |

```
Writing output ... done.
```

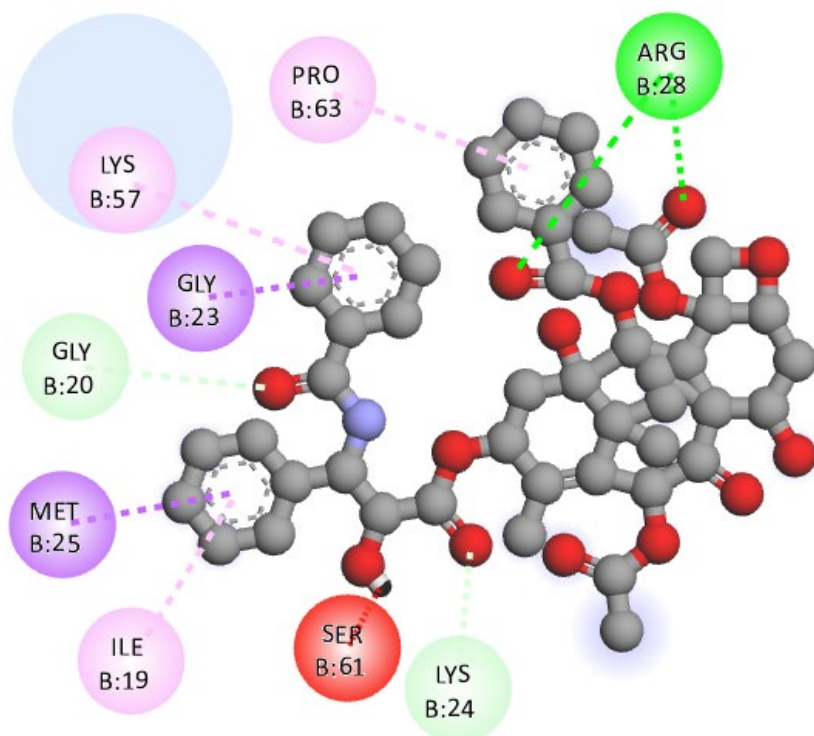

**Interactions**

|                                                                                     |                            |                                                                                     |                  |
|-------------------------------------------------------------------------------------|----------------------------|-------------------------------------------------------------------------------------|------------------|
|  | Conventional Hydrogen Bond |  | Pi-Sigma         |
|  | Carbon Hydrogen Bond       |  | Amide-Pi Stacked |
|  | Unfavorable Donor-Donor    |  | Pi-Alkyl         |

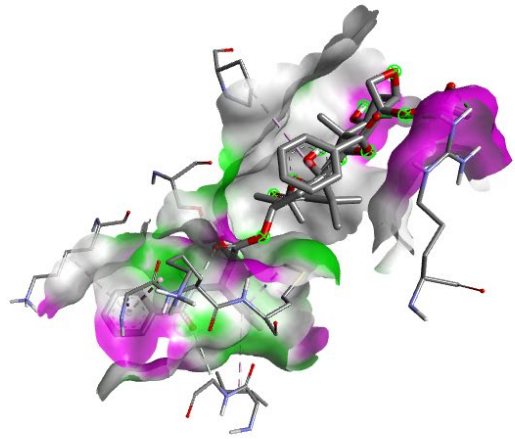



#### 4. *N*-myristoyl Transferase (PDB: 1IYL)

Grid box volume – Autodock Vina

```
receptor = 1iy1NMTF.pdbqt  
ligand = ligand.pdbqt
```

```
out = out.pdbqt
```

```
center_x = 12.6146  
center_y = 47.7652  
center_z = -0.440754
```

```
size_x = 25  
size_y = 25  
size_z = 25
```

```
energy_range = 4  
exhaustiveness = 8
```

#### 4.1. Compound 1d

```
#####  
# If you used AutoDock Vina in your work, please cite:      #  
#                                                            #  
# O. Trott, A. J. Olson,                                     #  
# AutoDock Vina: improving the speed and accuracy of docking #  
# with a new scoring function, efficient optimization and    #  
# multithreading, Journal of Computational Chemistry 31 (2010) #  
# 455-461                                                    #  
#                                                            #  
# DOI 10.1002/jcc.21334                                     #  
#                                                            #  
# Please see http://vina.scripps.edu for more information. #  
#####
```

```
Detected 8 CPUs  
Reading input ... done.  
Setting up the scoring function ... done.  
Analyzing the binding site ... done.  
Using random seed: 1767034448  
Performing search ... done.  
Refining results ... done.
```

| mode | affinity<br>(kcal/mol) | dist from best mode<br>rmsd l.b. | rmsd u.b. |
|------|------------------------|----------------------------------|-----------|
| 1    | -10.1                  | 0.000                            | 0.000     |
| 2    | -9.4                   | 1.023                            | 1.777     |
| 3    | -9.4                   | 1.309                            | 6.723     |
| 4    | -9.1                   | 1.230                            | 6.804     |
| 5    | -8.6                   | 4.123                            | 6.304     |
| 6    | -8.2                   | 2.222                            | 7.256     |
| 7    | -8.0                   | 1.620                            | 7.250     |
| 8    | -7.9                   | 4.043                            | 7.410     |
| 9    | -7.9                   | 2.519                            | 7.563     |

```
Writing output ... done.
```

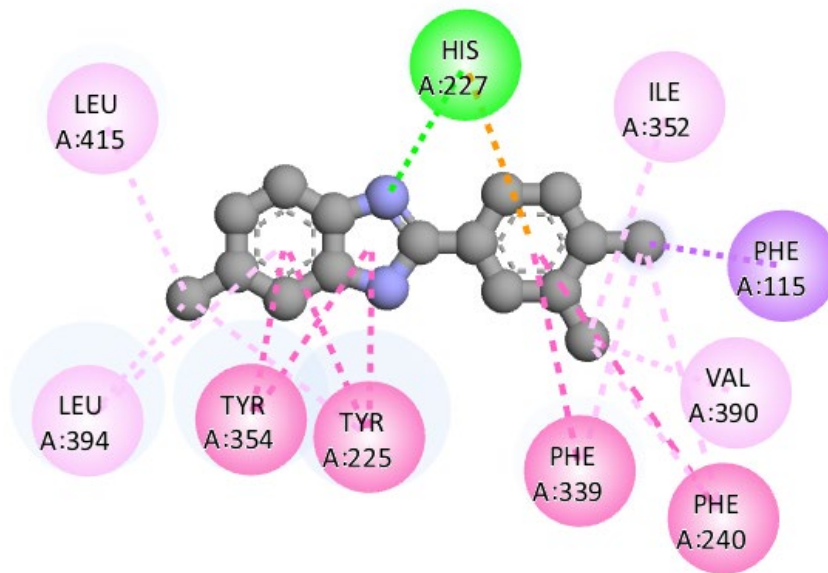

**Interactions**

- Conventional Hydrogen Bond
- Pi-Cation
- Pi-Sigma
- Pi-Pi Stacked

- Pi-Pi T-shaped
- Alkyl
- Pi-Alkyl

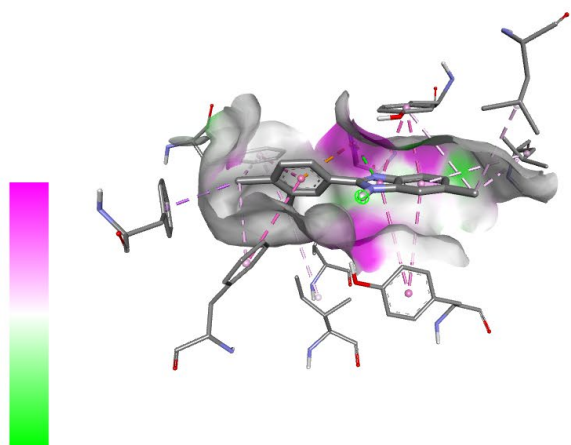

## 4.2. Compound 2d

```
#####  
# If you used AutoDock Vina in your work, please cite:      #  
#                                                           #  
# O. Trott, A. J. Olson,                                    #  
# AutoDock Vina: improving the speed and accuracy of docking #  
# with a new scoring function, efficient optimization and   #  
# multithreading, Journal of Computational Chemistry 31 (2010) #  
# 455-461                                                    #  
#                                                           #  
# DOI 10.1002/jcc.21334                                     #  
#                                                           #  
# Please see http://vina.scripps.edu for more information. #  
#####
```

```
Detected 8 CPUs  
Reading input ... done.  
Setting up the scoring function ... done.  
Analyzing the binding site ... done.  
Using random seed: 2050863144  
Performing search ... done.  
Refining results ... done.
```

| mode | affinity<br>(kcal/mol) | dist from best mode<br>rmsd l.b. | rmsd u.b. |
|------|------------------------|----------------------------------|-----------|
| 1    | -10.1                  | 0.000                            | 0.000     |
| 2    | -8.8                   | 1.645                            | 2.214     |
| 3    | -8.6                   | 5.139                            | 6.787     |
| 4    | -8.6                   | 5.302                            | 7.524     |
| 5    | -8.5                   | 4.511                            | 6.378     |
| 6    | -8.5                   | 5.315                            | 7.747     |
| 7    | -8.2                   | 5.188                            | 7.562     |
| 8    | -8.0                   | 5.233                            | 7.579     |
| 9    | -7.8                   | 4.789                            | 6.348     |

```
Writing output ... done.
```

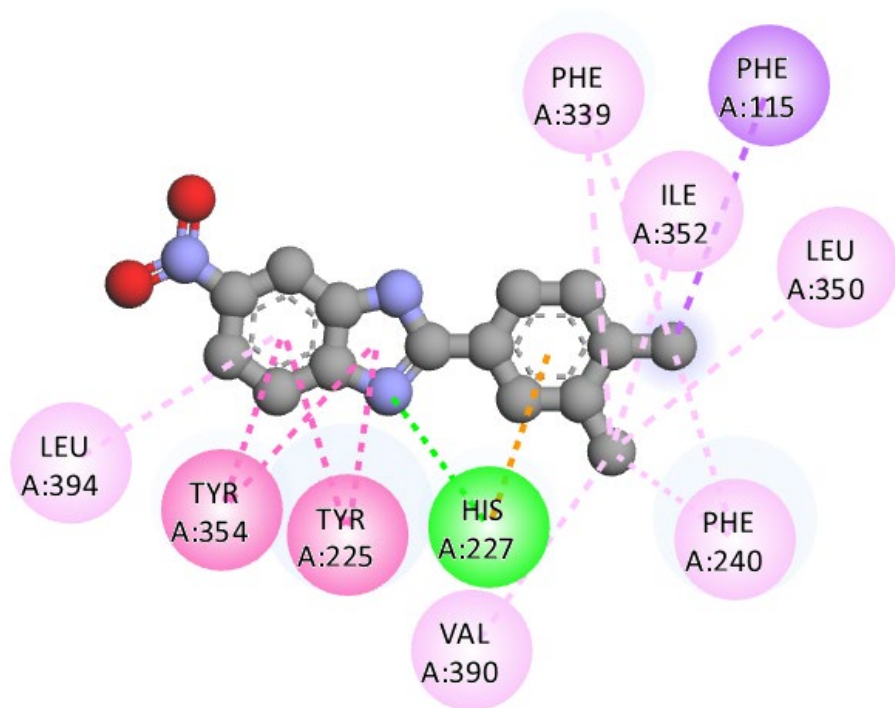

### Interactions

|                                                                                     |                            |                                                                                     |                |
|-------------------------------------------------------------------------------------|----------------------------|-------------------------------------------------------------------------------------|----------------|
|  | Conventional Hydrogen Bond |  | Pi-Pi T-shaped |
|  | Pi-Cation                  |  | Alkyl          |
|  | Pi-Sigma                   |  | Pi-Alkyl       |
|  | Pi-Pi Stacked              |                                                                                     |                |

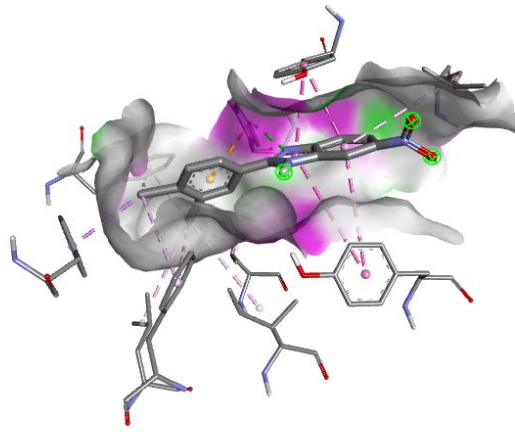

### 4.3. Compound 3s

```
#####  
# If you used AutoDock Vina in your work, please cite:      #  
#                                                            #  
# O. Trott, A. J. Olson,                                    #  
# AutoDock Vina: improving the speed and accuracy of docking #  
# with a new scoring function, efficient optimization and    #  
# multithreading, Journal of Computational Chemistry 31 (2010) #  
# 455-461                                                    #  
#                                                            #  
# DOI 10.1002/jcc.21334                                     #  
#                                                            #  
# Please see http://vina.scripps.edu for more information. #  
#####
```

```
Detected 8 CPUs  
Reading input ... done.  
Setting up the scoring function ... done.  
Analyzing the binding site ... done.  
Using random seed: -340508208  
Performing search ... done.  
Refining results ... done.
```

| mode | affinity<br>(kcal/mol) | dist from best mode<br>rmsd l.b. | rmsd u.b. |
|------|------------------------|----------------------------------|-----------|
| 1    | -9.6                   | 0.000                            | 0.000     |
| 2    | -9.5                   | 2.659                            | 6.568     |
| 3    | -9.3                   | 2.722                            | 4.910     |
| 4    | -9.1                   | 3.504                            | 7.534     |
| 5    | -8.9                   | 7.666                            | 9.685     |
| 6    | -8.6                   | 1.818                            | 2.549     |
| 7    | -8.6                   | 5.244                            | 8.644     |
| 8    | -8.5                   | 3.660                            | 7.901     |
| 9    | -8.5                   | 4.216                            | 8.579     |

```
Writing output ... done.
```



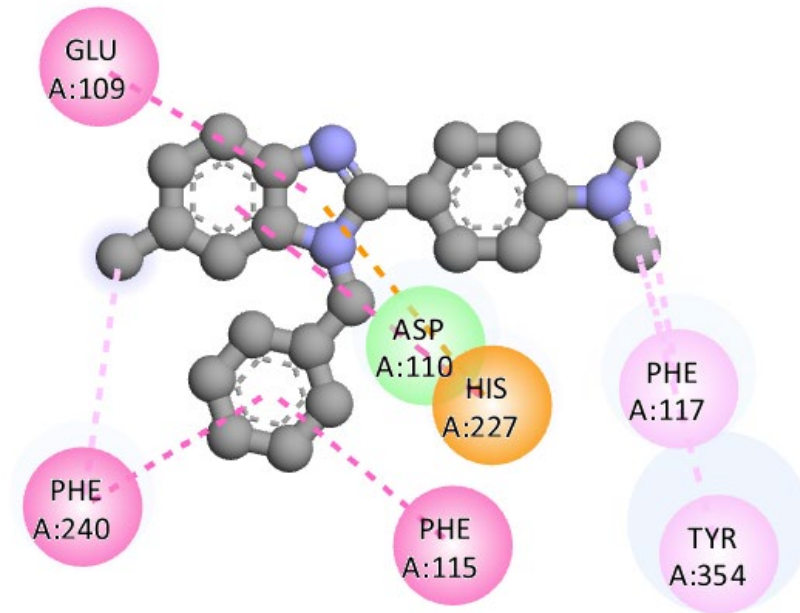

### Interactions

|                                                                                     |               |
|-------------------------------------------------------------------------------------|---------------|
|  | van der Waals |
|  | Pi-Cation     |
|  | Pi-Pi Stacked |

|                                                                                     |                  |
|-------------------------------------------------------------------------------------|------------------|
|  | Pi-Pi T-shaped   |
|  | Amide-Pi Stacked |
|  | Pi-Alkyl         |

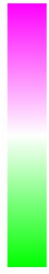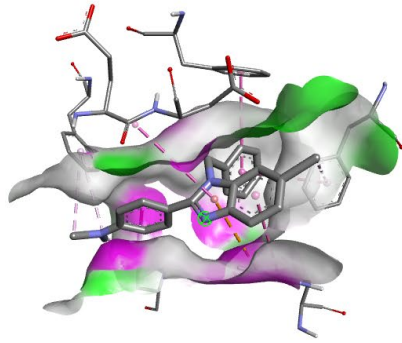

#### 4.4. Compound 4b

```
#####  
# If you used AutoDock Vina in your work, please cite:      #  
#                                                            #  
# O. Trott, A. J. Olson,                                    #  
# AutoDock Vina: improving the speed and accuracy of docking #  
# with a new scoring function, efficient optimization and    #  
# multithreading, Journal of Computational Chemistry 31 (2010) #  
# 455-461                                                    #  
#                                                            #  
# DOI 10.1002/jcc.21334                                     #  
#                                                            #  
# Please see http://vina.scripps.edu for more information. #  
#####
```

```
Detected 8 CPUs  
Reading input ... done.  
Setting up the scoring function ... done.  
Analyzing the binding site ... done.  
Using random seed: -512187988  
Performing search ... done.  
Refining results ... done.
```

| mode | affinity   | dist from best mode |           |
|------|------------|---------------------|-----------|
|      | (kcal/mol) | rmsd l.b.           | rmsd u.b. |
| 1    | -9.9       | 0.000               | 0.000     |
| 2    | -8.6       | 4.939               | 7.033     |
| 3    | -8.4       | 4.479               | 6.800     |
| 4    | -8.3       | 1.971               | 2.712     |
| 5    | -8.3       | 4.364               | 5.710     |
| 6    | -8.1       | 3.785               | 5.001     |
| 7    | -8.0       | 4.703               | 6.653     |
| 8    | -8.0       | 5.801               | 8.024     |
| 9    | -8.0       | 4.510               | 6.027     |

```
Writing output ... done.
```

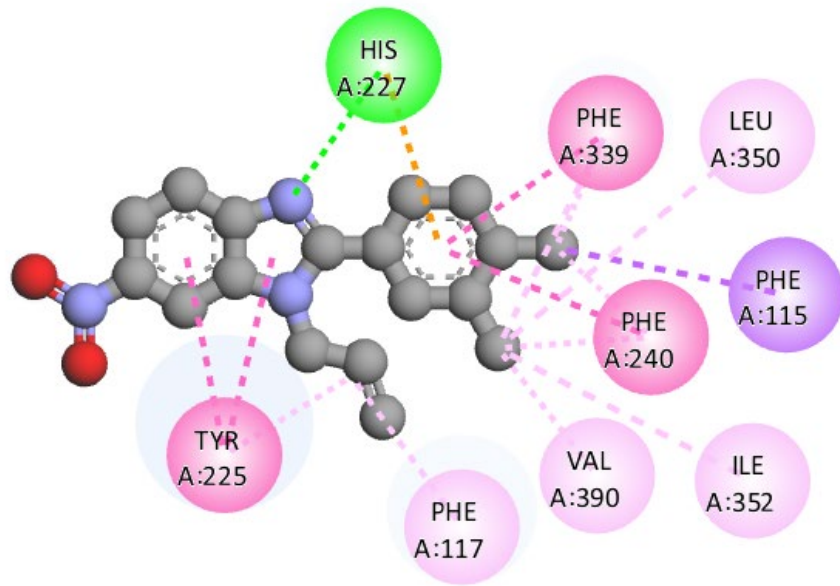

### Interactions

|                                                                                     |                            |                                                                                     |                |
|-------------------------------------------------------------------------------------|----------------------------|-------------------------------------------------------------------------------------|----------------|
|  | Conventional Hydrogen Bond |  | Pi-Pi T-shaped |
|  | Pi-Cation                  |  | Alkyl          |
|  | Pi-Sigma                   |  | Pi-Alkyl       |
|  | Pi-Pi Stacked              |                                                                                     |                |

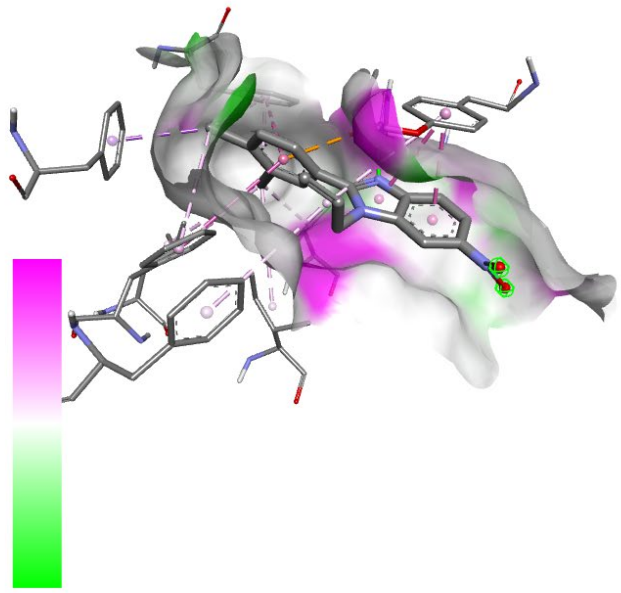

#### 4.5. Compound 4k

```
#####  
# If you used AutoDock Vina in your work, please cite:      #  
#                                                           #  
# O. Trott, A. J. Olson,                                    #  
# AutoDock Vina: improving the speed and accuracy of docking #  
# with a new scoring function, efficient optimization and    #  
# multithreading, Journal of Computational Chemistry 31 (2010) #  
# 455-461                                                    #  
#                                                           #  
# DOI 10.1002/jcc.21334                                     #  
#                                                           #  
# Please see http://vina.scripps.edu for more information. #  
#####
```

```
Detected 8 CPUs  
Reading input ... done.  
Setting up the scoring function ... done.  
Analyzing the binding site ... done.  
Using random seed: 1607913660  
Performing search ... done.  
Refining results ... done.
```

| mode | affinity   | dist from best mode |           |
|------|------------|---------------------|-----------|
|      | (kcal/mol) | rmsd l.b.           | rmsd u.b. |
| 1    | -9.9       | 0.000               | 0.000     |
| 2    | -9.6       | 3.411               | 5.568     |
| 3    | -9.6       | 5.043               | 8.727     |
| 4    | -9.5       | 4.965               | 8.316     |
| 5    | -9.3       | 3.735               | 6.602     |
| 6    | -9.0       | 3.039               | 5.013     |
| 7    | -8.9       | 3.906               | 5.786     |
| 8    | -8.9       | 3.998               | 7.333     |
| 9    | -8.9       | 2.262               | 3.264     |

```
Writing output ... done.
```

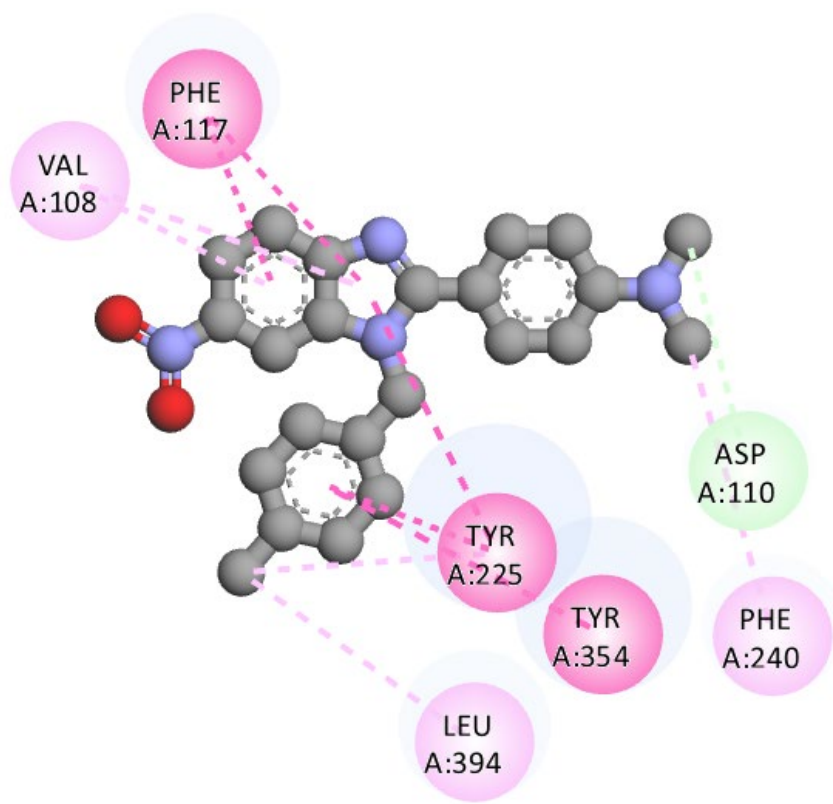

**Interactions**

- |                                                                                     |                      |                                                                                     |          |
|-------------------------------------------------------------------------------------|----------------------|-------------------------------------------------------------------------------------|----------|
|  | Carbon Hydrogen Bond |  | Alkyl    |
|  | Pi-Pi Stacked        |  | Pi-Alkyl |
|  | Pi-Pi T-shaped       |                                                                                     |          |

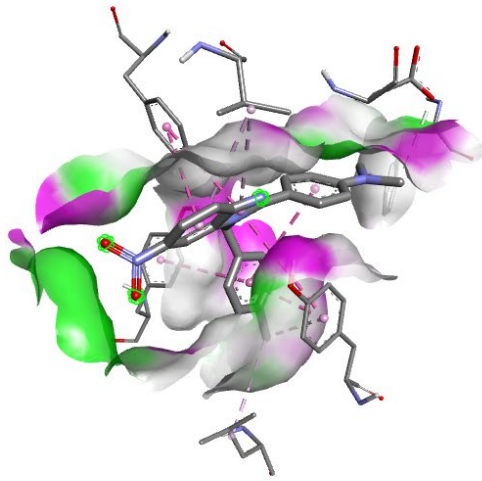



#### 4.6. Compound Flu

```
#####  
# If you used AutoDock Vina in your work, please cite:      #  
#                                                            #  
# O. Trott, A. J. Olson,                                     #  
# AutoDock Vina: improving the speed and accuracy of docking #  
# with a new scoring function, efficient optimization and    #  
# multithreading, Journal of Computational Chemistry 31 (2010) #  
# 455-461                                                    #  
#                                                            #  
# DOI 10.1002/jcc.21334                                     #  
#                                                            #  
# Please see http://vina.scripps.edu for more information. #  
#####
```

```
Detected 8 CPUs  
Reading input ... done.  
Setting up the scoring function ... done.  
Analyzing the binding site ... done.  
Using random seed: -1075688508  
Performing search ... done.  
Refining results ... done.
```

| mode | affinity<br>(kcal/mol) | dist from best mode<br>rmsd l.b. | rmsd u.b. |
|------|------------------------|----------------------------------|-----------|
| 1    | -7.9                   | 0.000                            | 0.000     |
| 2    | -7.8                   | 2.200                            | 2.868     |
| 3    | -7.8                   | 1.126                            | 3.929     |
| 4    | -7.3                   | 5.388                            | 7.088     |
| 5    | -7.3                   | 6.029                            | 8.223     |
| 6    | -7.1                   | 6.700                            | 8.796     |
| 7    | -7.1                   | 7.616                            | 9.573     |
| 8    | -7.1                   | 5.968                            | 7.483     |
| 9    | -7.0                   | 5.800                            | 8.368     |

```
Writing output ... done.
```

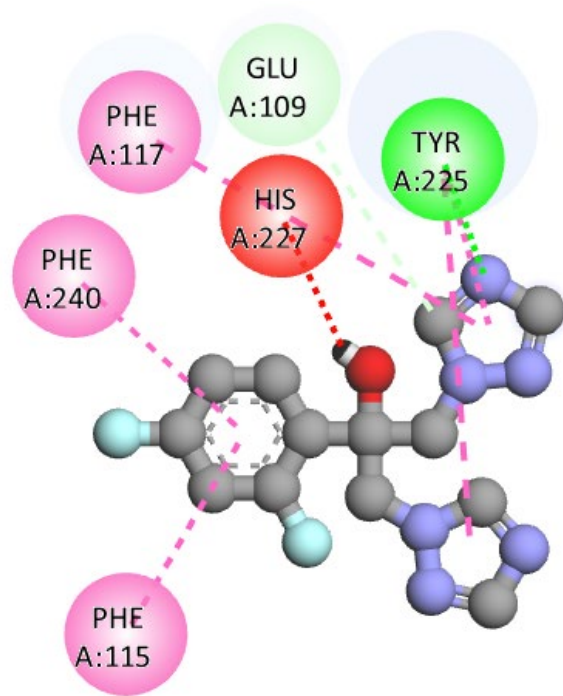

### Interactions

|                                                                                     |                            |                                                                                     |                |
|-------------------------------------------------------------------------------------|----------------------------|-------------------------------------------------------------------------------------|----------------|
|  | Conventional Hydrogen Bond |  | Pi-Pi Stacked  |
|  | Carbon Hydrogen Bond       |  | Pi-Pi T-shaped |
|  | Unfavorable Donor-Donor    |                                                                                     |                |

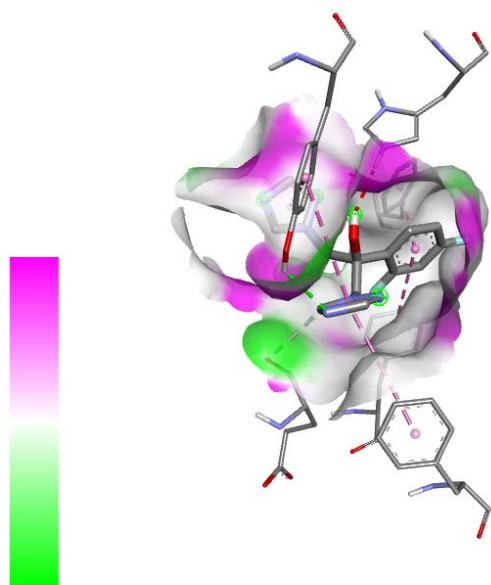

#### 4.7. Compound PTX

```
#####  
# If you used AutoDock Vina in your work, please cite:      #  
#                                                           #  
# O. Trott, A. J. Olson,                                    #  
# AutoDock Vina: improving the speed and accuracy of docking #  
# with a new scoring function, efficient optimization and    #  
# multithreading, Journal of Computational Chemistry 31 (2010) #  
# 455-461                                                    #  
#                                                           #  
# DOI 10.1002/jcc.21334                                     #  
#                                                           #  
# Please see http://vina.scripps.edu for more information. #  
#####
```

```
Detected 8 CPUs  
Reading input ... done.  
Setting up the scoring function ... done.  
Analyzing the binding site ... done.  
Using random seed: 1697931708  
Performing search ... done.  
Refining results ... done.
```

| mode | affinity<br>(kcal/mol) | dist from best mode |           |
|------|------------------------|---------------------|-----------|
|      |                        | rmsd l.b.           | rmsd u.b. |
| 1    | -11.4                  | 0.000               | 0.000     |
| 2    | -10.8                  | 1.142               | 3.784     |
| 3    | -10.0                  | 3.254               | 7.148     |
| 4    | -9.7                   | 1.651               | 4.239     |
| 5    | -9.5                   | 3.229               | 10.323    |
| 6    | -9.4                   | 3.191               | 7.252     |
| 7    | -9.3                   | 3.160               | 9.844     |
| 8    | -9.3                   | 2.344               | 3.916     |
| 9    | -8.5                   | 3.061               | 9.289     |

```
Writing output ... done.
```

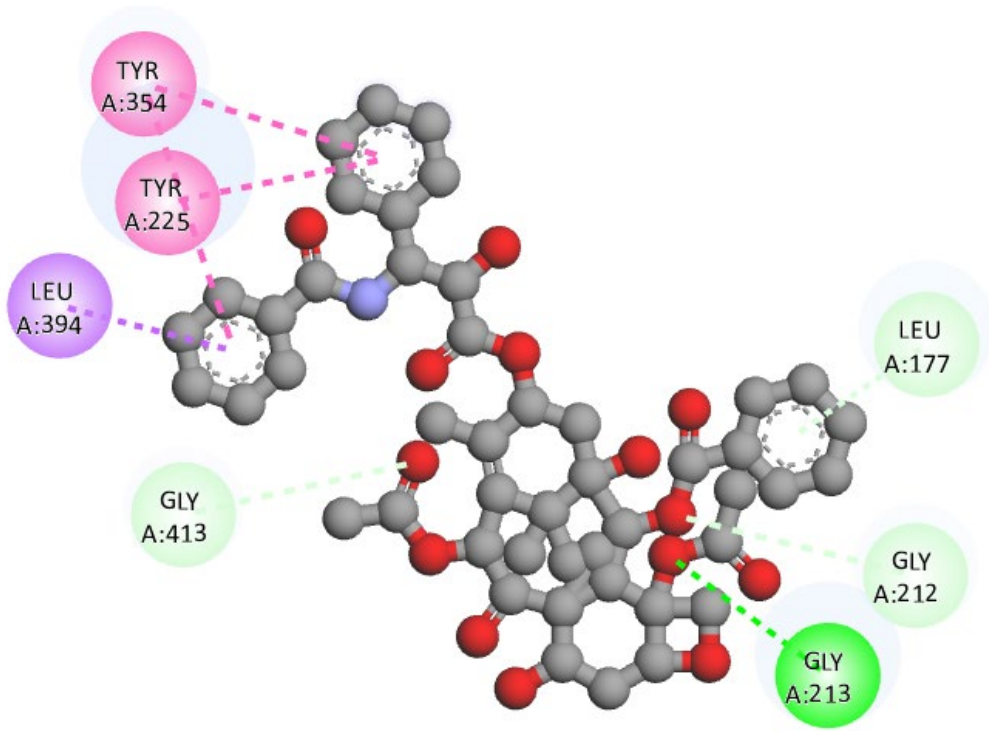

**Interactions**

- |                                                                                     |                            |                                                                                     |                |
|-------------------------------------------------------------------------------------|----------------------------|-------------------------------------------------------------------------------------|----------------|
|  | Conventional Hydrogen Bond |  | Pi-Sigma       |
|  | Carbon Hydrogen Bond       |  | Pi-Pi Stacked  |
|  | Pi-Donor Hydrogen Bond     |  | Pi-Pi T-shaped |

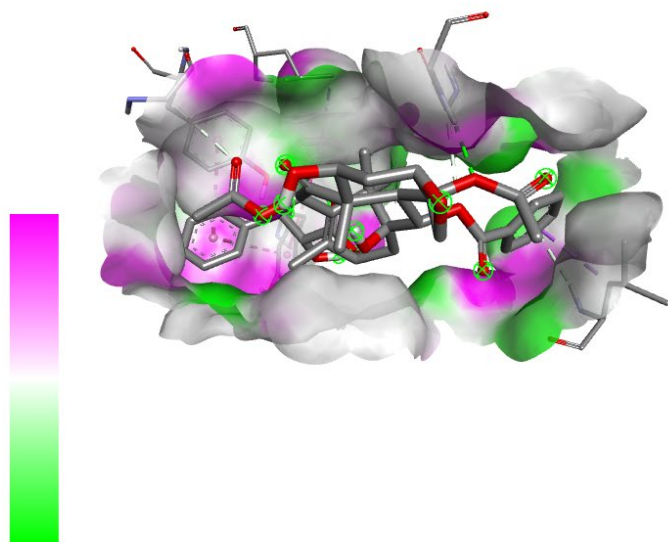

## 5. Vascular endothelial growth factor receptor 2 (PDB: 5EW3)

Grid box volume – Autodock Vina

```
receptor = 5ew3VEGFR2.pdbqt  
ligand = ligand.pdbqt
```

```
out = out.pdbqt
```

```
center_x = 18.728  
center_y = 9.165  
center_z = 12.278
```

```
size_x = 36  
size_y = 34  
size_z = 34
```

```
energy_range = 4  
exhaustiveness = 8
```

## 5.1. Compound 1d

```
#####  
# If you used AutoDock Vina in your work, please cite:      #  
#                                                            #  
# O. Trott, A. J. Olson,                                    #  
# AutoDock Vina: improving the speed and accuracy of docking #  
# with a new scoring function, efficient optimization and    #  
# multithreading, Journal of Computational Chemistry 31 (2010) #  
# 455-461                                                    #  
#                                                            #  
# DOI 10.1002/jcc.21334                                     #  
#                                                            #  
# Please see http://vina.scripps.edu for more information. #  
#####
```

```
WARNING: The search space volume > 27000 Angstrom^3 (See FAQ)  
Detected 8 CPUs  
Reading input ... done.  
Setting up the scoring function ... done.  
Analyzing the binding site ... done.  
Using random seed: 357772200  
Performing search ... done.  
Refining results ... done.
```

| mode | affinity<br>(kcal/mol) | dist from best mode<br>rmsd l.b. | rmsd u.b. |
|------|------------------------|----------------------------------|-----------|
| 1    | -9.7                   | 0.000                            | 0.000     |
| 2    | -9.0                   | 1.247                            | 6.694     |
| 3    | -8.3                   | 1.160                            | 2.302     |
| 4    | -7.3                   | 5.278                            | 6.957     |
| 5    | -7.2                   | 4.825                            | 7.140     |
| 6    | -7.2                   | 11.725                           | 13.274    |
| 7    | -7.2                   | 15.924                           | 16.716    |
| 8    | -7.2                   | 5.743                            | 8.042     |
| 9    | -7.1                   | 4.661                            | 6.902     |

```
Writing output ... done.
```



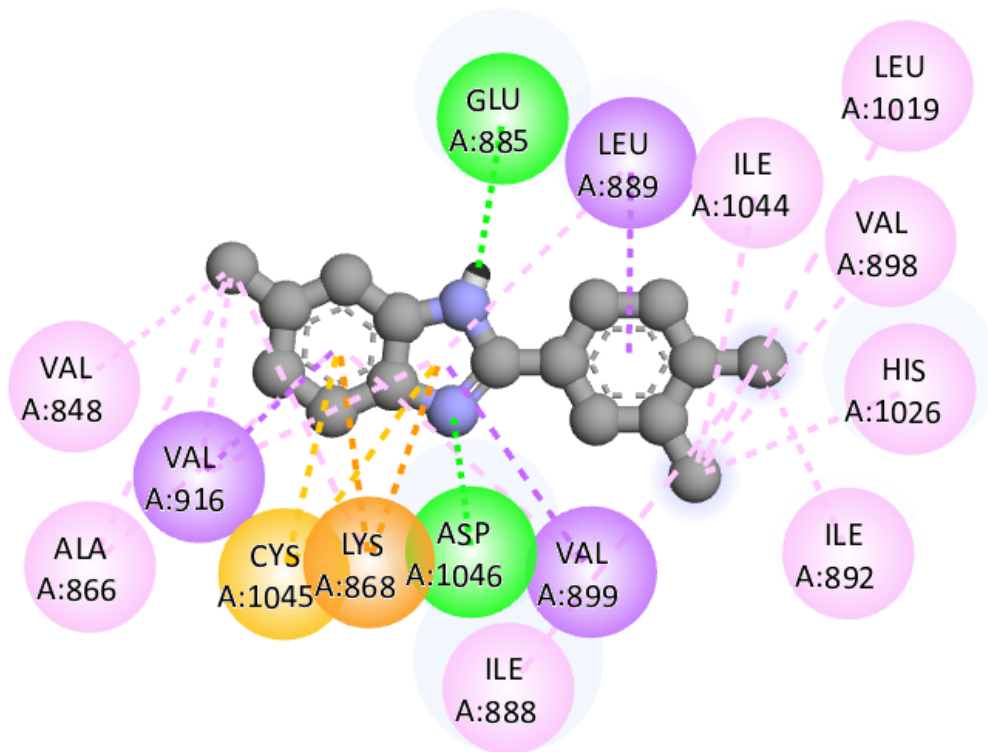

**Interactions**

|                                                                                     |                            |                                                                                     |           |
|-------------------------------------------------------------------------------------|----------------------------|-------------------------------------------------------------------------------------|-----------|
|  | Conventional Hydrogen Bond |  | Pi-Sulfur |
|  | Pi-Cation                  |  | Alkyl     |
|  | Pi-Sigma                   |  | Pi-Alkyl  |

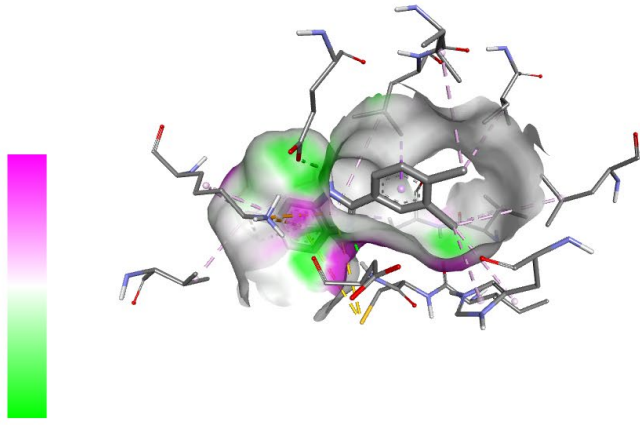

## 5.2. Compound 2d

```
#####  
# If you used AutoDock Vina in your work, please cite:      #  
#                                                            #  
# O. Trott, A. J. Olson,                                    #  
# AutoDock Vina: improving the speed and accuracy of docking #  
# with a new scoring function, efficient optimization and    #  
# multithreading, Journal of Computational Chemistry 31 (2010) #  
# 455-461                                                    #  
#                                                            #  
# DOI 10.1002/jcc.21334                                     #  
#                                                            #  
# Please see http://vina.scripps.edu for more information. #  
#####
```

```
WARNING: The search space volume > 27000 Angstrom^3 (See FAQ)  
Detected 8 CPUs  
Reading input ... done.  
Setting up the scoring function ... done.  
Analyzing the binding site ... done.  
Using random seed: 1649512408  
Performing search ... done.  
Refining results ... done.
```

| mode | affinity<br>(kcal/mol) | dist from best mode<br>rmsd l.b. | rmsd u.b. |
|------|------------------------|----------------------------------|-----------|
| 1    | -9.1                   | 0.000                            | 0.000     |
| 2    | -8.3                   | 5.312                            | 7.203     |
| 3    | -7.4                   | 4.190                            | 5.996     |
| 4    | -7.4                   | 6.482                            | 8.080     |
| 5    | -7.3                   | 7.366                            | 9.813     |
| 6    | -7.2                   | 16.091                           | 17.426    |
| 7    | -7.2                   | 5.729                            | 7.440     |
| 8    | -7.1                   | 7.025                            | 8.573     |
| 9    | -7.0                   | 6.298                            | 8.069     |

```
Writing output ... done.
```

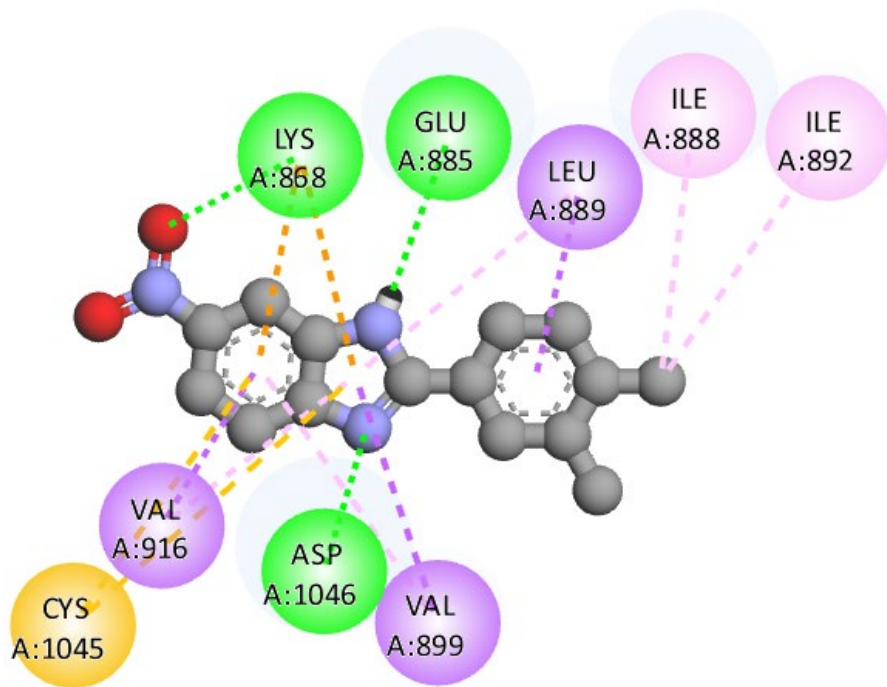

**Interactions**

|                                                                                     |                            |                                                                                     |           |
|-------------------------------------------------------------------------------------|----------------------------|-------------------------------------------------------------------------------------|-----------|
|  | Conventional Hydrogen Bond |  | Pi-Sulfur |
|  | Pi-Cation                  |  | Alkyl     |
|  | Pi-Sigma                   |  | Pi-Alkyl  |

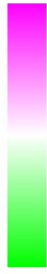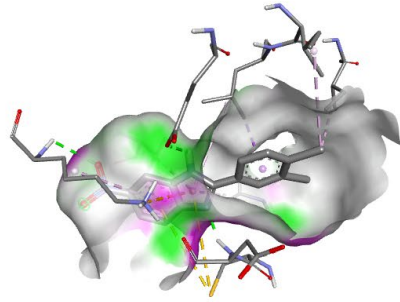

### 5.3. Compound 3s

```
#####  
# If you used AutoDock Vina in your work, please cite:      #  
#                                                            #  
# O. Trott, A. J. Olson,                                    #  
# AutoDock Vina: improving the speed and accuracy of docking #  
# with a new scoring function, efficient optimization and    #  
# multithreading, Journal of Computational Chemistry 31 (2010) #  
# 455-461                                                    #  
#                                                            #  
# DOI 10.1002/jcc.21334                                     #  
#                                                            #  
# Please see http://vina.scripps.edu for more information. #  
#####
```

```
WARNING: The search space volume > 27000 Angstrom^3 (See FAQ)  
Detected 8 CPUs  
Reading input ... done.  
Setting up the scoring function ... done.  
Analyzing the binding site ... done.  
Using random seed: -446671040  
Performing search ... done.  
Refining results ... done.
```

| mode | affinity<br>(kcal/mol) | dist from best mode<br>rmsd l.b. | rmsd u.b. |
|------|------------------------|----------------------------------|-----------|
| 1    | -9.4                   | 0.000                            | 0.000     |
| 2    | -9.0                   | 3.452                            | 6.212     |
| 3    | -8.2                   | 4.088                            | 7.349     |
| 4    | -8.1                   | 4.996                            | 7.908     |
| 5    | -8.1                   | 4.407                            | 7.814     |
| 6    | -7.9                   | 4.291                            | 7.752     |
| 7    | -7.8                   | 3.501                            | 8.346     |
| 8    | -7.6                   | 3.936                            | 6.892     |
| 9    | -7.4                   | 4.782                            | 8.257     |

```
Writing output ... done.
```

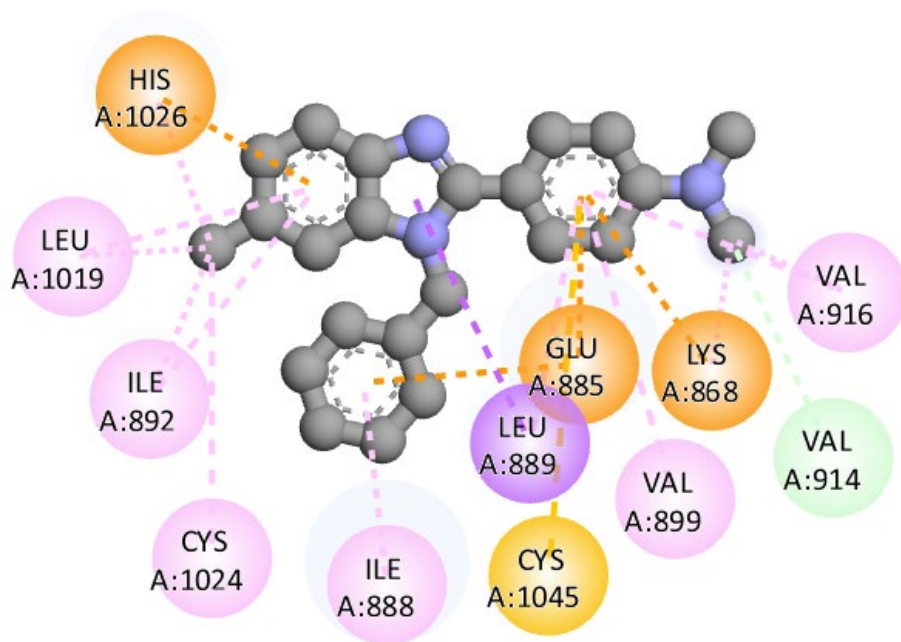

**Interactions**

|                                                                                     |                      |
|-------------------------------------------------------------------------------------|----------------------|
|  | Carbon Hydrogen Bond |
|  | Pi-Cation            |
|  | Pi-Anion             |
|  | Pi-Sigma             |

|                                                                                     |                |
|-------------------------------------------------------------------------------------|----------------|
|  | Pi-Sulfur      |
|  | Pi-Pi T-shaped |
|  | Alkyl          |
|  | Pi-Alkyl       |

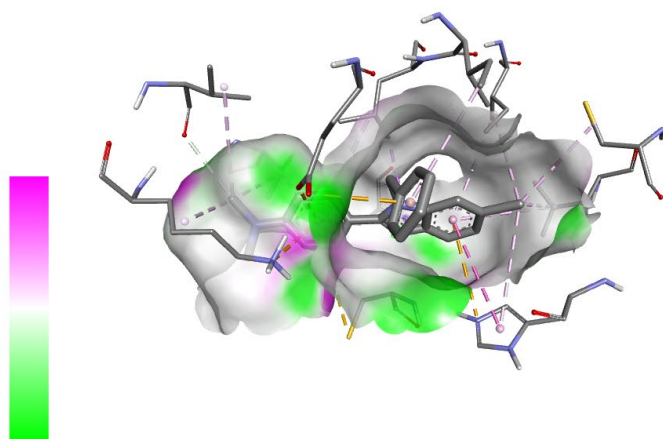



#### 5.4. Compound 4b

```
#####  
# If you used AutoDock Vina in your work, please cite:      #  
#                                                            #  
# O. Trott, A. J. Olson,                                     #  
# AutoDock Vina: improving the speed and accuracy of docking #  
# with a new scoring function, efficient optimization and    #  
# multithreading, Journal of Computational Chemistry 31 (2010) #  
# 455-461                                                    #  
#                                                            #  
# DOI 10.1002/jcc.21334                                     #  
#                                                            #  
# Please see http://vina.scripps.edu for more information. #  
#####
```

```
WARNING: The search space volume > 27000 Angstrom^3 (See FAQ)  
Detected 8 CPUs  
Reading input ... done.  
Setting up the scoring function ... done.  
Analyzing the binding site ... done.  
Using random seed: 814937824  
Performing search ... done.  
Refining results ... done.
```

| mode | affinity<br>(kcal/mol) | dist from best mode<br>rmsd l.b. | rmsd u.b. |
|------|------------------------|----------------------------------|-----------|
| 1    | -7.5                   | 0.000                            | 0.000     |
| 2    | -7.5                   | 3.546                            | 4.475     |
| 3    | -6.9                   | 3.800                            | 4.606     |
| 4    | -6.8                   | 4.950                            | 7.371     |
| 5    | -6.7                   | 5.094                            | 7.015     |
| 6    | -6.5                   | 12.937                           | 14.478    |
| 7    | -6.5                   | 3.159                            | 4.221     |
| 8    | -6.5                   | 4.827                            | 7.037     |
| 9    | -6.4                   | 4.947                            | 6.914     |

```
Writing output ... done.
```

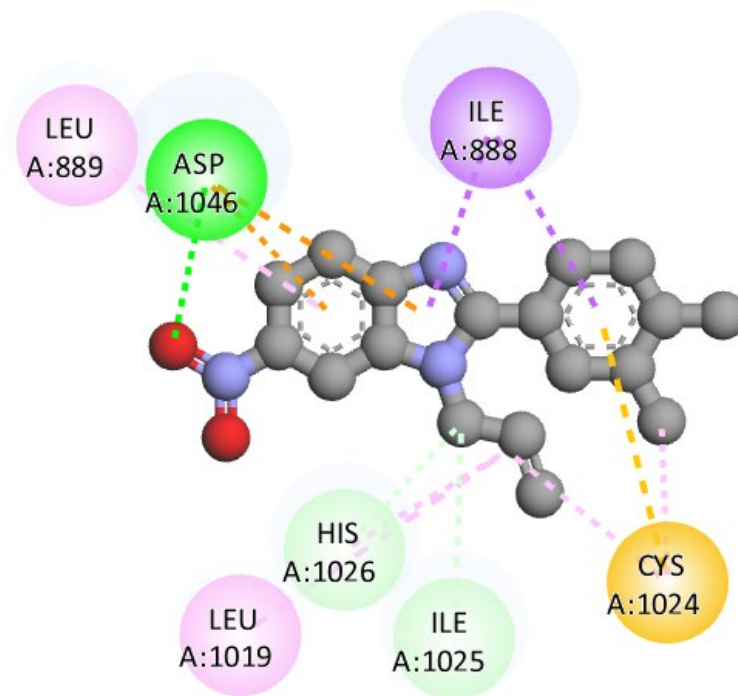

### Interactions

|                                                                                     |                            |                                                                                     |           |
|-------------------------------------------------------------------------------------|----------------------------|-------------------------------------------------------------------------------------|-----------|
|  | Conventional Hydrogen Bond |  | Pi-Sulfur |
|  | Carbon Hydrogen Bond       |  | Alkyl     |
|  | Pi-Anion                   |  | Pi-Alkyl  |
|  | Pi-Sigma                   |                                                                                     |           |

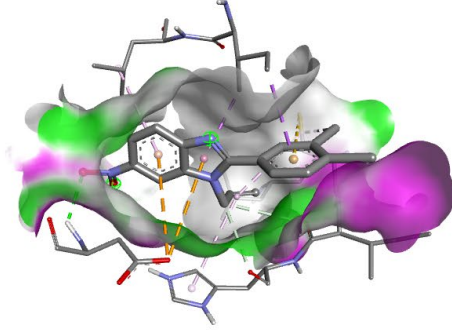

## 5.5. Compound 4k

```
#####  
# If you used AutoDock Vina in your work, please cite:      #  
#                                                            #  
# O. Trott, A. J. Olson,                                    #  
# AutoDock Vina: improving the speed and accuracy of docking #  
# with a new scoring function, efficient optimization and    #  
# multithreading, Journal of Computational Chemistry 31 (2010) #  
# 455-461                                                    #  
#                                                            #  
# DOI 10.1002/jcc.21334                                     #  
#                                                            #  
# Please see http://vina.scripps.edu for more information. #  
#####
```

```
WARNING: The search space volume > 27000 Angstrom^3 (See FAQ)  
Detected 8 CPUs  
Reading input ... done.  
Setting up the scoring function ... done.  
Analyzing the binding site ... done.  
Using random seed: -1112742280  
Performing search ... done.  
Refining results ... done.
```

| mode | affinity<br>(kcal/mol) | dist from best mode<br>rmsd l.b. | rmsd u.b. |
|------|------------------------|----------------------------------|-----------|
| 1    | -9.7                   | 0.000                            | 0.000     |
| 2    | -9.2                   | 3.687                            | 6.656     |
| 3    | -9.1                   | 3.824                            | 7.907     |
| 4    | -8.6                   | 4.792                            | 7.721     |
| 5    | -8.5                   | 4.793                            | 7.686     |
| 6    | -8.1                   | 4.185                            | 7.049     |
| 7    | -8.0                   | 7.063                            | 10.436    |
| 8    | -7.7                   | 11.875                           | 13.393    |
| 9    | -7.6                   | 12.848                           | 15.720    |

```
Writing output ... done.
```

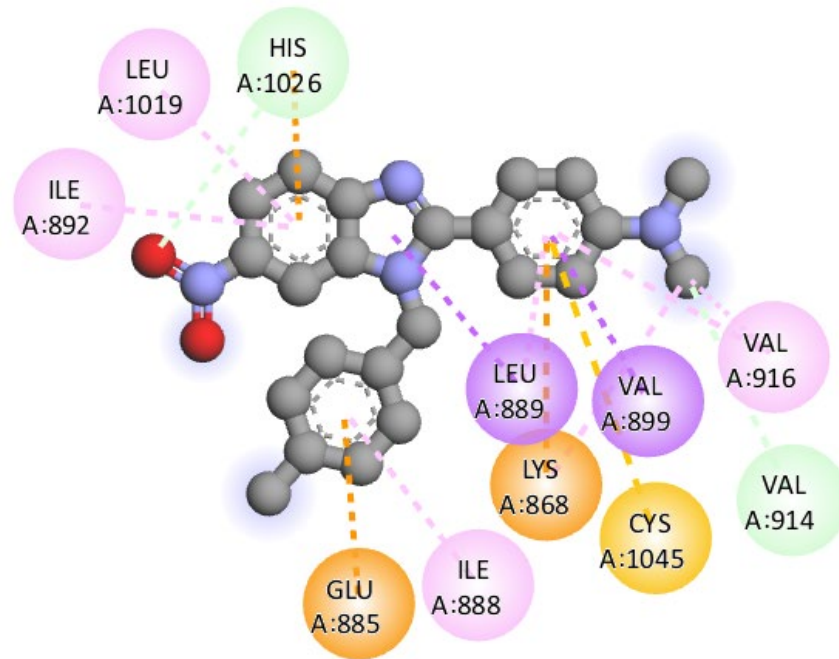

**Interactions**

|                                                                                     |                      |                                                                                     |                |
|-------------------------------------------------------------------------------------|----------------------|-------------------------------------------------------------------------------------|----------------|
|  | Carbon Hydrogen Bond |  | Pi-Sulfur      |
|  | Pi-Cation            |  | Pi-Pi T-shaped |
|  | Pi-Anion             |  | Alkyl          |
|  | Pi-Sigma             |  | Pi-Alkyl       |

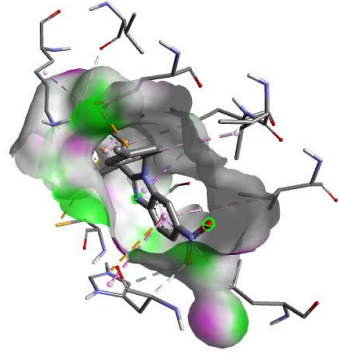

## 5.6. Compound PTX

```
#####  
# If you used AutoDock Vina in your work, please cite:      #  
#                                                            #  
# O. Trott, A. J. Olson,                                     #  
# AutoDock Vina: improving the speed and accuracy of docking #  
# with a new scoring function, efficient optimization and    #  
# multithreading, Journal of Computational Chemistry 31 (2010) #  
# 455-461                                                    #  
#                                                            #  
# DOI 10.1002/jcc.21334                                     #  
#                                                            #  
# Please see http://vina.scripps.edu for more information. #  
#####
```

```
WARNING: The search space volume > 27000 Angstrom^3 (See FAQ)  
Detected 8 CPUs  
Reading input ... done.  
Setting up the scoring function ... done.  
Analyzing the binding site ... done.  
Using random seed: 830497308  
Performing search ... done.  
Refining results ... done.
```

| mode | affinity<br>(kcal/mol) | dist from best mode<br>rmsd l.b. | rmsd u.b. |
|------|------------------------|----------------------------------|-----------|
| 1    | -7.8                   | 0.000                            | 0.000     |
| 2    | -7.6                   | 1.432                            | 3.556     |
| 3    | -7.3                   | 2.745                            | 4.845     |
| 4    | -7.3                   | 3.505                            | 7.224     |
| 5    | -7.1                   | 2.472                            | 4.817     |
| 6    | -7.0                   | 3.374                            | 7.920     |
| 7    | -6.8                   | 5.740                            | 9.612     |
| 8    | -6.7                   | 3.257                            | 6.261     |
| 9    | -6.7                   | 8.865                            | 12.688    |

```
Writing output ... done.
```

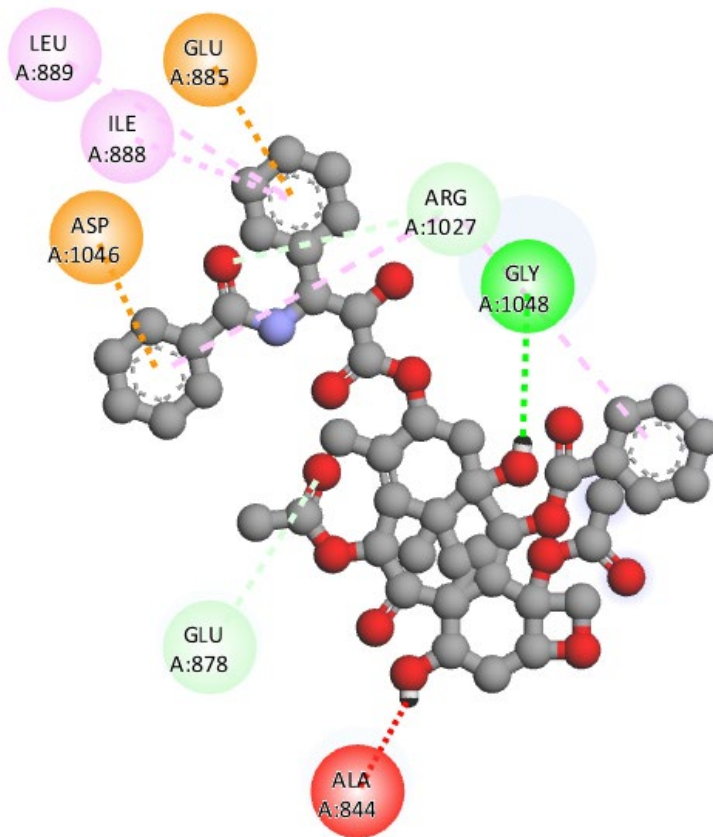

### Interactions

|                                                                                     |                            |                                                                                     |          |
|-------------------------------------------------------------------------------------|----------------------------|-------------------------------------------------------------------------------------|----------|
|  | Conventional Hydrogen Bond |  | Pi-Anion |
|  | Carbon Hydrogen Bond       |  | Pi-Alkyl |
|  | Unfavorable Donor-Donor    |                                                                                     |          |



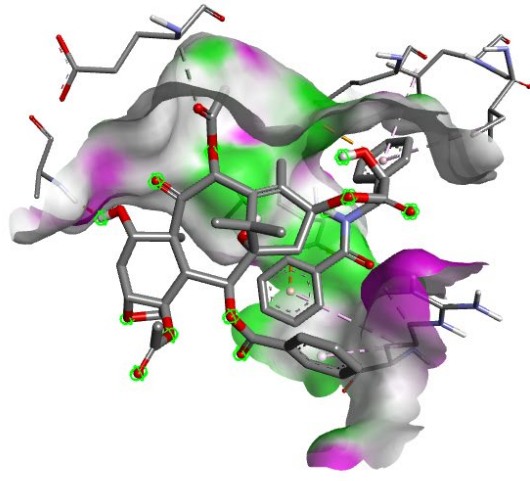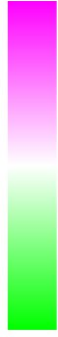

## 6. Fibroblast growth factor receptor 1 (PDB: 5A46)

Grid box volume – Autodock Vina

```
receptor = 5a46FGFR1.pdbqt  
ligand = ligand.pdbqt
```

```
out = out.pdbqt
```

```
center_x = 85.27  
center_y = 1.20  
center_z = 8.409
```

```
size_x = 52  
size_y = 42  
size_z = 48
```

```
energy_range = 4  
exhaustiveness = 8
```

## 6.1. Compound 1d

```
#####  
# If you used AutoDock Vina in your work, please cite:      #  
#                                                            #  
# O. Trott, A. J. Olson,                                    #  
# AutoDock Vina: improving the speed and accuracy of docking #  
# with a new scoring function, efficient optimization and    #  
# multithreading, Journal of Computational Chemistry 31 (2010) #  
# 455-461                                                    #  
#                                                            #  
# DOI 10.1002/jcc.21334                                     #  
#                                                            #  
# Please see http://vina.scripps.edu for more information.  #  
#####
```

```
WARNING: The search space volume > 27000 Angstrom^3 (See FAQ)  
Detected 8 CPUs  
Reading input ... done.  
Setting up the scoring function ... done.  
Analyzing the binding site ... done.  
Using random seed: 41367724  
Performing search ... done.  
Refining results ... done.
```

| mode | affinity<br>(kcal/mol) | dist from best mode<br>rmsd l.b. | rmsd u.b. |
|------|------------------------|----------------------------------|-----------|
| 1    | -8.3                   | 0.000                            | 0.000     |
| 2    | -7.6                   | 4.861                            | 9.436     |
| 3    | -7.5                   | 3.348                            | 7.863     |
| 4    | -7.2                   | 3.750                            | 5.296     |
| 5    | -7.1                   | 4.715                            | 7.049     |
| 6    | -6.7                   | 23.537                           | 25.733    |
| 7    | -6.6                   | 26.071                           | 27.622    |
| 8    | -6.6                   | 3.732                            | 5.449     |
| 9    | -6.5                   | 26.198                           | 26.869    |

```
Writing output ... done.
```

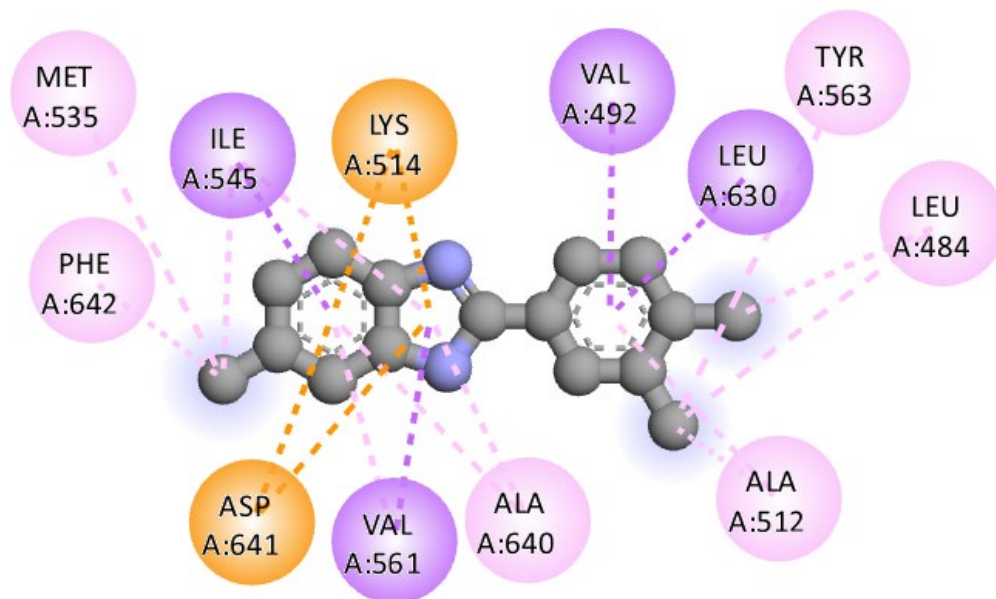

**Interactions**

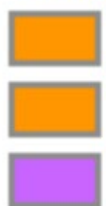

Pi-Cation  
Pi-Anion  
Pi-Sigma

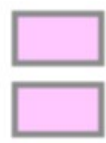

Alkyl  
Pi-Alkyl

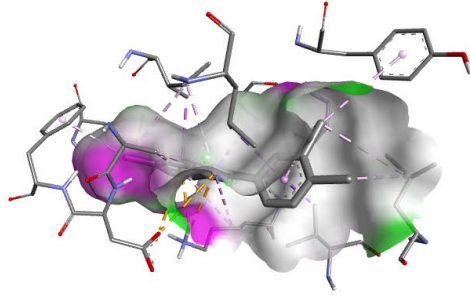

## 6.2. Compound 2d

```
#####  
# If you used AutoDock Vina in your work, please cite:      #  
#                                                            #  
# O. Trott, A. J. Olson,                                     #  
# AutoDock Vina: improving the speed and accuracy of docking #  
# with a new scoring function, efficient optimization and    #  
# multithreading, Journal of Computational Chemistry 31 (2010) #  
# 455-461                                                    #  
#                                                            #  
# DOI 10.1002/jcc.21334                                     #  
#                                                            #  
# Please see http://vina.scripps.edu for more information. #  
#####
```

```
WARNING: The search space volume > 27000 Angstrom^3 (See FAQ)  
Detected 8 CPUs  
Reading input ... done.  
Setting up the scoring function ... done.  
Analyzing the binding site ... done.  
Using random seed: -611865088  
Performing search ... done.  
Refining results ... done.
```

| mode | affinity<br>(kcal/mol) | dist from best mode<br>rmsd l.b. | rmsd u.b. |
|------|------------------------|----------------------------------|-----------|
| 1    | -8.1                   | 0.000                            | 0.000     |
| 2    | -8.0                   | 6.684                            | 9.254     |
| 3    | -7.9                   | 3.659                            | 5.226     |
| 4    | -7.8                   | 3.632                            | 5.394     |
| 5    | -7.3                   | 25.932                           | 26.790    |
| 6    | -7.2                   | 25.920                           | 27.152    |
| 7    | -7.2                   | 6.715                            | 9.362     |
| 8    | -7.0                   | 7.760                            | 10.694    |
| 9    | -6.9                   | 2.499                            | 3.464     |

```
Writing output ... done.
```

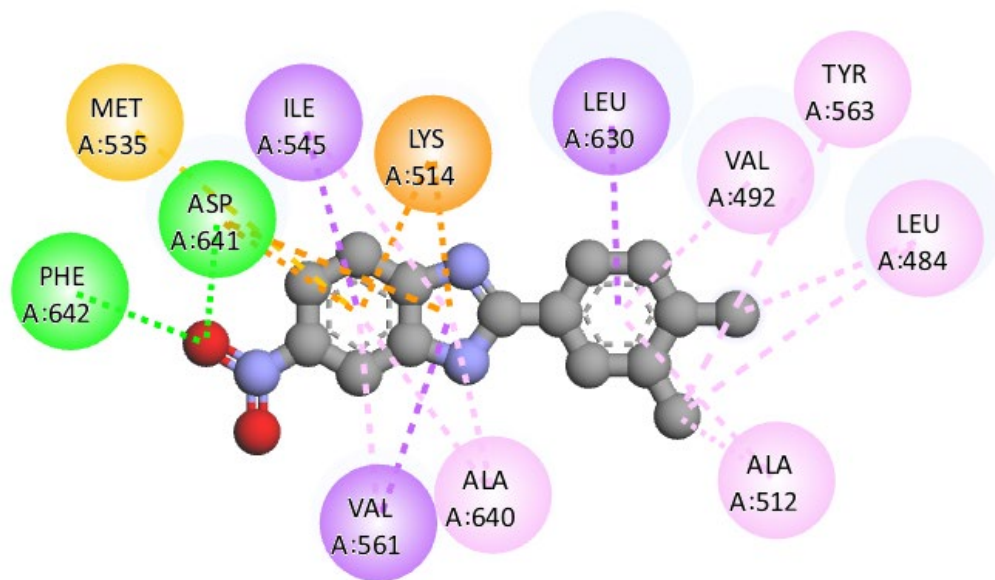

**Interactions**

|                                                                                     |                            |                                                                                     |           |
|-------------------------------------------------------------------------------------|----------------------------|-------------------------------------------------------------------------------------|-----------|
|  | Conventional Hydrogen Bond |  | Pi-Sulfur |
|  | Pi-Cation                  |  | Alkyl     |
|  | Pi-Anion                   |  | Pi-Alkyl  |
|  | Pi-Sigma                   |                                                                                     |           |

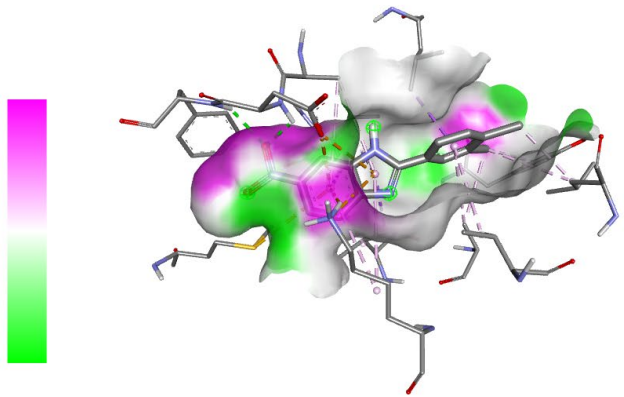



### 6.3. Compound 3s

```
#####  
# If you used AutoDock Vina in your work, please cite:      #  
#                                                            #  
# O. Trott, A. J. Olson,                                     #  
# AutoDock Vina: improving the speed and accuracy of docking #  
# with a new scoring function, efficient optimization and    #  
# multithreading, Journal of Computational Chemistry 31 (2010) #  
# 455-461                                                     #  
# |                                                           #  
# DOI 10.1002/jcc.21334                                       #  
#                                                            #  
# Please see http://vina.scripps.edu for more information. #  
#####
```

```
WARNING: The search space volume > 27000 Angstrom^3 (See FAQ)  
Detected 8 CPUs  
Reading input ... done.  
Setting up the scoring function ... done.  
Analyzing the binding site ... done.  
Using random seed: 1229292912  
Performing search ... done.  
Refining results ... done.
```

| mode | affinity<br>(kcal/mol) | dist from best mode<br>rmsd l.b. | rmsd u.b. |
|------|------------------------|----------------------------------|-----------|
| 1    | -9.6                   | 0.000                            | 0.000     |
| 2    | -8.6                   | 1.668                            | 2.494     |
| 3    | -7.7                   | 1.826                            | 4.264     |
| 4    | -7.2                   | 3.430                            | 7.869     |
| 5    | -7.2                   | 1.965                            | 2.924     |
| 6    | -7.1                   | 3.357                            | 5.590     |
| 7    | -7.1                   | 24.882                           | 26.990    |
| 8    | -7.0                   | 25.811                           | 28.059    |
| 9    | -7.0                   | 2.883                            | 5.882     |

```
Writing output ... done.
```

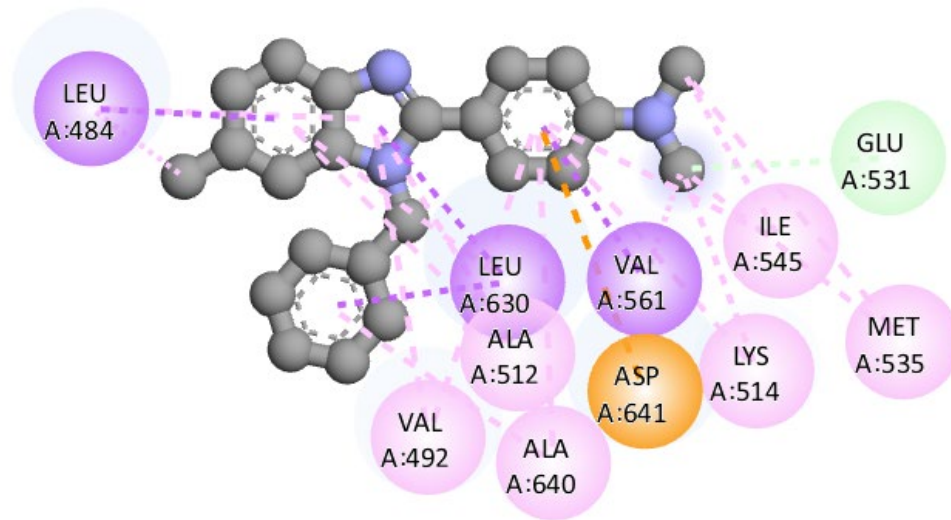

**Interactions**

- Carbon Hydrogen Bond
- Pi-Anion
- Pi-Sigma

- Alkyl
- Pi-Alkyl

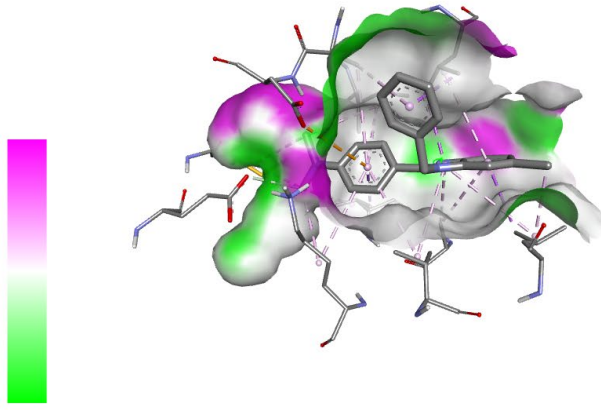

#### 6.4. Compound 4b

```
#####  
# If you used AutoDock Vina in your work, please cite:      #  
#                                                            #  
# O. Trott, A. J. Olson,                                    #  
# AutoDock Vina: improving the speed and accuracy of docking #  
# with a new scoring function, efficient optimization and    #  
# multithreading, Journal of Computational Chemistry 31 (2010) #  
# 455-461                                                    #  
#                                                            #  
# DOI 10.1002/jcc.21334                                     #  
#                                                            #  
# Please see http://vina.scripps.edu for more information. #  
#####
```

```
WARNING: The search space volume > 27000 Angstrom^3 (See FAQ)  
Detected 8 CPUs  
Reading input ... done.  
Setting up the scoring function ... done.  
Analyzing the binding site ... done.  
Using random seed: -1514471776  
Performing search ... done.  
Refining results ... done.
```

| mode | affinity<br>(kcal/mol) | dist from best mode<br>rmsd l.b. | rmsd u.b. |
|------|------------------------|----------------------------------|-----------|
| 1    | -8.0                   | 0.000                            | 0.000     |
| 2    | -7.2                   | 4.902                            | 6.985     |
| 3    | -7.1                   | 25.175                           | 26.689    |
| 4    | -7.1                   | 4.990                            | 7.272     |
| 5    | -6.9                   | 5.220                            | 7.485     |
| 6    | -6.8                   | 5.407                            | 7.802     |
| 7    | -6.7                   | 22.683                           | 24.504    |
| 8    | -6.7                   | 3.435                            | 5.041     |
| 9    | -6.7                   | 25.363                           | 27.466    |

```
Writing output ... done.
```

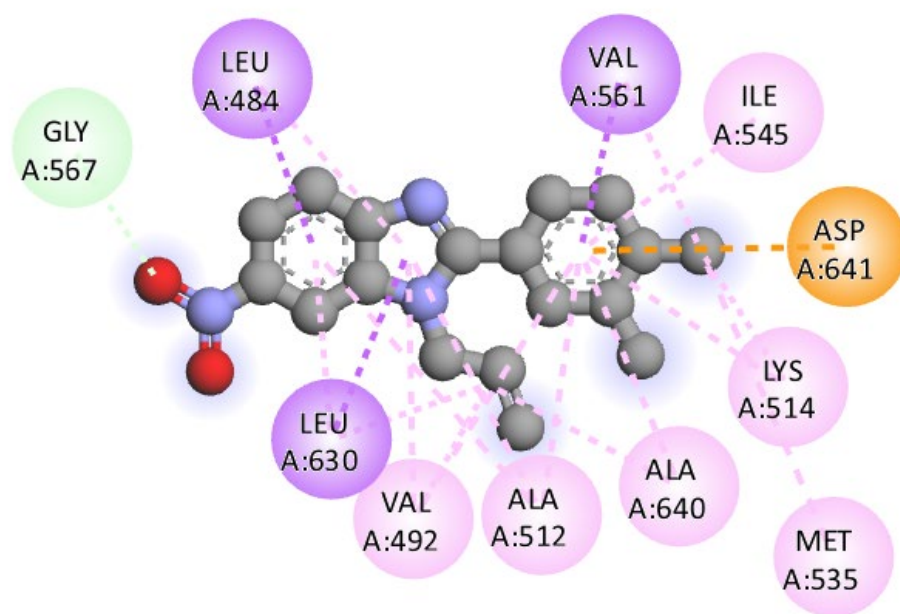

**Interactions**

- |                                                                                     |                      |                                                                                     |          |
|-------------------------------------------------------------------------------------|----------------------|-------------------------------------------------------------------------------------|----------|
|  | Carbon Hydrogen Bond |  | Alkyl    |
|  | Pi-Anion             |  | Pi-Alkyl |
|  | Pi-Sigma             |                                                                                     |          |

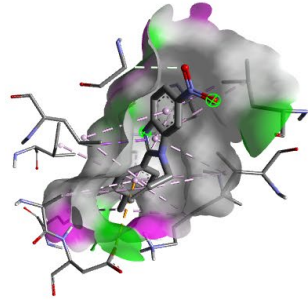

## 6.5. Compound 4k

```
#####  
# If you used AutoDock Vina in your work, please cite:      #  
#                                                            #  
# O. Trott, A. J. Olson,                                    #  
# AutoDock Vina: improving the speed and accuracy of docking #  
# with a new scoring function, efficient optimization and    #  
# multithreading, Journal of Computational Chemistry 31 (2010) #  
# 455-461                                                    #  
#                                                            #  
# DOI 10.1002/jcc.21334                                     #  
#                                                            #  
# Please see http://vina.scripps.edu for more information.  #  
#####
```

```
WARNING: The search space volume > 27000 Angstrom^3 (See FAQ)  
Detected 8 CPUs  
Reading input ... done.  
Setting up the scoring function ... done.  
Analyzing the binding site ... done.  
Using random seed: -1139121352  
Performing search ... done.  
Refining results ... done.
```

| mode | affinity<br>(kcal/mol) | dist from best mode<br>rmsd l.b. | rmsd u.b. |
|------|------------------------|----------------------------------|-----------|
| 1    | -8.5                   | 0.000                            | 0.000     |
| 2    | -8.1                   | 3.900                            | 5.823     |
| 3    | -7.7                   | 2.280                            | 2.755     |
| 4    | -7.7                   | 25.341                           | 27.273    |
| 5    | -7.6                   | 24.782                           | 27.193    |
| 6    | -7.5                   | 25.390                           | 28.124    |
| 7    | -7.5                   | 25.655                           | 28.153    |
| 8    | -7.4                   | 26.154                           | 28.429    |
| 9    | -7.3                   | 4.054                            | 6.422     |

```
Writing output ... done.
```

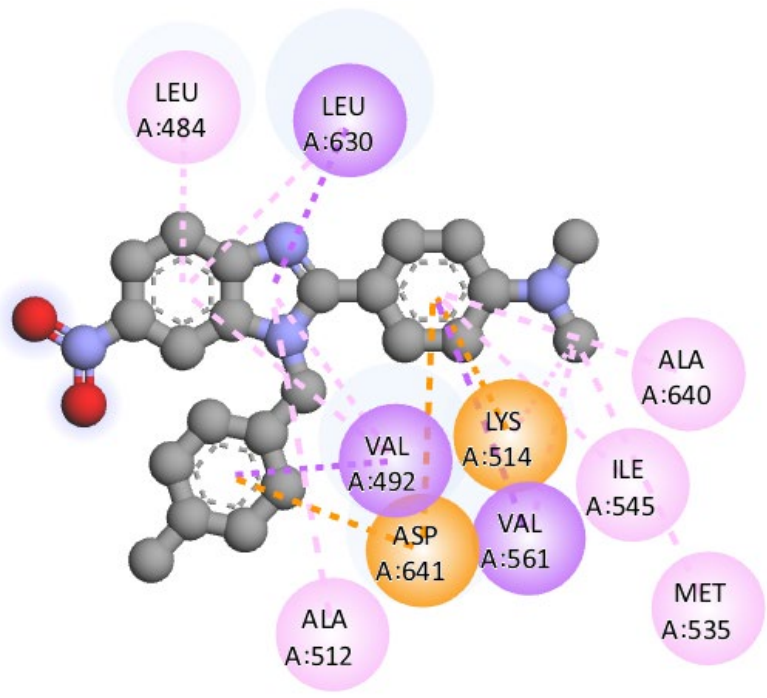

**Interactions**

- |                                                                                     |           |                                                                                     |          |
|-------------------------------------------------------------------------------------|-----------|-------------------------------------------------------------------------------------|----------|
|  | Pi-Cation |  | Alkyl    |
|  | Pi-Anion  |  | Pi-Alkyl |
|  | Pi-Sigma  |                                                                                     |          |



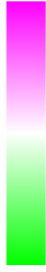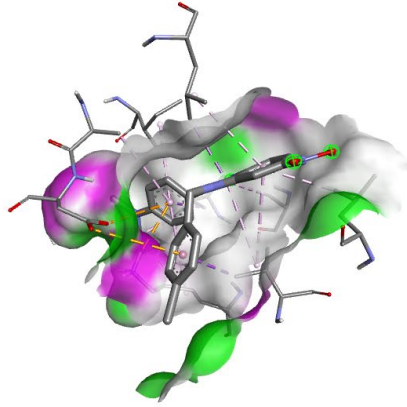

## 6.6. Compound PTX

```
#####  
# If you used AutoDock Vina in your work, please cite:      #  
#                                                            #  
# O. Trott, A. J. Olson,                                     #  
# AutoDock Vina: improving the speed and accuracy of docking #  
# with a new scoring function, efficient optimization and    #  
# multithreading, Journal of Computational Chemistry 31 (2010) #  
# 455-461                                                    #  
#                                                            #  
# DOI 10.1002/jcc.21334                                     #  
#                                                            #  
# Please see http://vina.scripps.edu for more information. #  
#####
```

```
WARNING: The search space volume > 27000 Angstrom^3 (See FAQ)  
Detected 8 CPUs  
Reading input ... done.  
Setting up the scoring function ... done.  
Analyzing the binding site ... done.  
Using random seed: 156777752  
Performing search ... done.  
Refining results ... done.
```

| mode | affinity   | dist from best mode |           |
|------|------------|---------------------|-----------|
|      | (kcal/mol) | rmsd l.b.           | rmsd u.b. |
| 1    | -10.5      | 0.000               | 0.000     |
| 2    | -9.8       | 2.913               | 4.940     |
| 3    | -9.5       | 1.946               | 4.442     |
| 4    | -9.4       | 3.558               | 10.426    |
| 5    | -9.4       | 2.684               | 4.388     |
| 6    | -9.3       | 3.141               | 5.010     |
| 7    | -9.2       | 4.014               | 9.926     |
| 8    | -9.2       | 3.942               | 9.070     |
| 9    | -9.1       | 3.016               | 6.438     |

```
Writing output ... done.
```

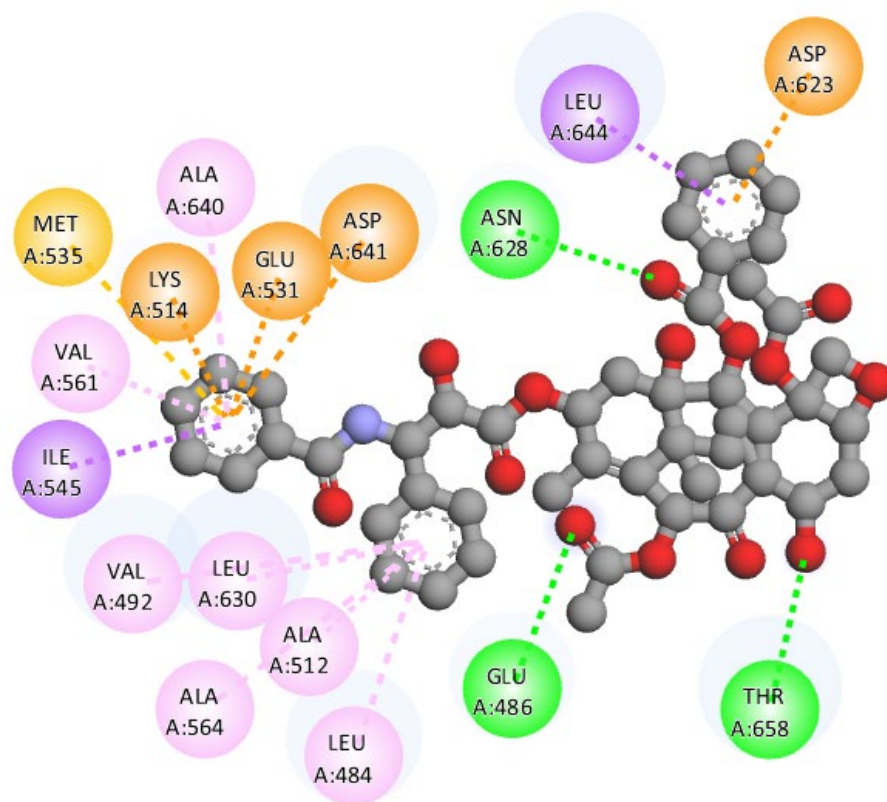

### Interactions

|                                                                                     |                            |                                                                                     |           |
|-------------------------------------------------------------------------------------|----------------------------|-------------------------------------------------------------------------------------|-----------|
|  | Conventional Hydrogen Bond |  | Pi-Sigma  |
|  | Pi-Cation                  |  | Pi-Sulfur |
|  | Pi-Anion                   |  | Pi-Alkyl  |

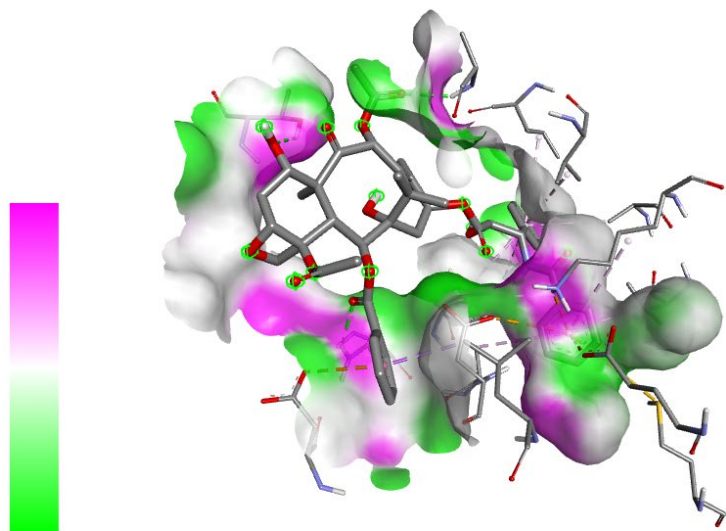

## 7. Histone deacetylase 6 (PDB: 5EEF)

Grid box volume – Autodock Vina

```
receptor = 5eefHDAC6.pdbqt  
ligand = ligand.pdbqt
```

```
out = out.pdbqt
```

```
center_x = -18.649  
center_y = -42.547  
center_z = -12.834
```

```
size_x = 30  
size_y = 42  
size_z = 30
```

```
energy_range = 4  
exhaustiveness = 8
```

## 7.1. Compound 1d

```
#####  
# If you used AutoDock Vina in your work, please cite:      #  
#                                                            #  
# O. Trott, A. J. Olson,                                     #  
# AutoDock Vina: improving the speed and accuracy of docking #  
# with a new scoring function, efficient optimization and    #  
# multithreading, Journal of Computational Chemistry 31 (2010) #  
# 455-461                                                    #  
#                                                            #  
# DOI 10.1002/jcc.21334                                     #  
#                                                            #  
# Please see http://vina.scripps.edu for more information. #  
#####
```

```
WARNING: The search space volume > 27000 Angstrom^3 (See FAQ)  
Detected 8 CPUs  
Reading input ... done.  
Setting up the scoring function ... done.  
Analyzing the binding site ... done.  
Using random seed: 1674649056  
Performing search ... done.  
Refining results ... done.
```

| mode | affinity<br>(kcal/mol) | dist from best mode<br>rmsd l.b. | rmsd u.b. |
|------|------------------------|----------------------------------|-----------|
| 1    | -7.4                   | 0.000                            | 0.000     |
| 2    | -7.1                   | 1.181                            | 6.764     |
| 3    | -7.1                   | 0.958                            | 1.781     |
| 4    | -6.9                   | 2.769                            | 3.886     |
| 5    | -6.9                   | 1.780                            | 2.415     |
| 6    | -6.8                   | 13.849                           | 16.312    |
| 7    | -6.7                   | 2.160                            | 2.556     |
| 8    | -6.6                   | 1.405                            | 2.213     |
| 9    | -6.6                   | 4.191                            | 6.987     |

```
Writing output ... done.
```

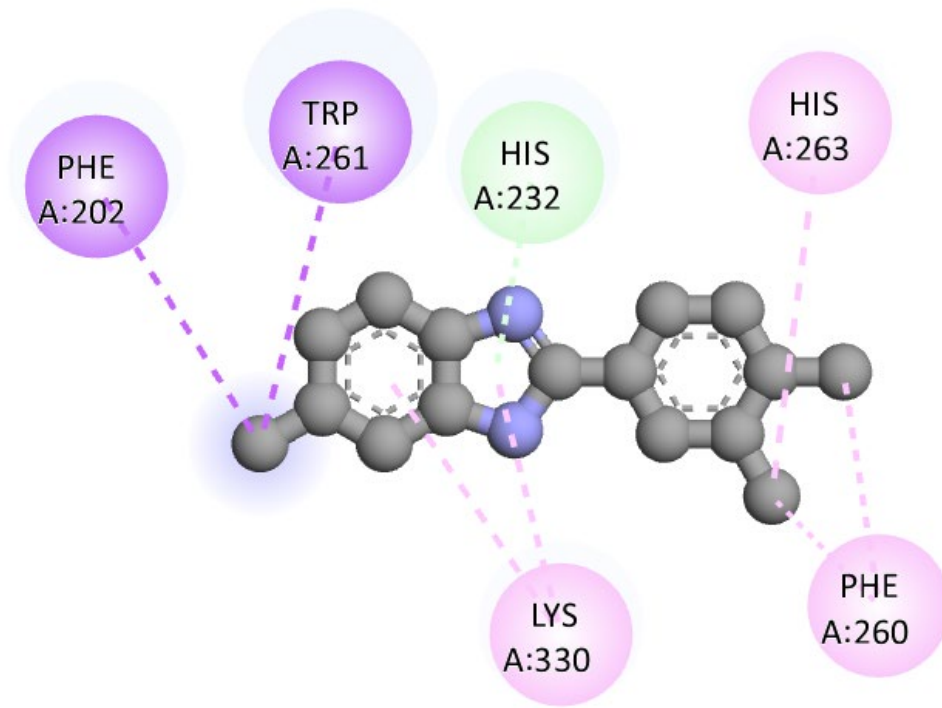

**Interactions**

- |                                                                                     |                        |                                                                                     |                |
|-------------------------------------------------------------------------------------|------------------------|-------------------------------------------------------------------------------------|----------------|
|  | Pi-Donor Hydrogen Bond |  | Pi-Pi T-shaped |
|  | Pi-Sigma               |  | Pi-Alkyl       |

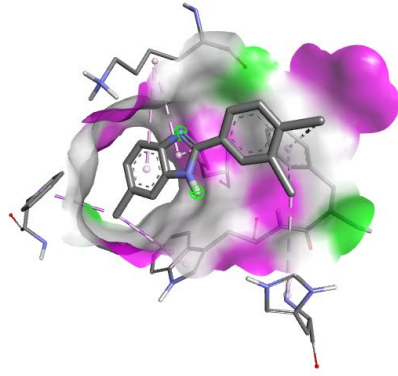



## 7.2. Compound 2d

```
#####  
# If you used AutoDock Vina in your work, please cite:      #  
#                                                           #  
# O. Trott, A. J. Olson,                                    #  
# AutoDock Vina: improving the speed and accuracy of docking #  
# with a new scoring function, efficient optimization and    #  
# multithreading, Journal of Computational Chemistry 31 (2010) #  
# 455-461                                                    #  
#                                                           #  
# DOI 10.1002/jcc.21334                                     #  
#                                                           #  
# Please see http://vina.scripps.edu for more information. #  
#####
```

```
WARNING: The search space volume > 27000 Angstrom^3 (See FAQ)  
Detected 8 CPUs  
Reading input ... done.  
Setting up the scoring function ... done.  
Analyzing the binding site ... done.  
Using random seed: -44090860  
Performing search ... done.  
Refining results ... done.
```

| mode | affinity<br>(kcal/mol) | dist from best mode<br>rmsd l.b. | rmsd u.b. |
|------|------------------------|----------------------------------|-----------|
| 1    | -8.2                   | 0.000                            | 0.000     |
| 2    | -8.1                   | 0.702                            | 1.564     |
| 3    | -8.0                   | 1.686                            | 1.930     |
| 4    | -7.4                   | 3.010                            | 3.648     |
| 5    | -7.2                   | 3.153                            | 3.784     |
| 6    | -7.1                   | 5.579                            | 7.837     |
| 7    | -7.1                   | 3.337                            | 4.433     |
| 8    | -6.9                   | 13.935                           | 15.213    |
| 9    | -6.7                   | 14.524                           | 15.626    |

```
Writing output ... done.
```

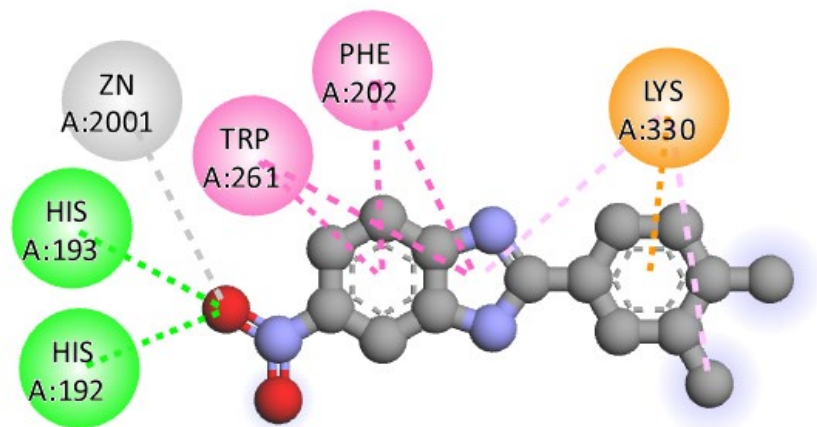

### Interactions

|                                                                                     |                            |
|-------------------------------------------------------------------------------------|----------------------------|
|  | Conventional Hydrogen Bond |
|  | Metal-Acceptor             |
|  | Pi-Cation                  |

|                                                                                     |               |
|-------------------------------------------------------------------------------------|---------------|
|  | Pi-Pi Stacked |
|  | Alkyl         |
|  | Pi-Alkyl      |

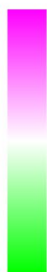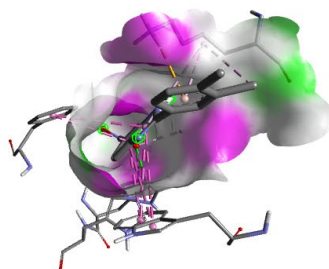

### 7.3. Compound 3s

```
#####  
# If you used AutoDock Vina in your work, please cite:      #  
#                                                           #  
# O. Trott, A. J. Olson,                                   #  
# AutoDock Vina: improving the speed and accuracy of docking #  
# with a new scoring function, efficient optimization and    #  
# multithreading, Journal of Computational Chemistry 31 (2010) #  
# 455-461                                                    #  
#                                                           #  
# DOI 10.1002/jcc.21334                                     #  
#                                                           #  
# Please see http://vina.scripps.edu for more information. #  
#####
```

WARNING: The search space volume > 27000 Angstrom<sup>3</sup> (See FAQ)

Detected 8 CPUs

Reading input ... done.

Setting up the scoring function ... done.

Analyzing the binding site ... done.

Using random seed: 1911046216

Performing search ... done.

Refining results ... done.

| mode | affinity   | dist from best mode |           |
|------|------------|---------------------|-----------|
|      | (kcal/mol) | rmsd l.b.           | rmsd u.b. |
| 1    | -7.6       | 0.000               | 0.000     |
| 2    | -7.0       | 2.977               | 5.814     |
| 3    | -7.0       | 3.317               | 5.592     |
| 4    | -6.9       | 3.187               | 5.676     |
| 5    | -6.9       | 2.803               | 5.544     |
| 6    | -6.6       | 2.871               | 4.163     |
| 7    | -6.6       | 1.436               | 2.090     |
| 8    | -6.3       | 11.991              | 14.459    |
| 9    | -6.3       | 11.026              | 13.287    |

Writing output ... done.

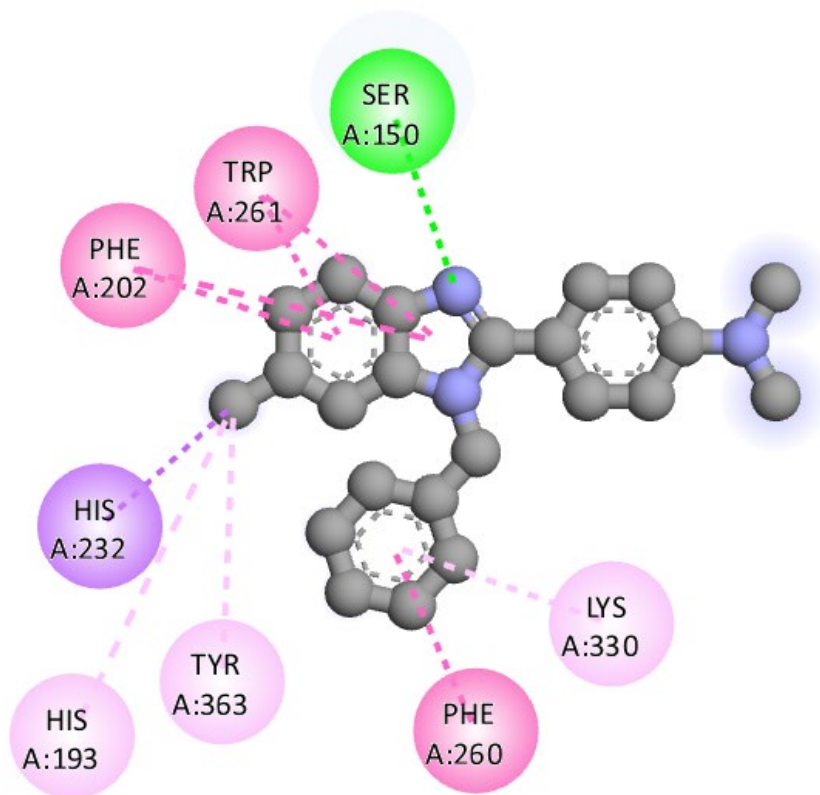

### Interactions

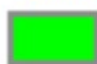

Conventional Hydrogen Bond

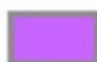

Pi-Sigma

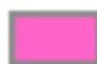

Pi-Pi Stacked

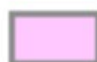

Pi-Alkyl

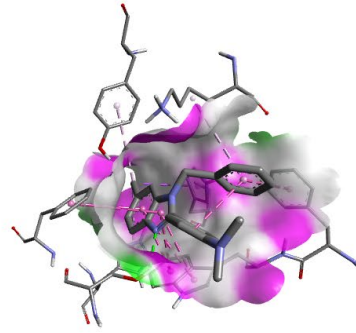

#### 7.4. Compound 4b

```
#####  
# If you used AutoDock Vina in your work, please cite:      #  
#                                                            #  
# O. Trott, A. J. Olson,                                     #  
# AutoDock Vina: improving the speed and accuracy of docking #  
# with a new scoring function, efficient optimization and    #  
# multithreading, Journal of Computational Chemistry 31 (2010) #  
# 455-461                                                    #  
#                                                            #  
# DOI 10.1002/jcc.21334                                     #  
#                                                            #  
# Please see http://vina.scripps.edu for more information. #  
#####
```

```
WARNING: The search space volume > 27000 Angstrom^3 (See FAQ)  
Detected 8 CPUs  
Reading input ... done.  
Setting up the scoring function ... done.  
Analyzing the binding site ... done.  
Using random seed: 924438784  
Performing search ... done.  
Refining results ... done.
```

| mode | affinity   | dist from best mode |           |
|------|------------|---------------------|-----------|
|      | (kcal/mol) | rmsd l.b.           | rmsd u.b. |
| 1    | -7.9       | 0.000               | 0.000     |
| 2    | -7.7       | 1.586               | 2.485     |
| 3    | -7.0       | 5.247               | 7.428     |
| 4    | -7.0       | 1.988               | 2.836     |
| 5    | -6.5       | 12.783              | 14.597    |
| 6    | -6.2       | 4.781               | 6.844     |
| 7    | -6.2       | 5.827               | 7.962     |
| 8    | -6.2       | 4.422               | 6.417     |
| 9    | -6.1       | 10.367              | 12.309    |

```
Writing output ... done.
```

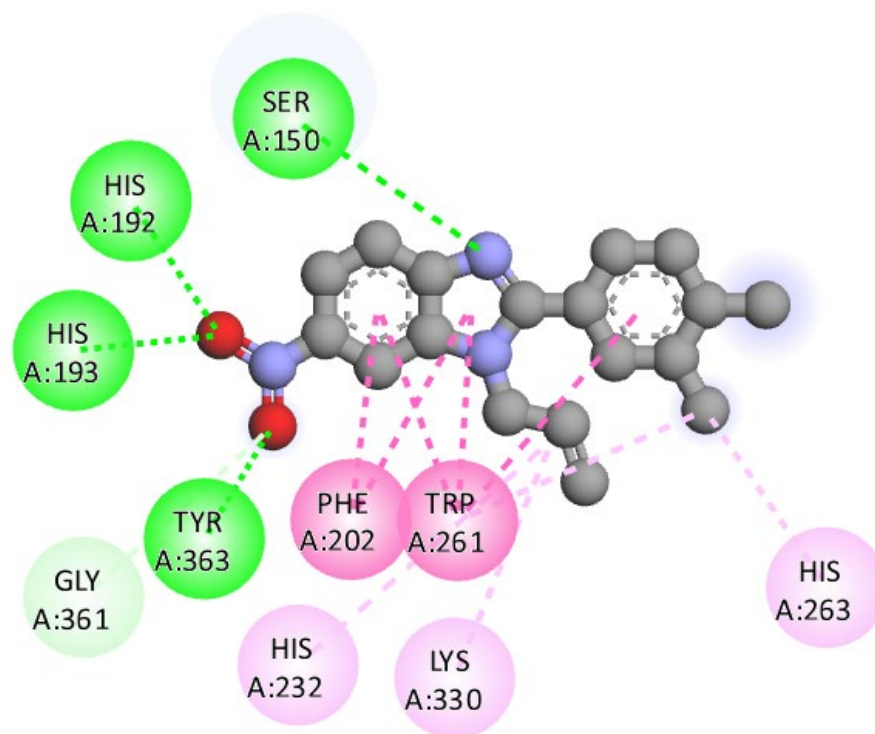

**Interactions**



Conventional Hydrogen Bond

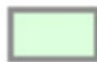

Carbon Hydrogen Bond

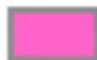

Pi-Pi Stacked



Pi-Pi T-shaped



Alkyl



Pi-Alkyl



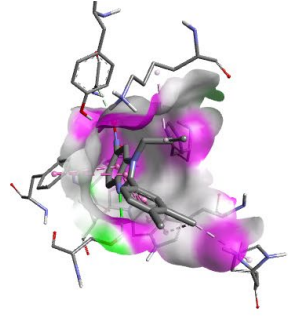

## 7.5. Compound 4k

```
#####  
# If you used AutoDock Vina in your work, please cite:      #  
#                                                            #  
# O. Trott, A. J. Olson,                                    #  
# AutoDock Vina: improving the speed and accuracy of docking #  
# with a new scoring function, efficient optimization and    #  
# multithreading, Journal of Computational Chemistry 31 (2010) #  
# 455-461                                                    #  
#                                                            #  
# DOI 10.1002/jcc.21334                                     #  
#                                                            #  
# Please see http://vina.scripps.edu for more information. #  
#####
```

```
WARNING: The search space volume > 27000 Angstrom^3 (See FAQ)  
Detected 8 CPUs  
Reading input ... done.  
Setting up the scoring function ... done.  
Analyzing the binding site ... done.  
Using random seed: -1168086400  
Performing search ... done.  
Refining results ... done.
```

| mode | affinity   | dist from best mode |           |
|------|------------|---------------------|-----------|
|      | (kcal/mol) | rmsd l.b.           | rmsd u.b. |
| 1    | -8.9       | 0.000               | 0.000     |
| 2    | -8.4       | 1.263               | 1.696     |
| 3    | -7.7       | 2.984               | 4.269     |
| 4    | -7.4       | 4.045               | 6.254     |
| 5    | -7.2       | 4.236               | 6.264     |
| 6    | -7.0       | 12.463              | 14.806    |
| 7    | -6.9       | 4.631               | 7.618     |
| 8    | -6.9       | 2.068               | 2.984     |
| 9    | -6.7       | 3.937               | 6.194     |

```
Writing output ... done.
```

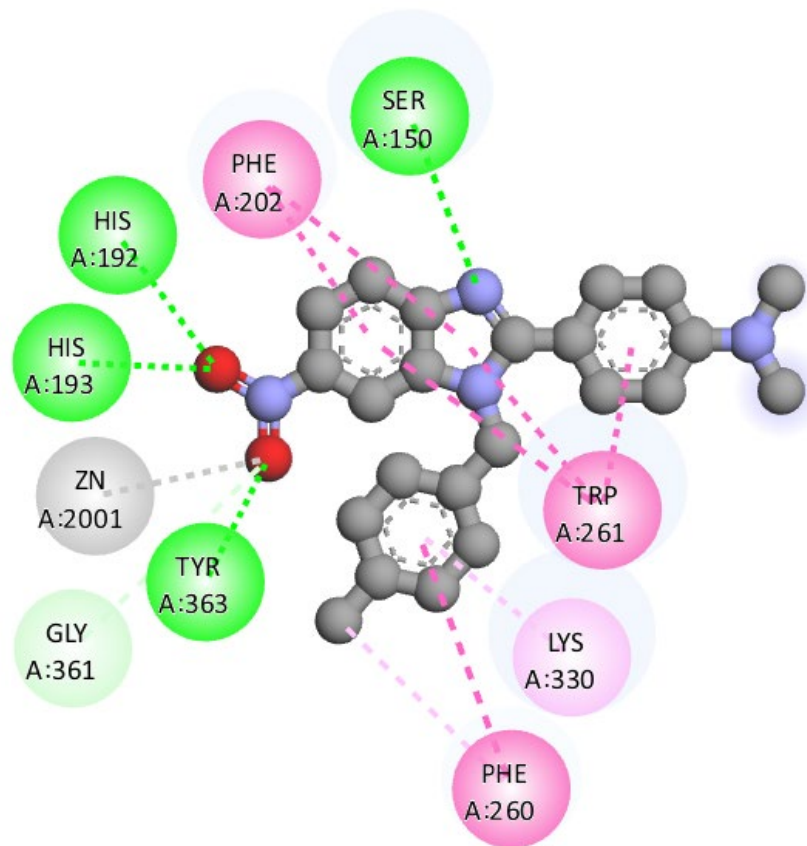

**Interactions**

- Conventional Hydrogen Bond
- Carbon Hydrogen Bond
- Metal-Acceptor

- Pi-Pi Stacked
- Pi-Pi T-shaped
- Pi-Alkyl

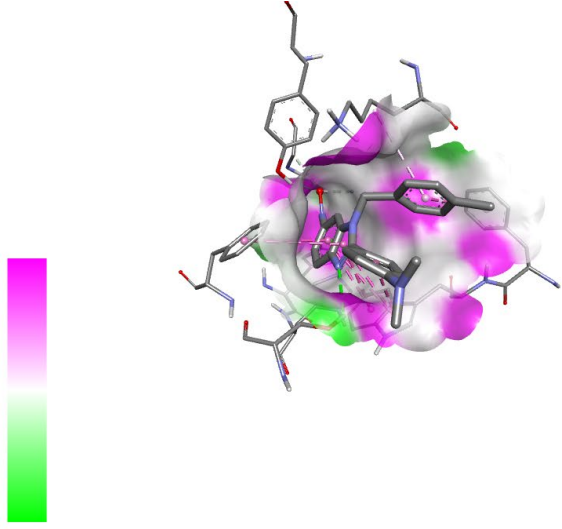

## 7.6. Compound PTX

```
#####  
# If you used AutoDock Vina in your work, please cite:      #  
#                                                            #  
# O. Trott, A. J. Olson,                                    #  
# AutoDock Vina: improving the speed and accuracy of docking #  
# with a new scoring function, efficient optimization and    #  
# multithreading, Journal of Computational Chemistry 31 (2010) #  
# 455-461                                                    #  
#                                                            #  
# DOI 10.1002/jcc.21334                                     #  
#                                                            #  
# Please see http://vina.scripps.edu for more information. #  
#####
```

```
WARNING: The search space volume > 27000 Angstrom^3 (See FAQ)  
Detected 8 CPUs  
Reading input ... done.  
Setting up the scoring function ... done.  
Analyzing the binding site ... done.  
Using random seed: -1815704864  
Performing search ... done.  
Refining results ... done.
```

| mode | affinity<br>(kcal/mol) | dist from best mode<br>rmsd l.b. | rmsd u.b. |
|------|------------------------|----------------------------------|-----------|
| 1    | -8.8                   | 0.000                            | 0.000     |
| 2    | -8.6                   | 1.433                            | 3.830     |
| 3    | -8.6                   | 2.045                            | 4.464     |
| 4    | -8.2                   | 3.041                            | 10.618    |
| 5    | -8.2                   | 1.686                            | 2.402     |
| 6    | -8.1                   | 2.727                            | 10.379    |
| 7    | -8.0                   | 2.358                            | 4.290     |
| 8    | -7.9                   | 2.207                            | 4.677     |
| 9    | -7.8                   | 2.552                            | 9.861     |

```
Writing output ... done.
```

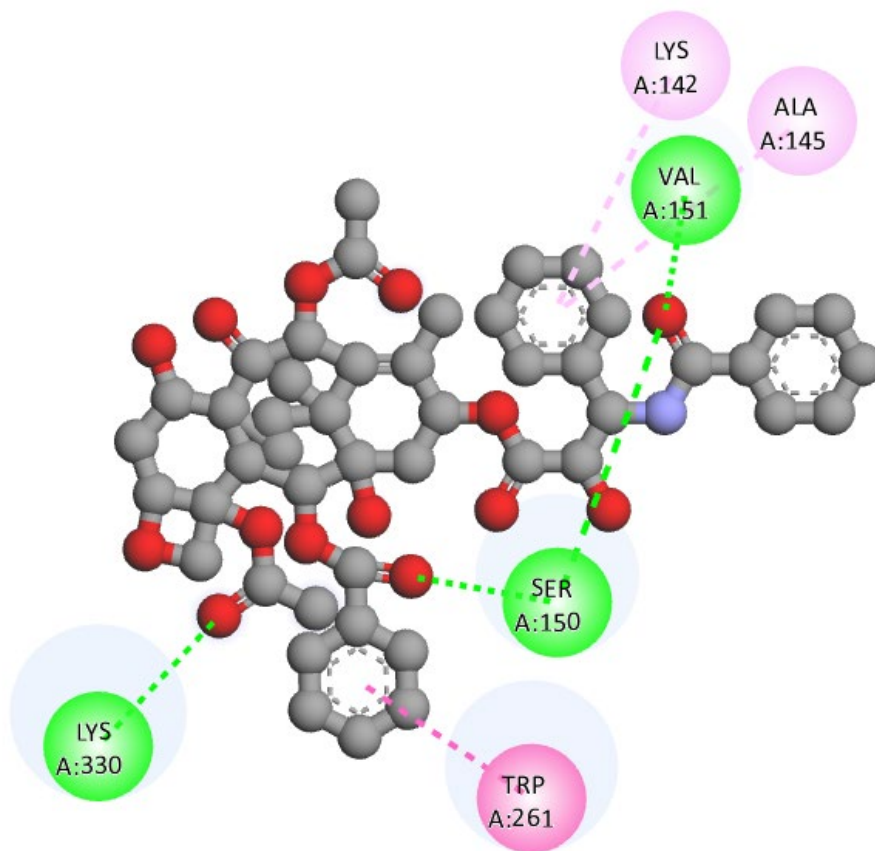

### Interactions

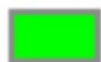

Conventional Hydrogen Bond



Pi-Alkyl

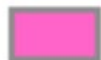

Pi-Pi Stacked
